# Supplementary material
Source: publisher figshare collection journal article supplement (https://gsajournals.figshare.com/ndownloader/files/22291764)
Supplement: Supplementary file 1 [file 22291764]

## Sheet: All_Fungal_RNAseq
arb2_gene	locus	sample_1	sample_2	status	value_1	value_2	log2(fold_change)	test_stat	p_value	q_value	significant	Description	PFAM	signalp	SSP	TF	GO	secondary_metabolism	MEROPS	TMHMM	sc16a_gene	% Identical Sites	Bit-Score	E Value	Query coverage	SC16a	CcL	CcD	PFAM annotation	GO annotation (terminal nodes only)	KEGG annotation	SignalP/SmallSecretedProteins	Transcription factors	Transmembrane domains	MEROPS proteases	Manual annotations	Secondary metabolism	SC16a -> CcL: Up/Down	SC16a -> CcL: q value	SC16a -> CcL: : q-value <= 0.05, fold change >= 2, and >= 1 sample with >= 4 expression value?	SC16a -> CcD: Up/Down	SC16a -> CcD: q value	SC16a -> CcD: : q-value <= 0.05, fold change >= 2, and >= 1 sample with >= 4 expression value?	CcL -> CcD: Up/Down	CcL -> CcD: q value	CcL -> CcD: : q-value <= 0.05, fold change >= 2, and >= 1 sample with >= 4 expression value?
Ophcf2|00001	scaffold_01:7248-9339	Alive	Dead	OK	129.731	177.478	0.452118	0.868427	0.0513	0.10647	no	AMP-dependent synthetase/ligase	PF00501|AMP-binding;	NA	NA	NA	GO:0003824|catalytic activity; GO:0003674|molecular_function;	NA	NA	NA	Ophio5|2574	0.741	958.362	0	0.9985	47.9389	135.066	72.8252	PF00501.23|AMP-binding;PF13193.1|AMP-binding_C	GO:0003824|catalytic activity;GO:0008152|metabolic process	NA	NA	NA	NA	NA	NA	NA	Up	0.000285532	Yes	Up	0.0648595	No	Down	0.00934678	No
Ophcf2|00001	scaffold_01:7248-9339	Alive	Fungus	OK	129.731	43.5252	-1.5756	-3.23418	5e-05	0.000237974	yes	AMP-dependent synthetase/ligase	PF00501|AMP-binding;	NA	NA	NA	GO:0003824|catalytic activity; GO:0003674|molecular_function;	NA	NA	NA	Ophio5|2574	0.741	958.362	0	0.9985	47.9389	135.066	72.8252	PF00501.23|AMP-binding;PF13193.1|AMP-binding_C	GO:0003824|catalytic activity;GO:0008152|metabolic process	NA	NA	NA	NA	NA	NA	NA	Up	0.000285532	Yes	Up	0.0648595	No	Down	0.00934678	No
Ophcf2|00001	scaffold_01:7248-9339	Dead	Fungus	OK	177.478	43.5252	-2.02771	-4.28655	5e-05	0.000237974	yes	AMP-dependent synthetase/ligase	PF00501|AMP-binding;	NA	NA	NA	GO:0003824|catalytic activity; GO:0003674|molecular_function;	NA	NA	NA	Ophio5|2574	0.741	958.362	0	0.9985	47.9389	135.066	72.8252	PF00501.23|AMP-binding;PF13193.1|AMP-binding_C	GO:0003824|catalytic activity;GO:0008152|metabolic process	NA	NA	NA	NA	NA	NA	NA	Up	0.000285532	Yes	Up	0.0648595	No	Down	0.00934678	No
Ophcf2|00002	scaffold_01:9795-12754	Alive	Dead	OK	58.4375	44.1518	-0.404421	-0.907562	0.038	0.0832396	no	regulatory protein Ral2	PF13415|Kelch_3; PF13418|Kelch_4;	NA	NA	NA	NA	NA	NA	NA	Ophio5|4438	0.731	1185.24	0	0.9713	77.3156	69.9309	70.8066	PF13418.1|Kelch_4;PF13418.1|Kelch_4;PF13415.1|Kelch_3	NA	NA	NA	NA	NA	NA	NA	NA	Down	0.715085	No	Down	0.759045	No	Up	0.96669	No
Ophcf2|00002	scaffold_01:9795-12754	Alive	Fungus	OK	58.4375	57.819	-0.0153507	-0.0340864	0.9473	0.967163	no	regulatory protein Ral2	PF13415|Kelch_3; PF13418|Kelch_4;	NA	NA	NA	NA	NA	NA	NA	Ophio5|4438	0.731	1185.24	0	0.9713	77.3156	69.9309	70.8066	PF13418.1|Kelch_4;PF13418.1|Kelch_4;PF13415.1|Kelch_3	NA	NA	NA	NA	NA	NA	NA	NA	Down	0.715085	No	Down	0.759045	No	Up	0.96669	No
Ophcf2|00002	scaffold_01:9795-12754	Dead	Fungus	OK	44.1518	57.819	0.389071	0.88141	0.0837	0.158383	no	regulatory protein Ral2	PF13415|Kelch_3; PF13418|Kelch_4;	NA	NA	NA	NA	NA	NA	NA	Ophio5|4438	0.731	1185.24	0	0.9713	77.3156	69.9309	70.8066	PF13418.1|Kelch_4;PF13418.1|Kelch_4;PF13415.1|Kelch_3	NA	NA	NA	NA	NA	NA	NA	NA	Down	0.715085	No	Down	0.759045	No	Up	0.96669	No
Ophcf2|00003	scaffold_01:13446-14168	Dead	Fungus	OK	383.321	1407.24	1.87625	3.66097	5e-05	0.000237974	yes	Mitochondrial peroxiredoxin PRX1	PF00578|AhpC-TSA; PF08534|Redoxin; PF10417|1-cysPrx_C;	NA	NA	NA	GO:0003824|catalytic activity; GO:0051920|peroxiredoxin activity; GO:0055114|oxidation-reduction process; GO:0003674|molecular_function; GO:0016491|oxidoreductase activity; GO:0008150|biological_process; GO:0016684|oxidoreductase activity, acting on peroxide as acceptor; GO:0016209|antioxidant activity; GO:0008152|metabolic process;	NA	NA	NA	Ophio5|4439	0.94	423.705	9.3e-154	0.9954	1832.15	212.878	399.526	PF00578.16|AhpC-TSA;PF10417.4|1-cysPrx_C;PF08534.5|Redoxin	GO:0016209|antioxidant activity;GO:0016491|oxidoreductase activity;GO:0051920|peroxiredoxin activity;GO:0055114|oxidation-reduction process	NA	NA	NA	NA	NA	NA	NA	Down	0.000285532	Yes	Down	0.000285532	Yes	Up	0.00666187	No
Ophcf2|00003	scaffold_01:13446-14168	Alive	Fungus	OK	408.053	1407.24	1.78604	3.46856	5e-05	0.000237974	yes	Mitochondrial peroxiredoxin PRX1	PF00578|AhpC-TSA; PF08534|Redoxin; PF10417|1-cysPrx_C;	NA	NA	NA	GO:0003824|catalytic activity; GO:0051920|peroxiredoxin activity; GO:0055114|oxidation-reduction process; GO:0003674|molecular_function; GO:0016491|oxidoreductase activity; GO:0008150|biological_process; GO:0016684|oxidoreductase activity, acting on peroxide as acceptor; GO:0016209|antioxidant activity; GO:0008152|metabolic process;	NA	NA	NA	Ophio5|4439	0.94	423.705	9.3e-154	0.9954	1832.15	212.878	399.526	PF00578.16|AhpC-TSA;PF10417.4|1-cysPrx_C;PF08534.5|Redoxin	GO:0016209|antioxidant activity;GO:0016491|oxidoreductase activity;GO:0051920|peroxiredoxin activity;GO:0055114|oxidation-reduction process	NA	NA	NA	NA	NA	NA	NA	Down	0.000285532	Yes	Down	0.000285532	Yes	Up	0.00666187	No
Ophcf2|00003	scaffold_01:13446-14168	Alive	Dead	OK	408.053	383.321	-0.0902041	-0.194088	0.6626	0.768361	no	Mitochondrial peroxiredoxin PRX1	PF00578|AhpC-TSA; PF08534|Redoxin; PF10417|1-cysPrx_C;	NA	NA	NA	GO:0003824|catalytic activity; GO:0051920|peroxiredoxin activity; GO:0055114|oxidation-reduction process; GO:0003674|molecular_function; GO:0016491|oxidoreductase activity; GO:0008150|biological_process; GO:0016684|oxidoreductase activity, acting on peroxide as acceptor; GO:0016209|antioxidant activity; GO:0008152|metabolic process;	NA	NA	NA	Ophio5|4439	0.94	423.705	9.3e-154	0.9954	1832.15	212.878	399.526	PF00578.16|AhpC-TSA;PF10417.4|1-cysPrx_C;PF08534.5|Redoxin	GO:0016209|antioxidant activity;GO:0016491|oxidoreductase activity;GO:0051920|peroxiredoxin activity;GO:0055114|oxidation-reduction process	NA	NA	NA	NA	NA	NA	NA	Down	0.000285532	Yes	Down	0.000285532	Yes	Up	0.00666187	No
Ophcf2|00004	scaffold_01:14959-17524	Dead	Fungus	OK	105.582	38.3801	-1.45993	-3.12977	5e-05	0.000237974	yes	Lipase 4	PF01734|Patatin; PF11815|DUF3336;	NA	NA	NA	GO:0016298|lipase activity; GO:0003824|catalytic activity; GO:0016787|hydrolase activity; GO:0052689|carboxylic ester hydrolase activity; GO:0003674|molecular_function; GO:0004806|triglyceride lipase activity; GO:0016788|hydrolase activity, acting on ester bonds; GO:0008150|biological_process; GO:0071704|organic substance metabolic process; GO:0006629|lipid metabolic process; GO:0044238|primary m…	NA	NA	NA	Ophio5|4440	0.721	1095.88	0	0.993	52.7709	37.233	36.0178	PF11815.3|DUF3336;PF01734.17|Patatin	GO:0006629|lipid metabolic process	NA	NA	NA	NA	NA	NA	NA	Down	0.126893	No	Down	0.0912053	No	Down	0.909773	No
Ophcf2|00004	scaffold_01:14959-17524	Alive	Dead	OK	120.127	105.582	-0.186201	-0.364536	0.40425	0.541864	no	Lipase 4	PF01734|Patatin; PF11815|DUF3336;	NA	NA	NA	GO:0016298|lipase activity; GO:0003824|catalytic activity; GO:0016787|hydrolase activity; GO:0052689|carboxylic ester hydrolase activity; GO:0003674|molecular_function; GO:0004806|triglyceride lipase activity; GO:0016788|hydrolase activity, acting on ester bonds; GO:0008150|biological_process; GO:0071704|organic substance metabolic process; GO:0006629|lipid metabolic process; GO:0044238|primary m…	NA	NA	NA	Ophio5|4440	0.721	1095.88	0	0.993	52.7709	37.233	36.0178	PF11815.3|DUF3336;PF01734.17|Patatin	GO:0006629|lipid metabolic process	NA	NA	NA	NA	NA	NA	NA	Down	0.126893	No	Down	0.0912053	No	Down	0.909773	No
Ophcf2|00004	scaffold_01:14959-17524	Alive	Fungus	OK	120.127	38.3801	-1.64614	-3.42778	5e-05	0.000237974	yes	Lipase 4	PF01734|Patatin; PF11815|DUF3336;	NA	NA	NA	GO:0016298|lipase activity; GO:0003824|catalytic activity; GO:0016787|hydrolase activity; GO:0052689|carboxylic ester hydrolase activity; GO:0003674|molecular_function; GO:0004806|triglyceride lipase activity; GO:0016788|hydrolase activity, acting on ester bonds; GO:0008150|biological_process; GO:0071704|organic substance metabolic process; GO:0006629|lipid metabolic process; GO:0044238|primary m…	NA	NA	NA	Ophio5|4440	0.721	1095.88	0	0.993	52.7709	37.233	36.0178	PF11815.3|DUF3336;PF01734.17|Patatin	GO:0006629|lipid metabolic process	NA	NA	NA	NA	NA	NA	NA	Down	0.126893	No	Down	0.0912053	No	Down	0.909773	No
Ophcf2|00005	scaffold_01:19118-20048	Alive	Fungus	OK	104.029	60.0589	-0.792536	-1.65094	0.0016	0.00543325	yes	NmrA-domain-containing protein	PF05368|NmrA; PF13460|NAD_binding_10; PF01073|3Beta_HSD;	NA	NA	NA	GO:0006694|steroid biosynthetic process; GO:0016614|oxidoreductase activity, acting on CH-OH group of donors; GO:0003674|molecular_function; GO:0071704|organic substance metabolic process; GO:0006629|lipid metabolic process; GO:0003854|3-beta-hydroxy-delta5-steroid dehydrogenase activity; GO:0016229|steroid dehydrogenase activity; GO:0055114|oxidation-reduction process; GO:0003824|catalytic activ…	NA	NA	NA	Ophio5|4441	0.793	499.975	0	0.9968	6.00676	3.09417	4.09279	PF05368.8|NmrA;PF13460.1|NAD_binding_10;PF01073.14|3Beta_HSD	GO:0003854|3-beta-hydroxy-delta5-steroid dehydrogenase activity;GO:0055114|oxidation-reduction process;GO:0006694|steroid biosynthetic process;GO:0016616|oxidoreductase activity, acting on the CH-OH group of donors, NAD or NADP as acceptor	NA	NA	NA	NA	NA	NA	NA	Down	0.0877451	No	Down	0.345239	No	Up	0.537173	No
Ophcf2|00005	scaffold_01:19118-20048	Dead	Fungus	OK	72.3604	60.0589	-0.268822	-0.585527	0.2637	0.391601	no	NmrA-domain-containing protein	PF05368|NmrA; PF13460|NAD_binding_10; PF01073|3Beta_HSD;	NA	NA	NA	GO:0006694|steroid biosynthetic process; GO:0016614|oxidoreductase activity, acting on CH-OH group of donors; GO:0003674|molecular_function; GO:0071704|organic substance metabolic process; GO:0006629|lipid metabolic process; GO:0003854|3-beta-hydroxy-delta5-steroid dehydrogenase activity; GO:0016229|steroid dehydrogenase activity; GO:0055114|oxidation-reduction process; GO:0003824|catalytic activ…	NA	NA	NA	Ophio5|4441	0.793	499.975	0	0.9968	6.00676	3.09417	4.09279	PF05368.8|NmrA;PF13460.1|NAD_binding_10;PF01073.14|3Beta_HSD	GO:0003854|3-beta-hydroxy-delta5-steroid dehydrogenase activity;GO:0055114|oxidation-reduction process;GO:0006694|steroid biosynthetic process;GO:0016616|oxidoreductase activity, acting on the CH-OH group of donors, NAD or NADP as acceptor	NA	NA	NA	NA	NA	NA	NA	Down	0.0877451	No	Down	0.345239	No	Up	0.537173	No
Ophcf2|00005	scaffold_01:19118-20048	Alive	Dead	OK	104.029	72.3604	-0.523715	-1.10713	0.01365	0.0352232	yes	NmrA-domain-containing protein	PF05368|NmrA; PF13460|NAD_binding_10; PF01073|3Beta_HSD;	NA	NA	NA	GO:0006694|steroid biosynthetic process; GO:0016614|oxidoreductase activity, acting on CH-OH group of donors; GO:0003674|molecular_function; GO:0071704|organic substance metabolic process; GO:0006629|lipid metabolic process; GO:0003854|3-beta-hydroxy-delta5-steroid dehydrogenase activity; GO:0016229|steroid dehydrogenase activity; GO:0055114|oxidation-reduction process; GO:0003824|catalytic activ…	NA	NA	NA	Ophio5|4441	0.793	499.975	0	0.9968	6.00676	3.09417	4.09279	PF05368.8|NmrA;PF13460.1|NAD_binding_10;PF01073.14|3Beta_HSD	GO:0003854|3-beta-hydroxy-delta5-steroid dehydrogenase activity;GO:0055114|oxidation-reduction process;GO:0006694|steroid biosynthetic process;GO:0016616|oxidoreductase activity, acting on the CH-OH group of donors, NAD or NADP as acceptor	NA	NA	NA	NA	NA	NA	NA	Down	0.0877451	No	Down	0.345239	No	Up	0.537173	No
Ophcf2|00006	scaffold_01:20603-23396	Alive	Fungus	OK	122.39	309.916	1.34039	2.28066	5e-05	0.000237974	yes	aminopeptidase 2	PF17900|Peptidase_M1_N; PF01433|Peptidase_M1; PF11838|ERAP1_C;	NA	NA	NA	GO:0003824|catalytic activity; GO:0140096|catalytic activity, acting on a protein; GO:0016787|hydrolase activity; GO:0005488|binding; GO:0008270|zinc ion binding; GO:0046872|metal ion binding; GO:0003674|molecular_function; GO:0008233|peptidase activity; GO:0043167|ion binding; GO:0043169|cation binding; GO:0046914|transition metal ion binding; GO:0070011|peptidase activity, acting on L-amino aci…	NA	MER001010 - Aap1' aminopeptidase (Saccharomyces cerevisiae) [M01.007]#M01#; MER001009 - Ape2 aminopeptidase (Saccharomyces cerevisiae) [M01.006]#M01#; MER135234 - Ape2 aminopeptidase (Batrachochytrium dendrobatidis) [M01.006]#M01#; MER091649 - cytosol alanyl aminopeptidase (Oryza sativa) [M01.010]#M01#; MER136168 - cytosol alanyl aminopeptidase (Leptospirillum ferriphilum) [M01.010]#M01#; MER1435…	NA	Ophio5|4442	0.907	1682.54	0	0.9989	231.774	119.084	132.689	PF01433.15|Peptidase_M1;PF11838.3|ERAP1_C;PF13485.1|Peptidase_MA_2	GO:0008237|metallopeptidase activity;GO:0008270|zinc ion binding	NA	NA	NA	NA	M01	NA	NA	Down	0.015937	No	Down	0.0446509	No	Up	0.7363	No
Ophcf2|00006	scaffold_01:20603-23396	Dead	Fungus	OK	157.697	309.916	0.974724	1.77807	0.00075	0.00279259	yes	aminopeptidase 2	PF17900|Peptidase_M1_N; PF01433|Peptidase_M1; PF11838|ERAP1_C;	NA	NA	NA	GO:0003824|catalytic activity; GO:0140096|catalytic activity, acting on a protein; GO:0016787|hydrolase activity; GO:0005488|binding; GO:0008270|zinc ion binding; GO:0046872|metal ion binding; GO:0003674|molecular_function; GO:0008233|peptidase activity; GO:0043167|ion binding; GO:0043169|cation binding; GO:0046914|transition metal ion binding; GO:0070011|peptidase activity, acting on L-amino aci…	NA	MER001010 - Aap1' aminopeptidase (Saccharomyces cerevisiae) [M01.007]#M01#; MER001009 - Ape2 aminopeptidase (Saccharomyces cerevisiae) [M01.006]#M01#; MER135234 - Ape2 aminopeptidase (Batrachochytrium dendrobatidis) [M01.006]#M01#; MER091649 - cytosol alanyl aminopeptidase (Oryza sativa) [M01.010]#M01#; MER136168 - cytosol alanyl aminopeptidase (Leptospirillum ferriphilum) [M01.010]#M01#; MER1435…	NA	Ophio5|4442	0.907	1682.54	0	0.9989	231.774	119.084	132.689	PF01433.15|Peptidase_M1;PF11838.3|ERAP1_C;PF13485.1|Peptidase_MA_2	GO:0008237|metallopeptidase activity;GO:0008270|zinc ion binding	NA	NA	NA	NA	M01	NA	NA	Down	0.015937	No	Down	0.0446509	No	Up	0.7363	No
Ophcf2|00006	scaffold_01:20603-23396	Alive	Dead	OK	122.39	157.697	0.365664	0.652641	0.141	0.240368	no	aminopeptidase 2	PF17900|Peptidase_M1_N; PF01433|Peptidase_M1; PF11838|ERAP1_C;	NA	NA	NA	GO:0003824|catalytic activity; GO:0140096|catalytic activity, acting on a protein; GO:0016787|hydrolase activity; GO:0005488|binding; GO:0008270|zinc ion binding; GO:0046872|metal ion binding; GO:0003674|molecular_function; GO:0008233|peptidase activity; GO:0043167|ion binding; GO:0043169|cation binding; GO:0046914|transition metal ion binding; GO:0070011|peptidase activity, acting on L-amino aci…	NA	MER001010 - Aap1' aminopeptidase (Saccharomyces cerevisiae) [M01.007]#M01#; MER001009 - Ape2 aminopeptidase (Saccharomyces cerevisiae) [M01.006]#M01#; MER135234 - Ape2 aminopeptidase (Batrachochytrium dendrobatidis) [M01.006]#M01#; MER091649 - cytosol alanyl aminopeptidase (Oryza sativa) [M01.010]#M01#; MER136168 - cytosol alanyl aminopeptidase (Leptospirillum ferriphilum) [M01.010]#M01#; MER1435…	NA	Ophio5|4442	0.907	1682.54	0	0.9989	231.774	119.084	132.689	PF01433.15|Peptidase_M1;PF11838.3|ERAP1_C;PF13485.1|Peptidase_MA_2	GO:0008237|metallopeptidase activity;GO:0008270|zinc ion binding	NA	NA	NA	NA	M01	NA	NA	Down	0.015937	No	Down	0.0446509	No	Up	0.7363	No
Ophcf2|00007	scaffold_01:24489-25518	Alive	Dead	OK	25.3677	27.3572	0.108928	0.195617	0.6558	0.762854	no	NACHT and WD40 domain protein	NA	NA	NA	NA	NA	NA	NA	NA	Ophio5|4443	0.78	494.197	5.74e-178	0.9942	7.15757	17.5442	13.9568	NA	NA	NA	NA	NA	NA	NA	NA	NA	Up	0.00549944	Yes	Up	0.0449582	No	Down	0.499987	No
Ophcf2|00007	scaffold_01:24489-25518	Alive	Fungus	OK	25.3677	33.4861	0.400574	0.738803	0.14265	0.242204	no	NACHT and WD40 domain protein	NA	NA	NA	NA	NA	NA	NA	NA	Ophio5|4443	0.78	494.197	5.74e-178	0.9942	7.15757	17.5442	13.9568	NA	NA	NA	NA	NA	NA	NA	NA	NA	Up	0.00549944	Yes	Up	0.0449582	No	Down	0.499987	No
Ophcf2|00007	scaffold_01:24489-25518	Dead	Fungus	OK	27.3572	33.4861	0.291646	0.552043	0.2802	0.40984	no	NACHT and WD40 domain protein	NA	NA	NA	NA	NA	NA	NA	NA	Ophio5|4443	0.78	494.197	5.74e-178	0.9942	7.15757	17.5442	13.9568	NA	NA	NA	NA	NA	NA	NA	NA	NA	Up	0.00549944	Yes	Up	0.0449582	No	Down	0.499987	No
Ophcf2|00008	scaffold_01:26914-28263	Alive	Fungus	OK	200.086	197.179	-0.0211143	-0.0368348	0.9412	0.962941	no	fasciclin domain-containing protein	PF02469|Fasciclin;	Has signal peptide;	NA	NA	NA	NA	NA	NA	Ophio5|4444	0.909	777.704	0	0.9977	257.222	248.391	164.23	PF02469.17|Fasciclin;PF02469.17|Fasciclin	NA	NA	SignalP: has predicted secretion signal	NA	NA	NA	NA	NA	Down	0.919176	No	Down	0.0632921	No	Down	0.110694	No
Ophcf2|00008	scaffold_01:26914-28263	Dead	Fungus	OK	161.043	197.179	0.292057	0.6224	0.21585	0.335874	no	fasciclin domain-containing protein	PF02469|Fasciclin;	Has signal peptide;	NA	NA	NA	NA	NA	NA	Ophio5|4444	0.909	777.704	0	0.9977	257.222	248.391	164.23	PF02469.17|Fasciclin;PF02469.17|Fasciclin	NA	NA	SignalP: has predicted secretion signal	NA	NA	NA	NA	NA	Down	0.919176	No	Down	0.0632921	No	Down	0.110694	No
Ophcf2|00008	scaffold_01:26914-28263	Alive	Dead	OK	200.086	161.043	-0.313171	-0.549079	0.2042	0.321785	no	fasciclin domain-containing protein	PF02469|Fasciclin;	Has signal peptide;	NA	NA	NA	NA	NA	NA	Ophio5|4444	0.909	777.704	0	0.9977	257.222	248.391	164.23	PF02469.17|Fasciclin;PF02469.17|Fasciclin	NA	NA	SignalP: has predicted secretion signal	NA	NA	NA	NA	NA	Down	0.919176	No	Down	0.0632921	No	Down	0.110694	No
Ophcf2|00009	scaffold_01:31511-33649	Dead	Fungus	OK	77.1387	6.90086	-3.48261	-6.38027	5e-05	0.000237974	yes	C6 transcription factor	PF11951|Fungal_trans_2;	NA	NA	Fungal Specific TF;	NA	NA	NA	1;	Ophio5|6920	0.752	663.685	0	0.8049	0.266561	6.50252	8.40722	PF11951.3|Fungal_trans_2	NA	NA	NA	NA	NA	NA	NA	NA	Up	0.00121735	Yes	Up	0.00121735	Yes	Up	0.44992	No
Ophcf2|00009	scaffold_01:31511-33649	Alive	Fungus	OK	78.4742	6.90086	-3.50737	-6.33205	5e-05	0.000237974	yes	C6 transcription factor	PF11951|Fungal_trans_2;	NA	NA	Fungal Specific TF;	NA	NA	NA	1;	Ophio5|6920	0.752	663.685	0	0.8049	0.266561	6.50252	8.40722	PF11951.3|Fungal_trans_2	NA	NA	NA	NA	NA	NA	NA	NA	Up	0.00121735	Yes	Up	0.00121735	Yes	Up	0.44992	No
Ophcf2|00009	scaffold_01:31511-33649	Alive	Dead	OK	78.4742	77.1387	-0.0247637	-0.054768	0.90115	0.937033	no	C6 transcription factor	PF11951|Fungal_trans_2;	NA	NA	Fungal Specific TF;	NA	NA	NA	1;	Ophio5|6920	0.752	663.685	0	0.8049	0.266561	6.50252	8.40722	PF11951.3|Fungal_trans_2	NA	NA	NA	NA	NA	NA	NA	NA	Up	0.00121735	Yes	Up	0.00121735	Yes	Up	0.44992	No
Ophcf2|00010	scaffold_01:33734-35358	Alive	Dead	OK	75.6079	68.0491	-0.151961	-0.343771	0.43315	0.57008	no	Pantothenate transporter liz1	PF06779|MFS_4; PF07690|MFS_1;	NA	NA	NA	GO:0051234|establishment of localization; GO:0005575|cellular_component; GO:0044425|membrane part; GO:0016021|integral component of membrane; GO:0006810|transport; GO:0008150|biological_process; GO:0031224|intrinsic component of membrane; GO:0051179|localization; GO:0055085|transmembrane transport;	NA	NA	9;	Ophio5|6921	0.832	741.11	0	0.9272	2.02938	19.404	8.34956	PF07690.11|MFS_1	GO:0016021|integral component of membrane;GO:0055085|transmembrane transport	NA	NA	NA	10	NA	NA	NA	Up	0.000285532	Yes	Up	0.000770107	Yes	Down	0.00411343	Yes
Ophcf2|00010	scaffold_01:33734-35358	Alive	Fungus	OK	75.6079	106.793	0.498201	1.11835	0.0279	0.064426	no	Pantothenate transporter liz1	PF06779|MFS_4; PF07690|MFS_1;	NA	NA	NA	GO:0051234|establishment of localization; GO:0005575|cellular_component; GO:0044425|membrane part; GO:0016021|integral component of membrane; GO:0006810|transport; GO:0008150|biological_process; GO:0031224|intrinsic component of membrane; GO:0051179|localization; GO:0055085|transmembrane transport;	NA	NA	9;	Ophio5|6921	0.832	741.11	0	0.9272	2.02938	19.404	8.34956	PF07690.11|MFS_1	GO:0016021|integral component of membrane;GO:0055085|transmembrane transport	NA	NA	NA	10	NA	NA	NA	Up	0.000285532	Yes	Up	0.000770107	Yes	Down	0.00411343	Yes
Ophcf2|00010	scaffold_01:33734-35358	Dead	Fungus	OK	68.0491	106.793	0.650162	1.47788	0.0032	0.00998756	yes	Pantothenate transporter liz1	PF06779|MFS_4; PF07690|MFS_1;	NA	NA	NA	GO:0051234|establishment of localization; GO:0005575|cellular_component; GO:0044425|membrane part; GO:0016021|integral component of membrane; GO:0006810|transport; GO:0008150|biological_process; GO:0031224|intrinsic component of membrane; GO:0051179|localization; GO:0055085|transmembrane transport;	NA	NA	9;	Ophio5|6921	0.832	741.11	0	0.9272	2.02938	19.404	8.34956	PF07690.11|MFS_1	GO:0016021|integral component of membrane;GO:0055085|transmembrane transport	NA	NA	NA	10	NA	NA	NA	Up	0.000285532	Yes	Up	0.000770107	Yes	Down	0.00411343	Yes
Ophcf2|00011	scaffold_01:35682-37482	Alive	Fungus	OK	62.6886	71.8021	0.195823	0.441527	0.3813	0.518316	no	Acetamidase	PF01425|Amidase;	NA	NA	NA	NA	NA	NA	NA	Ophio5|5995	0.765	841.262	0	0.98	2.12586	23.7973	6.70662	PF01425.16|Amidase	GO:0016884|carbon-nitrogen ligase activity, with glutamine as amido-N-donor	NA	NA	NA	NA	NA	NA	NA	Up	0.000285532	Yes	Up	0.00143681	Yes	Down	0.000285532	Yes
Ophcf2|00011	scaffold_01:35682-37482	Dead	Fungus	OK	53.2695	71.8021	0.430716	0.982443	0.0549	0.112534	no	Acetamidase	PF01425|Amidase;	NA	NA	NA	NA	NA	NA	NA	Ophio5|5995	0.765	841.262	0	0.98	2.12586	23.7973	6.70662	PF01425.16|Amidase	GO:0016884|carbon-nitrogen ligase activity, with glutamine as amido-N-donor	NA	NA	NA	NA	NA	NA	NA	Up	0.000285532	Yes	Up	0.00143681	Yes	Down	0.000285532	Yes
Ophcf2|00011	scaffold_01:35682-37482	Alive	Dead	OK	62.6886	53.2695	-0.234894	-0.526687	0.2369	0.36082	no	Acetamidase	PF01425|Amidase;	NA	NA	NA	NA	NA	NA	NA	Ophio5|5995	0.765	841.262	0	0.98	2.12586	23.7973	6.70662	PF01425.16|Amidase	GO:0016884|carbon-nitrogen ligase activity, with glutamine as amido-N-donor	NA	NA	NA	NA	NA	NA	NA	Up	0.000285532	Yes	Up	0.00143681	Yes	Down	0.000285532	Yes
Ophcf2|00012	scaffold_01:38317-40364	Alive	Dead	OK	0.804846	0.50265	-0.679158	-0.597278	0.17875	0.289549	no	peptidase S33, tripeptidyl-peptidase	PF00561|Abhydrolase_1; PF08386|Abhydrolase_4;	Has signal peptide;	NA	NA	NA	NA	MER000440 - tripeptidyl-peptidase B (Streptomyces lividans) [S33.006]#S33#; MER000441 - tripeptidyl-peptidase C (Streptomyces lividans) [S33.007]#S33#; MER000439 - tripeptidyl-peptidase A (Streptomyces lividans) [S33.002]#S33#;	NA	Ophio5|5996	0.669	626.32	0	0.8384	0.0165748	0	0.107492	PF08386.5|Abhydrolase_4;PF00561.15|Abhydrolase_1;PF12697.2|Abhydrolase_6	NA	NA	SignalP: has predicted secretion signal	NA	NA	S33	NA	NA	Down	1	No	Up	1	No	Up	1	No
Ophcf2|00012	scaffold_01:38317-40364	Alive	Fungus	OK	0.804846	1.42475	0.823924	0.830096	0.11635	0.206591	no	peptidase S33, tripeptidyl-peptidase	PF00561|Abhydrolase_1; PF08386|Abhydrolase_4;	Has signal peptide;	NA	NA	NA	NA	MER000440 - tripeptidyl-peptidase B (Streptomyces lividans) [S33.006]#S33#; MER000441 - tripeptidyl-peptidase C (Streptomyces lividans) [S33.007]#S33#; MER000439 - tripeptidyl-peptidase A (Streptomyces lividans) [S33.002]#S33#;	NA	Ophio5|5996	0.669	626.32	0	0.8384	0.0165748	0	0.107492	PF08386.5|Abhydrolase_4;PF00561.15|Abhydrolase_1;PF12697.2|Abhydrolase_6	NA	NA	SignalP: has predicted secretion signal	NA	NA	S33	NA	NA	Down	1	No	Up	1	No	Up	1	No
Ophcf2|00012	scaffold_01:38317-40364	Dead	Fungus	OK	0.50265	1.42475	1.50308	1.47471	0.0086	0.0237154	yes	peptidase S33, tripeptidyl-peptidase	PF00561|Abhydrolase_1; PF08386|Abhydrolase_4;	Has signal peptide;	NA	NA	NA	NA	MER000440 - tripeptidyl-peptidase B (Streptomyces lividans) [S33.006]#S33#; MER000441 - tripeptidyl-peptidase C (Streptomyces lividans) [S33.007]#S33#; MER000439 - tripeptidyl-peptidase A (Streptomyces lividans) [S33.002]#S33#;	NA	Ophio5|5996	0.669	626.32	0	0.8384	0.0165748	0	0.107492	PF08386.5|Abhydrolase_4;PF00561.15|Abhydrolase_1;PF12697.2|Abhydrolase_6	NA	NA	SignalP: has predicted secretion signal	NA	NA	S33	NA	NA	Down	1	No	Up	1	No	Up	1	No
Ophcf2|00013	scaffold_01:42052-43468	Alive	Dead	OK	2.37535	14.1566	2.57526	3.35253	5e-05	0.000237974	yes	GATA zinc finger domain-containing protein 14-like	NA	Has signal peptide;	NA	NA	NA	NA	NA	NA	Ophio5|5997	0.477	162.54	3.81e-46	0.5784	0.412083	0	0	NA	NA	NA	SignalP: has predicted secretion signal	NA	NA	NA	NA	NA	Down	1	No	Down	1	No	=	1	No
Ophcf2|00013	scaffold_01:42052-43468	Alive	Fungus	OK	2.37535	0.328653	-2.8535	-2.5843	0.00025	0.00104284	yes	GATA zinc finger domain-containing protein 14-like	NA	Has signal peptide;	NA	NA	NA	NA	NA	NA	Ophio5|5997	0.477	162.54	3.81e-46	0.5784	0.412083	0	0	NA	NA	NA	SignalP: has predicted secretion signal	NA	NA	NA	NA	NA	Down	1	No	Down	1	No	=	1	No
Ophcf2|00013	scaffold_01:42052-43468	Dead	Fungus	OK	14.1566	0.328653	-5.42876	-5.27747	5e-05	0.000237974	yes	GATA zinc finger domain-containing protein 14-like	NA	Has signal peptide;	NA	NA	NA	NA	NA	NA	Ophio5|5997	0.477	162.54	3.81e-46	0.5784	0.412083	0	0	NA	NA	NA	SignalP: has predicted secretion signal	NA	NA	NA	NA	NA	Down	1	No	Down	1	No	=	1	No
Ophcf2|00014	scaffold_01:43933-46756	Dead	Fungus	OK	17.8931	143.437	3.00294	6.02149	5e-05	0.000237974	yes	sulfatase domain protein	PF00884|Sulfatase;	NA	NA	NA	GO:0003824|catalytic activity; GO:0016787|hydrolase activity; GO:0003674|molecular_function; GO:0016788|hydrolase activity, acting on ester bonds; GO:0008484|sulfuric ester hydrolase activity;	NA	NA	5;	Ophio5|5998	0.674	1165.21	0	0.9681	74.9699	7.87387	10.8622	PF00884.18|Sulfatase;PF01663.17|Phosphodiest	GO:0003824|catalytic activity;GO:0008484|sulfuric ester hydrolase activity;GO:0008152|metabolic process	NA	NA	NA	5	NA	NA	NA	Down	0.000285532	Yes	Down	0.000285532	Yes	Up	0.283518	No
Ophcf2|00014	scaffold_01:43933-46756	Alive	Fungus	OK	18.4245	143.437	2.96072	5.69037	5e-05	0.000237974	yes	sulfatase domain protein	PF00884|Sulfatase;	NA	NA	NA	GO:0003824|catalytic activity; GO:0016787|hydrolase activity; GO:0003674|molecular_function; GO:0016788|hydrolase activity, acting on ester bonds; GO:0008484|sulfuric ester hydrolase activity;	NA	NA	5;	Ophio5|5998	0.674	1165.21	0	0.9681	74.9699	7.87387	10.8622	PF00884.18|Sulfatase;PF01663.17|Phosphodiest	GO:0003824|catalytic activity;GO:0008484|sulfuric ester hydrolase activity;GO:0008152|metabolic process	NA	NA	NA	5	NA	NA	NA	Down	0.000285532	Yes	Down	0.000285532	Yes	Up	0.283518	No
Ophcf2|00014	scaffold_01:43933-46756	Alive	Dead	OK	18.4245	17.8931	-0.0422171	-0.084096	0.85255	0.905173	no	sulfatase domain protein	PF00884|Sulfatase;	NA	NA	NA	GO:0003824|catalytic activity; GO:0016787|hydrolase activity; GO:0003674|molecular_function; GO:0016788|hydrolase activity, acting on ester bonds; GO:0008484|sulfuric ester hydrolase activity;	NA	NA	5;	Ophio5|5998	0.674	1165.21	0	0.9681	74.9699	7.87387	10.8622	PF00884.18|Sulfatase;PF01663.17|Phosphodiest	GO:0003824|catalytic activity;GO:0008484|sulfuric ester hydrolase activity;GO:0008152|metabolic process	NA	NA	NA	5	NA	NA	NA	Down	0.000285532	Yes	Down	0.000285532	Yes	Up	0.283518	No
Ophcf2|00015	scaffold_01:48340-50432	Alive	Fungus	OK	90.8822	118.168	0.378771	0.805223	0.11135	0.199503	no	Baeyer-Villiger monooxygenase	PF00743|FMO-like; PF13450|NAD_binding_8; PF13434|K_oxygenase; PF07992|Pyr_redox_2;	NA	NA	NA	GO:0097159|organic cyclic compound binding; GO:0003674|molecular_function; GO:0005488|binding; GO:0055114|oxidation-reduction process; GO:0048037|cofactor binding; GO:0016705|oxidoreductase activity, acting on paired donors, with incorporation or reduction of molecular oxygen; GO:0050662|coenzyme binding; GO:0043167|ion binding; GO:0050660|flavin adenine dinucleotide binding; GO:0000166|nucleotid…	NA	NA	NA	Ophio5|4092	0.721	857.44	0	0.9809	27.1075	1265.29	377.996	PF13738.1|Pyr_redox_3;PF00743.14|FMO-like;PF13450.1|NAD_binding_8;PF13434.1|K_oxygenase;PF07992.9|Pyr_redox_2	GO:0004499|N,N-dimethylaniline monooxygenase activity;GO:0016491|oxidoreductase activity;GO:0055114|oxidation-reduction process;GO:0050661|NADP binding;GO:0050660|flavin adenine dinucleotide binding	NA	NA	NA	NA	NA	NA	NA	Up	0.000285532	Yes	Up	0.000285532	Yes	Down	0.000285532	Yes
Ophcf2|00015	scaffold_01:48340-50432	Dead	Fungus	OK	147.515	118.168	-0.320022	-0.528267	0.28045	0.41015	no	Baeyer-Villiger monooxygenase	PF00743|FMO-like; PF13450|NAD_binding_8; PF13434|K_oxygenase; PF07992|Pyr_redox_2;	NA	NA	NA	GO:0097159|organic cyclic compound binding; GO:0003674|molecular_function; GO:0005488|binding; GO:0055114|oxidation-reduction process; GO:0048037|cofactor binding; GO:0016705|oxidoreductase activity, acting on paired donors, with incorporation or reduction of molecular oxygen; GO:0050662|coenzyme binding; GO:0043167|ion binding; GO:0050660|flavin adenine dinucleotide binding; GO:0000166|nucleotid…	NA	NA	NA	Ophio5|4092	0.721	857.44	0	0.9809	27.1075	1265.29	377.996	PF13738.1|Pyr_redox_3;PF00743.14|FMO-like;PF13450.1|NAD_binding_8;PF13434.1|K_oxygenase;PF07992.9|Pyr_redox_2	GO:0004499|N,N-dimethylaniline monooxygenase activity;GO:0016491|oxidoreductase activity;GO:0055114|oxidation-reduction process;GO:0050661|NADP binding;GO:0050660|flavin adenine dinucleotide binding	NA	NA	NA	NA	NA	NA	NA	Up	0.000285532	Yes	Up	0.000285532	Yes	Down	0.000285532	Yes
Ophcf2|00015	scaffold_01:48340-50432	Alive	Dead	OK	90.8822	147.515	0.698793	1.1411	0.01355	0.0350112	yes	Baeyer-Villiger monooxygenase	PF00743|FMO-like; PF13450|NAD_binding_8; PF13434|K_oxygenase; PF07992|Pyr_redox_2;	NA	NA	NA	GO:0097159|organic cyclic compound binding; GO:0003674|molecular_function; GO:0005488|binding; GO:0055114|oxidation-reduction process; GO:0048037|cofactor binding; GO:0016705|oxidoreductase activity, acting on paired donors, with incorporation or reduction of molecular oxygen; GO:0050662|coenzyme binding; GO:0043167|ion binding; GO:0050660|flavin adenine dinucleotide binding; GO:0000166|nucleotid…	NA	NA	NA	Ophio5|4092	0.721	857.44	0	0.9809	27.1075	1265.29	377.996	PF13738.1|Pyr_redox_3;PF00743.14|FMO-like;PF13450.1|NAD_binding_8;PF13434.1|K_oxygenase;PF07992.9|Pyr_redox_2	GO:0004499|N,N-dimethylaniline monooxygenase activity;GO:0016491|oxidoreductase activity;GO:0055114|oxidation-reduction process;GO:0050661|NADP binding;GO:0050660|flavin adenine dinucleotide binding	NA	NA	NA	NA	NA	NA	NA	Up	0.000285532	Yes	Up	0.000285532	Yes	Down	0.000285532	Yes
Ophcf2|00016	scaffold_01:51468-53345	Dead	Fungus	OK	2579.28	4606.4	0.83667	1.08806	0.0381	0.0834247	no	hexose transporter-like protein	PF07690|MFS_1; PF00083|Sugar_tr;	NA	NA	NA	GO:0022857|transmembrane transporter activity; GO:0051234|establishment of localization; GO:0005575|cellular_component; GO:0044425|membrane part; GO:0003674|molecular_function; GO:0006810|transport; GO:0008150|biological_process; GO:0031224|intrinsic component of membrane; GO:0016021|integral component of membrane; GO:0051179|localization; GO:0005215|transporter activity; GO:0055085|transmembrane…	NA	NA	12;	Ophio5|4091	0.913	945.266	0	0.9981	1062.97	2553.76	2083.99	PF00083.19|Sugar_tr;PF07690.11|MFS_1;PF03092.11|BT1	GO:0022857|transmembrane transporter activity;GO:0016021|integral component of membrane;GO:0055085|transmembrane transport	NA	NA	NA	12	NA	NA	NA	Up	0.0345746	Yes	Up	0.0649631	No	Down	0.68021	No
Ophcf2|00016	scaffold_01:51468-53345	Alive	Dead	OK	2077.14	2579.28	0.312373	0.419236	0.3415	0.477206	no	hexose transporter-like protein	PF07690|MFS_1; PF00083|Sugar_tr;	NA	NA	NA	GO:0022857|transmembrane transporter activity; GO:0051234|establishment of localization; GO:0005575|cellular_component; GO:0044425|membrane part; GO:0003674|molecular_function; GO:0006810|transport; GO:0008150|biological_process; GO:0031224|intrinsic component of membrane; GO:0016021|integral component of membrane; GO:0051179|localization; GO:0005215|transporter activity; GO:0055085|transmembrane…	NA	NA	12;	Ophio5|4091	0.913	945.266	0	0.9981	1062.97	2553.76	2083.99	PF00083.19|Sugar_tr;PF07690.11|MFS_1;PF03092.11|BT1	GO:0022857|transmembrane transporter activity;GO:0016021|integral component of membrane;GO:0055085|transmembrane transport	NA	NA	NA	12	NA	NA	NA	Up	0.0345746	Yes	Up	0.0649631	No	Down	0.68021	No
Ophcf2|00016	scaffold_01:51468-53345	Alive	Fungus	OK	2077.14	4606.4	1.14904	1.47116	0.00455	0.0136102	yes	hexose transporter-like protein	PF07690|MFS_1; PF00083|Sugar_tr;	NA	NA	NA	GO:0022857|transmembrane transporter activity; GO:0051234|establishment of localization; GO:0005575|cellular_component; GO:0044425|membrane part; GO:0003674|molecular_function; GO:0006810|transport; GO:0008150|biological_process; GO:0031224|intrinsic component of membrane; GO:0016021|integral component of membrane; GO:0051179|localization; GO:0005215|transporter activity; GO:0055085|transmembrane…	NA	NA	12;	Ophio5|4091	0.913	945.266	0	0.9981	1062.97	2553.76	2083.99	PF00083.19|Sugar_tr;PF07690.11|MFS_1;PF03092.11|BT1	GO:0022857|transmembrane transporter activity;GO:0016021|integral component of membrane;GO:0055085|transmembrane transport	NA	NA	NA	12	NA	NA	NA	Up	0.0345746	Yes	Up	0.0649631	No	Down	0.68021	No
Ophcf2|00017	scaffold_01:55940-56279	Alive	Fungus	OK	3.93421	0.434708	-3.17796	-1.35732	0.04395	0.0940291	no	hypothetical protein CDD80_2801	NA	Has signal peptide;	Small secreted protein;	NA	NA	NA	NA	NA	NA	NA	NA	NA	NA	NA	NA	NA	NA	NA	NA	NA	NA	NA	NA	NA	NA	NA	NA	NA	NA	NA	NA	NA	NA	NA
Ophcf2|00017	scaffold_01:55940-56279	Dead	Fungus	OK	2.44355	0.434708	-2.49086	-1.04894	0.05745	0.116729	no	hypothetical protein CDD80_2801	NA	Has signal peptide;	Small secreted protein;	NA	NA	NA	NA	NA	NA	NA	NA	NA	NA	NA	NA	NA	NA	NA	NA	NA	NA	NA	NA	NA	NA	NA	NA	NA	NA	NA	NA	NA	NA	NA
Ophcf2|00017	scaffold_01:55940-56279	Alive	Dead	OK	3.93421	2.44355	-0.687096	-0.524438	0.22295	0.344092	no	hypothetical protein CDD80_2801	NA	Has signal peptide;	Small secreted protein;	NA	NA	NA	NA	NA	NA	NA	NA	NA	NA	NA	NA	NA	NA	NA	NA	NA	NA	NA	NA	NA	NA	NA	NA	NA	NA	NA	NA	NA	NA	NA
Ophcf2|00018	scaffold_01:57240-58908	Dead	Fungus	OK	51.8011	16.4158	-1.6579	-3.41764	5e-05	0.000237974	yes	heat-labile enterotoxin subunit alpha	PF01375|Enterotoxin_a;	NA	NA	NA	GO:0044419|interspecies interaction between organisms; GO:0005575|cellular_component; GO:0003674|molecular_function; GO:0044421|extracellular region part; GO:0008150|biological_process; GO:0009405|pathogenesis; GO:0051704|multi-organism process; GO:0090729|toxin activity; GO:0005615|extracellular space;	NA	NA	NA	Ophio5|4090	0.503	516.153	1.76e-177	0.991	1.83248	1.48727	0.697353	PF01375.12|Enterotoxin_a	GO:0005576|extracellular region;GO:0009405|pathogenesis;GO:0003824|catalytic activity	NA	SignalP: has predicted secretion signal	NA	NA	NA	NA	NA	Down	0.654567	No	Down	0.0328031	No	Down	0.100613	No
Ophcf2|00018	scaffold_01:57240-58908	Alive	Fungus	OK	68.0762	16.4158	-2.05206	-4.20184	5e-05	0.000237974	yes	heat-labile enterotoxin subunit alpha	PF01375|Enterotoxin_a;	NA	NA	NA	GO:0044419|interspecies interaction between organisms; GO:0005575|cellular_component; GO:0003674|molecular_function; GO:0044421|extracellular region part; GO:0008150|biological_process; GO:0009405|pathogenesis; GO:0051704|multi-organism process; GO:0090729|toxin activity; GO:0005615|extracellular space;	NA	NA	NA	Ophio5|4090	0.503	516.153	1.76e-177	0.991	1.83248	1.48727	0.697353	PF01375.12|Enterotoxin_a	GO:0005576|extracellular region;GO:0009405|pathogenesis;GO:0003824|catalytic activity	NA	SignalP: has predicted secretion signal	NA	NA	NA	NA	NA	Down	0.654567	No	Down	0.0328031	No	Down	0.100613	No
Ophcf2|00018	scaffold_01:57240-58908	Alive	Dead	OK	68.0762	51.8011	-0.394166	-0.886503	0.044	0.0941081	no	heat-labile enterotoxin subunit alpha	PF01375|Enterotoxin_a;	NA	NA	NA	GO:0044419|interspecies interaction between organisms; GO:0005575|cellular_component; GO:0003674|molecular_function; GO:0044421|extracellular region part; GO:0008150|biological_process; GO:0009405|pathogenesis; GO:0051704|multi-organism process; GO:0090729|toxin activity; GO:0005615|extracellular space;	NA	NA	NA	Ophio5|4090	0.503	516.153	1.76e-177	0.991	1.83248	1.48727	0.697353	PF01375.12|Enterotoxin_a	GO:0005576|extracellular region;GO:0009405|pathogenesis;GO:0003824|catalytic activity	NA	SignalP: has predicted secretion signal	NA	NA	NA	NA	NA	Down	0.654567	No	Down	0.0328031	No	Down	0.100613	No
Ophcf2|00019	scaffold_01:59450-60518	Dead	Fungus	OK	260.492	2.6332	-6.62828	-9.09566	5e-05	0.000237974	yes	phospholipase D precursor	NA	Has signal peptide;	NA	NA	NA	NA	NA	NA	NA	NA	NA	NA	NA	NA	NA	NA	NA	NA	NA	NA	NA	NA	NA	NA	NA	NA	NA	NA	NA	NA	NA	NA	NA	NA
Ophcf2|00019	scaffold_01:59450-60518	Alive	Dead	OK	99.2757	260.492	1.39173	2.71359	5e-05	0.000237974	yes	phospholipase D precursor	NA	Has signal peptide;	NA	NA	NA	NA	NA	NA	NA	NA	NA	NA	NA	NA	NA	NA	NA	NA	NA	NA	NA	NA	NA	NA	NA	NA	NA	NA	NA	NA	NA	NA	NA	NA
Ophcf2|00019	scaffold_01:59450-60518	Alive	Fungus	OK	99.2757	2.6332	-5.23655	-7.23905	5e-05	0.000237974	yes	phospholipase D precursor	NA	Has signal peptide;	NA	NA	NA	NA	NA	NA	NA	NA	NA	NA	NA	NA	NA	NA	NA	NA	NA	NA	NA	NA	NA	NA	NA	NA	NA	NA	NA	NA	NA	NA	NA	NA
Ophcf2|00020	scaffold_01:60778-62020	Alive	Dead	NOTEST	0.207322	0.269306	0.377378	0	1	1	no	amidohydrolase	PF01979|Amidohydro_1;	Has signal peptide;	NA	NA	GO:0003824|catalytic activity; GO:0003674|molecular_function; GO:0016787|hydrolase activity;	NA	MER005900 - Pro-Hyp dipeptidase (Microbacterium esteraromaticum) [M38.002]#M38#;	NA	Ophio5|4078	0.682	553.518	0	0.9541	0.294254	0.491034	0.787258	PF13147.1|Amidohydro_4;PF13147.1|Amidohydro_4;PF01979.15|Amidohydro_1;PF01979.15|Amidohydro_1;PF13594.1|Amidohydro_5	GO:0016787|hydrolase activity	NA	SignalP: has predicted secretion signal	NA	NA	M38	NA	NA	Up	1	No	Up	1	No	Up	1	No
Ophcf2|00020	scaffold_01:60778-62020	Alive	Fungus	NOTEST	0.207322	0.0816261	-1.34477	0	1	1	no	amidohydrolase	PF01979|Amidohydro_1;	Has signal peptide;	NA	NA	GO:0003824|catalytic activity; GO:0003674|molecular_function; GO:0016787|hydrolase activity;	NA	MER005900 - Pro-Hyp dipeptidase (Microbacterium esteraromaticum) [M38.002]#M38#;	NA	Ophio5|4078	0.682	553.518	0	0.9541	0.294254	0.491034	0.787258	PF13147.1|Amidohydro_4;PF13147.1|Amidohydro_4;PF01979.15|Amidohydro_1;PF01979.15|Amidohydro_1;PF13594.1|Amidohydro_5	GO:0016787|hydrolase activity	NA	SignalP: has predicted secretion signal	NA	NA	M38	NA	NA	Up	1	No	Up	1	No	Up	1	No
Ophcf2|00020	scaffold_01:60778-62020	Dead	Fungus	NOTEST	0.269306	0.0816261	-1.72215	0	1	1	no	amidohydrolase	PF01979|Amidohydro_1;	Has signal peptide;	NA	NA	GO:0003824|catalytic activity; GO:0003674|molecular_function; GO:0016787|hydrolase activity;	NA	MER005900 - Pro-Hyp dipeptidase (Microbacterium esteraromaticum) [M38.002]#M38#;	NA	Ophio5|4078	0.682	553.518	0	0.9541	0.294254	0.491034	0.787258	PF13147.1|Amidohydro_4;PF13147.1|Amidohydro_4;PF01979.15|Amidohydro_1;PF01979.15|Amidohydro_1;PF13594.1|Amidohydro_5	GO:0016787|hydrolase activity	NA	SignalP: has predicted secretion signal	NA	NA	M38	NA	NA	Up	1	No	Up	1	No	Up	1	No
Ophcf2|00021	scaffold_01:63556-66910	Alive	Dead	OK	1.53263	1.72609	0.171496	0.200208	0.6462	0.754413	no	Serine/threonine-protein kinase domain protein	NA	NA	NA	NA	NA	NA	NA	NA	Ophio5|4079	0.571	716.842	0	0.8561	0.446401	0.275058	0.0831793	NA	NA	NA	NA	NA	NA	NA	NA	NA	Down	1	No	Down	1	No	Down	1	No
Ophcf2|00021	scaffold_01:63556-66910	Alive	Fungus	OK	1.53263	0.491024	-1.64215	-1.73264	0.0028	0.00888307	yes	Serine/threonine-protein kinase domain protein	NA	NA	NA	NA	NA	NA	NA	NA	Ophio5|4079	0.571	716.842	0	0.8561	0.446401	0.275058	0.0831793	NA	NA	NA	NA	NA	NA	NA	NA	NA	Down	1	No	Down	1	No	Down	1	No
Ophcf2|00021	scaffold_01:63556-66910	Dead	Fungus	OK	1.72609	0.491024	-1.81364	-1.91147	0.0012	0.00422113	yes	Serine/threonine-protein kinase domain protein	NA	NA	NA	NA	NA	NA	NA	NA	Ophio5|4079	0.571	716.842	0	0.8561	0.446401	0.275058	0.0831793	NA	NA	NA	NA	NA	NA	NA	NA	NA	Down	1	No	Down	1	No	Down	1	No
Ophcf2|00022	scaffold_01:67368-69027	Dead	Fungus	OK	6.84505	12.3858	0.855555	1.41019	0.0077	0.0215896	yes	alpha-1,2-mannosidase family protein	PF02458|Transferase;	NA	NA	NA	GO:0003824|catalytic activity; GO:0016740|transferase activity; GO:0003674|molecular_function; GO:0016747|transferase activity, transferring acyl groups other than amino-acyl groups; GO:0016746|transferase activity, transferring acyl groups;	Decorating;	NA	NA	Ophio5|4080	0.693	741.495	0	0.9286	0.1848	0.403403	0.238688	PF02458.10|Transferase	GO:0016747|transferase activity, transferring acyl groups other than amino-acyl groups	NA	NA	NA	NA	NA	NA	NA	Up	1	No	Up	1	No	Down	1	No
Ophcf2|00022	scaffold_01:67368-69027	Alive	Fungus	OK	7.68266	12.3858	0.689009	1.13974	0.02845	0.0655557	no	alpha-1,2-mannosidase family protein	PF02458|Transferase;	NA	NA	NA	GO:0003824|catalytic activity; GO:0016740|transferase activity; GO:0003674|molecular_function; GO:0016747|transferase activity, transferring acyl groups other than amino-acyl groups; GO:0016746|transferase activity, transferring acyl groups;	Decorating;	NA	NA	Ophio5|4080	0.693	741.495	0	0.9286	0.1848	0.403403	0.238688	PF02458.10|Transferase	GO:0016747|transferase activity, transferring acyl groups other than amino-acyl groups	NA	NA	NA	NA	NA	NA	NA	Up	1	No	Up	1	No	Down	1	No
Ophcf2|00022	scaffold_01:67368-69027	Alive	Dead	OK	7.68266	6.84505	-0.166545	-0.25822	0.56625	0.689223	no	alpha-1,2-mannosidase family protein	PF02458|Transferase;	NA	NA	NA	GO:0003824|catalytic activity; GO:0016740|transferase activity; GO:0003674|molecular_function; GO:0016747|transferase activity, transferring acyl groups other than amino-acyl groups; GO:0016746|transferase activity, transferring acyl groups;	Decorating;	NA	NA	Ophio5|4080	0.693	741.495	0	0.9286	0.1848	0.403403	0.238688	PF02458.10|Transferase	GO:0016747|transferase activity, transferring acyl groups other than amino-acyl groups	NA	NA	NA	NA	NA	NA	NA	Up	1	No	Up	1	No	Down	1	No
Ophcf2|00023	scaffold_01:69090-70159	Dead	Fungus	OK	23.4528	27.359	0.222255	0.40161	0.43525	0.572076	no	Clavaminate synthase-like protein	PF02668|TauD;	NA	NA	NA	GO:0003824|catalytic activity; GO:0055114|oxidation-reduction process; GO:0016491|oxidoreductase activity; GO:0003674|molecular_function; GO:0008150|biological_process; GO:0008152|metabolic process;	;	NA	NA	Ophio5|4081	0.776	511.531	0	0.9657	10.7597	1.77505	2.52625	PF02668.11|TauD	GO:0016491|oxidoreductase activity;GO:0055114|oxidation-reduction process	NA	NA	NA	NA	NA	NA	NA	Down	0.000285532	Yes	Down	0.00143681	Yes	Up	0.501609	No
Ophcf2|00023	scaffold_01:69090-70159	Alive	Dead	OK	35.2115	23.4528	-0.586283	-1.08611	0.0171	0.0426117	yes	Clavaminate synthase-like protein	PF02668|TauD;	NA	NA	NA	GO:0003824|catalytic activity; GO:0055114|oxidation-reduction process; GO:0016491|oxidoreductase activity; GO:0003674|molecular_function; GO:0008150|biological_process; GO:0008152|metabolic process;	;	NA	NA	Ophio5|4081	0.776	511.531	0	0.9657	10.7597	1.77505	2.52625	PF02668.11|TauD	GO:0016491|oxidoreductase activity;GO:0055114|oxidation-reduction process	NA	NA	NA	NA	NA	NA	NA	Down	0.000285532	Yes	Down	0.00143681	Yes	Up	0.501609	No
Ophcf2|00023	scaffold_01:69090-70159	Alive	Fungus	OK	35.2115	27.359	-0.364029	-0.687707	0.1738	0.283726	no	Clavaminate synthase-like protein	PF02668|TauD;	NA	NA	NA	GO:0003824|catalytic activity; GO:0055114|oxidation-reduction process; GO:0016491|oxidoreductase activity; GO:0003674|molecular_function; GO:0008150|biological_process; GO:0008152|metabolic process;	;	NA	NA	Ophio5|4081	0.776	511.531	0	0.9657	10.7597	1.77505	2.52625	PF02668.11|TauD	GO:0016491|oxidoreductase activity;GO:0055114|oxidation-reduction process	NA	NA	NA	NA	NA	NA	NA	Down	0.000285532	Yes	Down	0.00143681	Yes	Up	0.501609	No
Ophcf2|00024	scaffold_01:70477-70771	Dead	Fungus	OK	53.4715	53.1961	-0.0074499	-0.0101642	0.9831	0.990447	no	DUF341 domain-containing protein	PF03959|FSH1;	NA	NA	NA	NA	;	NA	NA	Ophio5|4082	0.806	167.933	7.1e-54	0.949	7.45247	2.54855	1.17488	PF03959.8|FSH1	NA	NA	NA	NA	NA	NA	NA	NA	Down	0.0117917	Yes	Down	0.00164691	Yes	Down	0.141587	No
Ophcf2|00024	scaffold_01:70477-70771	Alive	Fungus	OK	67.27	53.1961	-0.338643	-0.472722	0.35665	0.49358	no	DUF341 domain-containing protein	PF03959|FSH1;	NA	NA	NA	NA	;	NA	NA	Ophio5|4082	0.806	167.933	7.1e-54	0.949	7.45247	2.54855	1.17488	PF03959.8|FSH1	NA	NA	NA	NA	NA	NA	NA	NA	Down	0.0117917	Yes	Down	0.00164691	Yes	Down	0.141587	No
Ophcf2|00024	scaffold_01:70477-70771	Alive	Dead	OK	67.27	53.4715	-0.331193	-0.462307	0.3014	0.4335	no	DUF341 domain-containing protein	PF03959|FSH1;	NA	NA	NA	NA	;	NA	NA	Ophio5|4082	0.806	167.933	7.1e-54	0.949	7.45247	2.54855	1.17488	PF03959.8|FSH1	NA	NA	NA	NA	NA	NA	NA	NA	Down	0.0117917	Yes	Down	0.00164691	Yes	Down	0.141587	No
Ophcf2|00025	scaffold_01:70833-71406	Alive	Fungus	OK	37.8393	32.4717	-0.220704	-0.365197	0.4665	0.600311	no	serine hydrolase FSH	NA	NA	NA	NA	NA	;	NA	NA	Ophio5|4082	0.728	293.123	1.57e-101	0.9948	7.45247	2.54855	1.17488	PF03959.8|FSH1	NA	NA	NA	NA	NA	NA	NA	NA	Down	0.0117917	Yes	Down	0.00164691	Yes	Down	0.141587	No
Ophcf2|00025	scaffold_01:70833-71406	Dead	Fungus	OK	29.9004	32.4717	0.119015	0.191827	0.7049	0.800921	no	serine hydrolase FSH	NA	NA	NA	NA	NA	;	NA	NA	Ophio5|4082	0.728	293.123	1.57e-101	0.9948	7.45247	2.54855	1.17488	PF03959.8|FSH1	NA	NA	NA	NA	NA	NA	NA	NA	Down	0.0117917	Yes	Down	0.00164691	Yes	Down	0.141587	No
Ophcf2|00025	scaffold_01:70833-71406	Alive	Dead	OK	37.8393	29.9004	-0.339719	-0.559625	0.20885	0.327581	no	serine hydrolase FSH	NA	NA	NA	NA	NA	;	NA	NA	Ophio5|4082	0.728	293.123	1.57e-101	0.9948	7.45247	2.54855	1.17488	PF03959.8|FSH1	NA	NA	NA	NA	NA	NA	NA	NA	Down	0.0117917	Yes	Down	0.00164691	Yes	Down	0.141587	No
Ophcf2|00026	scaffold_01:71970-80132	Alive	Fungus	OK	17.2618	21.9235	0.344892	0.769703	0.1273	0.221548	no	polyketide synthase	PF13847|Methyltransf_31; PF13489|Methyltransf_23; PF00698|Acyl_transf_1; PF13649|Methyltransf_25; PF01209|Ubie_methyltran; PF08240|ADH_N; PF00107|ADH_zinc_N; PF00109|ketoacyl-synt; PF00550|PP-binding; PF08241|Methyltransf_11; PF02801|Ketoacyl-synt_C; PF00106|adh_short; PF08242|Methyltransf_12; PF13602|ADH_zinc_N_2; PF16197|KAsynt_C_assoc; PF08659|KR; PF14765|PS-DH;	NA	NA	NA	GO:0003824|catalytic activity; GO:0016741|transferase activity, transferring one-carbon groups; GO:0008168|methyltransferase activity; GO:0055114|oxidation-reduction process; GO:0016740|transferase activity; GO:0003674|molecular_function; GO:0008150|biological_process; GO:0008152|metabolic process;	PKS;	NA	NA	Ophio5|4083	0.807	4275.32	0	0.9969	8.28801	3.0296	3.7871	PF00109.21|ketoacyl-synt;PF08659.5|KR;PF00698.16|Acyl_transf_1;PF00106.20|adh_short;PF14765.1|PS-DH;PF02801.17|Ketoacyl-synt_C;PF00107.21|ADH_zinc_N;PF08242.7|Methyltransf_12;PF13489.1|Methyltransf_23;PF08241.7|Methyltransf_11;PF13847.1|Methyltransf_31;PF13602.1|ADH_zinc_N_2;PF08240.7|ADH_N;PF12847.2|Methyltransf_18;PF01209.13|Ubie_methyltran;PF00550.20|PP-binding	GO:0016491|oxidoreductase activity;GO:0008270|zinc ion binding;GO:0055114|oxidation-reduction process;GO:0008168|methyltransferase activity;GO:0008152|metabolic process	NA	NA	NA	NA	NA	NA	NA	Down	0.000285532	Yes	Down	0.000770107	Yes	Up	0.441277	No
Ophcf2|00026	scaffold_01:71970-80132	Dead	Fungus	OK	17.2279	21.9235	0.347733	0.775898	0.12315	0.21563	no	polyketide synthase	PF13847|Methyltransf_31; PF13489|Methyltransf_23; PF00698|Acyl_transf_1; PF13649|Methyltransf_25; PF01209|Ubie_methyltran; PF08240|ADH_N; PF00107|ADH_zinc_N; PF00109|ketoacyl-synt; PF00550|PP-binding; PF08241|Methyltransf_11; PF02801|Ketoacyl-synt_C; PF00106|adh_short; PF08242|Methyltransf_12; PF13602|ADH_zinc_N_2; PF16197|KAsynt_C_assoc; PF08659|KR; PF14765|PS-DH;	NA	NA	NA	GO:0003824|catalytic activity; GO:0016741|transferase activity, transferring one-carbon groups; GO:0008168|methyltransferase activity; GO:0055114|oxidation-reduction process; GO:0016740|transferase activity; GO:0003674|molecular_function; GO:0008150|biological_process; GO:0008152|metabolic process;	PKS;	NA	NA	Ophio5|4083	0.807	4275.32	0	0.9969	8.28801	3.0296	3.7871	PF00109.21|ketoacyl-synt;PF08659.5|KR;PF00698.16|Acyl_transf_1;PF00106.20|adh_short;PF14765.1|PS-DH;PF02801.17|Ketoacyl-synt_C;PF00107.21|ADH_zinc_N;PF08242.7|Methyltransf_12;PF13489.1|Methyltransf_23;PF08241.7|Methyltransf_11;PF13847.1|Methyltransf_31;PF13602.1|ADH_zinc_N_2;PF08240.7|ADH_N;PF12847.2|Methyltransf_18;PF01209.13|Ubie_methyltran;PF00550.20|PP-binding	GO:0016491|oxidoreductase activity;GO:0008270|zinc ion binding;GO:0055114|oxidation-reduction process;GO:0008168|methyltransferase activity;GO:0008152|metabolic process	NA	NA	NA	NA	NA	NA	NA	Down	0.000285532	Yes	Down	0.000770107	Yes	Up	0.441277	No
Ophcf2|00026	scaffold_01:71970-80132	Alive	Dead	OK	17.2618	17.2279	-0.00284093	-0.00641911	0.98745	0.992473	no	polyketide synthase	PF13847|Methyltransf_31; PF13489|Methyltransf_23; PF00698|Acyl_transf_1; PF13649|Methyltransf_25; PF01209|Ubie_methyltran; PF08240|ADH_N; PF00107|ADH_zinc_N; PF00109|ketoacyl-synt; PF00550|PP-binding; PF08241|Methyltransf_11; PF02801|Ketoacyl-synt_C; PF00106|adh_short; PF08242|Methyltransf_12; PF13602|ADH_zinc_N_2; PF16197|KAsynt_C_assoc; PF08659|KR; PF14765|PS-DH;	NA	NA	NA	GO:0003824|catalytic activity; GO:0016741|transferase activity, transferring one-carbon groups; GO:0008168|methyltransferase activity; GO:0055114|oxidation-reduction process; GO:0016740|transferase activity; GO:0003674|molecular_function; GO:0008150|biological_process; GO:0008152|metabolic process;	PKS;	NA	NA	Ophio5|4083	0.807	4275.32	0	0.9969	8.28801	3.0296	3.7871	PF00109.21|ketoacyl-synt;PF08659.5|KR;PF00698.16|Acyl_transf_1;PF00106.20|adh_short;PF14765.1|PS-DH;PF02801.17|Ketoacyl-synt_C;PF00107.21|ADH_zinc_N;PF08242.7|Methyltransf_12;PF13489.1|Methyltransf_23;PF08241.7|Methyltransf_11;PF13847.1|Methyltransf_31;PF13602.1|ADH_zinc_N_2;PF08240.7|ADH_N;PF12847.2|Methyltransf_18;PF01209.13|Ubie_methyltran;PF00550.20|PP-binding	GO:0016491|oxidoreductase activity;GO:0008270|zinc ion binding;GO:0055114|oxidation-reduction process;GO:0008168|methyltransferase activity;GO:0008152|metabolic process	NA	NA	NA	NA	NA	NA	NA	Down	0.000285532	Yes	Down	0.000770107	Yes	Up	0.441277	No
Ophcf2|00027	scaffold_01:80516-83160	Alive	Dead	OK	7.01064	4.80619	-0.544651	-0.817238	0.06665	0.131207	no	Cytochrome P450 4V2	PF00067|p450;	NA	NA	NA	GO:0003824|catalytic activity; GO:0005506|iron ion binding; GO:0005488|binding; GO:0046906|tetrapyrrole binding; GO:0097159|organic cyclic compound binding; GO:0048037|cofactor binding; GO:0055114|oxidation-reduction process; GO:0046872|metal ion binding; GO:0003674|molecular_function; GO:0016705|oxidoreductase activity, acting on paired donors, with incorporation or reduction of molecular oxygen…	Decorating;	NA	1;	Ophio5|4084	0.685	711.835	0	0.9165	0.831884	0.465707	0.188406	PF00067.17|p450	GO:0005506|iron ion binding;GO:0055114|oxidation-reduction process;GO:0016705|oxidoreductase activity, acting on paired donors, with incorporation or reduction of molecular oxygen;GO:0020037|heme binding	NA	NA	NA	1	NA	NA	NA	Down	1	No	Down	1	No	Down	1	No
Ophcf2|00027	scaffold_01:80516-83160	Alive	Fungus	OK	7.01064	4.50474	-0.638101	-0.951811	0.0657	0.129764	no	Cytochrome P450 4V2	PF00067|p450;	NA	NA	NA	GO:0003824|catalytic activity; GO:0005506|iron ion binding; GO:0005488|binding; GO:0046906|tetrapyrrole binding; GO:0097159|organic cyclic compound binding; GO:0048037|cofactor binding; GO:0055114|oxidation-reduction process; GO:0046872|metal ion binding; GO:0003674|molecular_function; GO:0016705|oxidoreductase activity, acting on paired donors, with incorporation or reduction of molecular oxygen…	Decorating;	NA	1;	Ophio5|4084	0.685	711.835	0	0.9165	0.831884	0.465707	0.188406	PF00067.17|p450	GO:0005506|iron ion binding;GO:0055114|oxidation-reduction process;GO:0016705|oxidoreductase activity, acting on paired donors, with incorporation or reduction of molecular oxygen;GO:0020037|heme binding	NA	NA	NA	1	NA	NA	NA	Down	1	No	Down	1	No	Down	1	No
Ophcf2|00027	scaffold_01:80516-83160	Dead	Fungus	OK	4.80619	4.50474	-0.0934499	-0.135188	0.7929	0.865398	no	Cytochrome P450 4V2	PF00067|p450;	NA	NA	NA	GO:0003824|catalytic activity; GO:0005506|iron ion binding; GO:0005488|binding; GO:0046906|tetrapyrrole binding; GO:0097159|organic cyclic compound binding; GO:0048037|cofactor binding; GO:0055114|oxidation-reduction process; GO:0046872|metal ion binding; GO:0003674|molecular_function; GO:0016705|oxidoreductase activity, acting on paired donors, with incorporation or reduction of molecular oxygen…	Decorating;	NA	1;	Ophio5|4084	0.685	711.835	0	0.9165	0.831884	0.465707	0.188406	PF00067.17|p450	GO:0005506|iron ion binding;GO:0055114|oxidation-reduction process;GO:0016705|oxidoreductase activity, acting on paired donors, with incorporation or reduction of molecular oxygen;GO:0020037|heme binding	NA	NA	NA	1	NA	NA	NA	Down	1	No	Down	1	No	Down	1	No
Ophcf2|00028	scaffold_01:84060-86419	Alive	Fungus	OK	47.5432	47.5077	-0.00107783	-0.00244602	0.9959	0.997519	no	cytochrome b/b6/petB-like protein	NA	Has signal peptide;	NA	NA	NA	NA	NA	5;	Ophio5|4087	0.514	479.174	7.59e-159	0.7884	37.3201	42.3319	30.7804	NA	NA	NA	NA	NA	5	NA	NA	NA	Up	0.627853	No	Down	0.430866	No	Down	0.167733	No
Ophcf2|00028	scaffold_01:84060-86419	Alive	Dead	OK	47.5432	43.3462	-0.133332	-0.302441	0.49335	0.624945	no	cytochrome b/b6/petB-like protein	NA	Has signal peptide;	NA	NA	NA	NA	NA	5;	Ophio5|4087	0.514	479.174	7.59e-159	0.7884	37.3201	42.3319	30.7804	NA	NA	NA	NA	NA	5	NA	NA	NA	Up	0.627853	No	Down	0.430866	No	Down	0.167733	No
Ophcf2|00028	scaffold_01:84060-86419	Dead	Fungus	OK	43.3462	47.5077	0.132254	0.306998	0.5485	0.674086	no	cytochrome b/b6/petB-like protein	NA	Has signal peptide;	NA	NA	NA	NA	NA	5;	Ophio5|4087	0.514	479.174	7.59e-159	0.7884	37.3201	42.3319	30.7804	NA	NA	NA	NA	NA	5	NA	NA	NA	Up	0.627853	No	Down	0.430866	No	Down	0.167733	No
Ophcf2|00029	scaffold_01:86570-88115	Alive	Fungus	OK	0.0143705	13.1595	9.83878	2.04121	0.08525	0.16078	no	endothelin-converting enzyme 1	PF01431|Peptidase_M13; PF05649|Peptidase_M13_N;	NA	NA	NA	GO:0003824|catalytic activity; GO:0140096|catalytic activity, acting on a protein; GO:0043170|macromolecule metabolic process; GO:0016787|hydrolase activity; GO:0004222|metalloendopeptidase activity; GO:0006807|nitrogen compound metabolic process; GO:0003674|molecular_function; GO:0004175|endopeptidase activity; GO:0006508|proteolysis; GO:0019538|protein metabolic process; GO:0008150|biological_p…	NA	MER111368 - endothelin-converting enzyme 2 (Oryzias latipes) [M13.003]#M13#; MER029420 - endothelin-converting enzyme 1 (Xenopus laevis) [M13.002]#M13#; MER001056 - endothelin-converting enzyme 1 (Bos taurus) [M13.002]#M13#; MER001991 - endothelin-converting enzyme 2 (Bos taurus) [M13.003]#M13#; MER178295 - neprilysin-4 {{Drosophila melanogaster}} (Pediculus humanus) [M13.014]#M13#; MER011838 - D…	NA	Ophio5|4088	0.4	319.701	5.74e-102	0.9853	5.59395	2.47233	1.68931	PF01431.16|Peptidase_M13;PF05649.8|Peptidase_M13_N	GO:0006508|proteolysis;GO:0004222|metalloendopeptidase activity	NA	NA	NA	NA	M13	NA	NA	Down	0.0126885	Yes	Down	0.00121735	Yes	Down	0.341894	No
Ophcf2|00029	scaffold_01:86570-88115	Alive	Dead	NOTEST	0.0143705	0.0507558	1.82046	0	1	1	no	endothelin-converting enzyme 1	PF01431|Peptidase_M13; PF05649|Peptidase_M13_N;	NA	NA	NA	GO:0003824|catalytic activity; GO:0140096|catalytic activity, acting on a protein; GO:0043170|macromolecule metabolic process; GO:0016787|hydrolase activity; GO:0004222|metalloendopeptidase activity; GO:0006807|nitrogen compound metabolic process; GO:0003674|molecular_function; GO:0004175|endopeptidase activity; GO:0006508|proteolysis; GO:0019538|protein metabolic process; GO:0008150|biological_p…	NA	MER111368 - endothelin-converting enzyme 2 (Oryzias latipes) [M13.003]#M13#; MER029420 - endothelin-converting enzyme 1 (Xenopus laevis) [M13.002]#M13#; MER001056 - endothelin-converting enzyme 1 (Bos taurus) [M13.002]#M13#; MER001991 - endothelin-converting enzyme 2 (Bos taurus) [M13.003]#M13#; MER178295 - neprilysin-4 {{Drosophila melanogaster}} (Pediculus humanus) [M13.014]#M13#; MER011838 - D…	NA	Ophio5|4088	0.4	319.701	5.74e-102	0.9853	5.59395	2.47233	1.68931	PF01431.16|Peptidase_M13;PF05649.8|Peptidase_M13_N	GO:0006508|proteolysis;GO:0004222|metalloendopeptidase activity	NA	NA	NA	NA	M13	NA	NA	Down	0.0126885	Yes	Down	0.00121735	Yes	Down	0.341894	No
Ophcf2|00029	scaffold_01:86570-88115	Dead	Fungus	OK	0.0507558	13.1595	8.01832	4.0205	0.0641	0.127432	no	endothelin-converting enzyme 1	PF01431|Peptidase_M13; PF05649|Peptidase_M13_N;	NA	NA	NA	GO:0003824|catalytic activity; GO:0140096|catalytic activity, acting on a protein; GO:0043170|macromolecule metabolic process; GO:0016787|hydrolase activity; GO:0004222|metalloendopeptidase activity; GO:0006807|nitrogen compound metabolic process; GO:0003674|molecular_function; GO:0004175|endopeptidase activity; GO:0006508|proteolysis; GO:0019538|protein metabolic process; GO:0008150|biological_p…	NA	MER111368 - endothelin-converting enzyme 2 (Oryzias latipes) [M13.003]#M13#; MER029420 - endothelin-converting enzyme 1 (Xenopus laevis) [M13.002]#M13#; MER001056 - endothelin-converting enzyme 1 (Bos taurus) [M13.002]#M13#; MER001991 - endothelin-converting enzyme 2 (Bos taurus) [M13.003]#M13#; MER178295 - neprilysin-4 {{Drosophila melanogaster}} (Pediculus humanus) [M13.014]#M13#; MER011838 - D…	NA	Ophio5|4088	0.4	319.701	5.74e-102	0.9853	5.59395	2.47233	1.68931	PF01431.16|Peptidase_M13;PF05649.8|Peptidase_M13_N	GO:0006508|proteolysis;GO:0004222|metalloendopeptidase activity	NA	NA	NA	NA	M13	NA	NA	Down	0.0126885	Yes	Down	0.00121735	Yes	Down	0.341894	No
Ophcf2|00030	scaffold_01:88618-89594	Alive	Fungus	OK	4.07509	9.24698	1.18215	1.54096	0.00315	0.00985431	yes	hypothetical protein CDD80_2632	NA	Has signal peptide;	Small secreted protein;	NA	NA	NA	NA	NA	Ophio5|2573	0.49	103.99	1.58e-26	0.5356	0.501318	0.592387	0.314881	NA	NA	NA	SignalP: has predicted secretion signal	NA	NA	NA	NA	NA	Up	1	No	Down	1	No	Down	1	No
Ophcf2|00030	scaffold_01:88618-89594	Dead	Fungus	OK	3.83398	9.24698	1.27014	1.584	0.0044	0.0132258	yes	hypothetical protein CDD80_2632	NA	Has signal peptide;	Small secreted protein;	NA	NA	NA	NA	NA	Ophio5|2573	0.49	103.99	1.58e-26	0.5356	0.501318	0.592387	0.314881	NA	NA	NA	SignalP: has predicted secretion signal	NA	NA	NA	NA	NA	Up	1	No	Down	1	No	Down	1	No
Ophcf2|00030	scaffold_01:88618-89594	Alive	Dead	OK	4.07509	3.83398	-0.087989	-0.102758	0.8141	0.880281	no	hypothetical protein CDD80_2632	NA	Has signal peptide;	Small secreted protein;	NA	NA	NA	NA	NA	Ophio5|2573	0.49	103.99	1.58e-26	0.5356	0.501318	0.592387	0.314881	NA	NA	NA	SignalP: has predicted secretion signal	NA	NA	NA	NA	NA	Up	1	No	Down	1	No	Down	1	No
Ophcf2|00031	scaffold_01:90568-91849	Alive	Dead	OK	13.5062	13.0024	-0.054837	-0.0925323	0.8327	0.89311	no	hypothetical protein CDD80_2634	NA	NA	NA	NA	NA	NA	NA	1;	Ophio5|2572	0.498	355.14	2.05e-119	0.8735	13.9736	16.3795	13.4067	NA	NA	NA	NA	NA	1	NA	NA	NA	Up	0.636577	No	Down	0.911765	No	Down	0.551464	No
Ophcf2|00031	scaffold_01:90568-91849	Dead	Fungus	OK	13.0024	42.7218	1.71619	3.24646	5e-05	0.000237974	yes	hypothetical protein CDD80_2634	NA	NA	NA	NA	NA	NA	NA	1;	Ophio5|2572	0.498	355.14	2.05e-119	0.8735	13.9736	16.3795	13.4067	NA	NA	NA	NA	NA	1	NA	NA	NA	Up	0.636577	No	Down	0.911765	No	Down	0.551464	No
Ophcf2|00031	scaffold_01:90568-91849	Alive	Fungus	OK	13.5062	42.7218	1.66136	3.11622	5e-05	0.000237974	yes	hypothetical protein CDD80_2634	NA	NA	NA	NA	NA	NA	NA	1;	Ophio5|2572	0.498	355.14	2.05e-119	0.8735	13.9736	16.3795	13.4067	NA	NA	NA	NA	NA	1	NA	NA	NA	Up	0.636577	No	Down	0.911765	No	Down	0.551464	No
Ophcf2|00032	scaffold_01:92537-94237	Alive	Dead	OK	156.727	138.665	-0.176651	-0.371444	0.39135	0.528679	no	Phosphatidylinositol-glycan biosynthesis class S protein	PF10510|PIG-S;	NA	NA	NA	GO:0005575|cellular_component; GO:0006464|cellular protein modification process; GO:0044425|membrane part; GO:0042765|GPI-anchor transamidase complex; GO:0071704|organic substance metabolic process; GO:0009987|cellular process; GO:0044424|intracellular part; GO:0043412|macromolecule modification; GO:0032991|protein-containing complex; GO:0044267|cellular protein metabolic process; GO:0043170|macr…	NA	NA	2;	Ophio5|2571	0.904	867.455	0	0.8901	86.0979	136.53	110.195	PF10510.4|PIG-S	GO:0042765|GPI-anchor transamidase complex;GO:0016255|attachment of GPI anchor to protein	NA	NA	NA	2	NA	NA	NA	Up	0.0455321	No	Up	0.307222	No	Down	0.400631	No
Ophcf2|00032	scaffold_01:92537-94237	Dead	Fungus	OK	138.665	129.85	-0.09476	-0.204	0.68415	0.785622	no	Phosphatidylinositol-glycan biosynthesis class S protein	PF10510|PIG-S;	NA	NA	NA	GO:0005575|cellular_component; GO:0006464|cellular protein modification process; GO:0044425|membrane part; GO:0042765|GPI-anchor transamidase complex; GO:0071704|organic substance metabolic process; GO:0009987|cellular process; GO:0044424|intracellular part; GO:0043412|macromolecule modification; GO:0032991|protein-containing complex; GO:0044267|cellular protein metabolic process; GO:0043170|macr…	NA	NA	2;	Ophio5|2571	0.904	867.455	0	0.8901	86.0979	136.53	110.195	PF10510.4|PIG-S	GO:0042765|GPI-anchor transamidase complex;GO:0016255|attachment of GPI anchor to protein	NA	NA	NA	2	NA	NA	NA	Up	0.0455321	No	Up	0.307222	No	Down	0.400631	No
Ophcf2|00032	scaffold_01:92537-94237	Alive	Fungus	OK	156.727	129.85	-0.271411	-0.57376	0.2631	0.390818	no	Phosphatidylinositol-glycan biosynthesis class S protein	PF10510|PIG-S;	NA	NA	NA	GO:0005575|cellular_component; GO:0006464|cellular protein modification process; GO:0044425|membrane part; GO:0042765|GPI-anchor transamidase complex; GO:0071704|organic substance metabolic process; GO:0009987|cellular process; GO:0044424|intracellular part; GO:0043412|macromolecule modification; GO:0032991|protein-containing complex; GO:0044267|cellular protein metabolic process; GO:0043170|macr…	NA	NA	2;	Ophio5|2571	0.904	867.455	0	0.8901	86.0979	136.53	110.195	PF10510.4|PIG-S	GO:0042765|GPI-anchor transamidase complex;GO:0016255|attachment of GPI anchor to protein	NA	NA	NA	2	NA	NA	NA	Up	0.0455321	No	Up	0.307222	No	Down	0.400631	No
Ophcf2|00033	scaffold_01:95066-95609	Alive	Dead	OK	47.7703	23.0484	-1.05145	-1.57144	0.0002	0.000851223	yes	hypothetical protein CDD80_2636	NA	Has signal peptide;	Small secreted protein;	NA	NA	NA	NA	NA	Ophio5|2570	0.474	58.151	1.3e-11	0.4144	0	0	0	NA	NA	NA	SignalP: has predicted secretion signal; SSP: small secreted protein	NA	NA	NA	NA	NA	=	1	No	=	1	No	=	1	No
Ophcf2|00033	scaffold_01:95066-95609	Alive	Fungus	OK	47.7703	10.4781	-2.18873	-3.02133	5e-05	0.000237974	yes	hypothetical protein CDD80_2636	NA	Has signal peptide;	Small secreted protein;	NA	NA	NA	NA	NA	Ophio5|2570	0.474	58.151	1.3e-11	0.4144	0	0	0	NA	NA	NA	SignalP: has predicted secretion signal; SSP: small secreted protein	NA	NA	NA	NA	NA	=	1	No	=	1	No	=	1	No
Ophcf2|00033	scaffold_01:95066-95609	Dead	Fungus	OK	23.0484	10.4781	-1.13728	-1.53137	0.00435	0.0130919	yes	hypothetical protein CDD80_2636	NA	Has signal peptide;	Small secreted protein;	NA	NA	NA	NA	NA	Ophio5|2570	0.474	58.151	1.3e-11	0.4144	0	0	0	NA	NA	NA	SignalP: has predicted secretion signal; SSP: small secreted protein	NA	NA	NA	NA	NA	=	1	No	=	1	No	=	1	No
Ophcf2|00034	scaffold_01:96422-97593	Alive	Dead	OK	32.1175	24.7311	-0.377036	-0.719716	0.10855	0.195314	no	GPI transamidase component PIG-S	NA	NA	NA	NA	NA	NA	MER045469 - At5g19630 {{Arabidopsis thaliana}} (Arabidopsis thaliana) [S09.A16]#S09X#;	NA	Ophio5|2566	0.681	419.853	4.15e-147	0.938	96.5295	67.218	73.6027	PF12697.2|Abhydrolase_6;PF12695.2|Abhydrolase_5	NA	NA	NA	NA	NA	S09X	NA	NA	Down	0.120289	No	Down	0.243471	No	Up	0.734543	No
Ophcf2|00034	scaffold_01:96422-97593	Alive	Fungus	OK	32.1175	28.8425	-0.155167	-0.302626	0.55535	0.67977	no	GPI transamidase component PIG-S	NA	NA	NA	NA	NA	NA	MER045469 - At5g19630 {{Arabidopsis thaliana}} (Arabidopsis thaliana) [S09.A16]#S09X#;	NA	Ophio5|2566	0.681	419.853	4.15e-147	0.938	96.5295	67.218	73.6027	PF12697.2|Abhydrolase_6;PF12695.2|Abhydrolase_5	NA	NA	NA	NA	NA	S09X	NA	NA	Down	0.120289	No	Down	0.243471	No	Up	0.734543	No
Ophcf2|00034	scaffold_01:96422-97593	Dead	Fungus	OK	24.7311	28.8425	0.221869	0.421163	0.41655	0.554389	no	GPI transamidase component PIG-S	NA	NA	NA	NA	NA	NA	MER045469 - At5g19630 {{Arabidopsis thaliana}} (Arabidopsis thaliana) [S09.A16]#S09X#;	NA	Ophio5|2566	0.681	419.853	4.15e-147	0.938	96.5295	67.218	73.6027	PF12697.2|Abhydrolase_6;PF12695.2|Abhydrolase_5	NA	NA	NA	NA	NA	S09X	NA	NA	Down	0.120289	No	Down	0.243471	No	Up	0.734543	No
Ophcf2|00035	scaffold_01:98344-99853	Dead	Fungus	OK	72.3104	49.4541	-0.548112	-1.23518	0.01505	0.0382681	yes	retinal dehydrogenase 2	PF00171|Aldedh;	NA	NA	NA	GO:0003824|catalytic activity; GO:0055114|oxidation-reduction process; GO:0016491|oxidoreductase activity; GO:0003674|molecular_function; GO:0008150|biological_process; GO:0008152|metabolic process;	NA	NA	NA	Ophio5|2565	0.835	788.875	0	0.9046	54.2013	105.48	53.8386	PF00171.17|Aldedh	GO:0016491|oxidoreductase activity;GO:0055114|oxidation-reduction process;GO:0008152|metabolic process	NA	NA	NA	NA	NA	NA	NA	Up	0.00411343	No	Down	0.981386	No	Down	0.00243641	No
Ophcf2|00035	scaffold_01:98344-99853	Alive	Fungus	OK	114.942	49.4541	-1.21674	-2.6876	5e-05	0.000237974	yes	retinal dehydrogenase 2	PF00171|Aldedh;	NA	NA	NA	GO:0003824|catalytic activity; GO:0055114|oxidation-reduction process; GO:0016491|oxidoreductase activity; GO:0003674|molecular_function; GO:0008150|biological_process; GO:0008152|metabolic process;	NA	NA	NA	Ophio5|2565	0.835	788.875	0	0.9046	54.2013	105.48	53.8386	PF00171.17|Aldedh	GO:0016491|oxidoreductase activity;GO:0055114|oxidation-reduction process;GO:0008152|metabolic process	NA	NA	NA	NA	NA	NA	NA	Up	0.00411343	No	Down	0.981386	No	Down	0.00243641	No
Ophcf2|00035	scaffold_01:98344-99853	Alive	Dead	OK	114.942	72.3104	-0.668629	-1.47845	0.00055	0.00211659	yes	retinal dehydrogenase 2	PF00171|Aldedh;	NA	NA	NA	GO:0003824|catalytic activity; GO:0055114|oxidation-reduction process; GO:0016491|oxidoreductase activity; GO:0003674|molecular_function; GO:0008150|biological_process; GO:0008152|metabolic process;	NA	NA	NA	Ophio5|2565	0.835	788.875	0	0.9046	54.2013	105.48	53.8386	PF00171.17|Aldedh	GO:0016491|oxidoreductase activity;GO:0055114|oxidation-reduction process;GO:0008152|metabolic process	NA	NA	NA	NA	NA	NA	NA	Up	0.00411343	No	Down	0.981386	No	Down	0.00243641	No
Ophcf2|00036	scaffold_01:100045-101776	Dead	Fungus	OK	52.6182	3.61448	-3.8637	-6.36379	5e-05	0.000237974	yes	amino acid permease family protein	PF13520|AA_permease_2; PF00324|AA_permease;	NA	NA	NA	GO:0022857|transmembrane transporter activity; GO:0051234|establishment of localization; GO:0005575|cellular_component; GO:0003674|molecular_function; GO:0006810|transport; GO:0008150|biological_process; GO:0016020|membrane; GO:0051179|localization; GO:0005215|transporter activity; GO:0055085|transmembrane transport;	NA	NA	11;	Ophio5|2564	0.778	818.15	0	0.9411	19.1972	170.341	19.3562	PF13520.1|AA_permease_2;PF00324.16|AA_permease	GO:0003333|amino acid transmembrane transport;GO:0006810|transport;GO:0055085|transmembrane transport;GO:0016020|membrane;GO:0015171|amino acid transmembrane transporter activity	NA	NA	NA	12	NA	NA	NA	Up	0.000285532	Yes	Up	0.981386	No	Down	0.000285532	Yes
Ophcf2|00036	scaffold_01:100045-101776	Alive	Dead	OK	187.01	52.6182	-1.82948	-3.50935	5e-05	0.000237974	yes	amino acid permease family protein	PF13520|AA_permease_2; PF00324|AA_permease;	NA	NA	NA	GO:0022857|transmembrane transporter activity; GO:0051234|establishment of localization; GO:0005575|cellular_component; GO:0003674|molecular_function; GO:0006810|transport; GO:0008150|biological_process; GO:0016020|membrane; GO:0051179|localization; GO:0005215|transporter activity; GO:0055085|transmembrane transport;	NA	NA	11;	Ophio5|2564	0.778	818.15	0	0.9411	19.1972	170.341	19.3562	PF13520.1|AA_permease_2;PF00324.16|AA_permease	GO:0003333|amino acid transmembrane transport;GO:0006810|transport;GO:0055085|transmembrane transport;GO:0016020|membrane;GO:0015171|amino acid transmembrane transporter activity	NA	NA	NA	12	NA	NA	NA	Up	0.000285532	Yes	Up	0.981386	No	Down	0.000285532	Yes
Ophcf2|00036	scaffold_01:100045-101776	Alive	Fungus	OK	187.01	3.61448	-5.69318	-8.64472	5e-05	0.000237974	yes	amino acid permease family protein	PF13520|AA_permease_2; PF00324|AA_permease;	NA	NA	NA	GO:0022857|transmembrane transporter activity; GO:0051234|establishment of localization; GO:0005575|cellular_component; GO:0003674|molecular_function; GO:0006810|transport; GO:0008150|biological_process; GO:0016020|membrane; GO:0051179|localization; GO:0005215|transporter activity; GO:0055085|transmembrane transport;	NA	NA	11;	Ophio5|2564	0.778	818.15	0	0.9411	19.1972	170.341	19.3562	PF13520.1|AA_permease_2;PF00324.16|AA_permease	GO:0003333|amino acid transmembrane transport;GO:0006810|transport;GO:0055085|transmembrane transport;GO:0016020|membrane;GO:0015171|amino acid transmembrane transporter activity	NA	NA	NA	12	NA	NA	NA	Up	0.000285532	Yes	Up	0.981386	No	Down	0.000285532	Yes
Ophcf2|00037	scaffold_01:104149-104995	Alive	Fungus	OK	261.726	0.973341	-8.07089	-8.67455	5e-05	0.000237974	yes	myb family transcription factor	NA	NA	NA	NA	NA	NA	NA	NA	Ophio5|2563	0.419	129.413	6.2e-36	0.9961	6.13701	188.301	65.5602	NA	NA	NA	NA	NA	NA	NA	NA	NA	Up	0.000285532	Yes	Up	0.000285532	Yes	Down	0.000285532	Yes
Ophcf2|00037	scaffold_01:104149-104995	Alive	Dead	OK	261.726	47.871	-2.45083	-4.6523	5e-05	0.000237974	yes	myb family transcription factor	NA	NA	NA	NA	NA	NA	NA	NA	Ophio5|2563	0.419	129.413	6.2e-36	0.9961	6.13701	188.301	65.5602	NA	NA	NA	NA	NA	NA	NA	NA	NA	Up	0.000285532	Yes	Up	0.000285532	Yes	Down	0.000285532	Yes
Ophcf2|00037	scaffold_01:104149-104995	Dead	Fungus	OK	47.871	0.973341	-5.62006	-6.04402	5e-05	0.000237974	yes	myb family transcription factor	NA	NA	NA	NA	NA	NA	NA	NA	Ophio5|2563	0.419	129.413	6.2e-36	0.9961	6.13701	188.301	65.5602	NA	NA	NA	NA	NA	NA	NA	NA	NA	Up	0.000285532	Yes	Up	0.000285532	Yes	Down	0.000285532	Yes
Ophcf2|00038	scaffold_01:105258-106245	Alive	Dead	OK	45.7124	46.9757	0.0393288	0.0804324	0.8567	0.907703	no	protoheme IX farnesyltransferase, mitochondrial	PF01040|UbiA;	NA	NA	NA	GO:0003824|catalytic activity; GO:0005575|cellular_component; GO:0044425|membrane part; GO:0016740|transferase activity; GO:0003674|molecular_function; GO:0031224|intrinsic component of membrane; GO:0016021|integral component of membrane; GO:0016765|transferase activity, transferring alkyl or aryl (other than methyl) groups;	NA	NA	5;	Ophio5|2562	0.899	501.901	4.75e-179	0.9331	43.4769	24.7397	54.8383	PF01040.13|UbiA	GO:0004659|prenyltransferase activity;GO:0016021|integral component of membrane	NA	NA	NA	8	NA	NA	NA	Down	0.0209229	No	Up	0.335599	No	Up	0.000535012	Yes
Ophcf2|00038	scaffold_01:105258-106245	Alive	Fungus	OK	45.7124	65.4628	0.51809	1.09171	0.0345	0.0767655	no	protoheme IX farnesyltransferase, mitochondrial	PF01040|UbiA;	NA	NA	NA	GO:0003824|catalytic activity; GO:0005575|cellular_component; GO:0044425|membrane part; GO:0016740|transferase activity; GO:0003674|molecular_function; GO:0031224|intrinsic component of membrane; GO:0016021|integral component of membrane; GO:0016765|transferase activity, transferring alkyl or aryl (other than methyl) groups;	NA	NA	5;	Ophio5|2562	0.899	501.901	4.75e-179	0.9331	43.4769	24.7397	54.8383	PF01040.13|UbiA	GO:0004659|prenyltransferase activity;GO:0016021|integral component of membrane	NA	NA	NA	8	NA	NA	NA	Down	0.0209229	No	Up	0.335599	No	Up	0.000535012	Yes
Ophcf2|00038	scaffold_01:105258-106245	Dead	Fungus	OK	46.9757	65.4628	0.478761	1.02196	0.0458	0.0970057	no	protoheme IX farnesyltransferase, mitochondrial	PF01040|UbiA;	NA	NA	NA	GO:0003824|catalytic activity; GO:0005575|cellular_component; GO:0044425|membrane part; GO:0016740|transferase activity; GO:0003674|molecular_function; GO:0031224|intrinsic component of membrane; GO:0016021|integral component of membrane; GO:0016765|transferase activity, transferring alkyl or aryl (other than methyl) groups;	NA	NA	5;	Ophio5|2562	0.899	501.901	4.75e-179	0.9331	43.4769	24.7397	54.8383	PF01040.13|UbiA	GO:0004659|prenyltransferase activity;GO:0016021|integral component of membrane	NA	NA	NA	8	NA	NA	NA	Down	0.0209229	No	Up	0.335599	No	Up	0.000535012	Yes
Ophcf2|00039	scaffold_01:106964-107431	Alive	Fungus	OK	19.7666	32.078	0.69852	0.849127	0.099	0.181553	no	---NA---	NA	NA	NA	NA	NA	NA	NA	NA	NA	NA	NA	NA	NA	NA	NA	NA	NA	NA	NA	NA	NA	NA	NA	NA	NA	NA	NA	NA	NA	NA	NA	NA	NA	NA
Ophcf2|00039	scaffold_01:106964-107431	Alive	Dead	OK	19.7666	19.5191	-0.0181767	-0.0212372	0.9602	0.975945	no	---NA---	NA	NA	NA	NA	NA	NA	NA	NA	NA	NA	NA	NA	NA	NA	NA	NA	NA	NA	NA	NA	NA	NA	NA	NA	NA	NA	NA	NA	NA	NA	NA	NA	NA	NA
Ophcf2|00039	scaffold_01:106964-107431	Dead	Fungus	OK	19.5191	32.078	0.716697	0.900438	0.06985	0.136362	no	---NA---	NA	NA	NA	NA	NA	NA	NA	NA	NA	NA	NA	NA	NA	NA	NA	NA	NA	NA	NA	NA	NA	NA	NA	NA	NA	NA	NA	NA	NA	NA	NA	NA	NA	NA
Ophcf2|00040	scaffold_01:107994-109365	Alive	Dead	OK	22.8476	22.9531	0.0066474	0.0123922	0.97655	0.986382	no	protein related to integral membrane protein PTH11	NA	NA	NA	NA	NA	NA	NA	7;	Ophio5|2561	0.749	476.478	7.18e-170	0.7683	11.675	5.33127	6.84645	NA	NA	NA	NA	NA	6	NA	NA	NA	Down	0.0665364	No	Down	0.127842	No	Up	0.58815	No
Ophcf2|00040	scaffold_01:107994-109365	Dead	Fungus	OK	22.9531	22.985	0.00200284	0.00374218	0.9945	0.99644	no	protein related to integral membrane protein PTH11	NA	NA	NA	NA	NA	NA	NA	7;	Ophio5|2561	0.749	476.478	7.18e-170	0.7683	11.675	5.33127	6.84645	NA	NA	NA	NA	NA	6	NA	NA	NA	Down	0.0665364	No	Down	0.127842	No	Up	0.58815	No
Ophcf2|00040	scaffold_01:107994-109365	Alive	Fungus	OK	22.8476	22.985	0.00865025	0.0161122	0.97395	0.98477	no	protein related to integral membrane protein PTH11	NA	NA	NA	NA	NA	NA	NA	7;	Ophio5|2561	0.749	476.478	7.18e-170	0.7683	11.675	5.33127	6.84645	NA	NA	NA	NA	NA	6	NA	NA	NA	Down	0.0665364	No	Down	0.127842	No	Up	0.58815	No
Ophcf2|00041	scaffold_01:109549-111126	Alive	Dead	OK	21.2125	19.584	-0.115238	-0.21119	0.63265	0.743503	no	short chain dehydrogenase	PF00106|adh_short; PF13561|adh_short_C2;	NA	NA	NA	NA	NA	NA	1;	Ophio5|2560	0.551	313.538	1.46e-104	0.6143	1.07856	1.83775	0.347563	PF00106.20|adh_short;PF08659.5|KR	GO:0016491|oxidoreductase activity;GO:0008152|metabolic process	NA	SignalP: has predicted secretion signal	NA	2	NA	NA	NA	Up	0.367037	No	Down	1	No	Down	0.0551812	No
Ophcf2|00041	scaffold_01:109549-111126	Dead	Fungus	OK	19.584	18.341	-0.0946048	-0.17377	0.7362	0.824212	no	short chain dehydrogenase	PF00106|adh_short; PF13561|adh_short_C2;	NA	NA	NA	NA	NA	NA	1;	Ophio5|2560	0.551	313.538	1.46e-104	0.6143	1.07856	1.83775	0.347563	PF00106.20|adh_short;PF08659.5|KR	GO:0016491|oxidoreductase activity;GO:0008152|metabolic process	NA	SignalP: has predicted secretion signal	NA	2	NA	NA	NA	Up	0.367037	No	Down	1	No	Down	0.0551812	No
Ophcf2|00041	scaffold_01:109549-111126	Alive	Fungus	OK	21.2125	18.341	-0.209843	-0.382423	0.4497	0.585609	no	short chain dehydrogenase	PF00106|adh_short; PF13561|adh_short_C2;	NA	NA	NA	NA	NA	NA	1;	Ophio5|2560	0.551	313.538	1.46e-104	0.6143	1.07856	1.83775	0.347563	PF00106.20|adh_short;PF08659.5|KR	GO:0016491|oxidoreductase activity;GO:0008152|metabolic process	NA	SignalP: has predicted secretion signal	NA	2	NA	NA	NA	Up	0.367037	No	Down	1	No	Down	0.0551812	No
Ophcf2|00042	scaffold_01:111922-113282	Alive	Fungus	OK	35.9708	44.123	0.294705	0.61355	0.2406	0.365269	no	retinol dehydrogenase protein	NA	NA	NA	NA	NA	NA	NA	8;	Ophio5|2559	0.671	524.628	0	0.9906	50.9901	33.8169	7.22048	NA	NA	NA	NA	NA	10	NA	NA	NA	Down	0.140522	No	Down	0.000285532	Yes	Down	0.000285532	Yes
Ophcf2|00042	scaffold_01:111922-113282	Dead	Fungus	OK	40.2316	44.123	0.133201	0.283877	0.5747	0.696733	no	retinol dehydrogenase protein	NA	NA	NA	NA	NA	NA	NA	8;	Ophio5|2559	0.671	524.628	0	0.9906	50.9901	33.8169	7.22048	NA	NA	NA	NA	NA	10	NA	NA	NA	Down	0.140522	No	Down	0.000285532	Yes	Down	0.000285532	Yes
Ophcf2|00042	scaffold_01:111922-113282	Alive	Dead	OK	35.9708	40.2316	0.161504	0.333922	0.45015	0.585947	no	retinol dehydrogenase protein	NA	NA	NA	NA	NA	NA	NA	8;	Ophio5|2559	0.671	524.628	0	0.9906	50.9901	33.8169	7.22048	NA	NA	NA	NA	NA	10	NA	NA	NA	Down	0.140522	No	Down	0.000285532	Yes	Down	0.000285532	Yes
Ophcf2|00043	scaffold_01:113943-115483	Alive	Fungus	OK	53.0374	31.0911	-0.77051	-1.65925	0.00125	0.00437632	yes	phosphatidylserine decarboxylase	PF02666|PS_Dcarbxylase; PF12588|PSDC;	Has signal peptide;	NA	NA	GO:0003674|molecular_function; GO:0008654|phospholipid biosynthetic process; GO:0044255|cellular lipid metabolic process; GO:0006644|phospholipid metabolic process; GO:0071704|organic substance metabolic process; GO:0009987|cellular process; GO:0006629|lipid metabolic process; GO:0016829|lyase activity; GO:0044237|cellular metabolic process; GO:0003824|catalytic activity; GO:0008610|lipid biosynt…	NA	NA	NA	Ophio5|2558	0.779	743.806	0	0.9643	60.853	438.284	227.143	PF12588.3|PSDC;PF02666.10|PS_Dcarbxylase	GO:0004609|phosphatidylserine decarboxylase activity;GO:0008654|phospholipid biosynthetic process	NA	SignalP: has predicted secretion signal	NA	NA	NA	NA	NA	Up	0.000285532	Yes	Up	0.000285532	Yes	Down	0.118989	No
Ophcf2|00043	scaffold_01:113943-115483	Alive	Dead	OK	53.0374	104.488	0.978263	2.10136	5e-05	0.000237974	yes	phosphatidylserine decarboxylase	PF02666|PS_Dcarbxylase; PF12588|PSDC;	Has signal peptide;	NA	NA	GO:0003674|molecular_function; GO:0008654|phospholipid biosynthetic process; GO:0044255|cellular lipid metabolic process; GO:0006644|phospholipid metabolic process; GO:0071704|organic substance metabolic process; GO:0009987|cellular process; GO:0006629|lipid metabolic process; GO:0016829|lyase activity; GO:0044237|cellular metabolic process; GO:0003824|catalytic activity; GO:0008610|lipid biosynt…	NA	NA	NA	Ophio5|2558	0.779	743.806	0	0.9643	60.853	438.284	227.143	PF12588.3|PSDC;PF02666.10|PS_Dcarbxylase	GO:0004609|phosphatidylserine decarboxylase activity;GO:0008654|phospholipid biosynthetic process	NA	SignalP: has predicted secretion signal	NA	NA	NA	NA	NA	Up	0.000285532	Yes	Up	0.000285532	Yes	Down	0.118989	No
Ophcf2|00043	scaffold_01:113943-115483	Dead	Fungus	OK	104.488	31.0911	-1.74877	-3.64705	5e-05	0.000237974	yes	phosphatidylserine decarboxylase	PF02666|PS_Dcarbxylase; PF12588|PSDC;	Has signal peptide;	NA	NA	GO:0003674|molecular_function; GO:0008654|phospholipid biosynthetic process; GO:0044255|cellular lipid metabolic process; GO:0006644|phospholipid metabolic process; GO:0071704|organic substance metabolic process; GO:0009987|cellular process; GO:0006629|lipid metabolic process; GO:0016829|lyase activity; GO:0044237|cellular metabolic process; GO:0003824|catalytic activity; GO:0008610|lipid biosynt…	NA	NA	NA	Ophio5|2558	0.779	743.806	0	0.9643	60.853	438.284	227.143	PF12588.3|PSDC;PF02666.10|PS_Dcarbxylase	GO:0004609|phosphatidylserine decarboxylase activity;GO:0008654|phospholipid biosynthetic process	NA	SignalP: has predicted secretion signal	NA	NA	NA	NA	NA	Up	0.000285532	Yes	Up	0.000285532	Yes	Down	0.118989	No
Ophcf2|00044	scaffold_01:115998-119769	Dead	Fungus	OK	39.2961	21.0805	-0.898477	-1.8931	0.0001	0.000453723	yes	DNA mismatch repair protein msh6	PF05188|MutS_II; PF05192|MutS_III; PF05190|MutS_IV; PF00488|MutS_V; PF01624|MutS_I;	NA	NA	NA	GO:0006950|response to stress; GO:0035639|purine ribonucleoside triphosphate binding; GO:0097159|organic cyclic compound binding; GO:0003674|molecular_function; GO:0032553|ribonucleotide binding; GO:0071704|organic substance metabolic process; GO:0009987|cellular process; GO:0008144|drug binding; GO:0005488|binding; GO:0003690|double-stranded DNA binding; GO:0043170|macromolecule metabolic proces…	NA	NA	NA	Ophio5|2556	0.849	2036.54	0	0.9983	16.7512	72.8915	34.3706	PF00488.16|MutS_V;PF05192.13|MutS_III;PF01624.15|MutS_I;PF05188.12|MutS_II;PF05190.13|MutS_IV	GO:0006298|mismatch repair;GO:0005524|ATP binding;GO:0030983|mismatched DNA binding	NA	NA	NA	NA	NA	NA	NA	Up	0.000285532	Yes	Up	0.00121735	Yes	Down	0.00682395	Yes
Ophcf2|00044	scaffold_01:115998-119769	Alive	Dead	OK	91.276	39.2961	-1.21585	-2.26595	5e-05	0.000237974	yes	DNA mismatch repair protein msh6	PF05188|MutS_II; PF05192|MutS_III; PF05190|MutS_IV; PF00488|MutS_V; PF01624|MutS_I;	NA	NA	NA	GO:0006950|response to stress; GO:0035639|purine ribonucleoside triphosphate binding; GO:0097159|organic cyclic compound binding; GO:0003674|molecular_function; GO:0032553|ribonucleotide binding; GO:0071704|organic substance metabolic process; GO:0009987|cellular process; GO:0008144|drug binding; GO:0005488|binding; GO:0003690|double-stranded DNA binding; GO:0043170|macromolecule metabolic proces…	NA	NA	NA	Ophio5|2556	0.849	2036.54	0	0.9983	16.7512	72.8915	34.3706	PF00488.16|MutS_V;PF05192.13|MutS_III;PF01624.15|MutS_I;PF05188.12|MutS_II;PF05190.13|MutS_IV	GO:0006298|mismatch repair;GO:0005524|ATP binding;GO:0030983|mismatched DNA binding	NA	NA	NA	NA	NA	NA	NA	Up	0.000285532	Yes	Up	0.00121735	Yes	Down	0.00682395	Yes
Ophcf2|00044	scaffold_01:115998-119769	Alive	Fungus	OK	91.276	21.0805	-2.11433	-4.18112	5e-05	0.000237974	yes	DNA mismatch repair protein msh6	PF05188|MutS_II; PF05192|MutS_III; PF05190|MutS_IV; PF00488|MutS_V; PF01624|MutS_I;	NA	NA	NA	GO:0006950|response to stress; GO:0035639|purine ribonucleoside triphosphate binding; GO:0097159|organic cyclic compound binding; GO:0003674|molecular_function; GO:0032553|ribonucleotide binding; GO:0071704|organic substance metabolic process; GO:0009987|cellular process; GO:0008144|drug binding; GO:0005488|binding; GO:0003690|double-stranded DNA binding; GO:0043170|macromolecule metabolic proces…	NA	NA	NA	Ophio5|2556	0.849	2036.54	0	0.9983	16.7512	72.8915	34.3706	PF00488.16|MutS_V;PF05192.13|MutS_III;PF01624.15|MutS_I;PF05188.12|MutS_II;PF05190.13|MutS_IV	GO:0006298|mismatch repair;GO:0005524|ATP binding;GO:0030983|mismatched DNA binding	NA	NA	NA	NA	NA	NA	NA	Up	0.000285532	Yes	Up	0.00121735	Yes	Down	0.00682395	Yes
Ophcf2|00045	scaffold_01:120570-122258	Alive	Fungus	OK	56.7337	41.3583	-0.456027	-1.02247	0.04585	0.0970925	no	related to diphthamide synthesis protein DPH2	PF01866|Diphthamide_syn;	NA	NA	NA	NA	NA	NA	NA	Ophio5|2555	0.716	694.886	0	0.9942	72.5231	41.8241	50.3438	PF01866.12|Diphthamide_syn	GO:0005737|cytoplasm;GO:0017183|peptidyl-diphthamide biosynthetic process from peptidyl-histidine	NA	NA	NA	NA	NA	NA	NA	Down	0.0117917	No	Down	0.111715	No	Up	0.452575	No
Ophcf2|00045	scaffold_01:120570-122258	Alive	Dead	OK	56.7337	52.4072	-0.11444	-0.258964	0.55985	0.683532	no	related to diphthamide synthesis protein DPH2	PF01866|Diphthamide_syn;	NA	NA	NA	NA	NA	NA	NA	Ophio5|2555	0.716	694.886	0	0.9942	72.5231	41.8241	50.3438	PF01866.12|Diphthamide_syn	GO:0005737|cytoplasm;GO:0017183|peptidyl-diphthamide biosynthetic process from peptidyl-histidine	NA	NA	NA	NA	NA	NA	NA	Down	0.0117917	No	Down	0.111715	No	Up	0.452575	No
Ophcf2|00045	scaffold_01:120570-122258	Dead	Fungus	OK	52.4072	41.3583	-0.341587	-0.765641	0.1336	0.230007	no	related to diphthamide synthesis protein DPH2	PF01866|Diphthamide_syn;	NA	NA	NA	NA	NA	NA	NA	Ophio5|2555	0.716	694.886	0	0.9942	72.5231	41.8241	50.3438	PF01866.12|Diphthamide_syn	GO:0005737|cytoplasm;GO:0017183|peptidyl-diphthamide biosynthetic process from peptidyl-histidine	NA	NA	NA	NA	NA	NA	NA	Down	0.0117917	No	Down	0.111715	No	Up	0.452575	No
Ophcf2|00046	scaffold_01:122815-123287	Dead	Fungus	OK	42.1004	63.7032	0.59753	0.815761	0.10085	0.184304	no	membrane-associating domain-containing protein	NA	NA	NA	NA	NA	NA	NA	3;	Ophio5|2554	0.866	162.54	9.7e-53	0.9798	115.39	77.3347	86.9598	NA	NA	NA	NA	NA	4	NA	NA	NA	Down	0.0999616	No	Down	0.24286	No	Up	0.675542	No
Ophcf2|00046	scaffold_01:122815-123287	Alive	Fungus	OK	29.0558	63.7032	1.13254	1.4873	0.0044	0.0132258	yes	membrane-associating domain-containing protein	NA	NA	NA	NA	NA	NA	NA	3;	Ophio5|2554	0.866	162.54	9.7e-53	0.9798	115.39	77.3347	86.9598	NA	NA	NA	NA	NA	4	NA	NA	NA	Down	0.0999616	No	Down	0.24286	No	Up	0.675542	No
Ophcf2|00046	scaffold_01:122815-123287	Alive	Dead	OK	29.0558	42.1004	0.535011	0.678616	0.1168	0.207186	no	membrane-associating domain-containing protein	NA	NA	NA	NA	NA	NA	NA	3;	Ophio5|2554	0.866	162.54	9.7e-53	0.9798	115.39	77.3347	86.9598	NA	NA	NA	NA	NA	4	NA	NA	NA	Down	0.0999616	No	Down	0.24286	No	Up	0.675542	No
Ophcf2|00047	scaffold_01:123742-124311	Alive	Dead	OK	693.722	564.003	-0.298656	-0.595605	0.17505	0.284925	no	predicted protein	PF01284|MARVEL;	NA	NA	NA	GO:0005575|cellular_component; GO:0016020|membrane;	NA	NA	4;	Ophio5|2553	0.758	218.394	3.06e-74	0.988	393.101	403.351	588.411	PF01284.18|MARVEL	GO:0016020|membrane	NA	NA	NA	4	NA	NA	NA	Up	0.930546	No	Up	0.0811965	No	Up	0.111637	No
Ophcf2|00047	scaffold_01:123742-124311	Dead	Fungus	OK	564.003	106.282	-2.40781	-5.02772	5e-05	0.000237974	yes	predicted protein	PF01284|MARVEL;	NA	NA	NA	GO:0005575|cellular_component; GO:0016020|membrane;	NA	NA	4;	Ophio5|2553	0.758	218.394	3.06e-74	0.988	393.101	403.351	588.411	PF01284.18|MARVEL	GO:0016020|membrane	NA	NA	NA	4	NA	NA	NA	Up	0.930546	No	Up	0.0811965	No	Up	0.111637	No
Ophcf2|00047	scaffold_01:123742-124311	Alive	Fungus	OK	693.722	106.282	-2.70646	-5.18729	5e-05	0.000237974	yes	predicted protein	PF01284|MARVEL;	NA	NA	NA	GO:0005575|cellular_component; GO:0016020|membrane;	NA	NA	4;	Ophio5|2553	0.758	218.394	3.06e-74	0.988	393.101	403.351	588.411	PF01284.18|MARVEL	GO:0016020|membrane	NA	NA	NA	4	NA	NA	NA	Up	0.930546	No	Up	0.0811965	No	Up	0.111637	No
Ophcf2|00048	scaffold_01:125545-126215	Alive	Dead	OK	13.2553	23.3923	0.819464	1.12865	0.0066	0.0188534	yes	minor allergen Alt a 7	PF02525|Flavodoxin_2; PF03358|FMN_red;	NA	NA	NA	GO:0003824|catalytic activity; GO:0016491|oxidoreductase activity; GO:0003674|molecular_function;	NA	NA	NA	Ophio5|2552	0.849	282.722	4.34e-99	0.7783	4791.42	828.42	501.668	PF00258.20|Flavodoxin_1;PF03358.10|FMN_red;PF02525.12|Flavodoxin_2	GO:0016491|oxidoreductase activity;GO:0010181|FMN binding	NA	NA	NA	NA	NA	NA	NA	Down	0.000285532	Yes	Down	0.000285532	Yes	Down	0.165001	No
Ophcf2|00048	scaffold_01:125545-126215	Alive	Fungus	OK	13.2553	6.85063	-0.952259	-1.21864	0.0167	0.0417307	yes	minor allergen Alt a 7	PF02525|Flavodoxin_2; PF03358|FMN_red;	NA	NA	NA	GO:0003824|catalytic activity; GO:0016491|oxidoreductase activity; GO:0003674|molecular_function;	NA	NA	NA	Ophio5|2552	0.849	282.722	4.34e-99	0.7783	4791.42	828.42	501.668	PF00258.20|Flavodoxin_1;PF03358.10|FMN_red;PF02525.12|Flavodoxin_2	GO:0016491|oxidoreductase activity;GO:0010181|FMN binding	NA	NA	NA	NA	NA	NA	NA	Down	0.000285532	Yes	Down	0.000285532	Yes	Down	0.165001	No
Ophcf2|00048	scaffold_01:125545-126215	Dead	Fungus	OK	23.3923	6.85063	-1.77172	-2.35648	5e-05	0.000237974	yes	minor allergen Alt a 7	PF02525|Flavodoxin_2; PF03358|FMN_red;	NA	NA	NA	GO:0003824|catalytic activity; GO:0016491|oxidoreductase activity; GO:0003674|molecular_function;	NA	NA	NA	Ophio5|2552	0.849	282.722	4.34e-99	0.7783	4791.42	828.42	501.668	PF00258.20|Flavodoxin_1;PF03358.10|FMN_red;PF02525.12|Flavodoxin_2	GO:0016491|oxidoreductase activity;GO:0010181|FMN binding	NA	NA	NA	NA	NA	NA	NA	Down	0.000285532	Yes	Down	0.000285532	Yes	Down	0.165001	No
Ophcf2|00049	scaffold_01:126555-127785	Alive	Dead	OK	7.45155	8.39939	0.172744	0.256231	0.56445	0.687708	no	glycerophosphoryl diester phosphodiesterase	PF03009|GDPD;	Has signal peptide;	NA	NA	GO:0003824|catalytic activity; GO:0016787|hydrolase activity; GO:0008081|phosphoric diester hydrolase activity; GO:0003674|molecular_function; GO:0016788|hydrolase activity, acting on ester bonds; GO:0008150|biological_process; GO:0071704|organic substance metabolic process; GO:0006629|lipid metabolic process; GO:0044238|primary metabolic process; GO:0042578|phosphoric ester hydrolase activity; G…	NA	NA	NA	Ophio5|2551	0.779	660.603	0	0.9756	37.889	24.1411	58.0242	PF03009.12|GDPD	GO:0008889|glycerophosphodiester phosphodiesterase activity;GO:0006071|glycerol metabolic process	NA	NA	NA	NA	NA	NA	NA	Down	0.0710963	No	Up	0.0700694	No	Up	0.000285532	Yes
Ophcf2|00049	scaffold_01:126555-127785	Alive	Fungus	OK	7.45155	10.809	0.536619	0.818194	0.1134	0.20247	no	glycerophosphoryl diester phosphodiesterase	PF03009|GDPD;	Has signal peptide;	NA	NA	GO:0003824|catalytic activity; GO:0016787|hydrolase activity; GO:0008081|phosphoric diester hydrolase activity; GO:0003674|molecular_function; GO:0016788|hydrolase activity, acting on ester bonds; GO:0008150|biological_process; GO:0071704|organic substance metabolic process; GO:0006629|lipid metabolic process; GO:0044238|primary metabolic process; GO:0042578|phosphoric ester hydrolase activity; G…	NA	NA	NA	Ophio5|2551	0.779	660.603	0	0.9756	37.889	24.1411	58.0242	PF03009.12|GDPD	GO:0008889|glycerophosphodiester phosphodiesterase activity;GO:0006071|glycerol metabolic process	NA	NA	NA	NA	NA	NA	NA	Down	0.0710963	No	Up	0.0700694	No	Up	0.000285532	Yes
Ophcf2|00049	scaffold_01:126555-127785	Dead	Fungus	OK	8.39939	10.809	0.363875	0.569644	0.2595	0.386615	no	glycerophosphoryl diester phosphodiesterase	PF03009|GDPD;	Has signal peptide;	NA	NA	GO:0003824|catalytic activity; GO:0016787|hydrolase activity; GO:0008081|phosphoric diester hydrolase activity; GO:0003674|molecular_function; GO:0016788|hydrolase activity, acting on ester bonds; GO:0008150|biological_process; GO:0071704|organic substance metabolic process; GO:0006629|lipid metabolic process; GO:0044238|primary metabolic process; GO:0042578|phosphoric ester hydrolase activity; G…	NA	NA	NA	Ophio5|2551	0.779	660.603	0	0.9756	37.889	24.1411	58.0242	PF03009.12|GDPD	GO:0008889|glycerophosphodiester phosphodiesterase activity;GO:0006071|glycerol metabolic process	NA	NA	NA	NA	NA	NA	NA	Down	0.0710963	No	Up	0.0700694	No	Up	0.000285532	Yes
Ophcf2|00050	scaffold_01:128115-129623	Alive	Fungus	OK	13.4757	33.5298	1.31508	2.4345	5e-05	0.000237974	yes	glycoside hydrolase family 18 protein	PF00704|Glyco_hydro_18;	Has signal peptide;	NA	NA	GO:0008150|biological_process; GO:0005975|carbohydrate metabolic process; GO:0071704|organic substance metabolic process; GO:0044238|primary metabolic process; GO:0008152|metabolic process;	NA	NA	1;	Ophio5|2550	0.773	575.089	0	0.8405	28.1577	14.8532	25.2848	PF00704.23|Glyco_hydro_18	GO:0005975|carbohydrate metabolic process;GO:0004553|hydrolase activity, hydrolyzing O-glycosyl compounds	NA	SignalP: has predicted secretion signal	NA	1	NA	NA	NA	Down	0.0207994	No	Down	0.729335	No	Up	0.0542983	No
Ophcf2|00050	scaffold_01:128115-129623	Alive	Dead	OK	13.4757	17.629	0.387593	0.675401	0.12275	0.215087	no	glycoside hydrolase family 18 protein	PF00704|Glyco_hydro_18;	Has signal peptide;	NA	NA	GO:0008150|biological_process; GO:0005975|carbohydrate metabolic process; GO:0071704|organic substance metabolic process; GO:0044238|primary metabolic process; GO:0008152|metabolic process;	NA	NA	1;	Ophio5|2550	0.773	575.089	0	0.8405	28.1577	14.8532	25.2848	PF00704.23|Glyco_hydro_18	GO:0005975|carbohydrate metabolic process;GO:0004553|hydrolase activity, hydrolyzing O-glycosyl compounds	NA	SignalP: has predicted secretion signal	NA	1	NA	NA	NA	Down	0.0207994	No	Down	0.729335	No	Up	0.0542983	No
Ophcf2|00050	scaffold_01:128115-129623	Dead	Fungus	OK	17.629	33.5298	0.927492	1.78298	0.00055	0.00211659	yes	glycoside hydrolase family 18 protein	PF00704|Glyco_hydro_18;	Has signal peptide;	NA	NA	GO:0008150|biological_process; GO:0005975|carbohydrate metabolic process; GO:0071704|organic substance metabolic process; GO:0044238|primary metabolic process; GO:0008152|metabolic process;	NA	NA	1;	Ophio5|2550	0.773	575.089	0	0.8405	28.1577	14.8532	25.2848	PF00704.23|Glyco_hydro_18	GO:0005975|carbohydrate metabolic process;GO:0004553|hydrolase activity, hydrolyzing O-glycosyl compounds	NA	SignalP: has predicted secretion signal	NA	1	NA	NA	NA	Down	0.0207994	No	Down	0.729335	No	Up	0.0542983	No
Ophcf2|00051	scaffold_01:130353-131745	Dead	Fungus	OK	69.2845	67.506	-0.0375179	-0.0850916	0.8672	0.914426	no	WD repeat-containing protein JIP5	NA	NA	NA	NA	NA	NA	NA	NA	Ophio5|2549	0.815	665.611	0	0.9976	37.7657	36.5155	59.4132	PF00400.27|WD40;PF00400.27|WD40	GO:0005515|protein binding	NA	NA	NA	NA	NA	NA	NA	Down	0.913571	No	Up	0.0432904	No	Up	0.0402345	No
Ophcf2|00051	scaffold_01:130353-131745	Alive	Dead	OK	49.7123	69.2845	0.47893	1.05954	0.0158	0.0398603	yes	WD repeat-containing protein JIP5	NA	NA	NA	NA	NA	NA	NA	NA	Ophio5|2549	0.815	665.611	0	0.9976	37.7657	36.5155	59.4132	PF00400.27|WD40;PF00400.27|WD40	GO:0005515|protein binding	NA	NA	NA	NA	NA	NA	NA	Down	0.913571	No	Up	0.0432904	No	Up	0.0402345	No
Ophcf2|00051	scaffold_01:130353-131745	Alive	Fungus	OK	49.7123	67.506	0.441412	0.980073	0.05175	0.107208	no	WD repeat-containing protein JIP5	NA	NA	NA	NA	NA	NA	NA	NA	Ophio5|2549	0.815	665.611	0	0.9976	37.7657	36.5155	59.4132	PF00400.27|WD40;PF00400.27|WD40	GO:0005515|protein binding	NA	NA	NA	NA	NA	NA	NA	Down	0.913571	No	Up	0.0432904	No	Up	0.0402345	No
Ophcf2|00052	scaffold_01:132265-133204	Alive	Dead	OK	36.1293	76.5212	1.08269	2.13576	5e-05	0.000237974	yes	maleylacetate reductase	PF00465|Fe-ADH;	NA	NA	NA	GO:0003824|catalytic activity; GO:0005488|binding; GO:0055114|oxidation-reduction process; GO:0046872|metal ion binding; GO:0016491|oxidoreductase activity; GO:0003674|molecular_function; GO:0008150|biological_process; GO:0043167|ion binding; GO:0043169|cation binding; GO:0008152|metabolic process;	NA	NA	NA	Ophio5|2548	0.733	301.597	4.9e-101	0.7444	89.3412	44.3238	93.7491	PF00465.14|Fe-ADH	GO:0016491|oxidoreductase activity;GO:0046872|metal ion binding;GO:0055114|oxidation-reduction process	NA	NA	NA	NA	NA	NA	NA	Down	0.00204693	Yes	Up	0.870467	No	Up	0.000535012	Yes
Ophcf2|00052	scaffold_01:132265-133204	Alive	Fungus	OK	36.1293	38.6928	0.0988965	0.191031	0.71155	0.805465	no	maleylacetate reductase	PF00465|Fe-ADH;	NA	NA	NA	GO:0003824|catalytic activity; GO:0005488|binding; GO:0055114|oxidation-reduction process; GO:0046872|metal ion binding; GO:0016491|oxidoreductase activity; GO:0003674|molecular_function; GO:0008150|biological_process; GO:0043167|ion binding; GO:0043169|cation binding; GO:0008152|metabolic process;	NA	NA	NA	Ophio5|2548	0.733	301.597	4.9e-101	0.7444	89.3412	44.3238	93.7491	PF00465.14|Fe-ADH	GO:0016491|oxidoreductase activity;GO:0046872|metal ion binding;GO:0055114|oxidation-reduction process	NA	NA	NA	NA	NA	NA	NA	Down	0.00204693	Yes	Up	0.870467	No	Up	0.000535012	Yes
Ophcf2|00052	scaffold_01:132265-133204	Dead	Fungus	OK	76.5212	38.6928	-0.983794	-1.97945	0.0002	0.000851223	yes	maleylacetate reductase	PF00465|Fe-ADH;	NA	NA	NA	GO:0003824|catalytic activity; GO:0005488|binding; GO:0055114|oxidation-reduction process; GO:0046872|metal ion binding; GO:0016491|oxidoreductase activity; GO:0003674|molecular_function; GO:0008150|biological_process; GO:0043167|ion binding; GO:0043169|cation binding; GO:0008152|metabolic process;	NA	NA	NA	Ophio5|2548	0.733	301.597	4.9e-101	0.7444	89.3412	44.3238	93.7491	PF00465.14|Fe-ADH	GO:0016491|oxidoreductase activity;GO:0046872|metal ion binding;GO:0055114|oxidation-reduction process	NA	NA	NA	NA	NA	NA	NA	Down	0.00204693	Yes	Up	0.870467	No	Up	0.000535012	Yes
Ophcf2|00053	scaffold_01:134189-136466	Alive	Dead	OK	62.5623	59.7708	-0.0658526	-0.147347	0.7422	0.828593	no	mRNA capping enzyme, beta subunit, structural domain protein	PF02940|mRNA_triPase;	NA	NA	NA	GO:0003824|catalytic activity; GO:0004651|polynucleotide 5'-phosphatase activity; GO:0016787|hydrolase activity; GO:0003674|molecular_function; GO:0016788|hydrolase activity, acting on ester bonds; GO:0098518|polynucleotide phosphatase activity; GO:0016791|phosphatase activity; GO:0042578|phosphoric ester hydrolase activity;	NA	NA	NA	Ophio5|2547	0.75	906.36	0	0.9986	52.8213	84.2775	71.9941	PF02940.10|mRNA_triPase	GO:0004651|polynucleotide 5'-phosphatase activity;GO:0016740|transferase activity	NA	NA	NA	NA	NA	NA	NA	Up	0.0422979	No	Up	0.191408	No	Down	0.546229	No
Ophcf2|00053	scaffold_01:134189-136466	Dead	Fungus	OK	59.7708	46.4267	-0.364485	-0.832215	0.1059	0.191633	no	mRNA capping enzyme, beta subunit, structural domain protein	PF02940|mRNA_triPase;	NA	NA	NA	GO:0003824|catalytic activity; GO:0004651|polynucleotide 5'-phosphatase activity; GO:0016787|hydrolase activity; GO:0003674|molecular_function; GO:0016788|hydrolase activity, acting on ester bonds; GO:0098518|polynucleotide phosphatase activity; GO:0016791|phosphatase activity; GO:0042578|phosphoric ester hydrolase activity;	NA	NA	NA	Ophio5|2547	0.75	906.36	0	0.9986	52.8213	84.2775	71.9941	PF02940.10|mRNA_triPase	GO:0004651|polynucleotide 5'-phosphatase activity;GO:0016740|transferase activity	NA	NA	NA	NA	NA	NA	NA	Up	0.0422979	No	Up	0.191408	No	Down	0.546229	No
Ophcf2|00053	scaffold_01:134189-136466	Alive	Fungus	OK	62.5623	46.4267	-0.430337	-0.971236	0.06025	0.121197	no	mRNA capping enzyme, beta subunit, structural domain protein	PF02940|mRNA_triPase;	NA	NA	NA	GO:0003824|catalytic activity; GO:0004651|polynucleotide 5'-phosphatase activity; GO:0016787|hydrolase activity; GO:0003674|molecular_function; GO:0016788|hydrolase activity, acting on ester bonds; GO:0098518|polynucleotide phosphatase activity; GO:0016791|phosphatase activity; GO:0042578|phosphoric ester hydrolase activity;	NA	NA	NA	Ophio5|2547	0.75	906.36	0	0.9986	52.8213	84.2775	71.9941	PF02940.10|mRNA_triPase	GO:0004651|polynucleotide 5'-phosphatase activity;GO:0016740|transferase activity	NA	NA	NA	NA	NA	NA	NA	Up	0.0422979	No	Up	0.191408	No	Down	0.546229	No
Ophcf2|00054	scaffold_01:138150-141804	Dead	Fungus	OK	50.5151	76.0896	0.590984	1.25596	0.0152	0.0385995	yes	26S proteasome regulatory subunit rpn2	PF13646|HEAT_2; PF01851|PC_rep; PF18004|RPN2_C;	NA	NA	NA	NA	NA	NA	NA	Ophio5|2546	0.904	2073.13	0	0.9991	70.6783	81.691	100.447	PF01851.17|PC_rep;PF01851.17|PC_rep;PF01851.17|PC_rep;PF13646.1|HEAT_2;PF13513.1|HEAT_EZ	NA	NA	NA	NA	NA	NA	NA	NA	Up	0.605072	No	Up	0.179882	No	Up	0.450663	No
Ophcf2|00054	scaffold_01:138150-141804	Alive	Dead	OK	44.6207	50.5151	0.179001	0.395384	0.36925	0.506275	no	26S proteasome regulatory subunit rpn2	PF13646|HEAT_2; PF01851|PC_rep; PF18004|RPN2_C;	NA	NA	NA	NA	NA	NA	NA	Ophio5|2546	0.904	2073.13	0	0.9991	70.6783	81.691	100.447	PF01851.17|PC_rep;PF01851.17|PC_rep;PF01851.17|PC_rep;PF13646.1|HEAT_2;PF13513.1|HEAT_EZ	NA	NA	NA	NA	NA	NA	NA	NA	Up	0.605072	No	Up	0.179882	No	Up	0.450663	No
Ophcf2|00054	scaffold_01:138150-141804	Alive	Fungus	OK	44.6207	76.0896	0.769985	1.64078	0.0016	0.00543325	yes	26S proteasome regulatory subunit rpn2	PF13646|HEAT_2; PF01851|PC_rep; PF18004|RPN2_C;	NA	NA	NA	NA	NA	NA	NA	Ophio5|2546	0.904	2073.13	0	0.9991	70.6783	81.691	100.447	PF01851.17|PC_rep;PF01851.17|PC_rep;PF01851.17|PC_rep;PF13646.1|HEAT_2;PF13513.1|HEAT_EZ	NA	NA	NA	NA	NA	NA	NA	NA	Up	0.605072	No	Up	0.179882	No	Up	0.450663	No
Ophcf2|00055	scaffold_01:142178-144116	Dead	Fungus	OK	124.358	179.044	0.525814	1.07349	0.0352	0.0780814	no	Sulfite oxidase	PF00174|Oxidored_molyb; PF03404|Mo-co_dimer; PF00173|Cyt-b5;	NA	NA	NA	GO:0043436|oxoacid metabolic process; GO:0003674|molecular_function; GO:0071704|organic substance metabolic process; GO:0009987|cellular process; GO:0005488|binding; GO:0055114|oxidation-reduction process; GO:0006807|nitrogen compound metabolic process; GO:0044237|cellular metabolic process; GO:0006082|organic acid metabolic process; GO:0043167|ion binding; GO:0003824|catalytic activity; GO:00164…	NA	NA	NA	Ophio5|2545	0.752	954.896	0	0.9969	177.723	530.631	189.132	PF00174.14|Oxidored_molyb;PF03404.11|Mo-co_dimer;PF03404.11|Mo-co_dimer;PF00173.23|Cyt-b5	GO:0016491|oxidoreductase activity;GO:0030151|molybdenum ion binding;GO:0009055|electron carrier activity;GO:0055114|oxidation-reduction process;GO:0020037|heme binding	NA	NA	NA	NA	NA	NA	NA	Up	0.000770107	Yes	Up	0.845655	No	Down	0.00223648	Yes
Ophcf2|00055	scaffold_01:142178-144116	Alive	Dead	OK	178.457	124.358	-0.521073	-1.04816	0.02035	0.0493534	yes	Sulfite oxidase	PF00174|Oxidored_molyb; PF03404|Mo-co_dimer; PF00173|Cyt-b5;	NA	NA	NA	GO:0043436|oxoacid metabolic process; GO:0003674|molecular_function; GO:0071704|organic substance metabolic process; GO:0009987|cellular process; GO:0005488|binding; GO:0055114|oxidation-reduction process; GO:0006807|nitrogen compound metabolic process; GO:0044237|cellular metabolic process; GO:0006082|organic acid metabolic process; GO:0043167|ion binding; GO:0003824|catalytic activity; GO:00164…	NA	NA	NA	Ophio5|2545	0.752	954.896	0	0.9969	177.723	530.631	189.132	PF00174.14|Oxidored_molyb;PF03404.11|Mo-co_dimer;PF03404.11|Mo-co_dimer;PF00173.23|Cyt-b5	GO:0016491|oxidoreductase activity;GO:0030151|molybdenum ion binding;GO:0009055|electron carrier activity;GO:0055114|oxidation-reduction process;GO:0020037|heme binding	NA	NA	NA	NA	NA	NA	NA	Up	0.000770107	Yes	Up	0.845655	No	Down	0.00223648	Yes
Ophcf2|00055	scaffold_01:142178-144116	Alive	Fungus	OK	178.457	179.044	0.00474077	0.00931523	0.98625	0.991952	no	Sulfite oxidase	PF00174|Oxidored_molyb; PF03404|Mo-co_dimer; PF00173|Cyt-b5;	NA	NA	NA	GO:0043436|oxoacid metabolic process; GO:0003674|molecular_function; GO:0071704|organic substance metabolic process; GO:0009987|cellular process; GO:0005488|binding; GO:0055114|oxidation-reduction process; GO:0006807|nitrogen compound metabolic process; GO:0044237|cellular metabolic process; GO:0006082|organic acid metabolic process; GO:0043167|ion binding; GO:0003824|catalytic activity; GO:00164…	NA	NA	NA	Ophio5|2545	0.752	954.896	0	0.9969	177.723	530.631	189.132	PF00174.14|Oxidored_molyb;PF03404.11|Mo-co_dimer;PF03404.11|Mo-co_dimer;PF00173.23|Cyt-b5	GO:0016491|oxidoreductase activity;GO:0030151|molybdenum ion binding;GO:0009055|electron carrier activity;GO:0055114|oxidation-reduction process;GO:0020037|heme binding	NA	NA	NA	NA	NA	NA	NA	Up	0.000770107	Yes	Up	0.845655	No	Down	0.00223648	Yes
Ophcf2|00056	scaffold_01:145255-146862	Alive	Dead	OK	36.2336	28.7385	-0.334343	-0.683264	0.12085	0.212534	no	F-box domain-containing protein	PF12014|DUF3506; PF00646|F-box;	NA	NA	NA	GO:0003674|molecular_function; GO:0005488|binding; GO:0005515|protein binding;	NA	NA	NA	Ophio5|2544	0.698	665.226	0	0.9329	52.6366	70.3903	27.2699	PF12014.3|DUF3506	NA	NA	NA	NA	NA	NA	NA	NA	Up	0.248502	No	Down	0.00393484	No	Down	0.000285532	Yes
Ophcf2|00056	scaffold_01:145255-146862	Alive	Fungus	OK	36.2336	63.9985	0.82071	1.76269	0.00105	0.00374851	yes	F-box domain-containing protein	PF12014|DUF3506; PF00646|F-box;	NA	NA	NA	GO:0003674|molecular_function; GO:0005488|binding; GO:0005515|protein binding;	NA	NA	NA	Ophio5|2544	0.698	665.226	0	0.9329	52.6366	70.3903	27.2699	PF12014.3|DUF3506	NA	NA	NA	NA	NA	NA	NA	NA	Up	0.248502	No	Down	0.00393484	No	Down	0.000285532	Yes
Ophcf2|00056	scaffold_01:145255-146862	Dead	Fungus	OK	28.7385	63.9985	1.15505	2.51935	5e-05	0.000237974	yes	F-box domain-containing protein	PF12014|DUF3506; PF00646|F-box;	NA	NA	NA	GO:0003674|molecular_function; GO:0005488|binding; GO:0005515|protein binding;	NA	NA	NA	Ophio5|2544	0.698	665.226	0	0.9329	52.6366	70.3903	27.2699	PF12014.3|DUF3506	NA	NA	NA	NA	NA	NA	NA	NA	Up	0.248502	No	Down	0.00393484	No	Down	0.000285532	Yes
Ophcf2|00057	scaffold_01:147993-149068	Alive	Fungus	OK	10.978	41.0189	1.90167	3.14955	5e-05	0.000237974	yes	UPF0590 protein	PF08588|DUF1769;	NA	NA	NA	NA	NA	NA	NA	Ophio5|2543	0.72	463.381	1.58e-166	0.9968	86.03	175.576	81.1232	PF08588.5|DUF1769	NA	NA	NA	NA	NA	NA	NA	NA	Up	0.00143681	Yes	Down	0.829604	No	Down	0.000285532	Yes
Ophcf2|00057	scaffold_01:147993-149068	Alive	Dead	OK	10.978	14.1565	0.366847	0.554788	0.20595	0.323998	no	UPF0590 protein	PF08588|DUF1769;	NA	NA	NA	NA	NA	NA	NA	Ophio5|2543	0.72	463.381	1.58e-166	0.9968	86.03	175.576	81.1232	PF08588.5|DUF1769	NA	NA	NA	NA	NA	NA	NA	NA	Up	0.00143681	Yes	Down	0.829604	No	Down	0.000285532	Yes
Ophcf2|00057	scaffold_01:147993-149068	Dead	Fungus	OK	14.1565	41.0189	1.53483	2.69509	5e-05	0.000237974	yes	UPF0590 protein	PF08588|DUF1769;	NA	NA	NA	NA	NA	NA	NA	Ophio5|2543	0.72	463.381	1.58e-166	0.9968	86.03	175.576	81.1232	PF08588.5|DUF1769	NA	NA	NA	NA	NA	NA	NA	NA	Up	0.00143681	Yes	Down	0.829604	No	Down	0.000285532	Yes
Ophcf2|00058	scaffold_01:149385-150298	Alive	Fungus	OK	13.1424	37.6657	1.51902	2.53026	5e-05	0.000237974	yes	drug transporter	NA	Has signal peptide;	NA	NA	NA	NA	NA	1;	Ophio5|2542	0.594	284.648	1.52e-96	0.9298	5.28138	13.8545	5.34251	NA	NA	NA	NA	NA	1	NA	NA	NA	Up	0.00981662	Yes	Up	0.986484	No	Down	0.00934678	Yes
Ophcf2|00058	scaffold_01:149385-150298	Alive	Dead	OK	13.1424	17.9693	0.451308	0.703782	0.10635	0.192221	no	drug transporter	NA	Has signal peptide;	NA	NA	NA	NA	NA	1;	Ophio5|2542	0.594	284.648	1.52e-96	0.9298	5.28138	13.8545	5.34251	NA	NA	NA	NA	NA	1	NA	NA	NA	Up	0.00981662	Yes	Up	0.986484	No	Down	0.00934678	Yes
Ophcf2|00058	scaffold_01:149385-150298	Dead	Fungus	OK	17.9693	37.6657	1.06772	1.86606	0.0006	0.00228657	yes	drug transporter	NA	Has signal peptide;	NA	NA	NA	NA	NA	1;	Ophio5|2542	0.594	284.648	1.52e-96	0.9298	5.28138	13.8545	5.34251	NA	NA	NA	NA	NA	1	NA	NA	NA	Up	0.00981662	Yes	Up	0.986484	No	Down	0.00934678	Yes
Ophcf2|00059	scaffold_01:150695-152482	Alive	Dead	OK	26.2468	31.1913	0.249003	0.520155	0.2436	0.368811	no	Major facilitator superfamily domain, general substrate transporter	PF00083|Sugar_tr; PF07690|MFS_1;	NA	NA	NA	GO:0051234|establishment of localization; GO:0005575|cellular_component; GO:0022857|transmembrane transporter activity; GO:0044425|membrane part; GO:0016021|integral component of membrane; GO:0006810|transport; GO:0008150|biological_process; GO:0031224|intrinsic component of membrane; GO:0003674|molecular_function; GO:0051179|localization; GO:0005215|transporter activity; GO:0055085|transmembrane…	NA	NA	11;	Ophio5|7533	0.252	130.568	1.18e-32	0.8958	40.2215	20.679	14.3755	PF07690.11|MFS_1;PF00083.19|Sugar_tr	GO:0016021|integral component of membrane;GO:0055085|transmembrane transport;GO:0022857|transmembrane transporter activity	NA	NA	NA	10	NA	NA	NA	Down	0.00618144	No	Down	0.000285532	Yes	Down	0.210367	No
Ophcf2|00059	scaffold_01:150695-152482	Dead	Fungus	OK	31.1913	48.9452	0.650022	1.4436	0.00395	0.0120222	yes	Major facilitator superfamily domain, general substrate transporter	PF00083|Sugar_tr; PF07690|MFS_1;	NA	NA	NA	GO:0051234|establishment of localization; GO:0005575|cellular_component; GO:0022857|transmembrane transporter activity; GO:0044425|membrane part; GO:0016021|integral component of membrane; GO:0006810|transport; GO:0008150|biological_process; GO:0031224|intrinsic component of membrane; GO:0003674|molecular_function; GO:0051179|localization; GO:0005215|transporter activity; GO:0055085|transmembrane…	NA	NA	11;	Ophio5|7533	0.252	130.568	1.18e-32	0.8958	40.2215	20.679	14.3755	PF07690.11|MFS_1;PF00083.19|Sugar_tr	GO:0016021|integral component of membrane;GO:0055085|transmembrane transport;GO:0022857|transmembrane transporter activity	NA	NA	NA	10	NA	NA	NA	Down	0.00618144	No	Down	0.000285532	Yes	Down	0.210367	No
Ophcf2|00059	scaffold_01:150695-152482	Alive	Fungus	OK	26.2468	48.9452	0.899025	1.92458	0.0002	0.000851223	yes	Major facilitator superfamily domain, general substrate transporter	PF00083|Sugar_tr; PF07690|MFS_1;	NA	NA	NA	GO:0051234|establishment of localization; GO:0005575|cellular_component; GO:0022857|transmembrane transporter activity; GO:0044425|membrane part; GO:0016021|integral component of membrane; GO:0006810|transport; GO:0008150|biological_process; GO:0031224|intrinsic component of membrane; GO:0003674|molecular_function; GO:0051179|localization; GO:0005215|transporter activity; GO:0055085|transmembrane…	NA	NA	11;	Ophio5|7533	0.252	130.568	1.18e-32	0.8958	40.2215	20.679	14.3755	PF07690.11|MFS_1;PF00083.19|Sugar_tr	GO:0016021|integral component of membrane;GO:0055085|transmembrane transport;GO:0022857|transmembrane transporter activity	NA	NA	NA	10	NA	NA	NA	Down	0.00618144	No	Down	0.000285532	Yes	Down	0.210367	No
Ophcf2|00060	scaffold_01:152518-153163	Dead	Fungus	OK	53.412	99.2366	0.89371	1.6244	0.00265	0.00846195	yes	DUF757 domain-containing protein	PF04669|Polysacc_synt_4;	NA	NA	NA	NA	NA	NA	NA	Ophio5|2540	0.892	300.827	4.62e-106	0.9753	58.4818	213.517	112.092	PF04669.8|Polysacc_synt_4	NA	NA	NA	NA	NA	NA	NA	NA	Up	0.000285532	Yes	Up	0.00601648	No	Down	0.00778228	No
Ophcf2|00060	scaffold_01:152518-153163	Alive	Fungus	OK	51.669	99.2366	0.941574	1.66358	0.0018	0.00602701	yes	DUF757 domain-containing protein	PF04669|Polysacc_synt_4;	NA	NA	NA	NA	NA	NA	NA	Ophio5|2540	0.892	300.827	4.62e-106	0.9753	58.4818	213.517	112.092	PF04669.8|Polysacc_synt_4	NA	NA	NA	NA	NA	NA	NA	NA	Up	0.000285532	Yes	Up	0.00601648	No	Down	0.00778228	No
Ophcf2|00060	scaffold_01:152518-153163	Alive	Dead	OK	51.669	53.412	0.0478645	0.079828	0.85965	0.909756	no	DUF757 domain-containing protein	PF04669|Polysacc_synt_4;	NA	NA	NA	NA	NA	NA	NA	Ophio5|2540	0.892	300.827	4.62e-106	0.9753	58.4818	213.517	112.092	PF04669.8|Polysacc_synt_4	NA	NA	NA	NA	NA	NA	NA	NA	Up	0.000285532	Yes	Up	0.00601648	No	Down	0.00778228	No
Ophcf2|00061	scaffold_01:154190-159177	Alive	Dead	OK	2.30826	2.40673	0.0602695	0.0908004	0.83355	0.893444	no	ABC a-pheromone efflux pump AtrD	PF00664|ABC_membrane; PF00005|ABC_tran;	NA	NA	NA	GO:0035639|purine ribonucleoside triphosphate binding; GO:0005575|cellular_component; GO:0097159|organic cyclic compound binding; GO:0044425|membrane part; GO:0003674|molecular_function; GO:0042623|ATPase activity, coupled; GO:0032553|ribonucleotide binding; GO:0016887|ATPase activity; GO:0008144|drug binding; GO:0022857|transmembrane transporter activity; GO:0005488|binding; GO:0016787|hydrolase…	NA	NA	9;	Ophio5|4076	0.646	1579.69	0	0.9799	18.9067	13.6033	13.4221	PF00664.18|ABC_membrane;PF00664.18|ABC_membrane;PF00005.22|ABC_tran;PF00005.22|ABC_tran	GO:0016887|ATPase activity;GO:0016021|integral component of membrane;GO:0055085|transmembrane transport;GO:0005524|ATP binding;GO:0042626|ATPase activity, coupled to transmembrane movement of substances;GO:0006810|transport	NA	NA	NA	9	NA	NA	NA	Down	0.160585	No	Down	0.144151	No	Down	0.964294	No
Ophcf2|00061	scaffold_01:154190-159177	Dead	Fungus	OK	2.40673	5.35793	1.1546	1.90076	0.0004	0.00158983	yes	ABC a-pheromone efflux pump AtrD	PF00664|ABC_membrane; PF00005|ABC_tran;	NA	NA	NA	GO:0035639|purine ribonucleoside triphosphate binding; GO:0005575|cellular_component; GO:0097159|organic cyclic compound binding; GO:0044425|membrane part; GO:0003674|molecular_function; GO:0042623|ATPase activity, coupled; GO:0032553|ribonucleotide binding; GO:0016887|ATPase activity; GO:0008144|drug binding; GO:0022857|transmembrane transporter activity; GO:0005488|binding; GO:0016787|hydrolase…	NA	NA	9;	Ophio5|4076	0.646	1579.69	0	0.9799	18.9067	13.6033	13.4221	PF00664.18|ABC_membrane;PF00664.18|ABC_membrane;PF00005.22|ABC_tran;PF00005.22|ABC_tran	GO:0016887|ATPase activity;GO:0016021|integral component of membrane;GO:0055085|transmembrane transport;GO:0005524|ATP binding;GO:0042626|ATPase activity, coupled to transmembrane movement of substances;GO:0006810|transport	NA	NA	NA	9	NA	NA	NA	Down	0.160585	No	Down	0.144151	No	Down	0.964294	No
Ophcf2|00061	scaffold_01:154190-159177	Alive	Fungus	OK	2.30826	5.35793	1.21487	1.98619	0.0002	0.000851223	yes	ABC a-pheromone efflux pump AtrD	PF00664|ABC_membrane; PF00005|ABC_tran;	NA	NA	NA	GO:0035639|purine ribonucleoside triphosphate binding; GO:0005575|cellular_component; GO:0097159|organic cyclic compound binding; GO:0044425|membrane part; GO:0003674|molecular_function; GO:0042623|ATPase activity, coupled; GO:0032553|ribonucleotide binding; GO:0016887|ATPase activity; GO:0008144|drug binding; GO:0022857|transmembrane transporter activity; GO:0005488|binding; GO:0016787|hydrolase…	NA	NA	9;	Ophio5|4076	0.646	1579.69	0	0.9799	18.9067	13.6033	13.4221	PF00664.18|ABC_membrane;PF00664.18|ABC_membrane;PF00005.22|ABC_tran;PF00005.22|ABC_tran	GO:0016887|ATPase activity;GO:0016021|integral component of membrane;GO:0055085|transmembrane transport;GO:0005524|ATP binding;GO:0042626|ATPase activity, coupled to transmembrane movement of substances;GO:0006810|transport	NA	NA	NA	9	NA	NA	NA	Down	0.160585	No	Down	0.144151	No	Down	0.964294	No
Ophcf2|00062	scaffold_01:159447-163156	Alive	Fungus	OK	40.4365	35.4818	-0.188578	-0.425163	0.3978	0.535013	no	calcium-translocating P-type ATPase, PMCA-type	PF00689|Cation_ATPase_C; PF00690|Cation_ATPase_N; PF13246|Cation_ATPase; PF00122|E1-E2_ATPase; PF00702|Hydrolase;	NA	NA	NA	NA	NA	NA	8;	Ophio5|4075	0.842	1903.26	0	0.9818	61.4004	40.0183	44.0434	PF00122.15|E1-E2_ATPase;PF00689.16|Cation_ATPase_C;PF00702.21|Hydrolase;PF13246.1|Hydrolase_like2;PF12710.2|HAD;PF00690.21|Cation_ATPase_N;PF08282.7|Hydrolase_3	GO:0046872|metal ion binding;GO:0000166|nucleotide binding	NA	NA	NA	8	NA	NA	NA	Down	0.0658517	No	Down	0.161916	No	Up	0.718779	No
Ophcf2|00062	scaffold_01:159447-163156	Alive	Dead	OK	40.4365	42.5893	0.0748316	0.166998	0.70285	0.799561	no	calcium-translocating P-type ATPase, PMCA-type	PF00689|Cation_ATPase_C; PF00690|Cation_ATPase_N; PF13246|Cation_ATPase; PF00122|E1-E2_ATPase; PF00702|Hydrolase;	NA	NA	NA	NA	NA	NA	8;	Ophio5|4075	0.842	1903.26	0	0.9818	61.4004	40.0183	44.0434	PF00122.15|E1-E2_ATPase;PF00689.16|Cation_ATPase_C;PF00702.21|Hydrolase;PF13246.1|Hydrolase_like2;PF12710.2|HAD;PF00690.21|Cation_ATPase_N;PF08282.7|Hydrolase_3	GO:0046872|metal ion binding;GO:0000166|nucleotide binding	NA	NA	NA	8	NA	NA	NA	Down	0.0658517	No	Down	0.161916	No	Up	0.718779	No
Ophcf2|00062	scaffold_01:159447-163156	Dead	Fungus	OK	42.5893	35.4818	-0.26341	-0.592134	0.25095	0.377186	no	calcium-translocating P-type ATPase, PMCA-type	PF00689|Cation_ATPase_C; PF00690|Cation_ATPase_N; PF13246|Cation_ATPase; PF00122|E1-E2_ATPase; PF00702|Hydrolase;	NA	NA	NA	NA	NA	NA	8;	Ophio5|4075	0.842	1903.26	0	0.9818	61.4004	40.0183	44.0434	PF00122.15|E1-E2_ATPase;PF00689.16|Cation_ATPase_C;PF00702.21|Hydrolase;PF13246.1|Hydrolase_like2;PF12710.2|HAD;PF00690.21|Cation_ATPase_N;PF08282.7|Hydrolase_3	GO:0046872|metal ion binding;GO:0000166|nucleotide binding	NA	NA	NA	8	NA	NA	NA	Down	0.0658517	No	Down	0.161916	No	Up	0.718779	No
Ophcf2|00063	scaffold_01:165406-166626	Alive	Fungus	OK	27.7288	24.8219	-0.159772	-0.294764	0.564	0.687354	no	Purine nucleoside permease	PF06516|NUP;	NA	NA	NA	GO:0051234|establishment of localization; GO:0006810|transport; GO:0008150|biological_process; GO:0051179|localization; GO:0055085|transmembrane transport;	NA	NA	NA	Ophio5|4074	0.788	601.668	0	0.9973	34.1903	16.6039	14.3248	PF06516.6|NUP	GO:0055085|transmembrane transport	NA	SignalP: has predicted secretion signal	NA	1	NA	NA	NA	Down	0.0087289	Yes	Down	0.000997454	Yes	Down	0.671156	No
Ophcf2|00063	scaffold_01:165406-166626	Dead	Fungus	OK	30.3248	24.8219	-0.288886	-0.548275	0.2856	0.41599	no	Purine nucleoside permease	PF06516|NUP;	NA	NA	NA	GO:0051234|establishment of localization; GO:0006810|transport; GO:0008150|biological_process; GO:0051179|localization; GO:0055085|transmembrane transport;	NA	NA	NA	Ophio5|4074	0.788	601.668	0	0.9973	34.1903	16.6039	14.3248	PF06516.6|NUP	GO:0055085|transmembrane transport	NA	SignalP: has predicted secretion signal	NA	1	NA	NA	NA	Down	0.0087289	Yes	Down	0.000997454	Yes	Down	0.671156	No
Ophcf2|00063	scaffold_01:165406-166626	Alive	Dead	OK	27.7288	30.3248	0.129114	0.243431	0.5742	0.696166	no	Purine nucleoside permease	PF06516|NUP;	NA	NA	NA	GO:0051234|establishment of localization; GO:0006810|transport; GO:0008150|biological_process; GO:0051179|localization; GO:0055085|transmembrane transport;	NA	NA	NA	Ophio5|4074	0.788	601.668	0	0.9973	34.1903	16.6039	14.3248	PF06516.6|NUP	GO:0055085|transmembrane transport	NA	SignalP: has predicted secretion signal	NA	1	NA	NA	NA	Down	0.0087289	Yes	Down	0.000997454	Yes	Down	0.671156	No
Ophcf2|00064	scaffold_01:167653-169924	Dead	Fungus	OK	19.7109	39.1367	0.989526	2.16061	5e-05	0.000237974	yes	calcium-dependent protein kinase	PF00069|Pkinase; PF07714|Pkinase_Tyr;	NA	NA	NA	GO:0035639|purine ribonucleoside triphosphate binding; GO:0006464|cellular protein modification process; GO:0097159|organic cyclic compound binding; GO:0003674|molecular_function; GO:0016772|transferase activity, transferring phosphorus-containing groups; GO:0032553|ribonucleotide binding; GO:0071704|organic substance metabolic process; GO:0009987|cellular process; GO:0016301|kinase activity; GO:…	NA	NA	NA	Ophio5|3194	0.714	959.133	0	0.9749	54.6548	33.0014	35.8796	PF00069.20|Pkinase;PF07714.12|Pkinase_Tyr	GO:0005524|ATP binding;GO:0004672|protein kinase activity;GO:0006468|protein phosphorylation	NA	NA	NA	1	NA	NA	NA	Down	0.0247179	No	Down	0.0623854	No	Up	0.760111	No
Ophcf2|00064	scaffold_01:167653-169924	Alive	Fungus	OK	17.8288	39.1367	1.13431	2.4143	5e-05	0.000237974	yes	calcium-dependent protein kinase	PF00069|Pkinase; PF07714|Pkinase_Tyr;	NA	NA	NA	GO:0035639|purine ribonucleoside triphosphate binding; GO:0006464|cellular protein modification process; GO:0097159|organic cyclic compound binding; GO:0003674|molecular_function; GO:0016772|transferase activity, transferring phosphorus-containing groups; GO:0032553|ribonucleotide binding; GO:0071704|organic substance metabolic process; GO:0009987|cellular process; GO:0016301|kinase activity; GO:…	NA	NA	NA	Ophio5|3194	0.714	959.133	0	0.9749	54.6548	33.0014	35.8796	PF00069.20|Pkinase;PF07714.12|Pkinase_Tyr	GO:0005524|ATP binding;GO:0004672|protein kinase activity;GO:0006468|protein phosphorylation	NA	NA	NA	1	NA	NA	NA	Down	0.0247179	No	Down	0.0623854	No	Up	0.760111	No
Ophcf2|00064	scaffold_01:167653-169924	Alive	Dead	OK	17.8288	19.7109	0.144785	0.295747	0.4994	0.630387	no	calcium-dependent protein kinase	PF00069|Pkinase; PF07714|Pkinase_Tyr;	NA	NA	NA	GO:0035639|purine ribonucleoside triphosphate binding; GO:0006464|cellular protein modification process; GO:0097159|organic cyclic compound binding; GO:0003674|molecular_function; GO:0016772|transferase activity, transferring phosphorus-containing groups; GO:0032553|ribonucleotide binding; GO:0071704|organic substance metabolic process; GO:0009987|cellular process; GO:0016301|kinase activity; GO:…	NA	NA	NA	Ophio5|3194	0.714	959.133	0	0.9749	54.6548	33.0014	35.8796	PF00069.20|Pkinase;PF07714.12|Pkinase_Tyr	GO:0005524|ATP binding;GO:0004672|protein kinase activity;GO:0006468|protein phosphorylation	NA	NA	NA	1	NA	NA	NA	Down	0.0247179	No	Down	0.0623854	No	Up	0.760111	No
Ophcf2|00065	scaffold_01:170597-172284	Alive	Fungus	OK	128.903	301.157	1.22423	2.31372	5e-05	0.000237974	yes	Pyruvate kinase	PF00224|PK; PF02887|PK_C;	NA	NA	NA	GO:0018130|heterocycle biosynthetic process; GO:0006733|oxidoreduction coenzyme metabolic process; GO:0006165|nucleoside diphosphate phosphorylation; GO:0009150|purine ribonucleotide metabolic process; GO:0019362|pyridine nucleotide metabolic process; GO:0009179|purine ribonucleoside diphosphate metabolic process; GO:0006807|nitrogen compound metabolic process; GO:0006754|ATP biosynthetic process…	NA	NA	NA	Ophio5|3193	0.919	1039.25	0	0.9852	85.4268	53.4829	107.072	PF00224.16|PK;PF00005.22|ABC_tran;PF00005.22|ABC_tran;PF00664.18|ABC_membrane;PF00664.18|ABC_membrane;PF02887.11|PK_C	GO:0016887|ATPase activity;GO:0016021|integral component of membrane;GO:0006096|glycolytic process;GO:0005524|ATP binding;GO:0004743|pyruvate kinase activity;GO:0000287|magnesium ion binding;GO:0042626|ATPase activity, coupled to transmembrane movement of substances;GO:0030955|potassium ion binding;GO:0055085|transmembrane transport;GO:0006810|transport	NA	NA	NA	12	NA	NA	NA	Down	0.0795296	No	Up	0.463	No	Up	0.00584804	Yes
Ophcf2|00065	scaffold_01:170597-172284	Dead	Fungus	OK	121.116	301.157	1.31413	2.6523	5e-05	0.000237974	yes	Pyruvate kinase	PF00224|PK; PF02887|PK_C;	NA	NA	NA	GO:0018130|heterocycle biosynthetic process; GO:0006733|oxidoreduction coenzyme metabolic process; GO:0006165|nucleoside diphosphate phosphorylation; GO:0009150|purine ribonucleotide metabolic process; GO:0019362|pyridine nucleotide metabolic process; GO:0009179|purine ribonucleoside diphosphate metabolic process; GO:0006807|nitrogen compound metabolic process; GO:0006754|ATP biosynthetic process…	NA	NA	NA	Ophio5|3193	0.919	1039.25	0	0.9852	85.4268	53.4829	107.072	PF00224.16|PK;PF00005.22|ABC_tran;PF00005.22|ABC_tran;PF00664.18|ABC_membrane;PF00664.18|ABC_membrane;PF02887.11|PK_C	GO:0016887|ATPase activity;GO:0016021|integral component of membrane;GO:0006096|glycolytic process;GO:0005524|ATP binding;GO:0004743|pyruvate kinase activity;GO:0000287|magnesium ion binding;GO:0042626|ATPase activity, coupled to transmembrane movement of substances;GO:0030955|potassium ion binding;GO:0055085|transmembrane transport;GO:0006810|transport	NA	NA	NA	12	NA	NA	NA	Down	0.0795296	No	Up	0.463	No	Up	0.00584804	Yes
Ophcf2|00065	scaffold_01:170597-172284	Alive	Dead	OK	128.903	121.116	-0.0898973	-0.180648	0.6866	0.787513	no	Pyruvate kinase	PF00224|PK; PF02887|PK_C;	NA	NA	NA	GO:0018130|heterocycle biosynthetic process; GO:0006733|oxidoreduction coenzyme metabolic process; GO:0006165|nucleoside diphosphate phosphorylation; GO:0009150|purine ribonucleotide metabolic process; GO:0019362|pyridine nucleotide metabolic process; GO:0009179|purine ribonucleoside diphosphate metabolic process; GO:0006807|nitrogen compound metabolic process; GO:0006754|ATP biosynthetic process…	NA	NA	NA	Ophio5|3193	0.919	1039.25	0	0.9852	85.4268	53.4829	107.072	PF00224.16|PK;PF00005.22|ABC_tran;PF00005.22|ABC_tran;PF00664.18|ABC_membrane;PF00664.18|ABC_membrane;PF02887.11|PK_C	GO:0016887|ATPase activity;GO:0016021|integral component of membrane;GO:0006096|glycolytic process;GO:0005524|ATP binding;GO:0004743|pyruvate kinase activity;GO:0000287|magnesium ion binding;GO:0042626|ATPase activity, coupled to transmembrane movement of substances;GO:0030955|potassium ion binding;GO:0055085|transmembrane transport;GO:0006810|transport	NA	NA	NA	12	NA	NA	NA	Down	0.0795296	No	Up	0.463	No	Up	0.00584804	Yes
Ophcf2|00066	scaffold_01:172375-173246	Dead	Fungus	OK	14.531	27.6189	0.926522	1.24703	0.01705	0.0425166	yes	related to multidrug resistance-associated protein	PF00005|ABC_tran;	NA	NA	NA	GO:0035639|purine ribonucleoside triphosphate binding; GO:0097159|organic cyclic compound binding; GO:0003674|molecular_function; GO:0032553|ribonucleotide binding; GO:0016887|ATPase activity; GO:0008144|drug binding; GO:0005488|binding; GO:0016787|hydrolase activity; GO:0016462|pyrophosphatase activity; GO:0043167|ion binding; GO:0000166|nucleotide binding; GO:0043168|anion binding; GO:1901363|h…	NA	NA	NA	Ophio5|3193	0.7	165.622	1.38e-48	0.7852	85.4268	53.4829	107.072	PF00224.16|PK;PF00005.22|ABC_tran;PF00005.22|ABC_tran;PF00664.18|ABC_membrane;PF00664.18|ABC_membrane;PF02887.11|PK_C	GO:0016887|ATPase activity;GO:0016021|integral component of membrane;GO:0006096|glycolytic process;GO:0005524|ATP binding;GO:0004743|pyruvate kinase activity;GO:0000287|magnesium ion binding;GO:0042626|ATPase activity, coupled to transmembrane movement of substances;GO:0030955|potassium ion binding;GO:0055085|transmembrane transport;GO:0006810|transport	NA	NA	NA	12	NA	NA	NA	Down	0.0795296	No	Up	0.463	No	Up	0.00584804	Yes
Ophcf2|00066	scaffold_01:172375-173246	Alive	Fungus	OK	23.2212	27.6189	0.250215	0.349284	0.48245	0.615075	no	related to multidrug resistance-associated protein	PF00005|ABC_tran;	NA	NA	NA	GO:0035639|purine ribonucleoside triphosphate binding; GO:0097159|organic cyclic compound binding; GO:0003674|molecular_function; GO:0032553|ribonucleotide binding; GO:0016887|ATPase activity; GO:0008144|drug binding; GO:0005488|binding; GO:0016787|hydrolase activity; GO:0016462|pyrophosphatase activity; GO:0043167|ion binding; GO:0000166|nucleotide binding; GO:0043168|anion binding; GO:1901363|h…	NA	NA	NA	Ophio5|3193	0.7	165.622	1.38e-48	0.7852	85.4268	53.4829	107.072	PF00224.16|PK;PF00005.22|ABC_tran;PF00005.22|ABC_tran;PF00664.18|ABC_membrane;PF00664.18|ABC_membrane;PF02887.11|PK_C	GO:0016887|ATPase activity;GO:0016021|integral component of membrane;GO:0006096|glycolytic process;GO:0005524|ATP binding;GO:0004743|pyruvate kinase activity;GO:0000287|magnesium ion binding;GO:0042626|ATPase activity, coupled to transmembrane movement of substances;GO:0030955|potassium ion binding;GO:0055085|transmembrane transport;GO:0006810|transport	NA	NA	NA	12	NA	NA	NA	Down	0.0795296	No	Up	0.463	No	Up	0.00584804	Yes
Ophcf2|00066	scaffold_01:172375-173246	Alive	Dead	OK	23.2212	14.531	-0.676307	-0.878835	0.04495	0.0956682	no	related to multidrug resistance-associated protein	PF00005|ABC_tran;	NA	NA	NA	GO:0035639|purine ribonucleoside triphosphate binding; GO:0097159|organic cyclic compound binding; GO:0003674|molecular_function; GO:0032553|ribonucleotide binding; GO:0016887|ATPase activity; GO:0008144|drug binding; GO:0005488|binding; GO:0016787|hydrolase activity; GO:0016462|pyrophosphatase activity; GO:0043167|ion binding; GO:0000166|nucleotide binding; GO:0043168|anion binding; GO:1901363|h…	NA	NA	NA	Ophio5|3193	0.7	165.622	1.38e-48	0.7852	85.4268	53.4829	107.072	PF00224.16|PK;PF00005.22|ABC_tran;PF00005.22|ABC_tran;PF00664.18|ABC_membrane;PF00664.18|ABC_membrane;PF02887.11|PK_C	GO:0016887|ATPase activity;GO:0016021|integral component of membrane;GO:0006096|glycolytic process;GO:0005524|ATP binding;GO:0004743|pyruvate kinase activity;GO:0000287|magnesium ion binding;GO:0042626|ATPase activity, coupled to transmembrane movement of substances;GO:0030955|potassium ion binding;GO:0055085|transmembrane transport;GO:0006810|transport	NA	NA	NA	12	NA	NA	NA	Down	0.0795296	No	Up	0.463	No	Up	0.00584804	Yes
Ophcf2|00067	scaffold_01:173549-174113	Alive	Dead	OK	17.7387	8.258	-1.10304	-1.1325	0.01475	0.0376162	yes	ABC transporter, transmembrane domain, type 1	NA	NA	NA	NA	NA	NA	NA	NA	Ophio5|3193	0.672	81.2629	1.09e-19	0.531	85.4268	53.4829	107.072	PF00224.16|PK;PF00005.22|ABC_tran;PF00005.22|ABC_tran;PF00664.18|ABC_membrane;PF00664.18|ABC_membrane;PF02887.11|PK_C	GO:0016887|ATPase activity;GO:0016021|integral component of membrane;GO:0006096|glycolytic process;GO:0005524|ATP binding;GO:0004743|pyruvate kinase activity;GO:0000287|magnesium ion binding;GO:0042626|ATPase activity, coupled to transmembrane movement of substances;GO:0030955|potassium ion binding;GO:0055085|transmembrane transport;GO:0006810|transport	NA	NA	NA	12	NA	NA	NA	Down	0.0795296	No	Up	0.463	No	Up	0.00584804	Yes
Ophcf2|00067	scaffold_01:173549-174113	Dead	Fungus	OK	8.258	26.3505	1.67397	1.8296	0.0018	0.00602701	yes	ABC transporter, transmembrane domain, type 1	NA	NA	NA	NA	NA	NA	NA	NA	Ophio5|3193	0.672	81.2629	1.09e-19	0.531	85.4268	53.4829	107.072	PF00224.16|PK;PF00005.22|ABC_tran;PF00005.22|ABC_tran;PF00664.18|ABC_membrane;PF00664.18|ABC_membrane;PF02887.11|PK_C	GO:0016887|ATPase activity;GO:0016021|integral component of membrane;GO:0006096|glycolytic process;GO:0005524|ATP binding;GO:0004743|pyruvate kinase activity;GO:0000287|magnesium ion binding;GO:0042626|ATPase activity, coupled to transmembrane movement of substances;GO:0030955|potassium ion binding;GO:0055085|transmembrane transport;GO:0006810|transport	NA	NA	NA	12	NA	NA	NA	Down	0.0795296	No	Up	0.463	No	Up	0.00584804	Yes
Ophcf2|00067	scaffold_01:173549-174113	Alive	Fungus	OK	17.7387	26.3505	0.570929	0.657385	0.21025	0.32925	no	ABC transporter, transmembrane domain, type 1	NA	NA	NA	NA	NA	NA	NA	NA	Ophio5|3193	0.672	81.2629	1.09e-19	0.531	85.4268	53.4829	107.072	PF00224.16|PK;PF00005.22|ABC_tran;PF00005.22|ABC_tran;PF00664.18|ABC_membrane;PF00664.18|ABC_membrane;PF02887.11|PK_C	GO:0016887|ATPase activity;GO:0016021|integral component of membrane;GO:0006096|glycolytic process;GO:0005524|ATP binding;GO:0004743|pyruvate kinase activity;GO:0000287|magnesium ion binding;GO:0042626|ATPase activity, coupled to transmembrane movement of substances;GO:0030955|potassium ion binding;GO:0055085|transmembrane transport;GO:0006810|transport	NA	NA	NA	12	NA	NA	NA	Down	0.0795296	No	Up	0.463	No	Up	0.00584804	Yes
Ophcf2|00068	scaffold_01:174345-176160	Dead	Fungus	OK	6.99795	5.97545	-0.227886	-0.308528	0.5482	0.673809	no	ABC transporter atnG	NA	NA	NA	NA	NA	NA	NA	3;	Ophio5|3193	0.509	262.692	1.72e-79	0.8563	85.4268	53.4829	107.072	PF00224.16|PK;PF00005.22|ABC_tran;PF00005.22|ABC_tran;PF00664.18|ABC_membrane;PF00664.18|ABC_membrane;PF02887.11|PK_C	GO:0016887|ATPase activity;GO:0016021|integral component of membrane;GO:0006096|glycolytic process;GO:0005524|ATP binding;GO:0004743|pyruvate kinase activity;GO:0000287|magnesium ion binding;GO:0042626|ATPase activity, coupled to transmembrane movement of substances;GO:0030955|potassium ion binding;GO:0055085|transmembrane transport;GO:0006810|transport	NA	NA	NA	12	NA	NA	NA	Down	0.0795296	No	Up	0.463	No	Up	0.00584804	Yes
Ophcf2|00068	scaffold_01:174345-176160	Alive	Dead	OK	10.8615	6.99795	-0.634224	-0.891134	0.047	0.0990223	no	ABC transporter atnG	NA	NA	NA	NA	NA	NA	NA	3;	Ophio5|3193	0.509	262.692	1.72e-79	0.8563	85.4268	53.4829	107.072	PF00224.16|PK;PF00005.22|ABC_tran;PF00005.22|ABC_tran;PF00664.18|ABC_membrane;PF00664.18|ABC_membrane;PF02887.11|PK_C	GO:0016887|ATPase activity;GO:0016021|integral component of membrane;GO:0006096|glycolytic process;GO:0005524|ATP binding;GO:0004743|pyruvate kinase activity;GO:0000287|magnesium ion binding;GO:0042626|ATPase activity, coupled to transmembrane movement of substances;GO:0030955|potassium ion binding;GO:0055085|transmembrane transport;GO:0006810|transport	NA	NA	NA	12	NA	NA	NA	Down	0.0795296	No	Up	0.463	No	Up	0.00584804	Yes
Ophcf2|00068	scaffold_01:174345-176160	Alive	Fungus	OK	10.8615	5.97545	-0.862109	-1.20762	0.0207	0.0501009	no	ABC transporter atnG	NA	NA	NA	NA	NA	NA	NA	3;	Ophio5|3193	0.509	262.692	1.72e-79	0.8563	85.4268	53.4829	107.072	PF00224.16|PK;PF00005.22|ABC_tran;PF00005.22|ABC_tran;PF00664.18|ABC_membrane;PF00664.18|ABC_membrane;PF02887.11|PK_C	GO:0016887|ATPase activity;GO:0016021|integral component of membrane;GO:0006096|glycolytic process;GO:0005524|ATP binding;GO:0004743|pyruvate kinase activity;GO:0000287|magnesium ion binding;GO:0042626|ATPase activity, coupled to transmembrane movement of substances;GO:0030955|potassium ion binding;GO:0055085|transmembrane transport;GO:0006810|transport	NA	NA	NA	12	NA	NA	NA	Down	0.0795296	No	Up	0.463	No	Up	0.00584804	Yes
Ophcf2|00069	scaffold_01:176737-177262	Alive	Dead	OK	621.71	588.94	-0.0781209	-0.151644	0.73125	0.820275	no	predicted protein	PF08520|DUF1748;	NA	NA	NA	NA	NA	NA	NA	Ophio5|3192	0.945	143.28	4.22e-47	0.9605	211.65	221.221	222.894	PF08520.5|DUF1748	NA	NA	NA	NA	NA	NA	NA	NA	Up	0.901133	No	Up	0.885036	No	Up	0.983313	No
Ophcf2|00069	scaffold_01:176737-177262	Alive	Fungus	OK	621.71	656.48	0.0785077	0.153111	0.7665	0.846218	no	predicted protein	PF08520|DUF1748;	NA	NA	NA	NA	NA	NA	NA	Ophio5|3192	0.945	143.28	4.22e-47	0.9605	211.65	221.221	222.894	PF08520.5|DUF1748	NA	NA	NA	NA	NA	NA	NA	NA	Up	0.901133	No	Up	0.885036	No	Up	0.983313	No
Ophcf2|00069	scaffold_01:176737-177262	Dead	Fungus	OK	588.94	656.48	0.156629	0.304057	0.54815	0.673809	no	predicted protein	PF08520|DUF1748;	NA	NA	NA	NA	NA	NA	NA	Ophio5|3192	0.945	143.28	4.22e-47	0.9605	211.65	221.221	222.894	PF08520.5|DUF1748	NA	NA	NA	NA	NA	NA	NA	NA	Up	0.901133	No	Up	0.885036	No	Up	0.983313	No
Ophcf2|00070	scaffold_01:177766-179701	Alive	Dead	OK	27.9111	23.7885	-0.230574	-0.491267	0.2698	0.398084	no	autophagy Atg28p	NA	NA	NA	NA	NA	NA	NA	NA	Ophio5|3191	0.697	820.846	0	0.9938	27.0911	23.2715	23.3542	NA	NA	NA	NA	NA	NA	NA	NA	NA	Down	0.564611	No	Down	0.579008	No	Up	0.990926	No
Ophcf2|00070	scaffold_01:177766-179701	Alive	Fungus	OK	27.9111	24.074	-0.213364	-0.455873	0.3741	0.510879	no	autophagy Atg28p	NA	NA	NA	NA	NA	NA	NA	NA	Ophio5|3191	0.697	820.846	0	0.9938	27.0911	23.2715	23.3542	NA	NA	NA	NA	NA	NA	NA	NA	NA	Down	0.564611	No	Down	0.579008	No	Up	0.990926	No
Ophcf2|00070	scaffold_01:177766-179701	Dead	Fungus	OK	23.7885	24.074	0.0172097	0.0365473	0.9443	0.965197	no	autophagy Atg28p	NA	NA	NA	NA	NA	NA	NA	NA	Ophio5|3191	0.697	820.846	0	0.9938	27.0911	23.2715	23.3542	NA	NA	NA	NA	NA	NA	NA	NA	NA	Down	0.564611	No	Down	0.579008	No	Up	0.990926	No
Ophcf2|00071	scaffold_01:181018-182999	Alive	Fungus	OK	72.3729	40.5703	-0.835024	-1.86843	0.0004	0.00158983	yes	WD domain containing protein	PF00400|WD40;	NA	NA	NA	GO:0003674|molecular_function; GO:0005488|binding; GO:0005515|protein binding;	NA	NA	NA	Ophio5|3190	0.897	1100.12	0	0.9984	31.2772	47.7946	41.4134	PF00400.27|WD40;PF00400.27|WD40;PF00400.27|WD40	GO:0005515|protein binding	NA	NA	NA	NA	NA	NA	NA	Up	0.066632	No	Up	0.236265	No	Down	0.565584	No
Ophcf2|00071	scaffold_01:181018-182999	Dead	Fungus	OK	75.5144	40.5703	-0.896326	-2.02635	5e-05	0.000237974	yes	WD domain containing protein	PF00400|WD40;	NA	NA	NA	GO:0003674|molecular_function; GO:0005488|binding; GO:0005515|protein binding;	NA	NA	NA	Ophio5|3190	0.897	1100.12	0	0.9984	31.2772	47.7946	41.4134	PF00400.27|WD40;PF00400.27|WD40;PF00400.27|WD40	GO:0005515|protein binding	NA	NA	NA	NA	NA	NA	NA	Up	0.066632	No	Up	0.236265	No	Down	0.565584	No
Ophcf2|00071	scaffold_01:181018-182999	Alive	Dead	OK	72.3729	75.5144	0.0613022	0.137187	0.75725	0.839529	no	WD domain containing protein	PF00400|WD40;	NA	NA	NA	GO:0003674|molecular_function; GO:0005488|binding; GO:0005515|protein binding;	NA	NA	NA	Ophio5|3190	0.897	1100.12	0	0.9984	31.2772	47.7946	41.4134	PF00400.27|WD40;PF00400.27|WD40;PF00400.27|WD40	GO:0005515|protein binding	NA	NA	NA	NA	NA	NA	NA	Up	0.066632	No	Up	0.236265	No	Down	0.565584	No
Ophcf2|00072	scaffold_01:184050-187384	Alive	Dead	OK	38.7483	43.1771	0.156136	0.353917	0.4207	0.558362	no	transcription initiation protein spt5	PF11942|Spt5_N; PF03439|Spt5-NGN; PF12815|CTD;	NA	NA	NA	NA	NA	NA	NA	Ophio5|3189	0.938	1840.85	0	0.9991	55.6398	41.5918	37.9685	PF12815.2|CTD;PF12815.2|CTD;PF12815.2|CTD;PF03439.8|Spt5-NGN;PF11942.3|Spt5_N	NA	NA	NA	NA	NA	NA	NA	NA	Down	0.231292	No	Down	0.0945922	No	Down	0.745013	No
Ophcf2|00072	scaffold_01:184050-187384	Dead	Fungus	OK	43.1771	47.3029	0.131661	0.295401	0.55805	0.681991	no	transcription initiation protein spt5	PF11942|Spt5_N; PF03439|Spt5-NGN; PF12815|CTD;	NA	NA	NA	NA	NA	NA	NA	Ophio5|3189	0.938	1840.85	0	0.9991	55.6398	41.5918	37.9685	PF12815.2|CTD;PF12815.2|CTD;PF12815.2|CTD;PF03439.8|Spt5-NGN;PF11942.3|Spt5_N	NA	NA	NA	NA	NA	NA	NA	NA	Down	0.231292	No	Down	0.0945922	No	Down	0.745013	No
Ophcf2|00072	scaffold_01:184050-187384	Alive	Fungus	OK	38.7483	47.3029	0.287797	0.646643	0.2119	0.331185	no	transcription initiation protein spt5	PF11942|Spt5_N; PF03439|Spt5-NGN; PF12815|CTD;	NA	NA	NA	NA	NA	NA	NA	Ophio5|3189	0.938	1840.85	0	0.9991	55.6398	41.5918	37.9685	PF12815.2|CTD;PF12815.2|CTD;PF12815.2|CTD;PF03439.8|Spt5-NGN;PF11942.3|Spt5_N	NA	NA	NA	NA	NA	NA	NA	NA	Down	0.231292	No	Down	0.0945922	No	Down	0.745013	No
Ophcf2|00073	scaffold_01:188038-188369	Alive	Fungus	OK	74.5257	52.5974	-0.502747	-0.652324	0.20205	0.319096	no	Transcription elongation factor SPT5	NA	NA	NA	NA	NA	NA	NA	1;	Ophio5|3188	0.768	107.071	1.16e-31	0.9425	21.6133	14.2869	19.277	NA	NA	NA	NA	NA	1	NA	NA	NA	Down	0.251049	No	Down	0.784145	No	Up	0.447287	No
Ophcf2|00073	scaffold_01:188038-188369	Alive	Dead	OK	74.5257	52.752	-0.498512	-0.650904	0.1457	0.246509	no	Transcription elongation factor SPT5	NA	NA	NA	NA	NA	NA	NA	1;	Ophio5|3188	0.768	107.071	1.16e-31	0.9425	21.6133	14.2869	19.277	NA	NA	NA	NA	NA	1	NA	NA	NA	Down	0.251049	No	Down	0.784145	No	Up	0.447287	No
Ophcf2|00073	scaffold_01:188038-188369	Dead	Fungus	OK	52.752	52.5974	-0.00423506	-0.00532044	0.9907	0.994296	no	Transcription elongation factor SPT5	NA	NA	NA	NA	NA	NA	NA	1;	Ophio5|3188	0.768	107.071	1.16e-31	0.9425	21.6133	14.2869	19.277	NA	NA	NA	NA	NA	1	NA	NA	NA	Down	0.251049	No	Down	0.784145	No	Up	0.447287	No
Ophcf2|00074	scaffold_01:188525-190412	Alive	Fungus	OK	199.06	31.1019	-2.67813	-5.42794	5e-05	0.000237974	yes	4-coumarate-CoA ligase 2	PF00501|AMP-binding; PF13193|AMP-binding_C;	NA	NA	NA	GO:0003824|catalytic activity; GO:0003674|molecular_function;	NA	NA	NA	Ophio5|3187	0.707	808.135	0	0.9982	52.0314	321.122	209.694	PF00501.23|AMP-binding;PF13193.1|AMP-binding_C	GO:0003824|catalytic activity;GO:0008152|metabolic process	NA	NA	NA	2	NA	NA	NA	Up	0.000285532	Yes	Up	0.000285532	Yes	Down	0.135458	No
Ophcf2|00074	scaffold_01:188525-190412	Alive	Dead	OK	199.06	113.555	-0.809811	-1.65764	0.0003	0.0012265	yes	4-coumarate-CoA ligase 2	PF00501|AMP-binding; PF13193|AMP-binding_C;	NA	NA	NA	GO:0003824|catalytic activity; GO:0003674|molecular_function;	NA	NA	NA	Ophio5|3187	0.707	808.135	0	0.9982	52.0314	321.122	209.694	PF00501.23|AMP-binding;PF13193.1|AMP-binding_C	GO:0003824|catalytic activity;GO:0008152|metabolic process	NA	NA	NA	2	NA	NA	NA	Up	0.000285532	Yes	Up	0.000285532	Yes	Down	0.135458	No
Ophcf2|00074	scaffold_01:188525-190412	Dead	Fungus	OK	113.555	31.1019	-1.86832	-4.02751	5e-05	0.000237974	yes	4-coumarate-CoA ligase 2	PF00501|AMP-binding; PF13193|AMP-binding_C;	NA	NA	NA	GO:0003824|catalytic activity; GO:0003674|molecular_function;	NA	NA	NA	Ophio5|3187	0.707	808.135	0	0.9982	52.0314	321.122	209.694	PF00501.23|AMP-binding;PF13193.1|AMP-binding_C	GO:0003824|catalytic activity;GO:0008152|metabolic process	NA	NA	NA	2	NA	NA	NA	Up	0.000285532	Yes	Up	0.000285532	Yes	Down	0.135458	No
Ophcf2|00075	scaffold_01:191113-197785	Alive	Fungus	OK	163.727	60.1168	-1.44545	-2.63333	5e-05	0.000237974	yes	Myosin head, motor domain protein	PF01843|DIL; PF00612|IQ; PF00063|Myosin_head;	NA	NA	NA	GO:0035639|purine ribonucleoside triphosphate binding; GO:0005575|cellular_component; GO:0097159|organic cyclic compound binding; GO:0003674|molecular_function; GO:0032553|ribonucleotide binding; GO:0016459|myosin complex; GO:0044424|intracellular part; GO:0008144|drug binding; GO:0032991|protein-containing complex; GO:0016787|hydrolase activity; GO:0005488|binding; GO:0016462|pyrophosphatase act…	NA	NA	NA	Ophio5|8324	0.95	3104.69	0	0.9236	127.355	154.938	132.301	PF00063.16|Myosin_head;PF01843.14|DIL;PF00612.22|IQ;PF00612.22|IQ;PF00612.22|IQ	GO:0016459|myosin complex;GO:0005515|protein binding;GO:0003774|motor activity;GO:0005524|ATP binding	NA	NA	NA	NA	NA	NA	NA	Up	0.564815	No	Up	0.919289	No	Down	0.643046	No
Ophcf2|00075	scaffold_01:191113-197785	Alive	Dead	OK	163.727	114.887	-0.511079	-0.888249	0.04705	0.0991082	no	Myosin head, motor domain protein	PF01843|DIL; PF00612|IQ; PF00063|Myosin_head;	NA	NA	NA	GO:0035639|purine ribonucleoside triphosphate binding; GO:0005575|cellular_component; GO:0097159|organic cyclic compound binding; GO:0003674|molecular_function; GO:0032553|ribonucleotide binding; GO:0016459|myosin complex; GO:0044424|intracellular part; GO:0008144|drug binding; GO:0032991|protein-containing complex; GO:0016787|hydrolase activity; GO:0005488|binding; GO:0016462|pyrophosphatase act…	NA	NA	NA	Ophio5|8324	0.95	3104.69	0	0.9236	127.355	154.938	132.301	PF00063.16|Myosin_head;PF01843.14|DIL;PF00612.22|IQ;PF00612.22|IQ;PF00612.22|IQ	GO:0016459|myosin complex;GO:0005515|protein binding;GO:0003774|motor activity;GO:0005524|ATP binding	NA	NA	NA	NA	NA	NA	NA	Up	0.564815	No	Up	0.919289	No	Down	0.643046	No
Ophcf2|00075	scaffold_01:191113-197785	Dead	Fungus	OK	114.887	60.1168	-0.934371	-1.78437	0.00055	0.00211659	yes	Myosin head, motor domain protein	PF01843|DIL; PF00612|IQ; PF00063|Myosin_head;	NA	NA	NA	GO:0035639|purine ribonucleoside triphosphate binding; GO:0005575|cellular_component; GO:0097159|organic cyclic compound binding; GO:0003674|molecular_function; GO:0032553|ribonucleotide binding; GO:0016459|myosin complex; GO:0044424|intracellular part; GO:0008144|drug binding; GO:0032991|protein-containing complex; GO:0016787|hydrolase activity; GO:0005488|binding; GO:0016462|pyrophosphatase act…	NA	NA	NA	Ophio5|8324	0.95	3104.69	0	0.9236	127.355	154.938	132.301	PF00063.16|Myosin_head;PF01843.14|DIL;PF00612.22|IQ;PF00612.22|IQ;PF00612.22|IQ	GO:0016459|myosin complex;GO:0005515|protein binding;GO:0003774|motor activity;GO:0005524|ATP binding	NA	NA	NA	NA	NA	NA	NA	Up	0.564815	No	Up	0.919289	No	Down	0.643046	No
Ophcf2|00076	scaffold_01:199327-200955	Alive	Fungus	OK	47.3803	49.2283	0.0552003	0.123981	0.8072	0.874984	no	Wings apart-like protein	PF07814|WAPL;	NA	NA	NA	NA	NA	NA	NA	Ophio5|681	0.677	634.41	0	0.9692	114.16	106.206	81.9757	PF07814.8|WAPL	NA	NA	NA	NA	NA	NA	NA	NA	Down	0.805144	No	Down	0.177965	No	Down	0.289217	No
Ophcf2|00076	scaffold_01:199327-200955	Alive	Dead	OK	47.3803	54.8489	0.211175	0.473576	0.2897	0.420485	no	Wings apart-like protein	PF07814|WAPL;	NA	NA	NA	NA	NA	NA	NA	Ophio5|681	0.677	634.41	0	0.9692	114.16	106.206	81.9757	PF07814.8|WAPL	NA	NA	NA	NA	NA	NA	NA	NA	Down	0.805144	No	Down	0.177965	No	Down	0.289217	No
Ophcf2|00076	scaffold_01:199327-200955	Dead	Fungus	OK	54.8489	49.2283	-0.155974	-0.351359	0.49935	0.630361	no	Wings apart-like protein	PF07814|WAPL;	NA	NA	NA	NA	NA	NA	NA	Ophio5|681	0.677	634.41	0	0.9692	114.16	106.206	81.9757	PF07814.8|WAPL	NA	NA	NA	NA	NA	NA	NA	NA	Down	0.805144	No	Down	0.177965	No	Down	0.289217	No
Ophcf2|00077	scaffold_01:201391-202347	Dead	Fungus	OK	50.1884	96.5757	0.944305	1.8235	0.0006	0.00228657	yes	Inosine triphosphate pyrophosphatase	PF01725|Ham1p_like;	NA	NA	NA	GO:0018130|heterocycle biosynthetic process; GO:0003674|molecular_function; GO:0009056|catabolic process; GO:1901292|nucleoside phosphate catabolic process; GO:0034655|nucleobase-containing compound catabolic process; GO:0009143|nucleoside triphosphate catabolic process; GO:0034654|nucleobase-containing compound biosynthetic process; GO:0071704|organic substance metabolic process; GO:0009987|cell…	NA	NA	NA	Ophio5|8344	0.895	291.582	8.92e-103	0.7688	97.0871	84.1914	83.1555	PF01725.11|Ham1p_like	GO:0016787|hydrolase activity	NA	NA	NA	NA	NA	NA	NA	Down	0.657111	No	Down	0.610605	No	Down	0.973082	No
Ophcf2|00077	scaffold_01:201391-202347	Alive	Dead	OK	70.5435	50.1884	-0.491157	-0.87432	0.0454	0.0963193	no	Inosine triphosphate pyrophosphatase	PF01725|Ham1p_like;	NA	NA	NA	GO:0018130|heterocycle biosynthetic process; GO:0003674|molecular_function; GO:0009056|catabolic process; GO:1901292|nucleoside phosphate catabolic process; GO:0034655|nucleobase-containing compound catabolic process; GO:0009143|nucleoside triphosphate catabolic process; GO:0034654|nucleobase-containing compound biosynthetic process; GO:0071704|organic substance metabolic process; GO:0009987|cell…	NA	NA	NA	Ophio5|8344	0.895	291.582	8.92e-103	0.7688	97.0871	84.1914	83.1555	PF01725.11|Ham1p_like	GO:0016787|hydrolase activity	NA	NA	NA	NA	NA	NA	NA	Down	0.657111	No	Down	0.610605	No	Down	0.973082	No
Ophcf2|00077	scaffold_01:201391-202347	Alive	Fungus	OK	70.5435	96.5757	0.453148	0.857803	0.0912	0.169966	no	Inosine triphosphate pyrophosphatase	PF01725|Ham1p_like;	NA	NA	NA	GO:0018130|heterocycle biosynthetic process; GO:0003674|molecular_function; GO:0009056|catabolic process; GO:1901292|nucleoside phosphate catabolic process; GO:0034655|nucleobase-containing compound catabolic process; GO:0009143|nucleoside triphosphate catabolic process; GO:0034654|nucleobase-containing compound biosynthetic process; GO:0071704|organic substance metabolic process; GO:0009987|cell…	NA	NA	NA	Ophio5|8344	0.895	291.582	8.92e-103	0.7688	97.0871	84.1914	83.1555	PF01725.11|Ham1p_like	GO:0016787|hydrolase activity	NA	NA	NA	NA	NA	NA	NA	Down	0.657111	No	Down	0.610605	No	Down	0.973082	No
Ophcf2|00078	scaffold_01:202636-204427	Alive	Dead	OK	316.946	222.26	-0.511992	-1.00068	0.0246	0.0579598	no	seryl-tRNA synthetase	PF02403|Seryl_tRNA_N; PF00587|tRNA-synt_2b;	NA	NA	NA	GO:0035639|purine ribonucleoside triphosphate binding; GO:0016874|ligase activity; GO:0097159|organic cyclic compound binding; GO:0043436|oxoacid metabolic process; GO:0003674|molecular_function; GO:0019752|carboxylic acid metabolic process; GO:0032553|ribonucleotide binding; GO:0071704|organic substance metabolic process; GO:0009987|cellular process; GO:0008144|drug binding; GO:0005488|binding; …	NA	NA	NA	Ophio5|944	0.906	863.988	0	0.976	233.4	201.524	187.286	PF00587.20|tRNA-synt_2b;PF02403.17|Seryl_tRNA_N	GO:0006434|seryl-tRNA aminoacylation;GO:0005737|cytoplasm;GO:0004812|aminoacyl-tRNA ligase activity;GO:0005524|ATP binding;GO:0000166|nucleotide binding;GO:0006418|tRNA aminoacylation for protein translation;GO:0004828|serine-tRNA ligase activity	NA	NA	NA	NA	NA	NA	NA	Down	0.6001	No	Down	0.415199	No	Down	0.805144	No
Ophcf2|00078	scaffold_01:202636-204427	Alive	Fungus	OK	316.946	369.247	0.220347	0.422707	0.40445	0.542031	no	seryl-tRNA synthetase	PF02403|Seryl_tRNA_N; PF00587|tRNA-synt_2b;	NA	NA	NA	GO:0035639|purine ribonucleoside triphosphate binding; GO:0016874|ligase activity; GO:0097159|organic cyclic compound binding; GO:0043436|oxoacid metabolic process; GO:0003674|molecular_function; GO:0019752|carboxylic acid metabolic process; GO:0032553|ribonucleotide binding; GO:0071704|organic substance metabolic process; GO:0009987|cellular process; GO:0008144|drug binding; GO:0005488|binding; …	NA	NA	NA	Ophio5|944	0.906	863.988	0	0.976	233.4	201.524	187.286	PF00587.20|tRNA-synt_2b;PF02403.17|Seryl_tRNA_N	GO:0006434|seryl-tRNA aminoacylation;GO:0005737|cytoplasm;GO:0004812|aminoacyl-tRNA ligase activity;GO:0005524|ATP binding;GO:0000166|nucleotide binding;GO:0006418|tRNA aminoacylation for protein translation;GO:0004828|serine-tRNA ligase activity	NA	NA	NA	NA	NA	NA	NA	Down	0.6001	No	Down	0.415199	No	Down	0.805144	No
Ophcf2|00078	scaffold_01:202636-204427	Dead	Fungus	OK	222.26	369.247	0.732339	1.42776	0.0054	0.0158108	yes	seryl-tRNA synthetase	PF02403|Seryl_tRNA_N; PF00587|tRNA-synt_2b;	NA	NA	NA	GO:0035639|purine ribonucleoside triphosphate binding; GO:0016874|ligase activity; GO:0097159|organic cyclic compound binding; GO:0043436|oxoacid metabolic process; GO:0003674|molecular_function; GO:0019752|carboxylic acid metabolic process; GO:0032553|ribonucleotide binding; GO:0071704|organic substance metabolic process; GO:0009987|cellular process; GO:0008144|drug binding; GO:0005488|binding; …	NA	NA	NA	Ophio5|944	0.906	863.988	0	0.976	233.4	201.524	187.286	PF00587.20|tRNA-synt_2b;PF02403.17|Seryl_tRNA_N	GO:0006434|seryl-tRNA aminoacylation;GO:0005737|cytoplasm;GO:0004812|aminoacyl-tRNA ligase activity;GO:0005524|ATP binding;GO:0000166|nucleotide binding;GO:0006418|tRNA aminoacylation for protein translation;GO:0004828|serine-tRNA ligase activity	NA	NA	NA	NA	NA	NA	NA	Down	0.6001	No	Down	0.415199	No	Down	0.805144	No
Ophcf2|00079	scaffold_01:233108-234249	Alive	Dead	OK	309.302	186.655	-0.72864	-1.54506	0.00055	0.00211659	yes	Methylenetetrahydrofolate dehydrogenase	PF00763|THF_DHG_CYH; PF02882|THF_DHG_CYH_C;	NA	NA	NA	GO:0003824|catalytic activity; GO:0055114|oxidation-reduction process; GO:0016491|oxidoreductase activity; GO:0003674|molecular_function; GO:0008150|biological_process; GO:0004488|methylenetetrahydrofolate dehydrogenase (NADP+) activity; GO:0016646|oxidoreductase activity, acting on the CH-NH group of donors, NAD or NADP as acceptor; GO:0008152|metabolic process; GO:0016645|oxidoreductase activit…	NA	NA	NA	Ophio5|4686	0.914	651.744	0	0.9971	383.974	49.1379	55.2088	PF00763.18|THF_DHG_CYH;PF02882.14|THF_DHG_CYH_C	GO:0009396|folic acid-containing compound biosynthetic process;GO:0055114|oxidation-reduction process;GO:0004488|methylenetetrahydrofolate dehydrogenase (NADP+) activity;GO:0003824|catalytic activity	NA	NA	NA	NA	NA	NA	NA	Down	0.000285532	Yes	Down	0.000285532	Yes	Up	0.675199	No
Ophcf2|00079	scaffold_01:233108-234249	Alive	Fungus	OK	309.302	272.711	-0.181641	-0.377539	0.45295	0.588527	no	Methylenetetrahydrofolate dehydrogenase	PF00763|THF_DHG_CYH; PF02882|THF_DHG_CYH_C;	NA	NA	NA	GO:0003824|catalytic activity; GO:0055114|oxidation-reduction process; GO:0016491|oxidoreductase activity; GO:0003674|molecular_function; GO:0008150|biological_process; GO:0004488|methylenetetrahydrofolate dehydrogenase (NADP+) activity; GO:0016646|oxidoreductase activity, acting on the CH-NH group of donors, NAD or NADP as acceptor; GO:0008152|metabolic process; GO:0016645|oxidoreductase activit…	NA	NA	NA	Ophio5|4686	0.914	651.744	0	0.9971	383.974	49.1379	55.2088	PF00763.18|THF_DHG_CYH;PF02882.14|THF_DHG_CYH_C	GO:0009396|folic acid-containing compound biosynthetic process;GO:0055114|oxidation-reduction process;GO:0004488|methylenetetrahydrofolate dehydrogenase (NADP+) activity;GO:0003824|catalytic activity	NA	NA	NA	NA	NA	NA	NA	Down	0.000285532	Yes	Down	0.000285532	Yes	Up	0.675199	No
Ophcf2|00079	scaffold_01:233108-234249	Dead	Fungus	OK	186.655	272.711	0.546999	1.1834	0.02155	0.0518209	no	Methylenetetrahydrofolate dehydrogenase	PF00763|THF_DHG_CYH; PF02882|THF_DHG_CYH_C;	NA	NA	NA	GO:0003824|catalytic activity; GO:0055114|oxidation-reduction process; GO:0016491|oxidoreductase activity; GO:0003674|molecular_function; GO:0008150|biological_process; GO:0004488|methylenetetrahydrofolate dehydrogenase (NADP+) activity; GO:0016646|oxidoreductase activity, acting on the CH-NH group of donors, NAD or NADP as acceptor; GO:0008152|metabolic process; GO:0016645|oxidoreductase activit…	NA	NA	NA	Ophio5|4686	0.914	651.744	0	0.9971	383.974	49.1379	55.2088	PF00763.18|THF_DHG_CYH;PF02882.14|THF_DHG_CYH_C	GO:0009396|folic acid-containing compound biosynthetic process;GO:0055114|oxidation-reduction process;GO:0004488|methylenetetrahydrofolate dehydrogenase (NADP+) activity;GO:0003824|catalytic activity	NA	NA	NA	NA	NA	NA	NA	Down	0.000285532	Yes	Down	0.000285532	Yes	Up	0.675199	No
Ophcf2|00080	scaffold_01:275466-277287	Alive	Dead	OK	210.235	135.074	-0.638253	-1.3389	0.00285	0.00902179	yes	D-3-phosphoglycerate dehydrogenase 2	PF02826|2-Hacid_dh_C; PF00389|2-Hacid_dh;	NA	NA	NA	GO:0003824|catalytic activity; GO:0005488|binding; GO:1901265|nucleoside phosphate binding; GO:0097159|organic cyclic compound binding; GO:0048037|cofactor binding; GO:0055114|oxidation-reduction process; GO:0016614|oxidoreductase activity, acting on CH-OH group of donors; GO:0003674|molecular_function; GO:0016616|oxidoreductase activity, acting on the CH-OH group of donors, NAD or NADP as accept…	NA	NA	NA	Ophio5|8463	0.845	807.364	0	0.9978	148.921	228	194.47	PF02826.14|2-Hacid_dh_C;PF02826.14|2-Hacid_dh_C;PF00389.25|2-Hacid_dh	GO:0051287|NAD binding;GO:0048037|cofactor binding;GO:0055114|oxidation-reduction process;GO:0016616|oxidoreductase activity, acting on the CH-OH group of donors, NAD or NADP as acceptor;GO:0008152|metabolic process	NA	NA	NA	NA	NA	NA	NA	Up	0.0754894	No	Up	0.281851	No	Down	0.56866	No
Ophcf2|00080	scaffold_01:275466-277287	Dead	Fungus	OK	135.074	166.19	0.299077	0.642022	0.2062	0.324344	no	D-3-phosphoglycerate dehydrogenase 2	PF02826|2-Hacid_dh_C; PF00389|2-Hacid_dh;	NA	NA	NA	GO:0003824|catalytic activity; GO:0005488|binding; GO:1901265|nucleoside phosphate binding; GO:0097159|organic cyclic compound binding; GO:0048037|cofactor binding; GO:0055114|oxidation-reduction process; GO:0016614|oxidoreductase activity, acting on CH-OH group of donors; GO:0003674|molecular_function; GO:0016616|oxidoreductase activity, acting on the CH-OH group of donors, NAD or NADP as accept…	NA	NA	NA	Ophio5|8463	0.845	807.364	0	0.9978	148.921	228	194.47	PF02826.14|2-Hacid_dh_C;PF02826.14|2-Hacid_dh_C;PF00389.25|2-Hacid_dh	GO:0051287|NAD binding;GO:0048037|cofactor binding;GO:0055114|oxidation-reduction process;GO:0016616|oxidoreductase activity, acting on the CH-OH group of donors, NAD or NADP as acceptor;GO:0008152|metabolic process	NA	NA	NA	NA	NA	NA	NA	Up	0.0754894	No	Up	0.281851	No	Down	0.56866	No
Ophcf2|00080	scaffold_01:275466-277287	Alive	Fungus	OK	210.235	166.19	-0.339175	-0.712678	0.1643	0.271338	no	D-3-phosphoglycerate dehydrogenase 2	PF02826|2-Hacid_dh_C; PF00389|2-Hacid_dh;	NA	NA	NA	GO:0003824|catalytic activity; GO:0005488|binding; GO:1901265|nucleoside phosphate binding; GO:0097159|organic cyclic compound binding; GO:0048037|cofactor binding; GO:0055114|oxidation-reduction process; GO:0016614|oxidoreductase activity, acting on CH-OH group of donors; GO:0003674|molecular_function; GO:0016616|oxidoreductase activity, acting on the CH-OH group of donors, NAD or NADP as accept…	NA	NA	NA	Ophio5|8463	0.845	807.364	0	0.9978	148.921	228	194.47	PF02826.14|2-Hacid_dh_C;PF02826.14|2-Hacid_dh_C;PF00389.25|2-Hacid_dh	GO:0051287|NAD binding;GO:0048037|cofactor binding;GO:0055114|oxidation-reduction process;GO:0016616|oxidoreductase activity, acting on the CH-OH group of donors, NAD or NADP as acceptor;GO:0008152|metabolic process	NA	NA	NA	NA	NA	NA	NA	Up	0.0754894	No	Up	0.281851	No	Down	0.56866	No
Ophcf2|00081	scaffold_01:277792-279463	Dead	Fungus	OK	156.009	188.053	0.269503	0.551136	0.2828	0.412775	no	ATP-dependent RNA helicase	PF00271|Helicase_C; PF00270|DEAD; PF04851|ResIII;	NA	NA	NA	GO:0035639|purine ribonucleoside triphosphate binding; GO:0097159|organic cyclic compound binding; GO:0003674|molecular_function; GO:0032553|ribonucleotide binding; GO:0008144|drug binding; GO:0005488|binding; GO:0016787|hydrolase activity; GO:0043167|ion binding; GO:0000166|nucleotide binding; GO:0043168|anion binding; GO:0003676|nucleic acid binding; GO:1901363|heterocyclic compound binding; GO…	NA	NA	NA	Ophio5|7807	0.794	865.914	0	0.9982	117.526	107.062	97.0786	PF00270.24|DEAD;PF00271.26|Helicase_C	GO:0003676|nucleic acid binding;GO:0004386|helicase activity;GO:0005524|ATP binding	NA	NA	NA	NA	NA	NA	NA	Down	0.743494	No	Down	0.463611	No	Down	0.721129	No
Ophcf2|00081	scaffold_01:277792-279463	Alive	Dead	OK	212.338	156.009	-0.444728	-0.896025	0.04165	0.0897762	no	ATP-dependent RNA helicase	PF00271|Helicase_C; PF00270|DEAD; PF04851|ResIII;	NA	NA	NA	GO:0035639|purine ribonucleoside triphosphate binding; GO:0097159|organic cyclic compound binding; GO:0003674|molecular_function; GO:0032553|ribonucleotide binding; GO:0008144|drug binding; GO:0005488|binding; GO:0016787|hydrolase activity; GO:0043167|ion binding; GO:0000166|nucleotide binding; GO:0043168|anion binding; GO:0003676|nucleic acid binding; GO:1901363|heterocyclic compound binding; GO…	NA	NA	NA	Ophio5|7807	0.794	865.914	0	0.9982	117.526	107.062	97.0786	PF00270.24|DEAD;PF00271.26|Helicase_C	GO:0003676|nucleic acid binding;GO:0004386|helicase activity;GO:0005524|ATP binding	NA	NA	NA	NA	NA	NA	NA	Down	0.743494	No	Down	0.463611	No	Down	0.721129	No
Ophcf2|00081	scaffold_01:277792-279463	Alive	Fungus	OK	212.338	188.053	-0.175225	-0.352524	0.48355	0.616113	no	ATP-dependent RNA helicase	PF00271|Helicase_C; PF00270|DEAD; PF04851|ResIII;	NA	NA	NA	GO:0035639|purine ribonucleoside triphosphate binding; GO:0097159|organic cyclic compound binding; GO:0003674|molecular_function; GO:0032553|ribonucleotide binding; GO:0008144|drug binding; GO:0005488|binding; GO:0016787|hydrolase activity; GO:0043167|ion binding; GO:0000166|nucleotide binding; GO:0043168|anion binding; GO:0003676|nucleic acid binding; GO:1901363|heterocyclic compound binding; GO…	NA	NA	NA	Ophio5|7807	0.794	865.914	0	0.9982	117.526	107.062	97.0786	PF00270.24|DEAD;PF00271.26|Helicase_C	GO:0003676|nucleic acid binding;GO:0004386|helicase activity;GO:0005524|ATP binding	NA	NA	NA	NA	NA	NA	NA	Down	0.743494	No	Down	0.463611	No	Down	0.721129	No
Ophcf2|00082	scaffold_01:349829-351712	Dead	Fungus	OK	104.952	130.758	0.317163	0.707194	0.1599	0.265658	no	Ubiquitin carboxyl-terminal hydrolase	PF00443|UCH; PF13423|UCH_1; PF02148|zf-UBP;	NA	NA	NA	GO:0006464|cellular protein modification process; GO:0003674|molecular_function; GO:0019783|ubiquitin-like protein-specific protease activity; GO:0071704|organic substance metabolic process; GO:0009987|cellular process; GO:0044267|cellular protein metabolic process; GO:0043412|macromolecule modification; GO:0016579|protein deubiquitination; GO:0140096|catalytic activity, acting on a protein; GO:0…	NA	MER094096 - family C19 unassigned peptidases (Phaeosphaeria nodorum) [C19.UPW]#C19#; MER142700 - family C19 unassigned peptidases (Pyrenophora tritici) [C19.UPW]#C19#; MER141822 - ubiquitin-specific peptidase 8 {{Saccharomyces cerevisiae}}-like peptidase (Debaryomyces hansenii) [C19.087]#C19#; MER118759 - family C19 unassigned peptidases (Laccaria bicolor) [C19.UPW]#C19#; MER002476 - ubiquitin-sp…	NA	Ophio5|266	0.938	999.194	0	0.9671	139.093	168.301	105.951	PF00443.24|UCH;PF13423.1|UCH_1;PF02148.14|zf-UBP	GO:0008270|zinc ion binding;GO:0006511|ubiquitin-dependent protein catabolic process	NA	NA	NA	NA	C19	NA	NA	Up	0.473872	No	Down	0.275996	No	Down	0.0500083	No
Ophcf2|00082	scaffold_01:349829-351712	Alive	Fungus	OK	133.954	130.758	-0.0348421	-0.0760394	0.87795	0.922448	no	Ubiquitin carboxyl-terminal hydrolase	PF00443|UCH; PF13423|UCH_1; PF02148|zf-UBP;	NA	NA	NA	GO:0006464|cellular protein modification process; GO:0003674|molecular_function; GO:0019783|ubiquitin-like protein-specific protease activity; GO:0071704|organic substance metabolic process; GO:0009987|cellular process; GO:0044267|cellular protein metabolic process; GO:0043412|macromolecule modification; GO:0016579|protein deubiquitination; GO:0140096|catalytic activity, acting on a protein; GO:0…	NA	MER094096 - family C19 unassigned peptidases (Phaeosphaeria nodorum) [C19.UPW]#C19#; MER142700 - family C19 unassigned peptidases (Pyrenophora tritici) [C19.UPW]#C19#; MER141822 - ubiquitin-specific peptidase 8 {{Saccharomyces cerevisiae}}-like peptidase (Debaryomyces hansenii) [C19.087]#C19#; MER118759 - family C19 unassigned peptidases (Laccaria bicolor) [C19.UPW]#C19#; MER002476 - ubiquitin-sp…	NA	Ophio5|266	0.938	999.194	0	0.9671	139.093	168.301	105.951	PF00443.24|UCH;PF13423.1|UCH_1;PF02148.14|zf-UBP	GO:0008270|zinc ion binding;GO:0006511|ubiquitin-dependent protein catabolic process	NA	NA	NA	NA	C19	NA	NA	Up	0.473872	No	Down	0.275996	No	Down	0.0500083	No
Ophcf2|00082	scaffold_01:349829-351712	Alive	Dead	OK	133.954	104.952	-0.352005	-0.772478	0.0762	0.146596	no	Ubiquitin carboxyl-terminal hydrolase	PF00443|UCH; PF13423|UCH_1; PF02148|zf-UBP;	NA	NA	NA	GO:0006464|cellular protein modification process; GO:0003674|molecular_function; GO:0019783|ubiquitin-like protein-specific protease activity; GO:0071704|organic substance metabolic process; GO:0009987|cellular process; GO:0044267|cellular protein metabolic process; GO:0043412|macromolecule modification; GO:0016579|protein deubiquitination; GO:0140096|catalytic activity, acting on a protein; GO:0…	NA	MER094096 - family C19 unassigned peptidases (Phaeosphaeria nodorum) [C19.UPW]#C19#; MER142700 - family C19 unassigned peptidases (Pyrenophora tritici) [C19.UPW]#C19#; MER141822 - ubiquitin-specific peptidase 8 {{Saccharomyces cerevisiae}}-like peptidase (Debaryomyces hansenii) [C19.087]#C19#; MER118759 - family C19 unassigned peptidases (Laccaria bicolor) [C19.UPW]#C19#; MER002476 - ubiquitin-sp…	NA	Ophio5|266	0.938	999.194	0	0.9671	139.093	168.301	105.951	PF00443.24|UCH;PF13423.1|UCH_1;PF02148.14|zf-UBP	GO:0008270|zinc ion binding;GO:0006511|ubiquitin-dependent protein catabolic process	NA	NA	NA	NA	C19	NA	NA	Up	0.473872	No	Down	0.275996	No	Down	0.0500083	No
Ophcf2|00083	scaffold_01:351925-353071	Alive	Dead	OK	211.499	137.071	-0.625729	-1.38838	0.0017	0.00573311	yes	Protein-lysine N-methyltransferase EFM5	PF10237|N6-adenineMlase;	NA	NA	NA	NA	NA	NA	NA	Ophio5|267	0.617	248.825	3.45e-84	0.9369	173.566	123.129	71.1801	PF10237.4|N6-adenineMlase	NA	NA	NA	NA	NA	NA	NA	NA	Down	0.139378	No	Down	0.000285532	Yes	Down	0.0135482	No
Ophcf2|00083	scaffold_01:351925-353071	Dead	Fungus	OK	137.071	269.023	0.972806	2.19366	5e-05	0.000237974	yes	Protein-lysine N-methyltransferase EFM5	PF10237|N6-adenineMlase;	NA	NA	NA	NA	NA	NA	NA	Ophio5|267	0.617	248.825	3.45e-84	0.9369	173.566	123.129	71.1801	PF10237.4|N6-adenineMlase	NA	NA	NA	NA	NA	NA	NA	NA	Down	0.139378	No	Down	0.000285532	Yes	Down	0.0135482	No
Ophcf2|00083	scaffold_01:351925-353071	Alive	Fungus	OK	211.499	269.023	0.347077	0.795275	0.1248	0.218076	no	Protein-lysine N-methyltransferase EFM5	PF10237|N6-adenineMlase;	NA	NA	NA	NA	NA	NA	NA	Ophio5|267	0.617	248.825	3.45e-84	0.9369	173.566	123.129	71.1801	PF10237.4|N6-adenineMlase	NA	NA	NA	NA	NA	NA	NA	NA	Down	0.139378	No	Down	0.000285532	Yes	Down	0.0135482	No
Ophcf2|00084	scaffold_01:401222-402797	Alive	Fungus	OK	343.053	362.807	0.0807704	0.155715	0.7548	0.837976	no	NADH-ubiquinone oxidoreductase 40 kDa subunit-like protein	PF16363|GDP_Man_Dehyd; PF01370|Epimerase; PF13460|NAD_binding_10; PF05368|NmrA; PF01073|3Beta_HSD;	NA	NA	NA	GO:0006694|steroid biosynthetic process; GO:0016614|oxidoreductase activity, acting on CH-OH group of donors; GO:0003674|molecular_function; GO:0071704|organic substance metabolic process; GO:0006629|lipid metabolic process; GO:0003854|3-beta-hydroxy-delta5-steroid dehydrogenase activity; GO:0005488|binding; GO:0016229|steroid dehydrogenase activity; GO:0048037|cofactor binding; GO:0055114|oxidat…	NA	NA	NA	Ophio5|1191	0.657	462.611	1.22e-164	0.9813	175.723	124.221	90.9584	PF05368.8|NmrA;PF13460.1|NAD_binding_10;PF01370.16|Epimerase;PF01073.14|3Beta_HSD;PF00106.20|adh_short	GO:0003854|3-beta-hydroxy-delta5-steroid dehydrogenase activity;GO:0016491|oxidoreductase activity;GO:0055114|oxidation-reduction process;GO:0044237|cellular metabolic process;GO:0008152|metabolic process;GO:0050662|coenzyme binding;GO:0006694|steroid biosynthetic process;GO:0003824|catalytic activity;GO:0016616|oxidoreductase activity, acting on the CH-OH group of donors, NAD or NADP as acceptor	NA	NA	NA	NA	NA	NA	NA	Down	0.141219	No	Down	0.00164691	No	Down	0.172501	No
Ophcf2|00084	scaffold_01:401222-402797	Alive	Dead	OK	343.053	227.839	-0.590416	-1.16412	0.00785	0.0219275	yes	NADH-ubiquinone oxidoreductase 40 kDa subunit-like protein	PF16363|GDP_Man_Dehyd; PF01370|Epimerase; PF13460|NAD_binding_10; PF05368|NmrA; PF01073|3Beta_HSD;	NA	NA	NA	GO:0006694|steroid biosynthetic process; GO:0016614|oxidoreductase activity, acting on CH-OH group of donors; GO:0003674|molecular_function; GO:0071704|organic substance metabolic process; GO:0006629|lipid metabolic process; GO:0003854|3-beta-hydroxy-delta5-steroid dehydrogenase activity; GO:0005488|binding; GO:0016229|steroid dehydrogenase activity; GO:0048037|cofactor binding; GO:0055114|oxidat…	NA	NA	NA	Ophio5|1191	0.657	462.611	1.22e-164	0.9813	175.723	124.221	90.9584	PF05368.8|NmrA;PF13460.1|NAD_binding_10;PF01370.16|Epimerase;PF01073.14|3Beta_HSD;PF00106.20|adh_short	GO:0003854|3-beta-hydroxy-delta5-steroid dehydrogenase activity;GO:0016491|oxidoreductase activity;GO:0055114|oxidation-reduction process;GO:0044237|cellular metabolic process;GO:0008152|metabolic process;GO:0050662|coenzyme binding;GO:0006694|steroid biosynthetic process;GO:0003824|catalytic activity;GO:0016616|oxidoreductase activity, acting on the CH-OH group of donors, NAD or NADP as acceptor	NA	NA	NA	NA	NA	NA	NA	Down	0.141219	No	Down	0.00164691	No	Down	0.172501	No
Ophcf2|00084	scaffold_01:401222-402797	Dead	Fungus	OK	227.839	362.807	0.671186	1.36572	0.00725	0.0204555	yes	NADH-ubiquinone oxidoreductase 40 kDa subunit-like protein	PF16363|GDP_Man_Dehyd; PF01370|Epimerase; PF13460|NAD_binding_10; PF05368|NmrA; PF01073|3Beta_HSD;	NA	NA	NA	GO:0006694|steroid biosynthetic process; GO:0016614|oxidoreductase activity, acting on CH-OH group of donors; GO:0003674|molecular_function; GO:0071704|organic substance metabolic process; GO:0006629|lipid metabolic process; GO:0003854|3-beta-hydroxy-delta5-steroid dehydrogenase activity; GO:0005488|binding; GO:0016229|steroid dehydrogenase activity; GO:0048037|cofactor binding; GO:0055114|oxidat…	NA	NA	NA	Ophio5|1191	0.657	462.611	1.22e-164	0.9813	175.723	124.221	90.9584	PF05368.8|NmrA;PF13460.1|NAD_binding_10;PF01370.16|Epimerase;PF01073.14|3Beta_HSD;PF00106.20|adh_short	GO:0003854|3-beta-hydroxy-delta5-steroid dehydrogenase activity;GO:0016491|oxidoreductase activity;GO:0055114|oxidation-reduction process;GO:0044237|cellular metabolic process;GO:0008152|metabolic process;GO:0050662|coenzyme binding;GO:0006694|steroid biosynthetic process;GO:0003824|catalytic activity;GO:0016616|oxidoreductase activity, acting on the CH-OH group of donors, NAD or NADP as acceptor	NA	NA	NA	NA	NA	NA	NA	Down	0.141219	No	Down	0.00164691	No	Down	0.172501	No
Ophcf2|00085	scaffold_01:434782-435289	Alive	Fungus	OK	10826.3	1963.54	-2.46301	-3.80099	5e-05	0.000237974	yes	Histone H2A	PF16211|Histone_H2A_C; PF00808|CBFD_NFYB_HMF; PF00125|Histone;	NA	NA	Histone-like TF;	GO:0005575|cellular_component; GO:0044446|intracellular organelle part; GO:0005488|binding; GO:0000786|nucleosome; GO:0003677|DNA binding; GO:0097159|organic cyclic compound binding; GO:0044424|intracellular part; GO:0003674|molecular_function; GO:0032993|protein-DNA complex; GO:0044815|DNA packaging complex; GO:0044422|organelle part; GO:0044427|chromosomal part; GO:0003676|nucleic acid binding;…	NA	NA	NA	Ophio5|676	0.993	262.692	1e-92	0.9926	1859.26	10125.8	7113.79	PF00125.19|Histone;PF00808.18|CBFD_NFYB_HMF	GO:0043565|sequence-specific DNA binding;GO:0003677|DNA binding;GO:0005622|intracellular	NA	NA	Heteromeric CCAAT factors	NA	NA	NA	NA	Up	0.000285532	Yes	Up	0.000285532	Yes	Down	0.421546	No
Ophcf2|00085	scaffold_01:434782-435289	Dead	Fungus	OK	15563	1963.54	-2.98659	-4.58618	5e-05	0.000237974	yes	Histone H2A	PF16211|Histone_H2A_C; PF00808|CBFD_NFYB_HMF; PF00125|Histone;	NA	NA	Histone-like TF;	GO:0005575|cellular_component; GO:0044446|intracellular organelle part; GO:0005488|binding; GO:0000786|nucleosome; GO:0003677|DNA binding; GO:0097159|organic cyclic compound binding; GO:0044424|intracellular part; GO:0003674|molecular_function; GO:0032993|protein-DNA complex; GO:0044815|DNA packaging complex; GO:0044422|organelle part; GO:0044427|chromosomal part; GO:0003676|nucleic acid binding;…	NA	NA	NA	Ophio5|676	0.993	262.692	1e-92	0.9926	1859.26	10125.8	7113.79	PF00125.19|Histone;PF00808.18|CBFD_NFYB_HMF	GO:0043565|sequence-specific DNA binding;GO:0003677|DNA binding;GO:0005622|intracellular	NA	NA	Heteromeric CCAAT factors	NA	NA	NA	NA	Up	0.000285532	Yes	Up	0.000285532	Yes	Down	0.421546	No
Ophcf2|00085	scaffold_01:434782-435289	Alive	Dead	OK	10826.3	15563	0.523579	0.692877	0.11375	0.202977	no	Histone H2A	PF16211|Histone_H2A_C; PF00808|CBFD_NFYB_HMF; PF00125|Histone;	NA	NA	Histone-like TF;	GO:0005575|cellular_component; GO:0044446|intracellular organelle part; GO:0005488|binding; GO:0000786|nucleosome; GO:0003677|DNA binding; GO:0097159|organic cyclic compound binding; GO:0044424|intracellular part; GO:0003674|molecular_function; GO:0032993|protein-DNA complex; GO:0044815|DNA packaging complex; GO:0044422|organelle part; GO:0044427|chromosomal part; GO:0003676|nucleic acid binding;…	NA	NA	NA	Ophio5|676	0.993	262.692	1e-92	0.9926	1859.26	10125.8	7113.79	PF00125.19|Histone;PF00808.18|CBFD_NFYB_HMF	GO:0043565|sequence-specific DNA binding;GO:0003677|DNA binding;GO:0005622|intracellular	NA	NA	Heteromeric CCAAT factors	NA	NA	NA	NA	Up	0.000285532	Yes	Up	0.000285532	Yes	Down	0.421546	No
Ophcf2|00086	scaffold_01:435509-436043	Alive	Dead	OK	523.838	441.184	-0.247738	-0.522871	0.23575	0.359576	no	NADH dehydrogenase (ubiquinone) 1 beta subcomplex 9	PF05347|Complex1_LYR;	NA	NA	NA	NA	NA	NA	NA	Ophio5|675	0.879	182.185	6.35e-62	0.9802	498.996	403.296	486.156	PF05347.10|Complex1_LYR;PF13232.1|Complex1_LYR_1	NA	NA	NA	NA	NA	NA	NA	NA	Down	0.398563	No	Down	0.927568	No	Up	0.474222	No
Ophcf2|00086	scaffold_01:435509-436043	Alive	Fungus	OK	523.838	656.051	0.324689	0.702547	0.17375	0.283665	no	NADH dehydrogenase (ubiquinone) 1 beta subcomplex 9	PF05347|Complex1_LYR;	NA	NA	NA	NA	NA	NA	NA	Ophio5|675	0.879	182.185	6.35e-62	0.9802	498.996	403.296	486.156	PF05347.10|Complex1_LYR;PF13232.1|Complex1_LYR_1	NA	NA	NA	NA	NA	NA	NA	NA	Down	0.398563	No	Down	0.927568	No	Up	0.474222	No
Ophcf2|00086	scaffold_01:435509-436043	Dead	Fungus	OK	441.184	656.051	0.572427	1.26024	0.0156	0.0394573	yes	NADH dehydrogenase (ubiquinone) 1 beta subcomplex 9	PF05347|Complex1_LYR;	NA	NA	NA	NA	NA	NA	NA	Ophio5|675	0.879	182.185	6.35e-62	0.9802	498.996	403.296	486.156	PF05347.10|Complex1_LYR;PF13232.1|Complex1_LYR_1	NA	NA	NA	NA	NA	NA	NA	NA	Down	0.398563	No	Down	0.927568	No	Up	0.474222	No
Ophcf2|00087	scaffold_01:533532-536994	Alive	Dead	OK	149.08	155.174	0.0577992	0.108018	0.80325	0.872588	no	isoleucyl-tRNA synthetase	PF09334|tRNA-synt_1g; PF00133|tRNA-synt_1; PF08264|Anticodon_1;	NA	NA	NA	GO:0035639|purine ribonucleoside triphosphate binding; GO:0016874|ligase activity; GO:0097159|organic cyclic compound binding; GO:0043436|oxoacid metabolic process; GO:0003674|molecular_function; GO:0019752|carboxylic acid metabolic process; GO:0032553|ribonucleotide binding; GO:0071704|organic substance metabolic process; GO:0009987|cellular process; GO:0008144|drug binding; GO:0005488|binding; …	NA	NA	NA	Ophio5|4550	0.897	2010.73	0	0.9991	119.139	134.844	96.6988	PF00133.17|tRNA-synt_1;PF08264.8|Anticodon_1;PF09334.6|tRNA-synt_1g	GO:0004812|aminoacyl-tRNA ligase activity;GO:0005524|ATP binding;GO:0000166|nucleotide binding;GO:0006418|tRNA aminoacylation for protein translation	NA	NA	NA	NA	NA	NA	NA	Up	0.691511	No	Down	0.44976	No	Down	0.22717	No
Ophcf2|00087	scaffold_01:533532-536994	Alive	Fungus	OK	149.08	175.906	0.238719	0.444623	0.38015	0.517405	no	isoleucyl-tRNA synthetase	PF09334|tRNA-synt_1g; PF00133|tRNA-synt_1; PF08264|Anticodon_1;	NA	NA	NA	GO:0035639|purine ribonucleoside triphosphate binding; GO:0016874|ligase activity; GO:0097159|organic cyclic compound binding; GO:0043436|oxoacid metabolic process; GO:0003674|molecular_function; GO:0019752|carboxylic acid metabolic process; GO:0032553|ribonucleotide binding; GO:0071704|organic substance metabolic process; GO:0009987|cellular process; GO:0008144|drug binding; GO:0005488|binding; …	NA	NA	NA	Ophio5|4550	0.897	2010.73	0	0.9991	119.139	134.844	96.6988	PF00133.17|tRNA-synt_1;PF08264.8|Anticodon_1;PF09334.6|tRNA-synt_1g	GO:0004812|aminoacyl-tRNA ligase activity;GO:0005524|ATP binding;GO:0000166|nucleotide binding;GO:0006418|tRNA aminoacylation for protein translation	NA	NA	NA	NA	NA	NA	NA	Up	0.691511	No	Down	0.44976	No	Down	0.22717	No
Ophcf2|00087	scaffold_01:533532-536994	Dead	Fungus	OK	155.174	175.906	0.180919	0.33654	0.50555	0.636289	no	isoleucyl-tRNA synthetase	PF09334|tRNA-synt_1g; PF00133|tRNA-synt_1; PF08264|Anticodon_1;	NA	NA	NA	GO:0035639|purine ribonucleoside triphosphate binding; GO:0016874|ligase activity; GO:0097159|organic cyclic compound binding; GO:0043436|oxoacid metabolic process; GO:0003674|molecular_function; GO:0019752|carboxylic acid metabolic process; GO:0032553|ribonucleotide binding; GO:0071704|organic substance metabolic process; GO:0009987|cellular process; GO:0008144|drug binding; GO:0005488|binding; …	NA	NA	NA	Ophio5|4550	0.897	2010.73	0	0.9991	119.139	134.844	96.6988	PF00133.17|tRNA-synt_1;PF08264.8|Anticodon_1;PF09334.6|tRNA-synt_1g	GO:0004812|aminoacyl-tRNA ligase activity;GO:0005524|ATP binding;GO:0000166|nucleotide binding;GO:0006418|tRNA aminoacylation for protein translation	NA	NA	NA	NA	NA	NA	NA	Up	0.691511	No	Down	0.44976	No	Down	0.22717	No
Ophcf2|00088	scaffold_01:590462-592917	Alive	Dead	OK	114.371	109.064	-0.0685402	-0.14339	0.73915	0.826669	no	Ribosome biogenesis protein erb1	PF08145|BOP1NT; PF00400|WD40;	NA	NA	NA	GO:0003674|molecular_function; GO:0071704|organic substance metabolic process; GO:0009987|cellular process; GO:0034470|ncRNA processing; GO:0043170|macromolecule metabolic process; GO:0005488|binding; GO:0044237|cellular metabolic process; GO:0006807|nitrogen compound metabolic process; GO:0034660|ncRNA metabolic process; GO:0016072|rRNA metabolic process; GO:0006725|cellular aromatic compound me…	NA	NA	NA	Ophio5|4548	0.766	1131.32	0	0.9389	42.7855	99.0752	99.805	PF08145.7|BOP1NT;PF00400.27|WD40;PF00400.27|WD40;PF00400.27|WD40	GO:0005515|protein binding;GO:0006364|rRNA processing	NA	NA	NA	NA	NA	NA	NA	Up	0.000285532	Yes	Up	0.000285532	Yes	Up	0.981198	No
Ophcf2|00088	scaffold_01:590462-592917	Dead	Fungus	OK	109.064	121.063	0.150584	0.314473	0.5324	0.659727	no	Ribosome biogenesis protein erb1	PF08145|BOP1NT; PF00400|WD40;	NA	NA	NA	GO:0003674|molecular_function; GO:0071704|organic substance metabolic process; GO:0009987|cellular process; GO:0034470|ncRNA processing; GO:0043170|macromolecule metabolic process; GO:0005488|binding; GO:0044237|cellular metabolic process; GO:0006807|nitrogen compound metabolic process; GO:0034660|ncRNA metabolic process; GO:0016072|rRNA metabolic process; GO:0006725|cellular aromatic compound me…	NA	NA	NA	Ophio5|4548	0.766	1131.32	0	0.9389	42.7855	99.0752	99.805	PF08145.7|BOP1NT;PF00400.27|WD40;PF00400.27|WD40;PF00400.27|WD40	GO:0005515|protein binding;GO:0006364|rRNA processing	NA	NA	NA	NA	NA	NA	NA	Up	0.000285532	Yes	Up	0.000285532	Yes	Up	0.981198	No
Ophcf2|00088	scaffold_01:590462-592917	Alive	Fungus	OK	114.371	121.063	0.0820435	0.171091	0.7312	0.820261	no	Ribosome biogenesis protein erb1	PF08145|BOP1NT; PF00400|WD40;	NA	NA	NA	GO:0003674|molecular_function; GO:0071704|organic substance metabolic process; GO:0009987|cellular process; GO:0034470|ncRNA processing; GO:0043170|macromolecule metabolic process; GO:0005488|binding; GO:0044237|cellular metabolic process; GO:0006807|nitrogen compound metabolic process; GO:0034660|ncRNA metabolic process; GO:0016072|rRNA metabolic process; GO:0006725|cellular aromatic compound me…	NA	NA	NA	Ophio5|4548	0.766	1131.32	0	0.9389	42.7855	99.0752	99.805	PF08145.7|BOP1NT;PF00400.27|WD40;PF00400.27|WD40;PF00400.27|WD40	GO:0005515|protein binding;GO:0006364|rRNA processing	NA	NA	NA	NA	NA	NA	NA	Up	0.000285532	Yes	Up	0.000285532	Yes	Up	0.981198	No
Ophcf2|00089	scaffold_01:593177-594964	Dead	Fungus	OK	308.372	666.852	1.1127	1.95889	0.0002	0.000851223	yes	Stress response protein ish1	PF10281|Ish1;	Has signal peptide;	NA	NA	NA	NA	NA	NA	Ophio5|4547	0.853	877.085	0	0.9982	677.997	126.246	177.86	PF10281.4|Ish1;PF10281.4|Ish1;PF10281.4|Ish1;PF10281.4|Ish1	NA	NA	SignalP: has predicted secretion signal	NA	NA	NA	NA	NA	Down	0.000285532	Yes	Down	0.000285532	Yes	Up	0.188826	No
Ophcf2|00089	scaffold_01:593177-594964	Alive	Fungus	OK	230.754	666.852	1.53101	2.70703	5e-05	0.000237974	yes	Stress response protein ish1	PF10281|Ish1;	Has signal peptide;	NA	NA	NA	NA	NA	NA	Ophio5|4547	0.853	877.085	0	0.9982	677.997	126.246	177.86	PF10281.4|Ish1;PF10281.4|Ish1;PF10281.4|Ish1;PF10281.4|Ish1	NA	NA	SignalP: has predicted secretion signal	NA	NA	NA	NA	NA	Down	0.000285532	Yes	Down	0.000285532	Yes	Up	0.188826	No
Ophcf2|00089	scaffold_01:593177-594964	Alive	Dead	OK	230.754	308.372	0.418318	0.780976	0.07855	0.150219	no	Stress response protein ish1	PF10281|Ish1;	Has signal peptide;	NA	NA	NA	NA	NA	NA	Ophio5|4547	0.853	877.085	0	0.9982	677.997	126.246	177.86	PF10281.4|Ish1;PF10281.4|Ish1;PF10281.4|Ish1;PF10281.4|Ish1	NA	NA	SignalP: has predicted secretion signal	NA	NA	NA	NA	NA	Down	0.000285532	Yes	Down	0.000285532	Yes	Up	0.188826	No
Ophcf2|00090	scaffold_01:674309-679331	Dead	Fungus	OK	25.6317	37.0983	0.533424	1.18077	0.024	0.0568192	no	cation channel family protein	PF00520|Ion_trans;	NA	NA	NA	GO:0022857|transmembrane transporter activity; GO:0051234|establishment of localization; GO:0015075|ion transmembrane transporter activity; GO:0005575|cellular_component; GO:0003674|molecular_function; GO:0006810|transport; GO:0008150|biological_process; GO:0055085|transmembrane transport; GO:0005216|ion channel activity; GO:0015267|channel activity; GO:0006811|ion transport; GO:0051179|localizat…	NA	NA	19;	Ophio5|7786	0.845	2642.45	0	0.9922	73.1044	71.8032	46.6339	PF00520.26|Ion_trans;PF00520.26|Ion_trans;PF00520.26|Ion_trans;PF00520.26|Ion_trans	GO:0016020|membrane;GO:0005216|ion channel activity;GO:0006811|ion transport;GO:0055085|transmembrane transport	NA	NA	NA	20	NA	NA	NA	Down	0.95717	No	Down	0.0877451	No	Down	0.098192	No
Ophcf2|00090	scaffold_01:674309-679331	Alive	Fungus	OK	33.4088	37.0983	0.151125	0.331943	0.52505	0.653359	no	cation channel family protein	PF00520|Ion_trans;	NA	NA	NA	GO:0022857|transmembrane transporter activity; GO:0051234|establishment of localization; GO:0015075|ion transmembrane transporter activity; GO:0005575|cellular_component; GO:0003674|molecular_function; GO:0006810|transport; GO:0008150|biological_process; GO:0055085|transmembrane transport; GO:0005216|ion channel activity; GO:0015267|channel activity; GO:0006811|ion transport; GO:0051179|localizat…	NA	NA	19;	Ophio5|7786	0.845	2642.45	0	0.9922	73.1044	71.8032	46.6339	PF00520.26|Ion_trans;PF00520.26|Ion_trans;PF00520.26|Ion_trans;PF00520.26|Ion_trans	GO:0016020|membrane;GO:0005216|ion channel activity;GO:0006811|ion transport;GO:0055085|transmembrane transport	NA	NA	NA	20	NA	NA	NA	Down	0.95717	No	Down	0.0877451	No	Down	0.098192	No
Ophcf2|00090	scaffold_01:674309-679331	Alive	Dead	OK	33.4088	25.6317	-0.382299	-0.838719	0.061	0.122329	no	cation channel family protein	PF00520|Ion_trans;	NA	NA	NA	GO:0022857|transmembrane transporter activity; GO:0051234|establishment of localization; GO:0015075|ion transmembrane transporter activity; GO:0005575|cellular_component; GO:0003674|molecular_function; GO:0006810|transport; GO:0008150|biological_process; GO:0055085|transmembrane transport; GO:0005216|ion channel activity; GO:0015267|channel activity; GO:0006811|ion transport; GO:0051179|localizat…	NA	NA	19;	Ophio5|7786	0.845	2642.45	0	0.9922	73.1044	71.8032	46.6339	PF00520.26|Ion_trans;PF00520.26|Ion_trans;PF00520.26|Ion_trans;PF00520.26|Ion_trans	GO:0016020|membrane;GO:0005216|ion channel activity;GO:0006811|ion transport;GO:0055085|transmembrane transport	NA	NA	NA	20	NA	NA	NA	Down	0.95717	No	Down	0.0877451	No	Down	0.098192	No
Ophcf2|00091	scaffold_01:690208-692803	Alive	Fungus	OK	129.56	207.41	0.678866	1.40574	0.00745	0.0209622	yes	Putative membrane protein C3B8.06	PF10355|Ytp1; PF10348|DUF2427;	Has signal peptide;	NA	NA	NA	NA	NA	9;	Ophio5|588	0.621	549.666	0	0.9913	83.7313	58.206	58.1966	PF10355.4|Ytp1;PF10348.4|DUF2427	NA	NA	NA	NA	11	NA	NA	NA	Down	0.117617	No	Down	0.10986	No	Down	0.998842	No
Ophcf2|00091	scaffold_01:690208-692803	Alive	Dead	OK	129.56	79.0381	-0.713002	-1.52855	0.0006	0.00228657	yes	Putative membrane protein C3B8.06	PF10355|Ytp1; PF10348|DUF2427;	Has signal peptide;	NA	NA	NA	NA	NA	9;	Ophio5|588	0.621	549.666	0	0.9913	83.7313	58.206	58.1966	PF10355.4|Ytp1;PF10348.4|DUF2427	NA	NA	NA	NA	11	NA	NA	NA	Down	0.117617	No	Down	0.10986	No	Down	0.998842	No
Ophcf2|00091	scaffold_01:690208-692803	Dead	Fungus	OK	79.0381	207.41	1.39187	3.00615	5e-05	0.000237974	yes	Putative membrane protein C3B8.06	PF10355|Ytp1; PF10348|DUF2427;	Has signal peptide;	NA	NA	NA	NA	NA	9;	Ophio5|588	0.621	549.666	0	0.9913	83.7313	58.206	58.1966	PF10355.4|Ytp1;PF10348.4|DUF2427	NA	NA	NA	NA	11	NA	NA	NA	Down	0.117617	No	Down	0.10986	No	Down	0.998842	No
Ophcf2|00092	scaffold_01:715387-717010	Alive	Fungus	OK	182.57	104.027	-0.811497	-1.81231	0.00085	0.00311493	yes	velvet 2	PF11754|Velvet;	NA	NA	NA	NA	NA	NA	NA	Ophio5|5338	0.61	368.237	1.16e-125	0.9171	246.901	228.008	200.325	PF11754.3|Velvet	NA	NA	NA	NA	NA	NA	NA	NA	Down	0.795462	No	Down	0.438459	No	Down	0.655443	No
Ophcf2|00092	scaffold_01:715387-717010	Alive	Dead	OK	182.57	142.222	-0.360309	-0.792959	0.0669	0.131604	no	velvet 2	PF11754|Velvet;	NA	NA	NA	NA	NA	NA	NA	Ophio5|5338	0.61	368.237	1.16e-125	0.9171	246.901	228.008	200.325	PF11754.3|Velvet	NA	NA	NA	NA	NA	NA	NA	NA	Down	0.795462	No	Down	0.438459	No	Down	0.655443	No
Ophcf2|00092	scaffold_01:715387-717010	Dead	Fungus	OK	142.222	104.027	-0.451188	-1.02543	0.04155	0.0896054	no	velvet 2	PF11754|Velvet;	NA	NA	NA	NA	NA	NA	NA	Ophio5|5338	0.61	368.237	1.16e-125	0.9171	246.901	228.008	200.325	PF11754.3|Velvet	NA	NA	NA	NA	NA	NA	NA	NA	Down	0.795462	No	Down	0.438459	No	Down	0.655443	No
Ophcf2|00093	scaffold_01:717806-718951	Dead	Fungus	OK	241.644	314.514	0.380239	0.805996	0.1088	0.195682	no	ATP phosphoribosyltransferase	PF01634|HisG; PF08029|HisG_C;	NA	NA	NA	GO:0018130|heterocycle biosynthetic process; GO:0005575|cellular_component; GO:0016763|transferase activity, transferring pentosyl groups; GO:0043436|oxoacid metabolic process; GO:0003674|molecular_function; GO:0019752|carboxylic acid metabolic process; GO:0016757|transferase activity, transferring glycosyl groups; GO:0008652|cellular amino acid biosynthetic process; GO:0071704|organic substance …	NA	NA	NA	Ophio5|1345	0.824	527.324	0	0.9938	584.331	287.895	218.101	PF01634.13|HisG;PF08029.6|HisG_C	GO:0005737|cytoplasm;GO:0000287|magnesium ion binding;GO:0003879|ATP phosphoribosyltransferase activity;GO:0000105|histidine biosynthetic process	NA	NA	NA	NA	NA	NA	NA	Down	0.00393484	Yes	Down	0.000285532	Yes	Down	0.280005	No
Ophcf2|00093	scaffold_01:717806-718951	Alive	Fungus	OK	322.285	314.514	-0.03521	-0.0705591	0.88545	0.926604	no	ATP phosphoribosyltransferase	PF01634|HisG; PF08029|HisG_C;	NA	NA	NA	GO:0018130|heterocycle biosynthetic process; GO:0005575|cellular_component; GO:0016763|transferase activity, transferring pentosyl groups; GO:0043436|oxoacid metabolic process; GO:0003674|molecular_function; GO:0019752|carboxylic acid metabolic process; GO:0016757|transferase activity, transferring glycosyl groups; GO:0008652|cellular amino acid biosynthetic process; GO:0071704|organic substance …	NA	NA	NA	Ophio5|1345	0.824	527.324	0	0.9938	584.331	287.895	218.101	PF01634.13|HisG;PF08029.6|HisG_C	GO:0005737|cytoplasm;GO:0000287|magnesium ion binding;GO:0003879|ATP phosphoribosyltransferase activity;GO:0000105|histidine biosynthetic process	NA	NA	NA	NA	NA	NA	NA	Down	0.00393484	Yes	Down	0.000285532	Yes	Down	0.280005	No
Ophcf2|00093	scaffold_01:717806-718951	Alive	Dead	OK	322.285	241.644	-0.415449	-0.844557	0.05755	0.116877	no	ATP phosphoribosyltransferase	PF01634|HisG; PF08029|HisG_C;	NA	NA	NA	GO:0018130|heterocycle biosynthetic process; GO:0005575|cellular_component; GO:0016763|transferase activity, transferring pentosyl groups; GO:0043436|oxoacid metabolic process; GO:0003674|molecular_function; GO:0019752|carboxylic acid metabolic process; GO:0016757|transferase activity, transferring glycosyl groups; GO:0008652|cellular amino acid biosynthetic process; GO:0071704|organic substance …	NA	NA	NA	Ophio5|1345	0.824	527.324	0	0.9938	584.331	287.895	218.101	PF01634.13|HisG;PF08029.6|HisG_C	GO:0005737|cytoplasm;GO:0000287|magnesium ion binding;GO:0003879|ATP phosphoribosyltransferase activity;GO:0000105|histidine biosynthetic process	NA	NA	NA	NA	NA	NA	NA	Down	0.00393484	Yes	Down	0.000285532	Yes	Down	0.280005	No
Ophcf2|00094	scaffold_01:832346-833843	Alive	Dead	OK	132.562	101.353	-0.387282	-0.841566	0.05495	0.112604	no	histone deacetylase phd1	PF00850|Hist_deacetyl;	NA	NA	NA	NA	NA	NA	NA	Ophio5|126	0.928	979.163	0	0.998	263.386	235.115	206.089	PF00850.14|Hist_deacetyl	NA	NA	NA	NA	NA	NA	NA	NA	Down	0.703986	No	Down	0.364794	No	Down	0.645416	No
Ophcf2|00094	scaffold_01:832346-833843	Dead	Fungus	OK	101.353	85.3951	-0.247166	-0.562738	0.26275	0.390379	no	histone deacetylase phd1	PF00850|Hist_deacetyl;	NA	NA	NA	NA	NA	NA	NA	Ophio5|126	0.928	979.163	0	0.998	263.386	235.115	206.089	PF00850.14|Hist_deacetyl	NA	NA	NA	NA	NA	NA	NA	NA	Down	0.703986	No	Down	0.364794	No	Down	0.645416	No
Ophcf2|00094	scaffold_01:832346-833843	Alive	Fungus	OK	132.562	85.3951	-0.634448	-1.39543	0.00665	0.0189736	yes	histone deacetylase phd1	PF00850|Hist_deacetyl;	NA	NA	NA	NA	NA	NA	NA	Ophio5|126	0.928	979.163	0	0.998	263.386	235.115	206.089	PF00850.14|Hist_deacetyl	NA	NA	NA	NA	NA	NA	NA	NA	Down	0.703986	No	Down	0.364794	No	Down	0.645416	No
Ophcf2|00095	scaffold_01:834258-835609	Alive	Dead	OK	1605.66	1534.87	-0.0650499	-0.0926089	0.833	0.893254	no	Secreted beta-glucosidase sun1	PF03856|SUN;	Has signal peptide;	NA	NA	NA	NA	NA	NA	Ophio5|125	0.753	664.455	0	0.9977	498.462	722.16	690.564	PF03856.8|SUN	NA	NA	SignalP: has predicted secretion signal	NA	NA	NA	NA	NA	Up	0.278738	No	Up	0.274158	No	Down	0.914863	No
Ophcf2|00095	scaffold_01:834258-835609	Dead	Fungus	OK	1534.87	84.4862	-4.18326	-7.51724	5e-05	0.000237974	yes	Secreted beta-glucosidase sun1	PF03856|SUN;	Has signal peptide;	NA	NA	NA	NA	NA	NA	Ophio5|125	0.753	664.455	0	0.9977	498.462	722.16	690.564	PF03856.8|SUN	NA	NA	SignalP: has predicted secretion signal	NA	NA	NA	NA	NA	Up	0.278738	No	Up	0.274158	No	Down	0.914863	No
Ophcf2|00095	scaffold_01:834258-835609	Alive	Fungus	OK	1605.66	84.4862	-4.24831	-6.96579	5e-05	0.000237974	yes	Secreted beta-glucosidase sun1	PF03856|SUN;	Has signal peptide;	NA	NA	NA	NA	NA	NA	Ophio5|125	0.753	664.455	0	0.9977	498.462	722.16	690.564	PF03856.8|SUN	NA	NA	SignalP: has predicted secretion signal	NA	NA	NA	NA	NA	Up	0.278738	No	Up	0.274158	No	Down	0.914863	No
Ophcf2|00096	scaffold_01:836754-839405	Alive	Dead	OK	143.976	75.6063	-0.929254	-1.90211	5e-05	0.000237974	yes	tRNA ligase	PF08302|tRNA_lig_CPD; PF08303|tRNA_lig_kinase; PF09511|RNA_lig_T4_1;	NA	NA	NA	GO:0035639|purine ribonucleoside triphosphate binding; GO:0016874|ligase activity; GO:0097159|organic cyclic compound binding; GO:0003674|molecular_function; GO:0032553|ribonucleotide binding; GO:0071704|organic substance metabolic process; GO:0009987|cellular process; GO:0008144|drug binding; GO:0005488|binding; GO:0034470|ncRNA processing; GO:0043170|macromolecule metabolic process; GO:0044237|…	NA	NA	NA	Ophio5|4543	0.624	1089.33	0	0.9869	181.261	131.296	180.087	PF09511.5|RNA_lig_T4_1;PF08302.6|tRNA_lig_CPD;PF08303.6|tRNA_lig_kinase	GO:0006388|tRNA splicing, via endonucleolytic cleavage and ligation;GO:0005524|ATP binding;GO:0003972|RNA ligase (ATP) activity	NA	NA	NA	NA	NA	NA	NA	Down	0.22954	No	Down	0.985903	No	Up	0.24015	No
Ophcf2|00096	scaffold_01:836754-839405	Dead	Fungus	OK	75.6063	141.495	0.904173	1.87425	0.00045	0.00176803	yes	tRNA ligase	PF08302|tRNA_lig_CPD; PF08303|tRNA_lig_kinase; PF09511|RNA_lig_T4_1;	NA	NA	NA	GO:0035639|purine ribonucleoside triphosphate binding; GO:0016874|ligase activity; GO:0097159|organic cyclic compound binding; GO:0003674|molecular_function; GO:0032553|ribonucleotide binding; GO:0071704|organic substance metabolic process; GO:0009987|cellular process; GO:0008144|drug binding; GO:0005488|binding; GO:0034470|ncRNA processing; GO:0043170|macromolecule metabolic process; GO:0044237|…	NA	NA	NA	Ophio5|4543	0.624	1089.33	0	0.9869	181.261	131.296	180.087	PF09511.5|RNA_lig_T4_1;PF08302.6|tRNA_lig_CPD;PF08303.6|tRNA_lig_kinase	GO:0006388|tRNA splicing, via endonucleolytic cleavage and ligation;GO:0005524|ATP binding;GO:0003972|RNA ligase (ATP) activity	NA	NA	NA	NA	NA	NA	NA	Down	0.22954	No	Down	0.985903	No	Up	0.24015	No
Ophcf2|00096	scaffold_01:836754-839405	Alive	Fungus	OK	143.976	141.495	-0.0250811	-0.0493008	0.9198	0.948969	no	tRNA ligase	PF08302|tRNA_lig_CPD; PF08303|tRNA_lig_kinase; PF09511|RNA_lig_T4_1;	NA	NA	NA	GO:0035639|purine ribonucleoside triphosphate binding; GO:0016874|ligase activity; GO:0097159|organic cyclic compound binding; GO:0003674|molecular_function; GO:0032553|ribonucleotide binding; GO:0071704|organic substance metabolic process; GO:0009987|cellular process; GO:0008144|drug binding; GO:0005488|binding; GO:0034470|ncRNA processing; GO:0043170|macromolecule metabolic process; GO:0044237|…	NA	NA	NA	Ophio5|4543	0.624	1089.33	0	0.9869	181.261	131.296	180.087	PF09511.5|RNA_lig_T4_1;PF08302.6|tRNA_lig_CPD;PF08303.6|tRNA_lig_kinase	GO:0006388|tRNA splicing, via endonucleolytic cleavage and ligation;GO:0005524|ATP binding;GO:0003972|RNA ligase (ATP) activity	NA	NA	NA	NA	NA	NA	NA	Down	0.22954	No	Down	0.985903	No	Up	0.24015	No
Ophcf2|00097	scaffold_01:839581-840211	Dead	Fungus	OK	110.938	65.5781	-0.758462	-1.51093	0.0032	0.00998756	yes	UPF0132 domain protein	NA	NA	NA	NA	NA	NA	NA	3;	Ophio5|4544	0.755	245.743	3.47e-84	0.9947	84.567	111.013	124.174	PF09685.5|Tic20	NA	NA	NA	NA	3	NA	NA	NA	Up	0.290362	No	Up	0.117531	No	Up	0.690969	No
Ophcf2|00097	scaffold_01:839581-840211	Alive	Fungus	OK	104.949	65.5781	-0.678397	-1.33901	0.00875	0.0240737	yes	UPF0132 domain protein	NA	NA	NA	NA	NA	NA	NA	3;	Ophio5|4544	0.755	245.743	3.47e-84	0.9947	84.567	111.013	124.174	PF09685.5|Tic20	NA	NA	NA	NA	3	NA	NA	NA	Up	0.290362	No	Up	0.117531	No	Up	0.690969	No
Ophcf2|00097	scaffold_01:839581-840211	Alive	Dead	OK	104.949	110.938	0.0800654	0.167107	0.6952	0.793999	no	UPF0132 domain protein	NA	NA	NA	NA	NA	NA	NA	3;	Ophio5|4544	0.755	245.743	3.47e-84	0.9947	84.567	111.013	124.174	PF09685.5|Tic20	NA	NA	NA	NA	3	NA	NA	NA	Up	0.290362	No	Up	0.117531	No	Up	0.690969	No
Ophcf2|00098	scaffold_01:840622-841558	Alive	Fungus	OK	159.731	184.03	0.204295	0.460083	0.3642	0.501039	no	predicted protein [	NA	NA	NA	NA	NA	NA	NA	NA	Ophio5|4545	0.709	422.165	2.8e-148	0.9968	141.967	86.0997	118.274	NA	NA	NA	NA	NA	NA	NA	NA	NA	Down	0.0262281	No	Down	0.456014	No	Up	0.169128	No
Ophcf2|00098	scaffold_01:840622-841558	Alive	Dead	OK	159.731	153.129	-0.0608976	-0.137645	0.75355	0.836976	no	predicted protein [	NA	NA	NA	NA	NA	NA	NA	NA	Ophio5|4545	0.709	422.165	2.8e-148	0.9968	141.967	86.0997	118.274	NA	NA	NA	NA	NA	NA	NA	NA	NA	Down	0.0262281	No	Down	0.456014	No	Up	0.169128	No
Ophcf2|00098	scaffold_01:840622-841558	Dead	Fungus	OK	153.129	184.03	0.265192	0.600158	0.24165	0.366476	no	predicted protein [	NA	NA	NA	NA	NA	NA	NA	NA	Ophio5|4545	0.709	422.165	2.8e-148	0.9968	141.967	86.0997	118.274	NA	NA	NA	NA	NA	NA	NA	NA	NA	Down	0.0262281	No	Down	0.456014	No	Up	0.169128	No
Ophcf2|00099	scaffold_01:842072-844574	Alive	Fungus	OK	39.8042	47.1094	0.243094	0.553699	0.2802	0.40984	no	centrin-binding protein Sfi1	PF08457|Sfi1;	NA	NA	NA	NA	NA	NA	NA	Ophio5|4549	0.584	721.85	0	0.9519	39.4799	51.9383	39.4388	PF08457.5|Sfi1	NA	NA	NA	NA	NA	NA	NA	NA	Up	0.248335	No	Down	0.996951	No	Down	0.245342	No
Ophcf2|00099	scaffold_01:842072-844574	Dead	Fungus	OK	36.2682	47.1094	0.377311	0.857851	0.09815	0.180332	no	centrin-binding protein Sfi1	PF08457|Sfi1;	NA	NA	NA	NA	NA	NA	NA	Ophio5|4549	0.584	721.85	0	0.9519	39.4799	51.9383	39.4388	PF08457.5|Sfi1	NA	NA	NA	NA	NA	NA	NA	NA	Up	0.248335	No	Down	0.996951	No	Down	0.245342	No
Ophcf2|00099	scaffold_01:842072-844574	Alive	Dead	OK	39.8042	36.2682	-0.134217	-0.302387	0.49495	0.626456	no	centrin-binding protein Sfi1	PF08457|Sfi1;	NA	NA	NA	NA	NA	NA	NA	Ophio5|4549	0.584	721.85	0	0.9519	39.4799	51.9383	39.4388	PF08457.5|Sfi1	NA	NA	NA	NA	NA	NA	NA	NA	Up	0.248335	No	Down	0.996951	No	Down	0.245342	No
Ophcf2|00100	scaffold_01:845832-847392	Dead	Fungus	OK	145.347	165.778	0.189758	0.413877	0.4135	0.55101	no	26S protease regulatory subunit 6A	PF00004|AAA; PF16450|Prot_ATP_ID_OB; PF17862|AAA_lid_3;	NA	NA	NA	GO:0035639|purine ribonucleoside triphosphate binding; GO:0005488|binding; GO:1901265|nucleoside phosphate binding; GO:0097159|organic cyclic compound binding; GO:0017076|purine nucleotide binding; GO:0003674|molecular_function; GO:0032555|purine ribonucleotide binding; GO:0036094|small molecule binding; GO:0005524|ATP binding; GO:0043167|ion binding; GO:0032553|ribonucleotide binding; GO:0032559…	NA	NA	NA	Ophio5|4546	0.971	895.575	0	0.9978	120.047	148.473	157.234	PF00004.24|AAA	GO:0005524|ATP binding	NA	NA	NA	NA	NA	NA	NA	Up	0.404526	No	Up	0.279852	No	Up	0.8441	No
Ophcf2|00100	scaffold_01:845832-847392	Alive	Fungus	OK	193.903	165.778	-0.226082	-0.48026	0.33755	0.472912	no	26S protease regulatory subunit 6A	PF00004|AAA; PF16450|Prot_ATP_ID_OB; PF17862|AAA_lid_3;	NA	NA	NA	GO:0035639|purine ribonucleoside triphosphate binding; GO:0005488|binding; GO:1901265|nucleoside phosphate binding; GO:0097159|organic cyclic compound binding; GO:0017076|purine nucleotide binding; GO:0003674|molecular_function; GO:0032555|purine ribonucleotide binding; GO:0036094|small molecule binding; GO:0005524|ATP binding; GO:0043167|ion binding; GO:0032553|ribonucleotide binding; GO:0032559…	NA	NA	NA	Ophio5|4546	0.971	895.575	0	0.9978	120.047	148.473	157.234	PF00004.24|AAA	GO:0005524|ATP binding	NA	NA	NA	NA	NA	NA	NA	Up	0.404526	No	Up	0.279852	No	Up	0.8441	No
Ophcf2|00100	scaffold_01:845832-847392	Alive	Dead	OK	193.903	145.347	-0.41584	-0.888741	0.03785	0.0830037	no	26S protease regulatory subunit 6A	PF00004|AAA; PF16450|Prot_ATP_ID_OB; PF17862|AAA_lid_3;	NA	NA	NA	GO:0035639|purine ribonucleoside triphosphate binding; GO:0005488|binding; GO:1901265|nucleoside phosphate binding; GO:0097159|organic cyclic compound binding; GO:0017076|purine nucleotide binding; GO:0003674|molecular_function; GO:0032555|purine ribonucleotide binding; GO:0036094|small molecule binding; GO:0005524|ATP binding; GO:0043167|ion binding; GO:0032553|ribonucleotide binding; GO:0032559…	NA	NA	NA	Ophio5|4546	0.971	895.575	0	0.9978	120.047	148.473	157.234	PF00004.24|AAA	GO:0005524|ATP binding	NA	NA	NA	NA	NA	NA	NA	Up	0.404526	No	Up	0.279852	No	Up	0.8441	No
Ophcf2|00101	scaffold_01:848199-848737	Alive	Dead	OK	60.9641	48.1948	-0.339085	-0.536907	0.2267	0.348856	no	acetate non-utilizing protein 9, mitochondrial	PF13233|Complex1_LYR_2; PF05347|Complex1_LYR;	NA	NA	NA	NA	NA	NA	NA	Ophio5|397	0.657	145.976	7.15e-47	0.7609	54.1035	34.995	34.3955	PF05347.10|Complex1_LYR;PF13232.1|Complex1_LYR_1;PF13233.1|Complex1_LYR_2	NA	NA	NA	NA	NA	NA	NA	NA	Down	0.222572	No	Down	0.200414	No	Down	0.969663	No
Ophcf2|00101	scaffold_01:848199-848737	Dead	Fungus	OK	48.1948	92.0222	0.933106	1.54768	0.0033	0.0102581	yes	acetate non-utilizing protein 9, mitochondrial	PF13233|Complex1_LYR_2; PF05347|Complex1_LYR;	NA	NA	NA	NA	NA	NA	NA	Ophio5|397	0.657	145.976	7.15e-47	0.7609	54.1035	34.995	34.3955	PF05347.10|Complex1_LYR;PF13232.1|Complex1_LYR_1;PF13233.1|Complex1_LYR_2	NA	NA	NA	NA	NA	NA	NA	NA	Down	0.222572	No	Down	0.200414	No	Down	0.969663	No
Ophcf2|00101	scaffold_01:848199-848737	Alive	Fungus	OK	60.9641	92.0222	0.594021	1.00912	0.0527	0.108841	no	acetate non-utilizing protein 9, mitochondrial	PF13233|Complex1_LYR_2; PF05347|Complex1_LYR;	NA	NA	NA	NA	NA	NA	NA	Ophio5|397	0.657	145.976	7.15e-47	0.7609	54.1035	34.995	34.3955	PF05347.10|Complex1_LYR;PF13232.1|Complex1_LYR_1;PF13233.1|Complex1_LYR_2	NA	NA	NA	NA	NA	NA	NA	NA	Down	0.222572	No	Down	0.200414	No	Down	0.969663	No
Ophcf2|00102	scaffold_01:848886-851172	Alive	Fungus	OK	47.1989	46.7725	-0.0130911	-0.0300394	0.9522	0.970696	no	ATP-dependent RNA helicase (Hrh1)	PF00271|Helicase_C; PF04408|HA2; PF07717|OB_NTP_bind;	NA	NA	NA	GO:0003824|catalytic activity; GO:0016787|hydrolase activity; GO:0017111|nucleoside-triphosphatase activity; GO:0016818|hydrolase activity, acting on acid anhydrides, in phosphorus-containing anhydrides; GO:0003674|molecular_function; GO:0016462|pyrophosphatase activity; GO:0004386|helicase activity; GO:0016817|hydrolase activity, acting on acid anhydrides;	NA	NA	NA	Ophio5|398	0.756	1181.39	0	0.9934	58.3973	42.7232	38.6868	PF07717.11|OB_NTP_bind;PF04408.18|HA2;PF00271.26|Helicase_C;PF00270.24|DEAD	GO:0003676|nucleic acid binding;GO:0004386|helicase activity;GO:0005524|ATP binding	NA	NA	NA	NA	NA	NA	NA	Down	0.174132	No	Down	0.0708828	No	Down	0.717887	No
Ophcf2|00102	scaffold_01:848886-851172	Alive	Dead	OK	47.1989	51.173	0.11663	0.264978	0.54795	0.673717	no	ATP-dependent RNA helicase (Hrh1)	PF00271|Helicase_C; PF04408|HA2; PF07717|OB_NTP_bind;	NA	NA	NA	GO:0003824|catalytic activity; GO:0016787|hydrolase activity; GO:0017111|nucleoside-triphosphatase activity; GO:0016818|hydrolase activity, acting on acid anhydrides, in phosphorus-containing anhydrides; GO:0003674|molecular_function; GO:0016462|pyrophosphatase activity; GO:0004386|helicase activity; GO:0016817|hydrolase activity, acting on acid anhydrides;	NA	NA	NA	Ophio5|398	0.756	1181.39	0	0.9934	58.3973	42.7232	38.6868	PF07717.11|OB_NTP_bind;PF04408.18|HA2;PF00271.26|Helicase_C;PF00270.24|DEAD	GO:0003676|nucleic acid binding;GO:0004386|helicase activity;GO:0005524|ATP binding	NA	NA	NA	NA	NA	NA	NA	Down	0.174132	No	Down	0.0708828	No	Down	0.717887	No
Ophcf2|00102	scaffold_01:848886-851172	Dead	Fungus	OK	51.173	46.7725	-0.129721	-0.296112	0.56535	0.688338	no	ATP-dependent RNA helicase (Hrh1)	PF00271|Helicase_C; PF04408|HA2; PF07717|OB_NTP_bind;	NA	NA	NA	GO:0003824|catalytic activity; GO:0016787|hydrolase activity; GO:0017111|nucleoside-triphosphatase activity; GO:0016818|hydrolase activity, acting on acid anhydrides, in phosphorus-containing anhydrides; GO:0003674|molecular_function; GO:0016462|pyrophosphatase activity; GO:0004386|helicase activity; GO:0016817|hydrolase activity, acting on acid anhydrides;	NA	NA	NA	Ophio5|398	0.756	1181.39	0	0.9934	58.3973	42.7232	38.6868	PF07717.11|OB_NTP_bind;PF04408.18|HA2;PF00271.26|Helicase_C;PF00270.24|DEAD	GO:0003676|nucleic acid binding;GO:0004386|helicase activity;GO:0005524|ATP binding	NA	NA	NA	NA	NA	NA	NA	Down	0.174132	No	Down	0.0708828	No	Down	0.717887	No
Ophcf2|00103	scaffold_01:851967-853341	Alive	Dead	OK	126.425	175.233	0.47099	1.01915	0.01995	0.0485416	yes	diacylglycerol O-acyltransferase 2B	PF03982|DAGAT;	NA	NA	NA	GO:0003824|catalytic activity; GO:0016740|transferase activity; GO:0003674|molecular_function; GO:0016747|transferase activity, transferring acyl groups other than amino-acyl groups; GO:0016746|transferase activity, transferring acyl groups;	NA	NA	1;	Ophio5|2177	0.664	506.908	2.97e-180	0.8028	0	0	0	PF03982.8|DAGAT	GO:0016747|transferase activity, transferring acyl groups other than amino-acyl groups	NA	NA	NA	1	NA	NA	NA	=	1	No	=	1	No	=	1	No
Ophcf2|00103	scaffold_01:851967-853341	Dead	Fungus	OK	175.233	50.4298	-1.79693	-3.90812	5e-05	0.000237974	yes	diacylglycerol O-acyltransferase 2B	PF03982|DAGAT;	NA	NA	NA	GO:0003824|catalytic activity; GO:0016740|transferase activity; GO:0003674|molecular_function; GO:0016747|transferase activity, transferring acyl groups other than amino-acyl groups; GO:0016746|transferase activity, transferring acyl groups;	NA	NA	1;	Ophio5|2177	0.664	506.908	2.97e-180	0.8028	0	0	0	PF03982.8|DAGAT	GO:0016747|transferase activity, transferring acyl groups other than amino-acyl groups	NA	NA	NA	1	NA	NA	NA	=	1	No	=	1	No	=	1	No
Ophcf2|00103	scaffold_01:851967-853341	Alive	Fungus	OK	126.425	50.4298	-1.32594	-2.92004	5e-05	0.000237974	yes	diacylglycerol O-acyltransferase 2B	PF03982|DAGAT;	NA	NA	NA	GO:0003824|catalytic activity; GO:0016740|transferase activity; GO:0003674|molecular_function; GO:0016747|transferase activity, transferring acyl groups other than amino-acyl groups; GO:0016746|transferase activity, transferring acyl groups;	NA	NA	1;	Ophio5|2177	0.664	506.908	2.97e-180	0.8028	0	0	0	PF03982.8|DAGAT	GO:0016747|transferase activity, transferring acyl groups other than amino-acyl groups	NA	NA	NA	1	NA	NA	NA	=	1	No	=	1	No	=	1	No
Ophcf2|00104	scaffold_01:853602-855026	Alive	Fungus	OK	93.7257	62.718	-0.579565	-1.30961	0.0118	0.0310549	yes	DNA lyase	PF01261|AP_endonuc_2;	NA	NA	NA	NA	NA	NA	NA	Ophio5|7489	0.779	684.485	0	0.9909	71.3317	70.7227	68.7752	PF01261.19|AP_endonuc_2	NA	NA	NA	NA	NA	NA	NA	NA	Down	0.977193	No	Down	0.899501	No	Down	0.924393	No
Ophcf2|00104	scaffold_01:853602-855026	Alive	Dead	OK	93.7257	83.8384	-0.160832	-0.36621	0.4175	0.55524	no	DNA lyase	PF01261|AP_endonuc_2;	NA	NA	NA	NA	NA	NA	NA	Ophio5|7489	0.779	684.485	0	0.9909	71.3317	70.7227	68.7752	PF01261.19|AP_endonuc_2	NA	NA	NA	NA	NA	NA	NA	NA	Down	0.977193	No	Down	0.899501	No	Down	0.924393	No
Ophcf2|00104	scaffold_01:853602-855026	Dead	Fungus	OK	83.8384	62.718	-0.418733	-0.955065	0.06555	0.12955	no	DNA lyase	PF01261|AP_endonuc_2;	NA	NA	NA	NA	NA	NA	NA	Ophio5|7489	0.779	684.485	0	0.9909	71.3317	70.7227	68.7752	PF01261.19|AP_endonuc_2	NA	NA	NA	NA	NA	NA	NA	NA	Down	0.977193	No	Down	0.899501	No	Down	0.924393	No
Ophcf2|00105	scaffold_01:855237-857499	Dead	Fungus	OK	34.3533	44.5023	0.373432	0.836019	0.10115	0.184617	no	Mitotic checkpoint serine/threonine protein kinase, Bub1	PF00069|Pkinase;	NA	NA	NA	GO:0035639|purine ribonucleoside triphosphate binding; GO:0006464|cellular protein modification process; GO:0097159|organic cyclic compound binding; GO:0003674|molecular_function; GO:0016772|transferase activity, transferring phosphorus-containing groups; GO:0032553|ribonucleotide binding; GO:0071704|organic substance metabolic process; GO:0009987|cellular process; GO:0016301|kinase activity; GO:…	NA	NA	NA	Ophio5|7488	0.736	1043.11	0	0.9809	32.1414	16.1769	59.1001	PF08311.7|Mad3_BUB1_I;PF00069.20|Pkinase	GO:0005524|ATP binding;GO:0004672|protein kinase activity;GO:0006468|protein phosphorylation	NA	NA	NA	NA	NA	NA	NA	Down	0.00584804	No	Up	0.0142756	No	Up	0.000285532	Yes
Ophcf2|00105	scaffold_01:855237-857499	Alive	Fungus	OK	15.7823	44.5023	1.49558	3.18705	5e-05	0.000237974	yes	Mitotic checkpoint serine/threonine protein kinase, Bub1	PF00069|Pkinase;	NA	NA	NA	GO:0035639|purine ribonucleoside triphosphate binding; GO:0006464|cellular protein modification process; GO:0097159|organic cyclic compound binding; GO:0003674|molecular_function; GO:0016772|transferase activity, transferring phosphorus-containing groups; GO:0032553|ribonucleotide binding; GO:0071704|organic substance metabolic process; GO:0009987|cellular process; GO:0016301|kinase activity; GO:…	NA	NA	NA	Ophio5|7488	0.736	1043.11	0	0.9809	32.1414	16.1769	59.1001	PF08311.7|Mad3_BUB1_I;PF00069.20|Pkinase	GO:0005524|ATP binding;GO:0004672|protein kinase activity;GO:0006468|protein phosphorylation	NA	NA	NA	NA	NA	NA	NA	Down	0.00584804	No	Up	0.0142756	No	Up	0.000285532	Yes
Ophcf2|00105	scaffold_01:855237-857499	Alive	Dead	OK	15.7823	34.3533	1.12214	2.33271	5e-05	0.000237974	yes	Mitotic checkpoint serine/threonine protein kinase, Bub1	PF00069|Pkinase;	NA	NA	NA	GO:0035639|purine ribonucleoside triphosphate binding; GO:0006464|cellular protein modification process; GO:0097159|organic cyclic compound binding; GO:0003674|molecular_function; GO:0016772|transferase activity, transferring phosphorus-containing groups; GO:0032553|ribonucleotide binding; GO:0071704|organic substance metabolic process; GO:0009987|cellular process; GO:0016301|kinase activity; GO:…	NA	NA	NA	Ophio5|7488	0.736	1043.11	0	0.9809	32.1414	16.1769	59.1001	PF08311.7|Mad3_BUB1_I;PF00069.20|Pkinase	GO:0005524|ATP binding;GO:0004672|protein kinase activity;GO:0006468|protein phosphorylation	NA	NA	NA	NA	NA	NA	NA	Down	0.00584804	No	Up	0.0142756	No	Up	0.000285532	Yes
Ophcf2|00106	scaffold_01:857707-858776	Alive	Fungus	OK	15.9199	88.2889	2.4714	4.53221	5e-05	0.000237974	yes	Mitotic checkpoint serine/threonine protein kinase, Bub1	PF08311|Mad3_BUB1_I;	NA	NA	NA	NA	NA	NA	NA	Ophio5|7488	0.792	517.694	7.69e-177	0.9939	32.1414	16.1769	59.1001	PF08311.7|Mad3_BUB1_I;PF00069.20|Pkinase	GO:0005524|ATP binding;GO:0004672|protein kinase activity;GO:0006468|protein phosphorylation	NA	NA	NA	NA	NA	NA	NA	Down	0.00584804	No	Up	0.0142756	No	Up	0.000285532	Yes
Ophcf2|00106	scaffold_01:857707-858776	Dead	Fungus	OK	43.6619	88.2889	1.01586	2.12722	5e-05	0.000237974	yes	Mitotic checkpoint serine/threonine protein kinase, Bub1	PF08311|Mad3_BUB1_I;	NA	NA	NA	NA	NA	NA	NA	Ophio5|7488	0.792	517.694	7.69e-177	0.9939	32.1414	16.1769	59.1001	PF08311.7|Mad3_BUB1_I;PF00069.20|Pkinase	GO:0005524|ATP binding;GO:0004672|protein kinase activity;GO:0006468|protein phosphorylation	NA	NA	NA	NA	NA	NA	NA	Down	0.00584804	No	Up	0.0142756	No	Up	0.000285532	Yes
Ophcf2|00106	scaffold_01:857707-858776	Alive	Dead	OK	15.9199	43.6619	1.45554	2.53889	5e-05	0.000237974	yes	Mitotic checkpoint serine/threonine protein kinase, Bub1	PF08311|Mad3_BUB1_I;	NA	NA	NA	NA	NA	NA	NA	Ophio5|7488	0.792	517.694	7.69e-177	0.9939	32.1414	16.1769	59.1001	PF08311.7|Mad3_BUB1_I;PF00069.20|Pkinase	GO:0005524|ATP binding;GO:0004672|protein kinase activity;GO:0006468|protein phosphorylation	NA	NA	NA	NA	NA	NA	NA	Down	0.00584804	No	Up	0.0142756	No	Up	0.000285532	Yes
Ophcf2|00107	scaffold_01:859570-861628	Alive	Dead	OK	241.885	178.928	-0.434946	-0.824874	0.0611	0.122507	no	Enolase	PF03952|Enolase_N; PF00113|Enolase_C;	NA	NA	NA	NA	NA	NA	NA	Ophio5|868	0.918	821.617	0	0.9202	900.406	559.733	705.317	PF00113.17|Enolase_C;PF00113.17|Enolase_C;PF03952.11|Enolase_N	GO:0006096|glycolytic process;GO:0004634|phosphopyruvate hydratase activity;GO:0000015|phosphopyruvate hydratase complex;GO:0000287|magnesium ion binding	NA	NA	NA	NA	NA	NA	NA	Down	0.131291	No	Down	0.477394	No	Up	0.479121	No
Ophcf2|00107	scaffold_01:859570-861628	Dead	Fungus	OK	178.928	1289.69	2.84957	5.09268	5e-05	0.000237974	yes	Enolase	PF03952|Enolase_N; PF00113|Enolase_C;	NA	NA	NA	NA	NA	NA	NA	Ophio5|868	0.918	821.617	0	0.9202	900.406	559.733	705.317	PF00113.17|Enolase_C;PF00113.17|Enolase_C;PF03952.11|Enolase_N	GO:0006096|glycolytic process;GO:0004634|phosphopyruvate hydratase activity;GO:0000015|phosphopyruvate hydratase complex;GO:0000287|magnesium ion binding	NA	NA	NA	NA	NA	NA	NA	Down	0.131291	No	Down	0.477394	No	Up	0.479121	No
Ophcf2|00107	scaffold_01:859570-861628	Alive	Fungus	OK	241.885	1289.69	2.41463	3.98907	5e-05	0.000237974	yes	Enolase	PF03952|Enolase_N; PF00113|Enolase_C;	NA	NA	NA	NA	NA	NA	NA	Ophio5|868	0.918	821.617	0	0.9202	900.406	559.733	705.317	PF00113.17|Enolase_C;PF00113.17|Enolase_C;PF03952.11|Enolase_N	GO:0006096|glycolytic process;GO:0004634|phosphopyruvate hydratase activity;GO:0000015|phosphopyruvate hydratase complex;GO:0000287|magnesium ion binding	NA	NA	NA	NA	NA	NA	NA	Down	0.131291	No	Down	0.477394	No	Up	0.479121	No
Ophcf2|00108	scaffold_01:862270-863140	Alive	Dead	OK	102.584	100.056	-0.0360036	-0.0792897	0.8598	0.909826	no	Pre-rRNA-processing protein PNO1	PF17903|KH_8;	NA	NA	NA	NA	NA	NA	NA	Ophio5|3835	0.866	445.277	3.57e-161	0.9961	157.499	145.703	201.365	PF00013.24|KH_1	GO:0003723|RNA binding	NA	NA	NA	NA	NA	NA	NA	Down	0.77437	No	Up	0.306397	No	Up	0.160513	No
Ophcf2|00108	scaffold_01:862270-863140	Alive	Fungus	OK	102.584	90.8507	-0.175237	-0.384602	0.44645	0.582643	no	Pre-rRNA-processing protein PNO1	PF17903|KH_8;	NA	NA	NA	NA	NA	NA	NA	Ophio5|3835	0.866	445.277	3.57e-161	0.9961	157.499	145.703	201.365	PF00013.24|KH_1	GO:0003723|RNA binding	NA	NA	NA	NA	NA	NA	NA	Down	0.77437	No	Up	0.306397	No	Up	0.160513	No
Ophcf2|00108	scaffold_01:862270-863140	Dead	Fungus	OK	100.056	90.8507	-0.139234	-0.305008	0.5454	0.671784	no	Pre-rRNA-processing protein PNO1	PF17903|KH_8;	NA	NA	NA	NA	NA	NA	NA	Ophio5|3835	0.866	445.277	3.57e-161	0.9961	157.499	145.703	201.365	PF00013.24|KH_1	GO:0003723|RNA binding	NA	NA	NA	NA	NA	NA	NA	Down	0.77437	No	Up	0.306397	No	Up	0.160513	No
Ophcf2|00109	scaffold_01:863707-865685	Dead	Fungus	OK	46.1087	40.8029	-0.176367	-0.400432	0.43095	0.567912	no	Mitochondrial distribution and morphology protein	PF08118|MDM31_MDM32;	NA	NA	NA	GO:0005575|cellular_component; GO:0051641|cellular localization; GO:0005743|mitochondrial inner membrane; GO:0006996|organelle organization; GO:0019866|organelle inner membrane; GO:0007005|mitochondrion organization; GO:0016020|membrane; GO:0009987|cellular process; GO:0044424|intracellular part; GO:0031090|organelle membrane; GO:0016043|cellular component organization; GO:0044464|cell part; GO:0…	NA	NA	2;	Ophio5|3834	0.817	1036.56	0	0.9984	72.2538	51.4768	51.3569	PF08118.6|MDM31_MDM32	GO:0007005|mitochondrion organization;GO:0005743|mitochondrial inner membrane	NA	NA	NA	2	NA	NA	NA	Down	0.147833	No	Down	0.142684	No	Down	0.994094	No
Ophcf2|00109	scaffold_01:863707-865685	Alive	Fungus	OK	39.6483	40.8029	0.0414129	0.0934359	0.8548	0.906402	no	Mitochondrial distribution and morphology protein	PF08118|MDM31_MDM32;	NA	NA	NA	GO:0005575|cellular_component; GO:0051641|cellular localization; GO:0005743|mitochondrial inner membrane; GO:0006996|organelle organization; GO:0019866|organelle inner membrane; GO:0007005|mitochondrion organization; GO:0016020|membrane; GO:0009987|cellular process; GO:0044424|intracellular part; GO:0031090|organelle membrane; GO:0016043|cellular component organization; GO:0044464|cell part; GO:0…	NA	NA	2;	Ophio5|3834	0.817	1036.56	0	0.9984	72.2538	51.4768	51.3569	PF08118.6|MDM31_MDM32	GO:0007005|mitochondrion organization;GO:0005743|mitochondrial inner membrane	NA	NA	NA	2	NA	NA	NA	Down	0.147833	No	Down	0.142684	No	Down	0.994094	No
Ophcf2|00109	scaffold_01:863707-865685	Alive	Dead	OK	39.6483	46.1087	0.21778	0.494578	0.2642	0.392047	no	Mitochondrial distribution and morphology protein	PF08118|MDM31_MDM32;	NA	NA	NA	GO:0005575|cellular_component; GO:0051641|cellular localization; GO:0005743|mitochondrial inner membrane; GO:0006996|organelle organization; GO:0019866|organelle inner membrane; GO:0007005|mitochondrion organization; GO:0016020|membrane; GO:0009987|cellular process; GO:0044424|intracellular part; GO:0031090|organelle membrane; GO:0016043|cellular component organization; GO:0044464|cell part; GO:0…	NA	NA	2;	Ophio5|3834	0.817	1036.56	0	0.9984	72.2538	51.4768	51.3569	PF08118.6|MDM31_MDM32	GO:0007005|mitochondrion organization;GO:0005743|mitochondrial inner membrane	NA	NA	NA	2	NA	NA	NA	Down	0.147833	No	Down	0.142684	No	Down	0.994094	No
Ophcf2|00110	scaffold_01:866528-867583	Dead	Fungus	OK	159.048	365.844	1.20177	2.63205	5e-05	0.000237974	yes	Translation initiation factor eIF3 subunit	PF08597|eIF3_subunit;	NA	NA	NA	GO:0003743|translation initiation factor activity; GO:0045182|translation regulator activity; GO:0005488|binding; GO:0005575|cellular_component; GO:0097159|organic cyclic compound binding; GO:0044424|intracellular part; GO:0003674|molecular_function; GO:0005852|eukaryotic translation initiation factor 3 complex; GO:0003723|RNA binding; GO:0044444|cytoplasmic part; GO:0044464|cell part; GO:0090079…	NA	NA	NA	Ophio5|3833	0.868	347.051	1.4e-121	0.9567	326.146	308.655	290.269	PF08597.5|eIF3_subunit	GO:0005852|eukaryotic translation initiation factor 3 complex;GO:0005737|cytoplasm;GO:0003743|translation initiation factor activity	NA	NA	NA	NA	NA	NA	NA	Down	0.857152	No	Down	0.673051	No	Down	0.837638	No
Ophcf2|00110	scaffold_01:866528-867583	Alive	Dead	OK	161.242	159.048	-0.0197692	-0.0451103	0.9196	0.948898	no	Translation initiation factor eIF3 subunit	PF08597|eIF3_subunit;	NA	NA	NA	GO:0003743|translation initiation factor activity; GO:0045182|translation regulator activity; GO:0005488|binding; GO:0005575|cellular_component; GO:0097159|organic cyclic compound binding; GO:0044424|intracellular part; GO:0003674|molecular_function; GO:0005852|eukaryotic translation initiation factor 3 complex; GO:0003723|RNA binding; GO:0044444|cytoplasmic part; GO:0044464|cell part; GO:0090079…	NA	NA	NA	Ophio5|3833	0.868	347.051	1.4e-121	0.9567	326.146	308.655	290.269	PF08597.5|eIF3_subunit	GO:0005852|eukaryotic translation initiation factor 3 complex;GO:0005737|cytoplasm;GO:0003743|translation initiation factor activity	NA	NA	NA	NA	NA	NA	NA	Down	0.857152	No	Down	0.673051	No	Down	0.837638	No
Ophcf2|00110	scaffold_01:866528-867583	Alive	Fungus	OK	161.242	365.844	1.182	2.56956	5e-05	0.000237974	yes	Translation initiation factor eIF3 subunit	PF08597|eIF3_subunit;	NA	NA	NA	GO:0003743|translation initiation factor activity; GO:0045182|translation regulator activity; GO:0005488|binding; GO:0005575|cellular_component; GO:0097159|organic cyclic compound binding; GO:0044424|intracellular part; GO:0003674|molecular_function; GO:0005852|eukaryotic translation initiation factor 3 complex; GO:0003723|RNA binding; GO:0044444|cytoplasmic part; GO:0044464|cell part; GO:0090079…	NA	NA	NA	Ophio5|3833	0.868	347.051	1.4e-121	0.9567	326.146	308.655	290.269	PF08597.5|eIF3_subunit	GO:0005852|eukaryotic translation initiation factor 3 complex;GO:0005737|cytoplasm;GO:0003743|translation initiation factor activity	NA	NA	NA	NA	NA	NA	NA	Down	0.857152	No	Down	0.673051	No	Down	0.837638	No
Ophcf2|00111	scaffold_01:868536-869656	Dead	Fungus	OK	28.1317	969.661	5.10721	9.11219	5e-05	0.000237974	yes	Alternative oxidase	PF01786|AOX;	NA	NA	NA	GO:0003824|catalytic activity; GO:0009916|alternative oxidase activity; GO:0055114|oxidation-reduction process; GO:0016491|oxidoreductase activity; GO:0003674|molecular_function; GO:0008150|biological_process; GO:0016682|oxidoreductase activity, acting on diphenols and related substances as donors, oxygen as acceptor; GO:0008152|metabolic process; GO:0016679|oxidoreductase activity, acting on dip…	NA	NA	2;	Ophio5|3832	0.899	641.728	0	0.997	206.537	62.7204	42.4743	PF01786.12|AOX	GO:0009916|alternative oxidase activity;GO:0055114|oxidation-reduction process	NA	NA	NA	2	NA	NA	NA	Down	0.000285532	Yes	Down	0.000285532	Yes	Down	0.175532	No
Ophcf2|00111	scaffold_01:868536-869656	Alive	Dead	OK	41.3391	28.1317	-0.55531	-1.03471	0.01955	0.0477353	yes	Alternative oxidase	PF01786|AOX;	NA	NA	NA	GO:0003824|catalytic activity; GO:0009916|alternative oxidase activity; GO:0055114|oxidation-reduction process; GO:0016491|oxidoreductase activity; GO:0003674|molecular_function; GO:0008150|biological_process; GO:0016682|oxidoreductase activity, acting on diphenols and related substances as donors, oxygen as acceptor; GO:0008152|metabolic process; GO:0016679|oxidoreductase activity, acting on dip…	NA	NA	2;	Ophio5|3832	0.899	641.728	0	0.997	206.537	62.7204	42.4743	PF01786.12|AOX	GO:0009916|alternative oxidase activity;GO:0055114|oxidation-reduction process	NA	NA	NA	2	NA	NA	NA	Down	0.000285532	Yes	Down	0.000285532	Yes	Down	0.175532	No
Ophcf2|00111	scaffold_01:868536-869656	Alive	Fungus	OK	41.3391	969.661	4.5519	8.2139	5e-05	0.000237974	yes	Alternative oxidase	PF01786|AOX;	NA	NA	NA	GO:0003824|catalytic activity; GO:0009916|alternative oxidase activity; GO:0055114|oxidation-reduction process; GO:0016491|oxidoreductase activity; GO:0003674|molecular_function; GO:0008150|biological_process; GO:0016682|oxidoreductase activity, acting on diphenols and related substances as donors, oxygen as acceptor; GO:0008152|metabolic process; GO:0016679|oxidoreductase activity, acting on dip…	NA	NA	2;	Ophio5|3832	0.899	641.728	0	0.997	206.537	62.7204	42.4743	PF01786.12|AOX	GO:0009916|alternative oxidase activity;GO:0055114|oxidation-reduction process	NA	NA	NA	2	NA	NA	NA	Down	0.000285532	Yes	Down	0.000285532	Yes	Down	0.175532	No
Ophcf2|00112	scaffold_01:872022-874200	Dead	Fungus	OK	109.238	55.2439	-0.983587	-2.17178	5e-05	0.000237974	yes	oocyte zinc finger protein XlCOF20	PF00096|zf-C2H2; PF12874|zf-met; PF13912|zf-C2H2_6; PF13894|zf-C2H2_4;	NA	NA	C2H2 zinc finger;	GO:0005488|binding; GO:0097159|organic cyclic compound binding; GO:0003674|molecular_function; GO:0003676|nucleic acid binding; GO:1901363|heterocyclic compound binding;	NA	NA	NA	Ophio5|3831	0.761	994.571	0	0.9956	71.1618	53.4543	46.102	NA	NA	NA	NA	NA	NA	NA	NA	NA	Down	0.221634	No	Down	0.0512681	No	Down	0.563699	No
Ophcf2|00112	scaffold_01:872022-874200	Alive	Fungus	OK	100.846	55.2439	-0.868263	-1.87953	0.0004	0.00158983	yes	oocyte zinc finger protein XlCOF20	PF00096|zf-C2H2; PF12874|zf-met; PF13912|zf-C2H2_6; PF13894|zf-C2H2_4;	NA	NA	C2H2 zinc finger;	GO:0005488|binding; GO:0097159|organic cyclic compound binding; GO:0003674|molecular_function; GO:0003676|nucleic acid binding; GO:1901363|heterocyclic compound binding;	NA	NA	NA	Ophio5|3831	0.761	994.571	0	0.9956	71.1618	53.4543	46.102	NA	NA	NA	NA	NA	NA	NA	NA	NA	Down	0.221634	No	Down	0.0512681	No	Down	0.563699	No
Ophcf2|00112	scaffold_01:872022-874200	Alive	Dead	OK	100.846	109.238	0.115324	0.240263	0.58595	0.706362	no	oocyte zinc finger protein XlCOF20	PF00096|zf-C2H2; PF12874|zf-met; PF13912|zf-C2H2_6; PF13894|zf-C2H2_4;	NA	NA	C2H2 zinc finger;	GO:0005488|binding; GO:0097159|organic cyclic compound binding; GO:0003674|molecular_function; GO:0003676|nucleic acid binding; GO:1901363|heterocyclic compound binding;	NA	NA	NA	Ophio5|3831	0.761	994.571	0	0.9956	71.1618	53.4543	46.102	NA	NA	NA	NA	NA	NA	NA	NA	NA	Down	0.221634	No	Down	0.0512681	No	Down	0.563699	No
Ophcf2|00113	scaffold_01:876363-880301	Alive	Fungus	OK	110.907	77.9989	-0.507826	-0.974966	0.05705	0.116135	no	predicted protein	NA	NA	NA	NA	NA	NA	NA	NA	Ophio5|3829	0.641	596.275	0	0.5214	127.129	45.176	32.9736	NA	NA	NA	NA	NA	NA	NA	NA	NA	Down	0.000285532	Yes	Down	0.000285532	Yes	Down	0.230714	No
Ophcf2|00113	scaffold_01:876363-880301	Alive	Dead	OK	110.907	124.741	0.169582	0.314495	0.47165	0.605125	no	predicted protein	NA	NA	NA	NA	NA	NA	NA	NA	Ophio5|3829	0.641	596.275	0	0.5214	127.129	45.176	32.9736	NA	NA	NA	NA	NA	NA	NA	NA	NA	Down	0.000285532	Yes	Down	0.000285532	Yes	Down	0.230714	No
Ophcf2|00113	scaffold_01:876363-880301	Dead	Fungus	OK	124.741	77.9989	-0.677408	-1.3022	0.0116	0.0306445	yes	predicted protein	NA	NA	NA	NA	NA	NA	NA	NA	Ophio5|3829	0.641	596.275	0	0.5214	127.129	45.176	32.9736	NA	NA	NA	NA	NA	NA	NA	NA	NA	Down	0.000285532	Yes	Down	0.000285532	Yes	Down	0.230714	No
Ophcf2|00114	scaffold_01:880837-883369	Alive	Dead	OK	64.0444	68.4551	0.0960852	0.210732	0.6366	0.746925	no	m protein repeat protein	PF12329|TMF_DNA_bd; PF12325|TMF_TATA_bd;	NA	NA	NA	NA	NA	NA	NA	Ophio5|3828	0.761	1077.39	0	0.9987	57.0803	43.9518	41.5404	PF12325.3|TMF_TATA_bd;PF12329.3|TMF_DNA_bd	NA	NA	NA	NA	NA	NA	NA	NA	Down	0.264315	No	Down	0.174132	No	Down	0.838212	No
Ophcf2|00114	scaffold_01:880837-883369	Alive	Fungus	OK	64.0444	46.9872	-0.446803	-0.99658	0.0515	0.106792	no	m protein repeat protein	PF12329|TMF_DNA_bd; PF12325|TMF_TATA_bd;	NA	NA	NA	NA	NA	NA	NA	Ophio5|3828	0.761	1077.39	0	0.9987	57.0803	43.9518	41.5404	PF12325.3|TMF_TATA_bd;PF12329.3|TMF_DNA_bd	NA	NA	NA	NA	NA	NA	NA	NA	Down	0.264315	No	Down	0.174132	No	Down	0.838212	No
Ophcf2|00114	scaffold_01:880837-883369	Dead	Fungus	OK	68.4551	46.9872	-0.542888	-1.23141	0.0177	0.043909	yes	m protein repeat protein	PF12329|TMF_DNA_bd; PF12325|TMF_TATA_bd;	NA	NA	NA	NA	NA	NA	NA	Ophio5|3828	0.761	1077.39	0	0.9987	57.0803	43.9518	41.5404	PF12325.3|TMF_TATA_bd;PF12329.3|TMF_DNA_bd	NA	NA	NA	NA	NA	NA	NA	NA	Down	0.264315	No	Down	0.174132	No	Down	0.838212	No
Ophcf2|00115	scaffold_01:883461-884683	Alive	Fungus	OK	65.6306	171.132	1.38267	2.89778	5e-05	0.000237974	yes	ankyrin repeat domain containing protein	PF12796|Ank_2; PF13637|Ank_4; PF13606|Ank_3; PF13857|Ank_5; PF00023|Ank;	NA	NA	NA	GO:0003674|molecular_function; GO:0005488|binding; GO:0005515|protein binding;	NA	NA	NA	Ophio5|3827	0.855	418.313	8.18e-151	0.9959	89.803	80.3276	69.6711	PF13857.1|Ank_5;PF13857.1|Ank_5;PF13857.1|Ank_5;PF12796.2|Ank_2;PF12796.2|Ank_2;PF12796.2|Ank_2;PF13637.1|Ank_4;PF13637.1|Ank_4;PF13637.1|Ank_4;PF00023.25|Ank;PF00023.25|Ank;PF00023.25|Ank;PF00023.25|Ank;PF00023.25|Ank;PF13606.1|Ank_3	GO:0005515|protein binding	NA	NA	NA	NA	NA	NA	NA	Down	0.693622	No	Down	0.309841	No	Down	0.604182	No
Ophcf2|00115	scaffold_01:883461-884683	Alive	Dead	OK	65.6306	60.4463	-0.118715	-0.233451	0.6015	0.719	no	ankyrin repeat domain containing protein	PF12796|Ank_2; PF13637|Ank_4; PF13606|Ank_3; PF13857|Ank_5; PF00023|Ank;	NA	NA	NA	GO:0003674|molecular_function; GO:0005488|binding; GO:0005515|protein binding;	NA	NA	NA	Ophio5|3827	0.855	418.313	8.18e-151	0.9959	89.803	80.3276	69.6711	PF13857.1|Ank_5;PF13857.1|Ank_5;PF13857.1|Ank_5;PF12796.2|Ank_2;PF12796.2|Ank_2;PF12796.2|Ank_2;PF13637.1|Ank_4;PF13637.1|Ank_4;PF13637.1|Ank_4;PF00023.25|Ank;PF00023.25|Ank;PF00023.25|Ank;PF00023.25|Ank;PF00023.25|Ank;PF13606.1|Ank_3	GO:0005515|protein binding	NA	NA	NA	NA	NA	NA	NA	Down	0.693622	No	Down	0.309841	No	Down	0.604182	No
Ophcf2|00115	scaffold_01:883461-884683	Dead	Fungus	OK	60.4463	171.132	1.50138	3.20683	5e-05	0.000237974	yes	ankyrin repeat domain containing protein	PF12796|Ank_2; PF13637|Ank_4; PF13606|Ank_3; PF13857|Ank_5; PF00023|Ank;	NA	NA	NA	GO:0003674|molecular_function; GO:0005488|binding; GO:0005515|protein binding;	NA	NA	NA	Ophio5|3827	0.855	418.313	8.18e-151	0.9959	89.803	80.3276	69.6711	PF13857.1|Ank_5;PF13857.1|Ank_5;PF13857.1|Ank_5;PF12796.2|Ank_2;PF12796.2|Ank_2;PF12796.2|Ank_2;PF13637.1|Ank_4;PF13637.1|Ank_4;PF13637.1|Ank_4;PF00023.25|Ank;PF00023.25|Ank;PF00023.25|Ank;PF00023.25|Ank;PF00023.25|Ank;PF13606.1|Ank_3	GO:0005515|protein binding	NA	NA	NA	NA	NA	NA	NA	Down	0.693622	No	Down	0.309841	No	Down	0.604182	No
Ophcf2|00116	scaffold_01:885149-886635	Alive	Fungus	OK	58.4815	62.9235	0.105619	0.23973	0.6412	0.750159	no	pre-mRNA splicing factor prp46	PF00400|WD40;	NA	NA	NA	GO:0003674|molecular_function; GO:0005488|binding; GO:0005515|protein binding;	NA	NA	NA	Ophio5|3826	0.859	813.913	0	0.9978	66.6884	57.1529	54.3167	PF00400.27|WD40;PF00400.27|WD40;PF00400.27|WD40;PF00400.27|WD40;PF00400.27|WD40;PF00400.27|WD40	GO:0005515|protein binding	NA	NA	NA	NA	NA	NA	NA	Down	0.520635	No	Down	0.381164	No	Down	0.853019	No
Ophcf2|00116	scaffold_01:885149-886635	Dead	Fungus	OK	61.6543	62.9235	0.0293992	0.0667171	0.8969	0.934054	no	pre-mRNA splicing factor prp46	PF00400|WD40;	NA	NA	NA	GO:0003674|molecular_function; GO:0005488|binding; GO:0005515|protein binding;	NA	NA	NA	Ophio5|3826	0.859	813.913	0	0.9978	66.6884	57.1529	54.3167	PF00400.27|WD40;PF00400.27|WD40;PF00400.27|WD40;PF00400.27|WD40;PF00400.27|WD40;PF00400.27|WD40	GO:0005515|protein binding	NA	NA	NA	NA	NA	NA	NA	Down	0.520635	No	Down	0.381164	No	Down	0.853019	No
Ophcf2|00116	scaffold_01:885149-886635	Alive	Dead	OK	58.4815	61.6543	0.07622	0.17216	0.6961	0.794564	no	pre-mRNA splicing factor prp46	PF00400|WD40;	NA	NA	NA	GO:0003674|molecular_function; GO:0005488|binding; GO:0005515|protein binding;	NA	NA	NA	Ophio5|3826	0.859	813.913	0	0.9978	66.6884	57.1529	54.3167	PF00400.27|WD40;PF00400.27|WD40;PF00400.27|WD40;PF00400.27|WD40;PF00400.27|WD40;PF00400.27|WD40	GO:0005515|protein binding	NA	NA	NA	NA	NA	NA	NA	Down	0.520635	No	Down	0.381164	No	Down	0.853019	No
Ophcf2|00117	scaffold_01:886712-889126	Dead	Fungus	OK	50.1315	31.1721	-0.68546	-1.49102	0.00385	0.0117494	yes	Origin recognition complex subunit 1	PF01426|BAH; PF13191|AAA_16; PF17872|AAA_lid_10; PF00004|AAA; PF13401|AAA_22;	NA	NA	NA	GO:0035639|purine ribonucleoside triphosphate binding; GO:0005488|binding; GO:1901265|nucleoside phosphate binding; GO:0097159|organic cyclic compound binding; GO:0017076|purine nucleotide binding; GO:0003674|molecular_function; GO:0003682|chromatin binding; GO:0032555|purine ribonucleotide binding; GO:0036094|small molecule binding; GO:0005524|ATP binding; GO:0043167|ion binding; GO:0032553|ribo…	NA	NA	NA	Ophio5|3825	0.891	1335.09	0	0.9973	59.633	67.6502	34.158	PF00004.24|AAA;PF13191.1|AAA_16;PF01426.13|BAH;PF13401.1|AAA_22	GO:0005524|ATP binding;GO:0003682|chromatin binding	NA	NA	NA	NA	NA	NA	NA	Up	0.645307	No	Down	0.00965978	No	Down	0.00223648	No
Ophcf2|00117	scaffold_01:886712-889126	Alive	Fungus	OK	102.382	31.1721	-1.71563	-3.54572	5e-05	0.000237974	yes	Origin recognition complex subunit 1	PF01426|BAH; PF13191|AAA_16; PF17872|AAA_lid_10; PF00004|AAA; PF13401|AAA_22;	NA	NA	NA	GO:0035639|purine ribonucleoside triphosphate binding; GO:0005488|binding; GO:1901265|nucleoside phosphate binding; GO:0097159|organic cyclic compound binding; GO:0017076|purine nucleotide binding; GO:0003674|molecular_function; GO:0003682|chromatin binding; GO:0032555|purine ribonucleotide binding; GO:0036094|small molecule binding; GO:0005524|ATP binding; GO:0043167|ion binding; GO:0032553|ribo…	NA	NA	NA	Ophio5|3825	0.891	1335.09	0	0.9973	59.633	67.6502	34.158	PF00004.24|AAA;PF13191.1|AAA_16;PF01426.13|BAH;PF13401.1|AAA_22	GO:0005524|ATP binding;GO:0003682|chromatin binding	NA	NA	NA	NA	NA	NA	NA	Up	0.645307	No	Down	0.00965978	No	Down	0.00223648	No
Ophcf2|00117	scaffold_01:886712-889126	Alive	Dead	OK	102.382	50.1315	-1.03017	-2.0792	5e-05	0.000237974	yes	Origin recognition complex subunit 1	PF01426|BAH; PF13191|AAA_16; PF17872|AAA_lid_10; PF00004|AAA; PF13401|AAA_22;	NA	NA	NA	GO:0035639|purine ribonucleoside triphosphate binding; GO:0005488|binding; GO:1901265|nucleoside phosphate binding; GO:0097159|organic cyclic compound binding; GO:0017076|purine nucleotide binding; GO:0003674|molecular_function; GO:0003682|chromatin binding; GO:0032555|purine ribonucleotide binding; GO:0036094|small molecule binding; GO:0005524|ATP binding; GO:0043167|ion binding; GO:0032553|ribo…	NA	NA	NA	Ophio5|3825	0.891	1335.09	0	0.9973	59.633	67.6502	34.158	PF00004.24|AAA;PF13191.1|AAA_16;PF01426.13|BAH;PF13401.1|AAA_22	GO:0005524|ATP binding;GO:0003682|chromatin binding	NA	NA	NA	NA	NA	NA	NA	Up	0.645307	No	Down	0.00965978	No	Down	0.00223648	No
Ophcf2|00118	scaffold_01:889872-891432	Alive	Dead	OK	25.1956	24.8924	-0.0174679	-0.0342788	0.94055	0.962504	no	hypothetical protein CDD80_2287	NA	NA	NA	NA	NA	NA	NA	NA	Ophio5|3824	0.698	657.136	0	0.9956	127.139	71.823	62.8367	NA	NA	NA	NA	NA	NA	NA	NA	NA	Down	0.0186936	No	Down	0.00143681	Yes	Down	0.635535	No
Ophcf2|00118	scaffold_01:889872-891432	Dead	Fungus	OK	24.8924	30.3859	0.287695	0.571428	0.27315	0.401708	no	hypothetical protein CDD80_2287	NA	NA	NA	NA	NA	NA	NA	NA	Ophio5|3824	0.698	657.136	0	0.9956	127.139	71.823	62.8367	NA	NA	NA	NA	NA	NA	NA	NA	NA	Down	0.0186936	No	Down	0.00143681	Yes	Down	0.635535	No
Ophcf2|00118	scaffold_01:889872-891432	Alive	Fungus	OK	25.1956	30.3859	0.270227	0.537425	0.2987	0.430535	no	hypothetical protein CDD80_2287	NA	NA	NA	NA	NA	NA	NA	NA	Ophio5|3824	0.698	657.136	0	0.9956	127.139	71.823	62.8367	NA	NA	NA	NA	NA	NA	NA	NA	NA	Down	0.0186936	No	Down	0.00143681	Yes	Down	0.635535	No
Ophcf2|00119	scaffold_01:891637-892347	Alive	Fungus	OK	48.9715	95.7179	0.966845	1.68349	0.0013	0.00453151	yes	probable prefoldin subunit 5	PF02996|Prefoldin;	NA	NA	NA	NA	NA	NA	NA	Ophio5|3823	0.833	239.965	3.32e-83	0.9605	51.3727	87.7456	124.637	PF02996.12|Prefoldin	GO:0016272|prefoldin complex;GO:0051082|unfolded protein binding;GO:0006457|protein folding	NA	NA	NA	NA	NA	NA	NA	Up	0.0583926	No	Up	0.000997454	Yes	Up	0.195788	No
Ophcf2|00119	scaffold_01:891637-892347	Dead	Fungus	OK	56.251	95.7179	0.766911	1.35363	0.0071	0.0200743	yes	probable prefoldin subunit 5	PF02996|Prefoldin;	NA	NA	NA	NA	NA	NA	NA	Ophio5|3823	0.833	239.965	3.32e-83	0.9605	51.3727	87.7456	124.637	PF02996.12|Prefoldin	GO:0016272|prefoldin complex;GO:0051082|unfolded protein binding;GO:0006457|protein folding	NA	NA	NA	NA	NA	NA	NA	Up	0.0583926	No	Up	0.000997454	Yes	Up	0.195788	No
Ophcf2|00119	scaffold_01:891637-892347	Alive	Dead	OK	48.9715	56.251	0.199935	0.329678	0.4555	0.590879	no	probable prefoldin subunit 5	PF02996|Prefoldin;	NA	NA	NA	NA	NA	NA	NA	Ophio5|3823	0.833	239.965	3.32e-83	0.9605	51.3727	87.7456	124.637	PF02996.12|Prefoldin	GO:0016272|prefoldin complex;GO:0051082|unfolded protein binding;GO:0006457|protein folding	NA	NA	NA	NA	NA	NA	NA	Up	0.0583926	No	Up	0.000997454	Yes	Up	0.195788	No
Ophcf2|00120	scaffold_01:893295-894699	Alive	Fungus	OK	85.0387	86.7386	0.0285555	0.064489	0.90055	0.93677	no	actin filament organization protein App1-like protein	PF09949|DUF2183;	NA	NA	NA	NA	NA	NA	NA	Ophio5|3822	0.885	672.544	0	0.9139	29.5345	21.7083	21.717	PF09949.4|DUF2183	NA	NA	NA	NA	NA	NA	NA	NA	Down	0.25518	No	Down	0.255667	No	Up	0.997651	No
Ophcf2|00120	scaffold_01:893295-894699	Dead	Fungus	OK	76.5751	86.7386	0.1798	0.409315	0.42285	0.560526	no	actin filament organization protein App1-like protein	PF09949|DUF2183;	NA	NA	NA	NA	NA	NA	NA	Ophio5|3822	0.885	672.544	0	0.9139	29.5345	21.7083	21.717	PF09949.4|DUF2183	NA	NA	NA	NA	NA	NA	NA	NA	Down	0.25518	No	Down	0.255667	No	Up	0.997651	No
Ophcf2|00120	scaffold_01:893295-894699	Alive	Dead	OK	85.0387	76.5751	-0.151245	-0.337438	0.4524	0.587954	no	actin filament organization protein App1-like protein	PF09949|DUF2183;	NA	NA	NA	NA	NA	NA	NA	Ophio5|3822	0.885	672.544	0	0.9139	29.5345	21.7083	21.717	PF09949.4|DUF2183	NA	NA	NA	NA	NA	NA	NA	NA	Down	0.25518	No	Down	0.255667	No	Up	0.997651	No
Ophcf2|00121	scaffold_01:895011-896739	Alive	Fungus	OK	64.838	72.763	0.166366	0.381539	0.4522	0.587729	no	prolyl-tRNA synthetase	PF00587|tRNA-synt_2b; PF03129|HGTP_anticodon;	NA	NA	NA	GO:0035639|purine ribonucleoside triphosphate binding; GO:0016874|ligase activity; GO:0097159|organic cyclic compound binding; GO:0043436|oxoacid metabolic process; GO:0003674|molecular_function; GO:0019752|carboxylic acid metabolic process; GO:0032553|ribonucleotide binding; GO:0071704|organic substance metabolic process; GO:0009987|cellular process; GO:0008144|drug binding; GO:0005488|binding; …	NA	NA	NA	Ophio5|3821	0.739	420.239	1.52e-142	0.5702	105.308	44.151	71.123	PF00587.20|tRNA-synt_2b;PF03129.15|HGTP_anticodon	GO:0004812|aminoacyl-tRNA ligase activity;GO:0005524|ATP binding;GO:0000166|nucleotide binding;GO:0006418|tRNA aminoacylation for protein translation	NA	NA	NA	NA	NA	NA	NA	Down	0.000285532	Yes	Down	0.0817721	No	Up	0.0348085	No
Ophcf2|00121	scaffold_01:895011-896739	Dead	Fungus	OK	70.0793	72.763	0.0542184	0.124646	0.80675	0.874814	no	prolyl-tRNA synthetase	PF00587|tRNA-synt_2b; PF03129|HGTP_anticodon;	NA	NA	NA	GO:0035639|purine ribonucleoside triphosphate binding; GO:0016874|ligase activity; GO:0097159|organic cyclic compound binding; GO:0043436|oxoacid metabolic process; GO:0003674|molecular_function; GO:0019752|carboxylic acid metabolic process; GO:0032553|ribonucleotide binding; GO:0071704|organic substance metabolic process; GO:0009987|cellular process; GO:0008144|drug binding; GO:0005488|binding; …	NA	NA	NA	Ophio5|3821	0.739	420.239	1.52e-142	0.5702	105.308	44.151	71.123	PF00587.20|tRNA-synt_2b;PF03129.15|HGTP_anticodon	GO:0004812|aminoacyl-tRNA ligase activity;GO:0005524|ATP binding;GO:0000166|nucleotide binding;GO:0006418|tRNA aminoacylation for protein translation	NA	NA	NA	NA	NA	NA	NA	Down	0.000285532	Yes	Down	0.0817721	No	Up	0.0348085	No
Ophcf2|00121	scaffold_01:895011-896739	Alive	Dead	OK	64.838	70.0793	0.112147	0.256835	0.55095	0.676303	no	prolyl-tRNA synthetase	PF00587|tRNA-synt_2b; PF03129|HGTP_anticodon;	NA	NA	NA	GO:0035639|purine ribonucleoside triphosphate binding; GO:0016874|ligase activity; GO:0097159|organic cyclic compound binding; GO:0043436|oxoacid metabolic process; GO:0003674|molecular_function; GO:0019752|carboxylic acid metabolic process; GO:0032553|ribonucleotide binding; GO:0071704|organic substance metabolic process; GO:0009987|cellular process; GO:0008144|drug binding; GO:0005488|binding; …	NA	NA	NA	Ophio5|3821	0.739	420.239	1.52e-142	0.5702	105.308	44.151	71.123	PF00587.20|tRNA-synt_2b;PF03129.15|HGTP_anticodon	GO:0004812|aminoacyl-tRNA ligase activity;GO:0005524|ATP binding;GO:0000166|nucleotide binding;GO:0006418|tRNA aminoacylation for protein translation	NA	NA	NA	NA	NA	NA	NA	Down	0.000285532	Yes	Down	0.0817721	No	Up	0.0348085	No
Ophcf2|00122	scaffold_01:897041-900138	Alive	Dead	OK	30.3152	29.4484	-0.0418492	-0.0940731	0.83365	0.893472	no	CCAAT-box-binding transcription factor	PF03914|CBF;	NA	NA	NA	NA	NA	NA	NA	Ophio5|3819	0.842	1145.18	0	0.7128	46.6261	34.3784	43.1824	PF03914.12|CBF;PF03061.17|4HBT	NA	NA	NA	NA	NA	NA	NA	NA	Down	0.200754	No	Down	0.778627	No	Up	0.336173	No
Ophcf2|00122	scaffold_01:897041-900138	Alive	Fungus	OK	30.3152	30.9652	0.0306079	0.0689511	0.89275	0.931306	no	CCAAT-box-binding transcription factor	PF03914|CBF;	NA	NA	NA	NA	NA	NA	NA	Ophio5|3819	0.842	1145.18	0	0.7128	46.6261	34.3784	43.1824	PF03914.12|CBF;PF03061.17|4HBT	NA	NA	NA	NA	NA	NA	NA	NA	Down	0.200754	No	Down	0.778627	No	Up	0.336173	No
Ophcf2|00122	scaffold_01:897041-900138	Dead	Fungus	OK	29.4484	30.9652	0.072457	0.166108	0.7422	0.828593	no	CCAAT-box-binding transcription factor	PF03914|CBF;	NA	NA	NA	NA	NA	NA	NA	Ophio5|3819	0.842	1145.18	0	0.7128	46.6261	34.3784	43.1824	PF03914.12|CBF;PF03061.17|4HBT	NA	NA	NA	NA	NA	NA	NA	NA	Down	0.200754	No	Down	0.778627	No	Up	0.336173	No
Ophcf2|00123	scaffold_01:901127-902090	Alive	Dead	OK	153.175	79.5206	-0.945777	-1.89439	0.0001	0.000453723	yes	thioesterase family protein	PF03061|4HBT;	NA	NA	NA	NA	NA	NA	1;	Ophio5|3819	0.755	382.104	4.33e-126	0.9928	46.6261	34.3784	43.1824	PF03914.12|CBF;PF03061.17|4HBT	NA	NA	NA	NA	NA	NA	NA	NA	Down	0.200754	No	Down	0.778627	No	Up	0.336173	No
Ophcf2|00123	scaffold_01:901127-902090	Alive	Fungus	OK	153.175	124.017	-0.304646	-0.622147	0.22485	0.346529	no	thioesterase family protein	PF03061|4HBT;	NA	NA	NA	NA	NA	NA	1;	Ophio5|3819	0.755	382.104	4.33e-126	0.9928	46.6261	34.3784	43.1824	PF03914.12|CBF;PF03061.17|4HBT	NA	NA	NA	NA	NA	NA	NA	NA	Down	0.200754	No	Down	0.778627	No	Up	0.336173	No
Ophcf2|00123	scaffold_01:901127-902090	Dead	Fungus	OK	79.5206	124.017	0.641131	1.46315	0.00565	0.0164379	yes	thioesterase family protein	PF03061|4HBT;	NA	NA	NA	NA	NA	NA	1;	Ophio5|3819	0.755	382.104	4.33e-126	0.9928	46.6261	34.3784	43.1824	PF03914.12|CBF;PF03061.17|4HBT	NA	NA	NA	NA	NA	NA	NA	NA	Down	0.200754	No	Down	0.778627	No	Up	0.336173	No
Ophcf2|00124	scaffold_01:902379-903169	Alive	Fungus	OK	171.426	151.103	-0.182059	-0.409302	0.42595	0.563078	no	Adenylyl-sulfate kinase	PF01583|APS_kinase;	NA	NA	NA	NA	NA	NA	NA	Ophio5|3818	0.873	368.622	3.31e-132	0.9952	63.9501	98.5067	106.598	PF01583.15|APS_kinase	GO:0000103|sulfate assimilation;GO:0005524|ATP binding;GO:0004020|adenylylsulfate kinase activity	NA	NA	NA	NA	NA	NA	NA	Up	0.0895292	No	Up	0.0377162	No	Up	0.787688	No
Ophcf2|00124	scaffold_01:902379-903169	Dead	Fungus	OK	153.75	151.103	-0.0250548	-0.0564795	0.9139	0.945012	no	Adenylyl-sulfate kinase	PF01583|APS_kinase;	NA	NA	NA	NA	NA	NA	NA	Ophio5|3818	0.873	368.622	3.31e-132	0.9952	63.9501	98.5067	106.598	PF01583.15|APS_kinase	GO:0000103|sulfate assimilation;GO:0005524|ATP binding;GO:0004020|adenylylsulfate kinase activity	NA	NA	NA	NA	NA	NA	NA	Up	0.0895292	No	Up	0.0377162	No	Up	0.787688	No
Ophcf2|00124	scaffold_01:902379-903169	Alive	Dead	OK	171.426	153.75	-0.157005	-0.353103	0.42475	0.562181	no	Adenylyl-sulfate kinase	PF01583|APS_kinase;	NA	NA	NA	NA	NA	NA	NA	Ophio5|3818	0.873	368.622	3.31e-132	0.9952	63.9501	98.5067	106.598	PF01583.15|APS_kinase	GO:0000103|sulfate assimilation;GO:0005524|ATP binding;GO:0004020|adenylylsulfate kinase activity	NA	NA	NA	NA	NA	NA	NA	Up	0.0895292	No	Up	0.0377162	No	Up	0.787688	No
Ophcf2|00125	scaffold_01:903350-904788	Alive	Fungus	OK	102.521	128.498	0.325822	0.745367	0.15295	0.255985	no	V-type H+-transporting ATPase subunit C	PF03223|V-ATPase_C;	NA	NA	NA	GO:0022890|inorganic cation transmembrane transporter activity; GO:0005575|cellular_component; GO:0033180|proton-transporting V-type ATPase, V1 domain; GO:0044425|membrane part; GO:0003674|molecular_function; GO:0008324|cation transmembrane transporter activity; GO:0006811|ion transport; GO:1902600|proton transmembrane transport; GO:0034220|ion transmembrane transport; GO:0032991|protein-containi…	NA	NA	NA	Ophio5|3817	0.931	739.954	0	0.9975	90.8184	136.994	134.708	PF03223.10|V-ATPase_C	GO:0015078|hydrogen ion transmembrane transporter activity;GO:0033180|proton-transporting V-type ATPase, V1 domain;GO:0015991|ATP hydrolysis coupled proton transport	NA	NA	NA	NA	NA	NA	NA	Up	0.0782739	No	Up	0.0851461	No	Down	0.954615	No
Ophcf2|00125	scaffold_01:903350-904788	Alive	Dead	OK	102.521	99.0461	-0.0497469	-0.114419	0.79215	0.864929	no	V-type H+-transporting ATPase subunit C	PF03223|V-ATPase_C;	NA	NA	NA	GO:0022890|inorganic cation transmembrane transporter activity; GO:0005575|cellular_component; GO:0033180|proton-transporting V-type ATPase, V1 domain; GO:0044425|membrane part; GO:0003674|molecular_function; GO:0008324|cation transmembrane transporter activity; GO:0006811|ion transport; GO:1902600|proton transmembrane transport; GO:0034220|ion transmembrane transport; GO:0032991|protein-containi…	NA	NA	NA	Ophio5|3817	0.931	739.954	0	0.9975	90.8184	136.994	134.708	PF03223.10|V-ATPase_C	GO:0015078|hydrogen ion transmembrane transporter activity;GO:0033180|proton-transporting V-type ATPase, V1 domain;GO:0015991|ATP hydrolysis coupled proton transport	NA	NA	NA	NA	NA	NA	NA	Up	0.0782739	No	Up	0.0851461	No	Down	0.954615	No
Ophcf2|00125	scaffold_01:903350-904788	Dead	Fungus	OK	99.0461	128.498	0.375569	0.858064	0.09635	0.1776	no	V-type H+-transporting ATPase subunit C	PF03223|V-ATPase_C;	NA	NA	NA	GO:0022890|inorganic cation transmembrane transporter activity; GO:0005575|cellular_component; GO:0033180|proton-transporting V-type ATPase, V1 domain; GO:0044425|membrane part; GO:0003674|molecular_function; GO:0008324|cation transmembrane transporter activity; GO:0006811|ion transport; GO:1902600|proton transmembrane transport; GO:0034220|ion transmembrane transport; GO:0032991|protein-containi…	NA	NA	NA	Ophio5|3817	0.931	739.954	0	0.9975	90.8184	136.994	134.708	PF03223.10|V-ATPase_C	GO:0015078|hydrogen ion transmembrane transporter activity;GO:0033180|proton-transporting V-type ATPase, V1 domain;GO:0015991|ATP hydrolysis coupled proton transport	NA	NA	NA	NA	NA	NA	NA	Up	0.0782739	No	Up	0.0851461	No	Down	0.954615	No
Ophcf2|00126	scaffold_01:941403-944224	Alive	Fungus	OK	68.6167	74.8251	0.124963	0.273111	0.57985	0.701518	no	DNA binding domain with preference for A/T rich regions-like protein	NA	NA	NA	NA	NA	NA	NA	NA	Ophio5|3816	0.671	949.503	0	0.9988	54.6035	72.2589	71.2369	NA	NA	NA	NA	NA	NA	NA	NA	NA	Up	0.228708	No	Up	0.256061	No	Down	0.961412	No
Ophcf2|00126	scaffold_01:941403-944224	Alive	Dead	OK	68.6167	75.3764	0.135552	0.295246	0.50405	0.634808	no	DNA binding domain with preference for A/T rich regions-like protein	NA	NA	NA	NA	NA	NA	NA	NA	Ophio5|3816	0.671	949.503	0	0.9988	54.6035	72.2589	71.2369	NA	NA	NA	NA	NA	NA	NA	NA	NA	Up	0.228708	No	Up	0.256061	No	Down	0.961412	No
Ophcf2|00126	scaffold_01:941403-944224	Dead	Fungus	OK	75.3764	74.8251	-0.0105893	-0.0230638	0.9665	0.980408	no	DNA binding domain with preference for A/T rich regions-like protein	NA	NA	NA	NA	NA	NA	NA	NA	Ophio5|3816	0.671	949.503	0	0.9988	54.6035	72.2589	71.2369	NA	NA	NA	NA	NA	NA	NA	NA	NA	Up	0.228708	No	Up	0.256061	No	Down	0.961412	No
Ophcf2|00127	scaffold_01:945123-946799	Alive	Fungus	OK	107.289	90.4593	-0.246161	-0.55022	0.2802	0.40984	no	cyclin-like F-box	PF12937|F-box-like; PF00646|F-box;	NA	NA	NA	GO:0003674|molecular_function; GO:0005488|binding; GO:0005515|protein binding;	NA	NA	NA	Ophio5|3815	0.786	851.662	0	0.9963	44.3747	138.123	84.558	PF00646.28|F-box;PF12937.2|F-box-like	GO:0005515|protein binding	NA	NA	NA	NA	NA	NA	NA	Up	0.000285532	Yes	Up	0.00185084	No	Down	0.0536577	No
Ophcf2|00127	scaffold_01:945123-946799	Alive	Dead	OK	107.289	108.943	0.0220741	0.0487603	0.9077	0.94094	no	cyclin-like F-box	PF12937|F-box-like; PF00646|F-box;	NA	NA	NA	GO:0003674|molecular_function; GO:0005488|binding; GO:0005515|protein binding;	NA	NA	NA	Ophio5|3815	0.786	851.662	0	0.9963	44.3747	138.123	84.558	PF00646.28|F-box;PF12937.2|F-box-like	GO:0005515|protein binding	NA	NA	NA	NA	NA	NA	NA	Up	0.000285532	Yes	Up	0.00185084	No	Down	0.0536577	No
Ophcf2|00127	scaffold_01:945123-946799	Dead	Fungus	OK	108.943	90.4593	-0.268235	-0.603905	0.23595	0.35978	no	cyclin-like F-box	PF12937|F-box-like; PF00646|F-box;	NA	NA	NA	GO:0003674|molecular_function; GO:0005488|binding; GO:0005515|protein binding;	NA	NA	NA	Ophio5|3815	0.786	851.662	0	0.9963	44.3747	138.123	84.558	PF00646.28|F-box;PF12937.2|F-box-like	GO:0005515|protein binding	NA	NA	NA	NA	NA	NA	NA	Up	0.000285532	Yes	Up	0.00185084	No	Down	0.0536577	No
Ophcf2|00128	scaffold_01:950170-951005	Dead	Fungus	OK	93.4904	102.518	0.132989	0.289751	0.57375	0.695855	no	Modifier of rudimentary, Modr	PF07200|Mod_r;	NA	NA	NA	NA	NA	NA	NA	Ophio5|3812	0.852	381.333	3.44e-136	0.9959	104.555	63.0314	92.056	PF07200.8|Mod_r	NA	NA	NA	NA	NA	NA	NA	NA	Down	0.0291094	No	Down	0.631895	No	Up	0.127687	No
Ophcf2|00128	scaffold_01:950170-951005	Alive	Dead	OK	80.9981	93.4904	0.206931	0.42964	0.3312	0.466105	no	Modifier of rudimentary, Modr	PF07200|Mod_r;	NA	NA	NA	NA	NA	NA	NA	Ophio5|3812	0.852	381.333	3.44e-136	0.9959	104.555	63.0314	92.056	PF07200.8|Mod_r	NA	NA	NA	NA	NA	NA	NA	NA	Down	0.0291094	No	Down	0.631895	No	Up	0.127687	No
Ophcf2|00128	scaffold_01:950170-951005	Alive	Fungus	OK	80.9981	102.518	0.33992	0.714202	0.1591	0.264594	no	Modifier of rudimentary, Modr	PF07200|Mod_r;	NA	NA	NA	NA	NA	NA	NA	Ophio5|3812	0.852	381.333	3.44e-136	0.9959	104.555	63.0314	92.056	PF07200.8|Mod_r	NA	NA	NA	NA	NA	NA	NA	NA	Down	0.0291094	No	Down	0.631895	No	Up	0.127687	No
Ophcf2|00129	scaffold_01:951233-954184	Alive	Dead	OK	104.169	115.531	0.149362	0.29882	0.5044	0.635138	no	nuclear pore complex protein Nup107	PF04121|Nup84_Nup100;	NA	NA	NA	GO:0005575|cellular_component; GO:0005198|structural molecule activity; GO:0044446|intracellular organelle part; GO:0005643|nuclear pore; GO:0003674|molecular_function; GO:0044422|organelle part; GO:0044424|intracellular part; GO:0032991|protein-containing complex; GO:0044464|cell part; GO:0044428|nuclear part; GO:0017056|structural constituent of nuclear pore;	NA	NA	NA	Ophio5|3811	0.751	1395.56	0	0.9968	73.5754	98.858	114.152	PF04121.8|Nup84_Nup100;PF04121.8|Nup84_Nup100	GO:0006810|transport;GO:0005643|nuclear pore	NA	NA	NA	NA	NA	NA	NA	Up	0.248655	No	Up	0.0702197	No	Up	0.611454	No
Ophcf2|00129	scaffold_01:951233-954184	Dead	Fungus	OK	115.531	70.1086	-0.720619	-1.49812	0.00455	0.0136102	yes	nuclear pore complex protein Nup107	PF04121|Nup84_Nup100;	NA	NA	NA	GO:0005575|cellular_component; GO:0005198|structural molecule activity; GO:0044446|intracellular organelle part; GO:0005643|nuclear pore; GO:0003674|molecular_function; GO:0044422|organelle part; GO:0044424|intracellular part; GO:0032991|protein-containing complex; GO:0044464|cell part; GO:0044428|nuclear part; GO:0017056|structural constituent of nuclear pore;	NA	NA	NA	Ophio5|3811	0.751	1395.56	0	0.9968	73.5754	98.858	114.152	PF04121.8|Nup84_Nup100;PF04121.8|Nup84_Nup100	GO:0006810|transport;GO:0005643|nuclear pore	NA	NA	NA	NA	NA	NA	NA	Up	0.248655	No	Up	0.0702197	No	Up	0.611454	No
Ophcf2|00129	scaffold_01:951233-954184	Alive	Fungus	OK	104.169	70.1086	-0.571256	-1.18728	0.02255	0.0538892	no	nuclear pore complex protein Nup107	PF04121|Nup84_Nup100;	NA	NA	NA	GO:0005575|cellular_component; GO:0005198|structural molecule activity; GO:0044446|intracellular organelle part; GO:0005643|nuclear pore; GO:0003674|molecular_function; GO:0044422|organelle part; GO:0044424|intracellular part; GO:0032991|protein-containing complex; GO:0044464|cell part; GO:0044428|nuclear part; GO:0017056|structural constituent of nuclear pore;	NA	NA	NA	Ophio5|3811	0.751	1395.56	0	0.9968	73.5754	98.858	114.152	PF04121.8|Nup84_Nup100;PF04121.8|Nup84_Nup100	GO:0006810|transport;GO:0005643|nuclear pore	NA	NA	NA	NA	NA	NA	NA	Up	0.248655	No	Up	0.0702197	No	Up	0.611454	No
Ophcf2|00130	scaffold_01:954745-955156	Alive	Dead	OK	65.0999	71.1828	0.128873	0.16075	0.7155	0.808663	no	mature-T-cell-proliferation protein	PF08991|MTCP1;	NA	NA	NA	NA	NA	NA	NA	Ophio5|3809	0.803	133.265	3.06e-43	0.9383	66.5996	70.8053	64.9693	PF08991.5|DUF1903	NA	NA	NA	NA	NA	NA	NA	NA	Up	0.893724	No	Down	0.957181	No	Down	0.852432	No
Ophcf2|00130	scaffold_01:954745-955156	Alive	Fungus	OK	65.0999	160.296	1.30001	1.77725	0.00105	0.00374851	yes	mature-T-cell-proliferation protein	PF08991|MTCP1;	NA	NA	NA	NA	NA	NA	NA	Ophio5|3809	0.803	133.265	3.06e-43	0.9383	66.5996	70.8053	64.9693	PF08991.5|DUF1903	NA	NA	NA	NA	NA	NA	NA	NA	Up	0.893724	No	Down	0.957181	No	Down	0.852432	No
Ophcf2|00130	scaffold_01:954745-955156	Dead	Fungus	OK	71.1828	160.296	1.17113	1.59489	0.0031	0.00972187	yes	mature-T-cell-proliferation protein	PF08991|MTCP1;	NA	NA	NA	NA	NA	NA	NA	Ophio5|3809	0.803	133.265	3.06e-43	0.9383	66.5996	70.8053	64.9693	PF08991.5|DUF1903	NA	NA	NA	NA	NA	NA	NA	NA	Up	0.893724	No	Down	0.957181	No	Down	0.852432	No
Ophcf2|00131	scaffold_01:955965-956359	Alive	Dead	OK	451.69	426.642	-0.0823067	-0.177008	0.6902	0.790339	no	ubiquitin-like modifier SUMO	PF00240|ubiquitin; PF11976|Rad60-SLD;	NA	NA	NA	GO:0003674|molecular_function; GO:0005488|binding; GO:0005515|protein binding;	NA	NA	NA	Ophio5|3808	0.866	168.318	1.93e-56	0.9314	312.418	361.871	401.65	PF11976.3|Rad60-SLD;PF00240.18|ubiquitin	GO:0005515|protein binding	NA	NA	NA	NA	NA	NA	NA	Up	0.586557	No	Up	0.313894	No	Up	0.698741	No
Ophcf2|00131	scaffold_01:955965-956359	Dead	Fungus	OK	426.642	476.405	0.159161	0.344308	0.4969	0.628298	no	ubiquitin-like modifier SUMO	PF00240|ubiquitin; PF11976|Rad60-SLD;	NA	NA	NA	GO:0003674|molecular_function; GO:0005488|binding; GO:0005515|protein binding;	NA	NA	NA	Ophio5|3808	0.866	168.318	1.93e-56	0.9314	312.418	361.871	401.65	PF11976.3|Rad60-SLD;PF00240.18|ubiquitin	GO:0005515|protein binding	NA	NA	NA	NA	NA	NA	NA	Up	0.586557	No	Up	0.313894	No	Up	0.698741	No
Ophcf2|00131	scaffold_01:955965-956359	Alive	Fungus	OK	451.69	476.405	0.0768541	0.166294	0.7454	0.831048	no	ubiquitin-like modifier SUMO	PF00240|ubiquitin; PF11976|Rad60-SLD;	NA	NA	NA	GO:0003674|molecular_function; GO:0005488|binding; GO:0005515|protein binding;	NA	NA	NA	Ophio5|3808	0.866	168.318	1.93e-56	0.9314	312.418	361.871	401.65	PF11976.3|Rad60-SLD;PF00240.18|ubiquitin	GO:0005515|protein binding	NA	NA	NA	NA	NA	NA	NA	Up	0.586557	No	Up	0.313894	No	Up	0.698741	No
Ophcf2|00132	scaffold_01:956663-959696	Alive	Fungus	OK	14.8772	59.1782	1.99196	4.22341	5e-05	0.000237974	yes	LIM domain protein	PF00412|LIM;	NA	NA	NA	NA	NA	NA	NA	Ophio5|3807	0.643	810.446	0	0.8262	32.9798	8.42913	31.388	PF00412.17|LIM;PF00412.17|LIM	GO:0008270|zinc ion binding	NA	NA	NA	NA	NA	NA	NA	Down	0.000285532	Yes	Down	0.866967	No	Up	0.000285532	Yes
Ophcf2|00132	scaffold_01:956663-959696	Dead	Fungus	OK	26.9846	59.1782	1.13293	2.5039	5e-05	0.000237974	yes	LIM domain protein	PF00412|LIM;	NA	NA	NA	NA	NA	NA	NA	Ophio5|3807	0.643	810.446	0	0.8262	32.9798	8.42913	31.388	PF00412.17|LIM;PF00412.17|LIM	GO:0008270|zinc ion binding	NA	NA	NA	NA	NA	NA	NA	Down	0.000285532	Yes	Down	0.866967	No	Up	0.000285532	Yes
Ophcf2|00132	scaffold_01:956663-959696	Alive	Dead	OK	14.8772	26.9846	0.859034	1.79538	5e-05	0.000237974	yes	LIM domain protein	PF00412|LIM;	NA	NA	NA	NA	NA	NA	NA	Ophio5|3807	0.643	810.446	0	0.8262	32.9798	8.42913	31.388	PF00412.17|LIM;PF00412.17|LIM	GO:0008270|zinc ion binding	NA	NA	NA	NA	NA	NA	NA	Down	0.000285532	Yes	Down	0.866967	No	Up	0.000285532	Yes
Ophcf2|00133	scaffold_01:960440-963003	Alive	Fungus	OK	78.8116	52.3914	-0.589077	-1.2924	0.01375	0.0354346	yes	dynamin-2	PF02212|GED; PF01031|Dynamin_M; PF00350|Dynamin_N;	NA	NA	NA	GO:0035639|purine ribonucleoside triphosphate binding; GO:0032549|ribonucleoside binding; GO:0019001|guanyl nucleotide binding; GO:0097159|organic cyclic compound binding; GO:0003674|molecular_function; GO:0032553|ribonucleotide binding; GO:0005488|binding; GO:0016787|hydrolase activity; GO:0016462|pyrophosphatase activity; GO:0043167|ion binding; GO:0005525|GTP binding; GO:0000166|nucleotide bin…	NA	NA	NA	Ophio5|3805	0.943	1501.11	0	0.9987	121.728	65.0539	54.6036	PF01031.15|Dynamin_M;PF00350.18|Dynamin_N;PF02212.13|GED	GO:0005525|GTP binding;GO:0003924|GTPase activity	NA	NA	NA	NA	NA	NA	NA	Down	0.00858494	No	Down	0.000770107	Yes	Down	0.48966	No
Ophcf2|00133	scaffold_01:960440-963003	Dead	Fungus	OK	68.5143	52.3914	-0.387074	-0.865606	0.0891	0.166686	no	dynamin-2	PF02212|GED; PF01031|Dynamin_M; PF00350|Dynamin_N;	NA	NA	NA	GO:0035639|purine ribonucleoside triphosphate binding; GO:0032549|ribonucleoside binding; GO:0019001|guanyl nucleotide binding; GO:0097159|organic cyclic compound binding; GO:0003674|molecular_function; GO:0032553|ribonucleotide binding; GO:0005488|binding; GO:0016787|hydrolase activity; GO:0016462|pyrophosphatase activity; GO:0043167|ion binding; GO:0005525|GTP binding; GO:0000166|nucleotide bin…	NA	NA	NA	Ophio5|3805	0.943	1501.11	0	0.9987	121.728	65.0539	54.6036	PF01031.15|Dynamin_M;PF00350.18|Dynamin_N;PF02212.13|GED	GO:0005525|GTP binding;GO:0003924|GTPase activity	NA	NA	NA	NA	NA	NA	NA	Down	0.00858494	No	Down	0.000770107	Yes	Down	0.48966	No
Ophcf2|00133	scaffold_01:960440-963003	Alive	Dead	OK	78.8116	68.5143	-0.202003	-0.436336	0.32615	0.460832	no	dynamin-2	PF02212|GED; PF01031|Dynamin_M; PF00350|Dynamin_N;	NA	NA	NA	GO:0035639|purine ribonucleoside triphosphate binding; GO:0032549|ribonucleoside binding; GO:0019001|guanyl nucleotide binding; GO:0097159|organic cyclic compound binding; GO:0003674|molecular_function; GO:0032553|ribonucleotide binding; GO:0005488|binding; GO:0016787|hydrolase activity; GO:0016462|pyrophosphatase activity; GO:0043167|ion binding; GO:0005525|GTP binding; GO:0000166|nucleotide bin…	NA	NA	NA	Ophio5|3805	0.943	1501.11	0	0.9987	121.728	65.0539	54.6036	PF01031.15|Dynamin_M;PF00350.18|Dynamin_N;PF02212.13|GED	GO:0005525|GTP binding;GO:0003924|GTPase activity	NA	NA	NA	NA	NA	NA	NA	Down	0.00858494	No	Down	0.000770107	Yes	Down	0.48966	No
Ophcf2|00134	scaffold_01:963557-966118	Alive	Fungus	OK	66.6975	68.5188	0.0388665	0.0857604	0.8678	0.914925	no	F-box domain containing protein	NA	NA	NA	NA	NA	NA	NA	NA	Ophio5|3804	0.406	565.459	0	0.9821	33.6957	35.249	37.4125	NA	NA	NA	NA	NA	NA	NA	NA	NA	Up	0.876636	No	Up	0.694171	No	Up	0.829035	No
Ophcf2|00134	scaffold_01:963557-966118	Dead	Fungus	OK	62.108	68.5188	0.141721	0.313488	0.5443	0.670927	no	F-box domain containing protein	NA	NA	NA	NA	NA	NA	NA	NA	Ophio5|3804	0.406	565.459	0	0.9821	33.6957	35.249	37.4125	NA	NA	NA	NA	NA	NA	NA	NA	NA	Up	0.876636	No	Up	0.694171	No	Up	0.829035	No
Ophcf2|00134	scaffold_01:963557-966118	Alive	Dead	OK	66.6975	62.108	-0.102854	-0.22613	0.60165	0.71906	no	F-box domain containing protein	NA	NA	NA	NA	NA	NA	NA	NA	Ophio5|3804	0.406	565.459	0	0.9821	33.6957	35.249	37.4125	NA	NA	NA	NA	NA	NA	NA	NA	NA	Up	0.876636	No	Up	0.694171	No	Up	0.829035	No
Ophcf2|00135	scaffold_01:967671-969780	Alive	Dead	OK	18.6269	18.6386	0.000903089	0.00182974	0.9968	0.998003	no	putative enterotoxin	PF01375|Enterotoxin_a;	Has signal peptide;	NA	NA	GO:0044419|interspecies interaction between organisms; GO:0005575|cellular_component; GO:0003674|molecular_function; GO:0044421|extracellular region part; GO:0008150|biological_process; GO:0009405|pathogenesis; GO:0051704|multi-organism process; GO:0090729|toxin activity; GO:0005615|extracellular space;	NA	NA	1;	Ophio5|3803	0.523	623.624	0	0.8848	35.3715	29.6274	15.4565	PF01375.12|Enterotoxin_a;PF01375.12|Enterotoxin_a	GO:0005576|extracellular region;GO:0009405|pathogenesis;GO:0003824|catalytic activity	NA	SignalP: has predicted secretion signal	NA	NA	NA	NA	NA	Down	0.49383	No	Down	0.000770107	Yes	Down	0.00763963	No
Ophcf2|00135	scaffold_01:967671-969780	Alive	Fungus	OK	18.6269	24.1718	0.375932	0.783237	0.13235	0.228347	no	putative enterotoxin	PF01375|Enterotoxin_a;	Has signal peptide;	NA	NA	GO:0044419|interspecies interaction between organisms; GO:0005575|cellular_component; GO:0003674|molecular_function; GO:0044421|extracellular region part; GO:0008150|biological_process; GO:0009405|pathogenesis; GO:0051704|multi-organism process; GO:0090729|toxin activity; GO:0005615|extracellular space;	NA	NA	1;	Ophio5|3803	0.523	623.624	0	0.8848	35.3715	29.6274	15.4565	PF01375.12|Enterotoxin_a;PF01375.12|Enterotoxin_a	GO:0005576|extracellular region;GO:0009405|pathogenesis;GO:0003824|catalytic activity	NA	SignalP: has predicted secretion signal	NA	NA	NA	NA	NA	Down	0.49383	No	Down	0.000770107	Yes	Down	0.00763963	No
Ophcf2|00135	scaffold_01:967671-969780	Dead	Fungus	OK	18.6386	24.1718	0.375029	0.780846	0.1351	0.232089	no	putative enterotoxin	PF01375|Enterotoxin_a;	Has signal peptide;	NA	NA	GO:0044419|interspecies interaction between organisms; GO:0005575|cellular_component; GO:0003674|molecular_function; GO:0044421|extracellular region part; GO:0008150|biological_process; GO:0009405|pathogenesis; GO:0051704|multi-organism process; GO:0090729|toxin activity; GO:0005615|extracellular space;	NA	NA	1;	Ophio5|3803	0.523	623.624	0	0.8848	35.3715	29.6274	15.4565	PF01375.12|Enterotoxin_a;PF01375.12|Enterotoxin_a	GO:0005576|extracellular region;GO:0009405|pathogenesis;GO:0003824|catalytic activity	NA	SignalP: has predicted secretion signal	NA	NA	NA	NA	NA	Down	0.49383	No	Down	0.000770107	Yes	Down	0.00763963	No
Ophcf2|00136	scaffold_01:969996-972645	Alive	Fungus	OK	31.7296	26.1638	-0.278258	-0.620869	0.2304	0.353214	no	Transcription factor, fungi	PF00172|Zn_clus; PF04082|Fungal_trans;	NA	NA	Fungal Specific TF;	GO:0009889|regulation of biosynthetic process; GO:0018130|heterocycle biosynthetic process; GO:0005575|cellular_component; GO:0097659|nucleic acid-templated transcription; GO:0097159|organic cyclic compound binding; GO:0051252|regulation of RNA metabolic process; GO:0019222|regulation of metabolic process; GO:0003674|molecular_function; GO:0031323|regulation of cellular metabolic process; GO:0010…	NA	NA	NA	Ophio5|3802	0.816	806.209	0	0.5814	45.5824	20.114	18.9697	PF04082.13|Fungal_trans	GO:0003677|DNA binding;GO:0005634|nucleus;GO:0008270|zinc ion binding;GO:0006351|transcription, DNA-templated	NA	NA	Zn2Cys6	NA	NA	NA	NA	Down	0.000770107	Yes	Down	0.000285532	Yes	Down	0.863671	No
Ophcf2|00136	scaffold_01:969996-972645	Dead	Fungus	OK	28.8797	26.1638	-0.142486	-0.317174	0.5327	0.659985	no	Transcription factor, fungi	PF00172|Zn_clus; PF04082|Fungal_trans;	NA	NA	Fungal Specific TF;	GO:0009889|regulation of biosynthetic process; GO:0018130|heterocycle biosynthetic process; GO:0005575|cellular_component; GO:0097659|nucleic acid-templated transcription; GO:0097159|organic cyclic compound binding; GO:0051252|regulation of RNA metabolic process; GO:0019222|regulation of metabolic process; GO:0003674|molecular_function; GO:0031323|regulation of cellular metabolic process; GO:0010…	NA	NA	NA	Ophio5|3802	0.816	806.209	0	0.5814	45.5824	20.114	18.9697	PF04082.13|Fungal_trans	GO:0003677|DNA binding;GO:0005634|nucleus;GO:0008270|zinc ion binding;GO:0006351|transcription, DNA-templated	NA	NA	Zn2Cys6	NA	NA	NA	NA	Down	0.000770107	Yes	Down	0.000285532	Yes	Down	0.863671	No
Ophcf2|00136	scaffold_01:969996-972645	Alive	Dead	OK	31.7296	28.8797	-0.135773	-0.30569	0.4931	0.624812	no	Transcription factor, fungi	PF00172|Zn_clus; PF04082|Fungal_trans;	NA	NA	Fungal Specific TF;	GO:0009889|regulation of biosynthetic process; GO:0018130|heterocycle biosynthetic process; GO:0005575|cellular_component; GO:0097659|nucleic acid-templated transcription; GO:0097159|organic cyclic compound binding; GO:0051252|regulation of RNA metabolic process; GO:0019222|regulation of metabolic process; GO:0003674|molecular_function; GO:0031323|regulation of cellular metabolic process; GO:0010…	NA	NA	NA	Ophio5|3802	0.816	806.209	0	0.5814	45.5824	20.114	18.9697	PF04082.13|Fungal_trans	GO:0003677|DNA binding;GO:0005634|nucleus;GO:0008270|zinc ion binding;GO:0006351|transcription, DNA-templated	NA	NA	Zn2Cys6	NA	NA	NA	NA	Down	0.000770107	Yes	Down	0.000285532	Yes	Down	0.863671	No
Ophcf2|00137	scaffold_01:973884-974724	Dead	Fungus	OK	161.609	201.16	0.31584	0.722374	0.16185	0.268216	no	Monothiol glutaredoxin-4	PF00085|Thioredoxin; PF00462|Glutaredoxin;	NA	NA	NA	GO:0003824|catalytic activity; GO:0065008|regulation of biological quality; GO:0065007|biological regulation; GO:0015035|protein disulfide oxidoreductase activity; GO:0016491|oxidoreductase activity; GO:0003674|molecular_function; GO:0015036|disulfide oxidoreductase activity; GO:0050794|regulation of cellular process; GO:0016667|oxidoreductase activity, acting on a sulfur group of donors; GO:0008…	NA	NA	NA	Ophio5|3800	0.877	450.284	8.74e-163	0.9962	108.154	148.137	156.667	PF00462.19|Glutaredoxin;PF00085.15|Thioredoxin	GO:0015035|protein disulfide oxidoreductase activity;GO:0045454|cell redox homeostasis;GO:0009055|electron carrier activity	NA	NA	NA	NA	NA	NA	NA	Up	0.183691	No	Up	0.112463	No	Up	0.842061	No
Ophcf2|00137	scaffold_01:973884-974724	Alive	Dead	OK	137.453	161.609	0.233571	0.532463	0.2306	0.35337	no	Monothiol glutaredoxin-4	PF00085|Thioredoxin; PF00462|Glutaredoxin;	NA	NA	NA	GO:0003824|catalytic activity; GO:0065008|regulation of biological quality; GO:0065007|biological regulation; GO:0015035|protein disulfide oxidoreductase activity; GO:0016491|oxidoreductase activity; GO:0003674|molecular_function; GO:0015036|disulfide oxidoreductase activity; GO:0050794|regulation of cellular process; GO:0016667|oxidoreductase activity, acting on a sulfur group of donors; GO:0008…	NA	NA	NA	Ophio5|3800	0.877	450.284	8.74e-163	0.9962	108.154	148.137	156.667	PF00462.19|Glutaredoxin;PF00085.15|Thioredoxin	GO:0015035|protein disulfide oxidoreductase activity;GO:0045454|cell redox homeostasis;GO:0009055|electron carrier activity	NA	NA	NA	NA	NA	NA	NA	Up	0.183691	No	Up	0.112463	No	Up	0.842061	No
Ophcf2|00137	scaffold_01:973884-974724	Alive	Fungus	OK	137.453	201.16	0.549411	1.24536	0.01675	0.0418362	yes	Monothiol glutaredoxin-4	PF00085|Thioredoxin; PF00462|Glutaredoxin;	NA	NA	NA	GO:0003824|catalytic activity; GO:0065008|regulation of biological quality; GO:0065007|biological regulation; GO:0015035|protein disulfide oxidoreductase activity; GO:0016491|oxidoreductase activity; GO:0003674|molecular_function; GO:0015036|disulfide oxidoreductase activity; GO:0050794|regulation of cellular process; GO:0016667|oxidoreductase activity, acting on a sulfur group of donors; GO:0008…	NA	NA	NA	Ophio5|3800	0.877	450.284	8.74e-163	0.9962	108.154	148.137	156.667	PF00462.19|Glutaredoxin;PF00085.15|Thioredoxin	GO:0015035|protein disulfide oxidoreductase activity;GO:0045454|cell redox homeostasis;GO:0009055|electron carrier activity	NA	NA	NA	NA	NA	NA	NA	Up	0.183691	No	Up	0.112463	No	Up	0.842061	No
Ophcf2|00138	scaffold_01:975355-977736	Alive	Dead	OK	63.6221	86.1426	0.437199	0.953759	0.03095	0.070221	no	actin binding protein	PF00241|Cofilin_ADF; PF14604|SH3_9; PF00018|SH3_1;	NA	NA	NA	GO:0005575|cellular_component; GO:0005488|binding; GO:0008092|cytoskeletal protein binding; GO:0005622|intracellular; GO:0003674|molecular_function; GO:0003779|actin binding; GO:0044464|cell part; GO:0005515|protein binding;	NA	NA	NA	Ophio5|3799	0.857	1205.28	0	0.9987	109.799	73.7109	63.0113	PF14604.1|SH3_9;PF14604.1|SH3_9;PF00018.23|SH3_1;PF00018.23|SH3_1;PF00241.15|Cofilin_ADF;PF07653.12|SH3_2;PF07653.12|SH3_2	GO:0003779|actin binding;GO:0005622|intracellular;GO:0005515|protein binding	NA	NA	NA	NA	NA	NA	NA	Down	0.105258	No	Down	0.0174422	No	Down	0.536759	No
Ophcf2|00138	scaffold_01:975355-977736	Dead	Fungus	OK	86.1426	110.502	0.35927	0.761607	0.13045	0.225773	no	actin binding protein	PF00241|Cofilin_ADF; PF14604|SH3_9; PF00018|SH3_1;	NA	NA	NA	GO:0005575|cellular_component; GO:0005488|binding; GO:0008092|cytoskeletal protein binding; GO:0005622|intracellular; GO:0003674|molecular_function; GO:0003779|actin binding; GO:0044464|cell part; GO:0005515|protein binding;	NA	NA	NA	Ophio5|3799	0.857	1205.28	0	0.9987	109.799	73.7109	63.0113	PF14604.1|SH3_9;PF14604.1|SH3_9;PF00018.23|SH3_1;PF00018.23|SH3_1;PF00241.15|Cofilin_ADF;PF07653.12|SH3_2;PF07653.12|SH3_2	GO:0003779|actin binding;GO:0005622|intracellular;GO:0005515|protein binding	NA	NA	NA	NA	NA	NA	NA	Down	0.105258	No	Down	0.0174422	No	Down	0.536759	No
Ophcf2|00138	scaffold_01:975355-977736	Alive	Fungus	OK	63.6221	110.502	0.796469	1.71339	0.00105	0.00374851	yes	actin binding protein	PF00241|Cofilin_ADF; PF14604|SH3_9; PF00018|SH3_1;	NA	NA	NA	GO:0005575|cellular_component; GO:0005488|binding; GO:0008092|cytoskeletal protein binding; GO:0005622|intracellular; GO:0003674|molecular_function; GO:0003779|actin binding; GO:0044464|cell part; GO:0005515|protein binding;	NA	NA	NA	Ophio5|3799	0.857	1205.28	0	0.9987	109.799	73.7109	63.0113	PF14604.1|SH3_9;PF14604.1|SH3_9;PF00018.23|SH3_1;PF00018.23|SH3_1;PF00241.15|Cofilin_ADF;PF07653.12|SH3_2;PF07653.12|SH3_2	GO:0003779|actin binding;GO:0005622|intracellular;GO:0005515|protein binding	NA	NA	NA	NA	NA	NA	NA	Down	0.105258	No	Down	0.0174422	No	Down	0.536759	No
Ophcf2|00139	scaffold_01:978292-978860	Alive	Dead	OK	1241.61	1122.82	-0.145086	-0.329923	0.44985	0.585698	no	signaling protein	PF12734|CYSTM;	NA	NA	NA	NA	NA	NA	NA	Ophio5|3798	0.959	182.57	1.16e-59	1	189.283	894.886	1022.8	NA	NA	NA	NA	NA	NA	NA	NA	NA	Up	0.000285532	Yes	Up	0.000285532	Yes	Up	0.700554	No
Ophcf2|00139	scaffold_01:978292-978860	Alive	Fungus	OK	1241.61	971.36	-0.354136	-0.808194	0.11605	0.206245	no	signaling protein	PF12734|CYSTM;	NA	NA	NA	NA	NA	NA	NA	Ophio5|3798	0.959	182.57	1.16e-59	1	189.283	894.886	1022.8	NA	NA	NA	NA	NA	NA	NA	NA	NA	Up	0.000285532	Yes	Up	0.000285532	Yes	Up	0.700554	No
Ophcf2|00139	scaffold_01:978292-978860	Dead	Fungus	OK	1122.82	971.36	-0.20905	-0.479675	0.344	0.479953	no	signaling protein	PF12734|CYSTM;	NA	NA	NA	NA	NA	NA	NA	Ophio5|3798	0.959	182.57	1.16e-59	1	189.283	894.886	1022.8	NA	NA	NA	NA	NA	NA	NA	NA	NA	Up	0.000285532	Yes	Up	0.000285532	Yes	Up	0.700554	No
Ophcf2|00140	scaffold_01:986453-987836	Alive	Fungus	OK	4.56946	2.28271	-1.00127	-1.28186	0.01385	0.0356454	yes	predicted protein	NA	NA	NA	NA	NA	NA	NA	NA	Ophio5|3797	0.518	381.333	4.44e-129	0.9978	3.80317	34.1989	47.2149	NA	NA	NA	NA	NA	NA	NA	NA	NA	Up	0.000285532	Yes	Up	0.000285532	Yes	Up	0.204558	No
Ophcf2|00140	scaffold_01:986453-987836	Dead	Fungus	OK	3.28459	2.28271	-0.524967	-0.647479	0.2036	0.320957	no	predicted protein	NA	NA	NA	NA	NA	NA	NA	NA	Ophio5|3797	0.518	381.333	4.44e-129	0.9978	3.80317	34.1989	47.2149	NA	NA	NA	NA	NA	NA	NA	NA	NA	Up	0.000285532	Yes	Up	0.000285532	Yes	Up	0.204558	No
Ophcf2|00140	scaffold_01:986453-987836	Alive	Dead	OK	4.56946	3.28459	-0.476307	-0.620194	0.1637	0.270451	no	predicted protein	NA	NA	NA	NA	NA	NA	NA	NA	Ophio5|3797	0.518	381.333	4.44e-129	0.9978	3.80317	34.1989	47.2149	NA	NA	NA	NA	NA	NA	NA	NA	NA	Up	0.000285532	Yes	Up	0.000285532	Yes	Up	0.204558	No
Ophcf2|00141	scaffold_01:988497-990420	Alive	Dead	OK	140.62	154.869	0.139242	0.287331	0.5043	0.635086	no	Eukaryotic translation initiation factor 3 subunit D	PF05091|eIF-3_zeta;	NA	NA	NA	GO:0003743|translation initiation factor activity; GO:0045182|translation regulator activity; GO:0005488|binding; GO:0005575|cellular_component; GO:0097159|organic cyclic compound binding; GO:0044424|intracellular part; GO:0003674|molecular_function; GO:0005852|eukaryotic translation initiation factor 3 complex; GO:0003723|RNA binding; GO:0044444|cytoplasmic part; GO:0044464|cell part; GO:0090079…	NA	NA	NA	Ophio5|3796	0.935	1010.75	0	0.9983	123.113	157.41	159.565	PF05091.7|eIF-3_zeta	GO:0005852|eukaryotic translation initiation factor 3 complex;GO:0005737|cytoplasm;GO:0003743|translation initiation factor activity	NA	NA	NA	NA	NA	NA	NA	Up	0.349734	No	Up	0.305796	No	Up	0.967137	No
Ophcf2|00141	scaffold_01:988497-990420	Alive	Fungus	OK	140.62	194.255	0.466145	0.949831	0.0627	0.125133	no	Eukaryotic translation initiation factor 3 subunit D	PF05091|eIF-3_zeta;	NA	NA	NA	GO:0003743|translation initiation factor activity; GO:0045182|translation regulator activity; GO:0005488|binding; GO:0005575|cellular_component; GO:0097159|organic cyclic compound binding; GO:0044424|intracellular part; GO:0003674|molecular_function; GO:0005852|eukaryotic translation initiation factor 3 complex; GO:0003723|RNA binding; GO:0044444|cytoplasmic part; GO:0044464|cell part; GO:0090079…	NA	NA	NA	Ophio5|3796	0.935	1010.75	0	0.9983	123.113	157.41	159.565	PF05091.7|eIF-3_zeta	GO:0005852|eukaryotic translation initiation factor 3 complex;GO:0005737|cytoplasm;GO:0003743|translation initiation factor activity	NA	NA	NA	NA	NA	NA	NA	Up	0.349734	No	Up	0.305796	No	Up	0.967137	No
Ophcf2|00141	scaffold_01:988497-990420	Dead	Fungus	OK	154.869	194.255	0.326903	0.662362	0.19815	0.314364	no	Eukaryotic translation initiation factor 3 subunit D	PF05091|eIF-3_zeta;	NA	NA	NA	GO:0003743|translation initiation factor activity; GO:0045182|translation regulator activity; GO:0005488|binding; GO:0005575|cellular_component; GO:0097159|organic cyclic compound binding; GO:0044424|intracellular part; GO:0003674|molecular_function; GO:0005852|eukaryotic translation initiation factor 3 complex; GO:0003723|RNA binding; GO:0044444|cytoplasmic part; GO:0044464|cell part; GO:0090079…	NA	NA	NA	Ophio5|3796	0.935	1010.75	0	0.9983	123.113	157.41	159.565	PF05091.7|eIF-3_zeta	GO:0005852|eukaryotic translation initiation factor 3 complex;GO:0005737|cytoplasm;GO:0003743|translation initiation factor activity	NA	NA	NA	NA	NA	NA	NA	Up	0.349734	No	Up	0.305796	No	Up	0.967137	No
Ophcf2|00142	scaffold_01:990824-992729	Dead	Fungus	OK	34.8327	138.623	1.99266	4.23581	5e-05	0.000237974	yes	BZIP-type transcription factor	NA	NA	NA	NA	NA	NA	NA	NA	Ophio5|3795	0.808	573.548	0	0.9026	42.2333	68.7539	30.9393	NA	NA	NA	NA	NA	NA	NA	NA	NA	Up	0.0529187	No	Down	0.233804	No	Down	0.00164691	Yes
Ophcf2|00142	scaffold_01:990824-992729	Alive	Fungus	OK	43.2661	138.623	1.67986	3.25622	5e-05	0.000237974	yes	BZIP-type transcription factor	NA	NA	NA	NA	NA	NA	NA	NA	Ophio5|3795	0.808	573.548	0	0.9026	42.2333	68.7539	30.9393	NA	NA	NA	NA	NA	NA	NA	NA	NA	Up	0.0529187	No	Down	0.233804	No	Down	0.00164691	Yes
Ophcf2|00142	scaffold_01:990824-992729	Alive	Dead	OK	43.2661	34.8327	-0.312796	-0.579508	0.1887	0.302419	no	BZIP-type transcription factor	NA	NA	NA	NA	NA	NA	NA	NA	Ophio5|3795	0.808	573.548	0	0.9026	42.2333	68.7539	30.9393	NA	NA	NA	NA	NA	NA	NA	NA	NA	Up	0.0529187	No	Down	0.233804	No	Down	0.00164691	Yes
Ophcf2|00143	scaffold_01:993246-994219	Alive	Fungus	OK	24.792	85.2063	1.78109	3.24647	5e-05	0.000237974	yes	acyltransferase	PF16076|Acyltransf_C; PF01553|Acyltransferase;	NA	NA	NA	GO:0003824|catalytic activity; GO:0016740|transferase activity; GO:0016746|transferase activity, transferring acyl groups; GO:0003674|molecular_function;	NA	NA	NA	Ophio5|3794	0.875	522.702	0	0.977	40.0749	47.1436	32.7349	PF01553.16|Acyltransferase	GO:0016746|transferase activity, transferring acyl groups;GO:0008152|metabolic process	NA	NA	NA	3	NA	NA	NA	Up	0.579305	No	Down	0.4849	No	Down	0.178838	No
Ophcf2|00143	scaffold_01:993246-994219	Alive	Dead	OK	24.792	22.5452	-0.13705	-0.225298	0.618	0.73215	no	acyltransferase	PF16076|Acyltransf_C; PF01553|Acyltransferase;	NA	NA	NA	GO:0003824|catalytic activity; GO:0016740|transferase activity; GO:0016746|transferase activity, transferring acyl groups; GO:0003674|molecular_function;	NA	NA	NA	Ophio5|3794	0.875	522.702	0	0.977	40.0749	47.1436	32.7349	PF01553.16|Acyltransferase	GO:0016746|transferase activity, transferring acyl groups;GO:0008152|metabolic process	NA	NA	NA	3	NA	NA	NA	Up	0.579305	No	Down	0.4849	No	Down	0.178838	No
Ophcf2|00143	scaffold_01:993246-994219	Dead	Fungus	OK	22.5452	85.2063	1.91814	3.69571	5e-05	0.000237974	yes	acyltransferase	PF16076|Acyltransf_C; PF01553|Acyltransferase;	NA	NA	NA	GO:0003824|catalytic activity; GO:0016740|transferase activity; GO:0016746|transferase activity, transferring acyl groups; GO:0003674|molecular_function;	NA	NA	NA	Ophio5|3794	0.875	522.702	0	0.977	40.0749	47.1436	32.7349	PF01553.16|Acyltransferase	GO:0016746|transferase activity, transferring acyl groups;GO:0008152|metabolic process	NA	NA	NA	3	NA	NA	NA	Up	0.579305	No	Down	0.4849	No	Down	0.178838	No
Ophcf2|00144	scaffold_01:996516-1002464	Alive	Dead	OK	29.5186	28.6959	-0.0407799	-0.0846824	0.8449	0.90042	no	Serine/threonine-protein kinase domain protein	PF07714|Pkinase_Tyr; PF00072|Response_reg; PF00069|Pkinase;	NA	NA	NA	GO:0035639|purine ribonucleoside triphosphate binding; GO:0006464|cellular protein modification process; GO:0097159|organic cyclic compound binding; GO:0003674|molecular_function; GO:0016772|transferase activity, transferring phosphorus-containing groups; GO:0032553|ribonucleotide binding; GO:0071704|organic substance metabolic process; GO:0009987|cellular process; GO:0016301|kinase activity; GO:…	NA	NA	NA	Ophio5|3793	0.895	3314.63	0	0.9984	49.6486	16.4087	15.8327	PF00069.20|Pkinase;PF00069.20|Pkinase;PF07714.12|Pkinase_Tyr;PF07714.12|Pkinase_Tyr;PF00072.19|Response_reg	GO:0005524|ATP binding;GO:0000156|phosphorelay response regulator activity;GO:0000160|phosphorelay signal transduction system;GO:0004672|protein kinase activity;GO:0006468|protein phosphorylation	NA	NA	NA	NA	NA	NA	NA	Down	0.000285532	Yes	Down	0.000285532	Yes	Down	0.901041	No
Ophcf2|00144	scaffold_01:996516-1002464	Alive	Fungus	OK	29.5186	50.1679	0.765141	1.52538	0.00265	0.00846195	yes	Serine/threonine-protein kinase domain protein	PF07714|Pkinase_Tyr; PF00072|Response_reg; PF00069|Pkinase;	NA	NA	NA	GO:0035639|purine ribonucleoside triphosphate binding; GO:0006464|cellular protein modification process; GO:0097159|organic cyclic compound binding; GO:0003674|molecular_function; GO:0016772|transferase activity, transferring phosphorus-containing groups; GO:0032553|ribonucleotide binding; GO:0071704|organic substance metabolic process; GO:0009987|cellular process; GO:0016301|kinase activity; GO:…	NA	NA	NA	Ophio5|3793	0.895	3314.63	0	0.9984	49.6486	16.4087	15.8327	PF00069.20|Pkinase;PF00069.20|Pkinase;PF07714.12|Pkinase_Tyr;PF07714.12|Pkinase_Tyr;PF00072.19|Response_reg	GO:0005524|ATP binding;GO:0000156|phosphorelay response regulator activity;GO:0000160|phosphorelay signal transduction system;GO:0004672|protein kinase activity;GO:0006468|protein phosphorylation	NA	NA	NA	NA	NA	NA	NA	Down	0.000285532	Yes	Down	0.000285532	Yes	Down	0.901041	No
Ophcf2|00144	scaffold_01:996516-1002464	Dead	Fungus	OK	28.6959	50.1679	0.805921	1.69795	0.00095	0.00343587	yes	Serine/threonine-protein kinase domain protein	PF07714|Pkinase_Tyr; PF00072|Response_reg; PF00069|Pkinase;	NA	NA	NA	GO:0035639|purine ribonucleoside triphosphate binding; GO:0006464|cellular protein modification process; GO:0097159|organic cyclic compound binding; GO:0003674|molecular_function; GO:0016772|transferase activity, transferring phosphorus-containing groups; GO:0032553|ribonucleotide binding; GO:0071704|organic substance metabolic process; GO:0009987|cellular process; GO:0016301|kinase activity; GO:…	NA	NA	NA	Ophio5|3793	0.895	3314.63	0	0.9984	49.6486	16.4087	15.8327	PF00069.20|Pkinase;PF00069.20|Pkinase;PF07714.12|Pkinase_Tyr;PF07714.12|Pkinase_Tyr;PF00072.19|Response_reg	GO:0005524|ATP binding;GO:0000156|phosphorelay response regulator activity;GO:0000160|phosphorelay signal transduction system;GO:0004672|protein kinase activity;GO:0006468|protein phosphorylation	NA	NA	NA	NA	NA	NA	NA	Down	0.000285532	Yes	Down	0.000285532	Yes	Down	0.901041	No
Ophcf2|00145	scaffold_01:1005500-1007585	Alive	Dead	OK	208.664	59.0791	-1.82046	-2.6342	5e-05	0.000237974	yes	MFS phosphate transporter	PF00083|Sugar_tr;	NA	NA	NA	GO:0022857|transmembrane transporter activity; GO:0051234|establishment of localization; GO:0005575|cellular_component; GO:0044425|membrane part; GO:0003674|molecular_function; GO:0006810|transport; GO:0008150|biological_process; GO:0031224|intrinsic component of membrane; GO:0016021|integral component of membrane; GO:0051179|localization; GO:0005215|transporter activity; GO:0055085|transmembrane…	NA	NA	9;	Ophio5|3791	0.844	1151.35	0	0.9985	70.7946	99.4976	32.2508	PF00083.19|Sugar_tr;PF00083.19|Sugar_tr	GO:0022857|transmembrane transporter activity;GO:0016021|integral component of membrane;GO:0055085|transmembrane transport	NA	NA	NA	9	NA	NA	NA	Up	0.173746	No	Down	0.000285532	Yes	Down	0.000285532	Yes
Ophcf2|00145	scaffold_01:1005500-1007585	Alive	Fungus	OK	208.664	40.0135	-2.38262	-3.44011	5e-05	0.000237974	yes	MFS phosphate transporter	PF00083|Sugar_tr;	NA	NA	NA	GO:0022857|transmembrane transporter activity; GO:0051234|establishment of localization; GO:0005575|cellular_component; GO:0044425|membrane part; GO:0003674|molecular_function; GO:0006810|transport; GO:0008150|biological_process; GO:0031224|intrinsic component of membrane; GO:0016021|integral component of membrane; GO:0051179|localization; GO:0005215|transporter activity; GO:0055085|transmembrane…	NA	NA	9;	Ophio5|3791	0.844	1151.35	0	0.9985	70.7946	99.4976	32.2508	PF00083.19|Sugar_tr;PF00083.19|Sugar_tr	GO:0022857|transmembrane transporter activity;GO:0016021|integral component of membrane;GO:0055085|transmembrane transport	NA	NA	NA	9	NA	NA	NA	Up	0.173746	No	Down	0.000285532	Yes	Down	0.000285532	Yes
Ophcf2|00145	scaffold_01:1005500-1007585	Dead	Fungus	OK	59.0791	40.0135	-0.56216	-1.28335	0.012	0.0314814	yes	MFS phosphate transporter	PF00083|Sugar_tr;	NA	NA	NA	GO:0022857|transmembrane transporter activity; GO:0051234|establishment of localization; GO:0005575|cellular_component; GO:0044425|membrane part; GO:0003674|molecular_function; GO:0006810|transport; GO:0008150|biological_process; GO:0031224|intrinsic component of membrane; GO:0016021|integral component of membrane; GO:0051179|localization; GO:0005215|transporter activity; GO:0055085|transmembrane…	NA	NA	9;	Ophio5|3791	0.844	1151.35	0	0.9985	70.7946	99.4976	32.2508	PF00083.19|Sugar_tr;PF00083.19|Sugar_tr	GO:0022857|transmembrane transporter activity;GO:0016021|integral component of membrane;GO:0055085|transmembrane transport	NA	NA	NA	9	NA	NA	NA	Up	0.173746	No	Down	0.000285532	Yes	Down	0.000285532	Yes
Ophcf2|00146	scaffold_01:1008263-1012101	Alive	Dead	OK	41.9348	40.8035	-0.0394565	-0.0871652	0.8433	0.899559	no	Zinc finger, C2H2-type/integrase, DNA-binding protein	NA	NA	NA	NA	NA	NA	NA	NA	Ophio5|3790	0.712	1630.92	0	0.9992	53.9737	108.023	84.6826	NA	NA	NA	NA	NA	NA	NA	NA	NA	Up	0.00357329	Yes	Up	0.0628132	No	Down	0.376908	No
Ophcf2|00146	scaffold_01:1008263-1012101	Alive	Fungus	OK	41.9348	39.3774	-0.0907797	-0.202314	0.6875	0.788168	no	Zinc finger, C2H2-type/integrase, DNA-binding protein	NA	NA	NA	NA	NA	NA	NA	NA	Ophio5|3790	0.712	1630.92	0	0.9992	53.9737	108.023	84.6826	NA	NA	NA	NA	NA	NA	NA	NA	NA	Up	0.00357329	Yes	Up	0.0628132	No	Down	0.376908	No
Ophcf2|00146	scaffold_01:1008263-1012101	Dead	Fungus	OK	40.8035	39.3774	-0.0513232	-0.114548	0.824	0.887132	no	Zinc finger, C2H2-type/integrase, DNA-binding protein	NA	NA	NA	NA	NA	NA	NA	NA	Ophio5|3790	0.712	1630.92	0	0.9992	53.9737	108.023	84.6826	NA	NA	NA	NA	NA	NA	NA	NA	NA	Up	0.00357329	Yes	Up	0.0628132	No	Down	0.376908	No
Ophcf2|00147	scaffold_01:1014604-1015912	Alive	Fungus	OK	170.098	190.982	0.167071	0.360622	0.47735	0.61063	no	Protein kinase-like domain protein	PF02958|EcKinase; PF01636|APH; PF01633|Choline_kinase;	NA	NA	NA	NA	NA	NA	NA	Ophio5|6774	0.868	756.133	0	0.9951	128.588	171.74	145.159	PF01633.15|Choline_kinase;PF01636.18|APH;PF02958.15|EcKinase	NA	NA	NA	NA	NA	NA	NA	NA	Up	0.279418	No	Up	0.654399	No	Down	0.54253	No
Ophcf2|00147	scaffold_01:1014604-1015912	Dead	Fungus	OK	152.608	190.982	0.323609	0.703446	0.1633	0.269894	no	Protein kinase-like domain protein	PF02958|EcKinase; PF01636|APH; PF01633|Choline_kinase;	NA	NA	NA	NA	NA	NA	NA	Ophio5|6774	0.868	756.133	0	0.9951	128.588	171.74	145.159	PF01633.15|Choline_kinase;PF01636.18|APH;PF02958.15|EcKinase	NA	NA	NA	NA	NA	NA	NA	NA	Up	0.279418	No	Up	0.654399	No	Down	0.54253	No
Ophcf2|00147	scaffold_01:1014604-1015912	Alive	Dead	OK	170.098	152.608	-0.156537	-0.342007	0.43975	0.5762	no	Protein kinase-like domain protein	PF02958|EcKinase; PF01636|APH; PF01633|Choline_kinase;	NA	NA	NA	NA	NA	NA	NA	Ophio5|6774	0.868	756.133	0	0.9951	128.588	171.74	145.159	PF01633.15|Choline_kinase;PF01636.18|APH;PF02958.15|EcKinase	NA	NA	NA	NA	NA	NA	NA	NA	Up	0.279418	No	Up	0.654399	No	Down	0.54253	No
Ophcf2|00148	scaffold_01:1017154-1019572	Dead	Fungus	OK	33.9102	40.0637	0.240577	0.548018	0.2827	0.412713	no	UPF0171 domain protein	PF03666|NPR3;	NA	NA	NA	NA	NA	NA	NA	Ophio5|6772	0.899	505.368	2.79e-174	0.3504	72.6294	75.2107	64.7758	PF03666.8|NPR3	NA	NA	NA	NA	NA	NA	NA	NA	Up	0.906481	No	Down	0.652675	No	Down	0.548426	No
Ophcf2|00148	scaffold_01:1017154-1019572	Alive	Dead	OK	40.8213	33.9102	-0.267603	-0.604086	0.1746	0.284472	no	UPF0171 domain protein	PF03666|NPR3;	NA	NA	NA	NA	NA	NA	NA	Ophio5|6772	0.899	505.368	2.79e-174	0.3504	72.6294	75.2107	64.7758	PF03666.8|NPR3	NA	NA	NA	NA	NA	NA	NA	NA	Up	0.906481	No	Down	0.652675	No	Down	0.548426	No
Ophcf2|00148	scaffold_01:1017154-1019572	Alive	Fungus	OK	40.8213	40.0637	-0.0270252	-0.061596	0.9001	0.936483	no	UPF0171 domain protein	PF03666|NPR3;	NA	NA	NA	NA	NA	NA	NA	Ophio5|6772	0.899	505.368	2.79e-174	0.3504	72.6294	75.2107	64.7758	PF03666.8|NPR3	NA	NA	NA	NA	NA	NA	NA	NA	Up	0.906481	No	Down	0.652675	No	Down	0.548426	No
Ophcf2|00149	scaffold_01:1020523-1022158	Dead	Fungus	OK	35.3561	34.6179	-0.030441	-0.0664058	0.8941	0.931903	no	bHLH family transcription factor	PF00010|HLH;	NA	NA	Helix-loop-helix;	GO:0003674|molecular_function; GO:0005488|binding; GO:0046983|protein dimerization activity; GO:0005515|protein binding;	NA	NA	NA	Ophio5|6771	0.92	993.801	0	0.9982	48.7218	45.4588	52.1297	PF00010.21|HLH	GO:0046983|protein dimerization activity	NA	NA	bHLH	NA	NA	NA	NA	Down	0.796388	No	Up	0.795651	No	Up	0.588832	No
Ophcf2|00149	scaffold_01:1020523-1022158	Alive	Fungus	OK	25.4758	34.6179	0.442395	0.935062	0.0653	0.129127	no	bHLH family transcription factor	PF00010|HLH;	NA	NA	Helix-loop-helix;	GO:0003674|molecular_function; GO:0005488|binding; GO:0046983|protein dimerization activity; GO:0005515|protein binding;	NA	NA	NA	Ophio5|6771	0.92	993.801	0	0.9982	48.7218	45.4588	52.1297	PF00010.21|HLH	GO:0046983|protein dimerization activity	NA	NA	bHLH	NA	NA	NA	NA	Down	0.796388	No	Up	0.795651	No	Up	0.588832	No
Ophcf2|00149	scaffold_01:1020523-1022158	Alive	Dead	OK	25.4758	35.3561	0.472836	0.999953	0.02235	0.0534764	no	bHLH family transcription factor	PF00010|HLH;	NA	NA	Helix-loop-helix;	GO:0003674|molecular_function; GO:0005488|binding; GO:0046983|protein dimerization activity; GO:0005515|protein binding;	NA	NA	NA	Ophio5|6771	0.92	993.801	0	0.9982	48.7218	45.4588	52.1297	PF00010.21|HLH	GO:0046983|protein dimerization activity	NA	NA	bHLH	NA	NA	NA	NA	Down	0.796388	No	Up	0.795651	No	Up	0.588832	No
Ophcf2|00150	scaffold_01:1022199-1024237	Dead	Fungus	OK	8.42271	12.521	0.571998	0.677297	0.19375	0.308906	no	---NA---	NA	NA	NA	NA	NA	NA	NA	NA	NA	NA	NA	NA	NA	NA	NA	NA	NA	NA	NA	NA	NA	NA	NA	NA	NA	NA	NA	NA	NA	NA	NA	NA	NA	NA
Ophcf2|00150	scaffold_01:1022199-1024237	Alive	Dead	OK	6.38932	8.42271	0.398623	0.443284	0.32925	0.464148	no	---NA---	NA	NA	NA	NA	NA	NA	NA	NA	NA	NA	NA	NA	NA	NA	NA	NA	NA	NA	NA	NA	NA	NA	NA	NA	NA	NA	NA	NA	NA	NA	NA	NA	NA	NA
Ophcf2|00150	scaffold_01:1022199-1024237	Alive	Fungus	OK	6.38932	12.521	0.970621	1.14186	0.0296	0.0676778	no	---NA---	NA	NA	NA	NA	NA	NA	NA	NA	NA	NA	NA	NA	NA	NA	NA	NA	NA	NA	NA	NA	NA	NA	NA	NA	NA	NA	NA	NA	NA	NA	NA	NA	NA	NA
Ophcf2|00151	scaffold_01:1025033-1026610	Alive	Dead	OK	78.5164	102.05	0.378206	0.841187	0.05905	0.119183	no	related to SFT2-suppressor of sed5 ts mutants	PF04178|Got1;	NA	NA	NA	GO:0051234|establishment of localization; GO:0016192|vesicle-mediated transport; GO:0006810|transport; GO:0008150|biological_process; GO:0051179|localization;	NA	NA	4;	Ophio5|627	0.962	416.001	2.8e-149	0.7067	118.541	84.306	103.841	PF04178.7|Got1	GO:0016192|vesicle-mediated transport	NA	NA	NA	4	NA	NA	NA	Down	0.159619	No	Down	0.621283	No	Up	0.424335	No
Ophcf2|00151	scaffold_01:1025033-1026610	Dead	Fungus	OK	102.05	77.3654	-0.399511	-0.889718	0.08505	0.160515	no	related to SFT2-suppressor of sed5 ts mutants	PF04178|Got1;	NA	NA	NA	GO:0051234|establishment of localization; GO:0016192|vesicle-mediated transport; GO:0006810|transport; GO:0008150|biological_process; GO:0051179|localization;	NA	NA	4;	Ophio5|627	0.962	416.001	2.8e-149	0.7067	118.541	84.306	103.841	PF04178.7|Got1	GO:0016192|vesicle-mediated transport	NA	NA	NA	4	NA	NA	NA	Down	0.159619	No	Down	0.621283	No	Up	0.424335	No
Ophcf2|00151	scaffold_01:1025033-1026610	Alive	Fungus	OK	78.5164	77.3654	-0.0213045	-0.0468322	0.9281	0.954109	no	related to SFT2-suppressor of sed5 ts mutants	PF04178|Got1;	NA	NA	NA	GO:0051234|establishment of localization; GO:0016192|vesicle-mediated transport; GO:0006810|transport; GO:0008150|biological_process; GO:0051179|localization;	NA	NA	4;	Ophio5|627	0.962	416.001	2.8e-149	0.7067	118.541	84.306	103.841	PF04178.7|Got1	GO:0016192|vesicle-mediated transport	NA	NA	NA	4	NA	NA	NA	Down	0.159619	No	Down	0.621283	No	Up	0.424335	No
Ophcf2|00152	scaffold_01:1028767-1032774	Alive	Dead	OK	87.9091	114.952	0.386949	0.79806	0.06495	0.128605	no	La domain family	PF05383|La;	NA	NA	NA	NA	NA	NA	NA	Ophio5|628	0.74	1116.29	0	0.8964	156.957	204.991	222.985	PF05383.12|La	NA	NA	NA	NA	NA	NA	NA	NA	Up	0.347339	No	Up	0.206737	No	Up	0.804979	No
Ophcf2|00152	scaffold_01:1028767-1032774	Alive	Fungus	OK	87.9091	105.188	0.258891	0.538844	0.293	0.424019	no	La domain family	PF05383|La;	NA	NA	NA	NA	NA	NA	NA	Ophio5|628	0.74	1116.29	0	0.8964	156.957	204.991	222.985	PF05383.12|La	NA	NA	NA	NA	NA	NA	NA	NA	Up	0.347339	No	Up	0.206737	No	Up	0.804979	No
Ophcf2|00152	scaffold_01:1028767-1032774	Dead	Fungus	OK	114.952	105.188	-0.128058	-0.260766	0.6083	0.724319	no	La domain family	PF05383|La;	NA	NA	NA	NA	NA	NA	NA	Ophio5|628	0.74	1116.29	0	0.8964	156.957	204.991	222.985	PF05383.12|La	NA	NA	NA	NA	NA	NA	NA	NA	Up	0.347339	No	Up	0.206737	No	Up	0.804979	No
Ophcf2|00153	scaffold_01:1033753-1034216	Alive	Fungus	OK	215.756	221.582	0.0384362	0.0762127	0.8807	0.923874	no	hypothetical protein CDD80_7375	NA	Has signal peptide;	Small secreted protein;	NA	NA	NA	NA	NA	NA	NA	NA	NA	NA	NA	NA	NA	NA	NA	NA	NA	NA	NA	NA	NA	NA	NA	NA	NA	NA	NA	NA	NA	NA	NA
Ophcf2|00153	scaffold_01:1033753-1034216	Alive	Dead	OK	215.756	155.122	-0.476002	-0.913647	0.03895	0.0849582	no	hypothetical protein CDD80_7375	NA	Has signal peptide;	Small secreted protein;	NA	NA	NA	NA	NA	NA	NA	NA	NA	NA	NA	NA	NA	NA	NA	NA	NA	NA	NA	NA	NA	NA	NA	NA	NA	NA	NA	NA	NA	NA	NA
Ophcf2|00153	scaffold_01:1033753-1034216	Dead	Fungus	OK	155.122	221.582	0.514438	1.00154	0.05125	0.106397	no	hypothetical protein CDD80_7375	NA	Has signal peptide;	Small secreted protein;	NA	NA	NA	NA	NA	NA	NA	NA	NA	NA	NA	NA	NA	NA	NA	NA	NA	NA	NA	NA	NA	NA	NA	NA	NA	NA	NA	NA	NA	NA	NA
Ophcf2|00154	scaffold_01:1035440-1037510	Alive	Fungus	OK	24.3024	11.594	-1.06773	-2.0775	5e-05	0.000237974	yes	hypothetical protein CDD80_1007	NA	NA	NA	NA	NA	NA	NA	NA	Ophio5|630	0.775	699.123	0	0.9985	71.4881	68.2833	62.893	NA	NA	NA	NA	NA	NA	NA	NA	NA	Down	0.871703	No	Down	0.615694	No	Down	0.759018	No
Ophcf2|00154	scaffold_01:1035440-1037510	Dead	Fungus	OK	26.6173	11.594	-1.19899	-2.35635	5e-05	0.000237974	yes	hypothetical protein CDD80_1007	NA	NA	NA	NA	NA	NA	NA	NA	Ophio5|630	0.775	699.123	0	0.9985	71.4881	68.2833	62.893	NA	NA	NA	NA	NA	NA	NA	NA	NA	Down	0.871703	No	Down	0.615694	No	Down	0.759018	No
Ophcf2|00154	scaffold_01:1035440-1037510	Alive	Dead	OK	24.3024	26.6173	0.131261	0.277279	0.5375	0.664444	no	hypothetical protein CDD80_1007	NA	NA	NA	NA	NA	NA	NA	NA	Ophio5|630	0.775	699.123	0	0.9985	71.4881	68.2833	62.893	NA	NA	NA	NA	NA	NA	NA	NA	NA	Down	0.871703	No	Down	0.615694	No	Down	0.759018	No
Ophcf2|00155	scaffold_01:1038128-1040252	Alive	Dead	OK	33.1434	35.7299	0.108408	0.243853	0.5837	0.704792	no	Pre-mRNA-splicing factor clf1	PF02184|HAT; PF13432|TPR_16; PF14559|TPR_19;	NA	NA	NA	GO:0043170|macromolecule metabolic process; GO:0006139|nucleobase-containing compound metabolic process; GO:0044237|cellular metabolic process; GO:0006807|nitrogen compound metabolic process; GO:0008150|biological_process; GO:0006396|RNA processing; GO:1901360|organic cyclic compound metabolic process; GO:0090304|nucleic acid metabolic process; GO:0071704|organic substance metabolic process; GO:0…	NA	NA	NA	Ophio5|631	0.949	768.074	0	0.5523	24.4341	88.7921	60.0246	PF13428.1|TPR_14;PF02184.11|HAT;PF02184.11|HAT;PF14559.1|TPR_19;PF07719.12|TPR_2	GO:0005622|intracellular;GO:0006396|RNA processing	NA	NA	NA	NA	NA	NA	NA	Up	0.000285532	Yes	Up	0.000285532	Yes	Down	0.113934	No
Ophcf2|00155	scaffold_01:1038128-1040252	Alive	Fungus	OK	33.1434	49.7148	0.584952	1.32766	0.00975	0.0264704	yes	Pre-mRNA-splicing factor clf1	PF02184|HAT; PF13432|TPR_16; PF14559|TPR_19;	NA	NA	NA	GO:0043170|macromolecule metabolic process; GO:0006139|nucleobase-containing compound metabolic process; GO:0044237|cellular metabolic process; GO:0006807|nitrogen compound metabolic process; GO:0008150|biological_process; GO:0006396|RNA processing; GO:1901360|organic cyclic compound metabolic process; GO:0090304|nucleic acid metabolic process; GO:0071704|organic substance metabolic process; GO:0…	NA	NA	NA	Ophio5|631	0.949	768.074	0	0.5523	24.4341	88.7921	60.0246	PF13428.1|TPR_14;PF02184.11|HAT;PF02184.11|HAT;PF14559.1|TPR_19;PF07719.12|TPR_2	GO:0005622|intracellular;GO:0006396|RNA processing	NA	NA	NA	NA	NA	NA	NA	Up	0.000285532	Yes	Up	0.000285532	Yes	Down	0.113934	No
Ophcf2|00155	scaffold_01:1038128-1040252	Dead	Fungus	OK	35.7299	49.7148	0.476544	1.08683	0.0354	0.0784525	no	Pre-mRNA-splicing factor clf1	PF02184|HAT; PF13432|TPR_16; PF14559|TPR_19;	NA	NA	NA	GO:0043170|macromolecule metabolic process; GO:0006139|nucleobase-containing compound metabolic process; GO:0044237|cellular metabolic process; GO:0006807|nitrogen compound metabolic process; GO:0008150|biological_process; GO:0006396|RNA processing; GO:1901360|organic cyclic compound metabolic process; GO:0090304|nucleic acid metabolic process; GO:0071704|organic substance metabolic process; GO:0…	NA	NA	NA	Ophio5|631	0.949	768.074	0	0.5523	24.4341	88.7921	60.0246	PF13428.1|TPR_14;PF02184.11|HAT;PF02184.11|HAT;PF14559.1|TPR_19;PF07719.12|TPR_2	GO:0005622|intracellular;GO:0006396|RNA processing	NA	NA	NA	NA	NA	NA	NA	Up	0.000285532	Yes	Up	0.000285532	Yes	Down	0.113934	No
Ophcf2|00156	scaffold_01:1040760-1042580	Alive	Dead	OK	37.5916	39.4902	0.0710824	0.157666	0.72465	0.815458	no	pre-mRNA splicing factor	PF09785|Prp31_C; PF01798|Nop;	NA	NA	NA	NA	NA	NA	NA	Ophio5|633	0.895	879.396	0	0.8476	33.2082	91.5004	65.7462	PF09785.4|Prp31_C;PF01798.13|Nop;PF08060.8|NOSIC	NA	NA	NA	NA	NA	NA	NA	NA	Up	0.000285532	Yes	Up	0.00121735	No	Down	0.168918	No
Ophcf2|00156	scaffold_01:1040760-1042580	Alive	Fungus	OK	37.5916	29.559	-0.346815	-0.75462	0.1478	0.24928	no	pre-mRNA splicing factor	PF09785|Prp31_C; PF01798|Nop;	NA	NA	NA	NA	NA	NA	NA	Ophio5|633	0.895	879.396	0	0.8476	33.2082	91.5004	65.7462	PF09785.4|Prp31_C;PF01798.13|Nop;PF08060.8|NOSIC	NA	NA	NA	NA	NA	NA	NA	NA	Up	0.000285532	Yes	Up	0.00121735	No	Down	0.168918	No
Ophcf2|00156	scaffold_01:1040760-1042580	Dead	Fungus	OK	39.4902	29.559	-0.417898	-0.915074	0.07685	0.147557	no	pre-mRNA splicing factor	PF09785|Prp31_C; PF01798|Nop;	NA	NA	NA	NA	NA	NA	NA	Ophio5|633	0.895	879.396	0	0.8476	33.2082	91.5004	65.7462	PF09785.4|Prp31_C;PF01798.13|Nop;PF08060.8|NOSIC	NA	NA	NA	NA	NA	NA	NA	NA	Up	0.000285532	Yes	Up	0.00121735	No	Down	0.168918	No
Ophcf2|00157	scaffold_01:1044188-1044836	Alive	Fungus	OK	736.623	1.67262	-8.78268	-9.99542	5e-05	0.000237974	yes	hypothetical protein CDD80_7157	NA	NA	NA	NA	NA	NA	NA	NA	Ophio5|634	0.834	199.519	4.03e-66	0.7037	7.49078	795.881	307.768	NA	NA	NA	NA	NA	NA	NA	NA	NA	Up	0.000285532	Yes	Up	0.000285532	Yes	Down	0.000285532	Yes
Ophcf2|00157	scaffold_01:1044188-1044836	Alive	Dead	OK	736.623	307.844	-1.25873	-2.38185	5e-05	0.000237974	yes	hypothetical protein CDD80_7157	NA	NA	NA	NA	NA	NA	NA	NA	Ophio5|634	0.834	199.519	4.03e-66	0.7037	7.49078	795.881	307.768	NA	NA	NA	NA	NA	NA	NA	NA	NA	Up	0.000285532	Yes	Up	0.000285532	Yes	Down	0.000285532	Yes
Ophcf2|00157	scaffold_01:1044188-1044836	Dead	Fungus	OK	307.844	1.67262	-7.52395	-9.02234	5e-05	0.000237974	yes	hypothetical protein CDD80_7157	NA	NA	NA	NA	NA	NA	NA	NA	Ophio5|634	0.834	199.519	4.03e-66	0.7037	7.49078	795.881	307.768	NA	NA	NA	NA	NA	NA	NA	NA	NA	Up	0.000285532	Yes	Up	0.000285532	Yes	Down	0.000285532	Yes
Ophcf2|00158	scaffold_01:1047528-1048534	Dead	Fungus	OK	134.591	49.3768	-1.44667	-3.15027	5e-05	0.000237974	yes	CCAAT-binding complex subunit HAP2	PF02045|CBFB_NFYA;	NA	NA	CCAAT-binding TF;	GO:0009889|regulation of biosynthetic process; GO:0051252|regulation of RNA metabolic process; GO:0019222|regulation of metabolic process; GO:0003674|molecular_function; GO:0031323|regulation of cellular metabolic process; GO:0010556|regulation of macromolecule biosynthetic process; GO:0140110|transcription regulator activity; GO:0080090|regulation of primary metabolic process; GO:0050789|regulat…	NA	NA	NA	Ophio5|636	0.775	402.134	3.5e-142	0.9022	113.793	226.601	155.945	PF02045.10|CBFB_NFYA	GO:0003700|sequence-specific DNA binding transcription factor activity;GO:0006355|regulation of transcription, DNA-templated	NA	NA	Heteromeric CCAAT factors	NA	NA	NA	NA	Up	0.00300616	No	Up	0.17904	No	Down	0.121058	No
Ophcf2|00158	scaffold_01:1047528-1048534	Alive	Fungus	OK	114.035	49.3768	-1.20757	-2.53985	5e-05	0.000237974	yes	CCAAT-binding complex subunit HAP2	PF02045|CBFB_NFYA;	NA	NA	CCAAT-binding TF;	GO:0009889|regulation of biosynthetic process; GO:0051252|regulation of RNA metabolic process; GO:0019222|regulation of metabolic process; GO:0003674|molecular_function; GO:0031323|regulation of cellular metabolic process; GO:0010556|regulation of macromolecule biosynthetic process; GO:0140110|transcription regulator activity; GO:0080090|regulation of primary metabolic process; GO:0050789|regulat…	NA	NA	NA	Ophio5|636	0.775	402.134	3.5e-142	0.9022	113.793	226.601	155.945	PF02045.10|CBFB_NFYA	GO:0003700|sequence-specific DNA binding transcription factor activity;GO:0006355|regulation of transcription, DNA-templated	NA	NA	Heteromeric CCAAT factors	NA	NA	NA	NA	Up	0.00300616	No	Up	0.17904	No	Down	0.121058	No
Ophcf2|00158	scaffold_01:1047528-1048534	Alive	Dead	OK	114.035	134.591	0.239108	0.528483	0.2268	0.348936	no	CCAAT-binding complex subunit HAP2	PF02045|CBFB_NFYA;	NA	NA	CCAAT-binding TF;	GO:0009889|regulation of biosynthetic process; GO:0051252|regulation of RNA metabolic process; GO:0019222|regulation of metabolic process; GO:0003674|molecular_function; GO:0031323|regulation of cellular metabolic process; GO:0010556|regulation of macromolecule biosynthetic process; GO:0140110|transcription regulator activity; GO:0080090|regulation of primary metabolic process; GO:0050789|regulat…	NA	NA	NA	Ophio5|636	0.775	402.134	3.5e-142	0.9022	113.793	226.601	155.945	PF02045.10|CBFB_NFYA	GO:0003700|sequence-specific DNA binding transcription factor activity;GO:0006355|regulation of transcription, DNA-templated	NA	NA	Heteromeric CCAAT factors	NA	NA	NA	NA	Up	0.00300616	No	Up	0.17904	No	Down	0.121058	No
Ophcf2|00159	scaffold_01:1053138-1054467	Dead	Fungus	OK	102.771	59.7031	-0.783559	-1.78	0.0004	0.00158983	yes	aminoglycoside phosphotransferase	PF02958|EcKinase; PF01636|APH;	NA	NA	NA	NA	NA	NA	NA	Ophio5|639	0.797	628.632	0	0.9436	120.475	109.199	69.2248	PF01636.18|APH;PF02958.15|EcKinase	NA	NA	NA	NA	7	NA	NA	NA	Down	0.760085	No	Down	0.0256201	No	Down	0.0893162	No
Ophcf2|00159	scaffold_01:1053138-1054467	Alive	Fungus	OK	86.5983	59.7031	-0.536532	-1.21855	0.01645	0.0412253	yes	aminoglycoside phosphotransferase	PF02958|EcKinase; PF01636|APH;	NA	NA	NA	NA	NA	NA	NA	Ophio5|639	0.797	628.632	0	0.9436	120.475	109.199	69.2248	PF01636.18|APH;PF02958.15|EcKinase	NA	NA	NA	NA	7	NA	NA	NA	Down	0.760085	No	Down	0.0256201	No	Down	0.0893162	No
Ophcf2|00159	scaffold_01:1053138-1054467	Alive	Dead	OK	86.5983	102.771	0.247027	0.56578	0.1924	0.307253	no	aminoglycoside phosphotransferase	PF02958|EcKinase; PF01636|APH;	NA	NA	NA	NA	NA	NA	NA	Ophio5|639	0.797	628.632	0	0.9436	120.475	109.199	69.2248	PF01636.18|APH;PF02958.15|EcKinase	NA	NA	NA	NA	7	NA	NA	NA	Down	0.760085	No	Down	0.0256201	No	Down	0.0893162	No
Ophcf2|00160	scaffold_01:1055016-1057501	Alive	Dead	OK	45.4906	49.5355	0.122893	0.279245	0.52715	0.655179	no	nonselective cation channel	NA	NA	NA	NA	NA	NA	NA	8;	Ophio5|639	0.883	1056.2	0	0.8182	120.475	109.199	69.2248	PF01636.18|APH;PF02958.15|EcKinase	NA	NA	NA	NA	7	NA	NA	NA	Down	0.760085	No	Down	0.0256201	No	Down	0.0893162	No
Ophcf2|00160	scaffold_01:1055016-1057501	Alive	Fungus	OK	45.4906	31.3818	-0.535639	-1.20446	0.01825	0.0450764	yes	nonselective cation channel	NA	NA	NA	NA	NA	NA	NA	8;	Ophio5|639	0.883	1056.2	0	0.8182	120.475	109.199	69.2248	PF01636.18|APH;PF02958.15|EcKinase	NA	NA	NA	NA	7	NA	NA	NA	Down	0.760085	No	Down	0.0256201	No	Down	0.0893162	No
Ophcf2|00160	scaffold_01:1055016-1057501	Dead	Fungus	OK	49.5355	31.3818	-0.658533	-1.48901	0.0038	0.0116149	yes	nonselective cation channel	NA	NA	NA	NA	NA	NA	NA	8;	Ophio5|639	0.883	1056.2	0	0.8182	120.475	109.199	69.2248	PF01636.18|APH;PF02958.15|EcKinase	NA	NA	NA	NA	7	NA	NA	NA	Down	0.760085	No	Down	0.0256201	No	Down	0.0893162	No
Ophcf2|00161	scaffold_01:1058469-1059231	Dead	Fungus	OK	9.76209	17.1768	0.815202	1.17596	0.026	0.0606882	no	related to methyltransferase S. pombe	NA	NA	NA	NA	NA	NA	NA	NA	Ophio5|640	0.724	357.451	7.55e-125	0.9488	39.2416	33.9537	35.3436	PF13659.1|Methyltransf_26	NA	NA	NA	NA	NA	NA	NA	NA	Down	0.613973	No	Down	0.725757	No	Up	0.904202	No
Ophcf2|00161	scaffold_01:1058469-1059231	Alive	Fungus	OK	9.7739	17.1768	0.813457	1.1775	0.02555	0.0598321	no	related to methyltransferase S. pombe	NA	NA	NA	NA	NA	NA	NA	NA	Ophio5|640	0.724	357.451	7.55e-125	0.9488	39.2416	33.9537	35.3436	PF13659.1|Methyltransf_26	NA	NA	NA	NA	NA	NA	NA	NA	Down	0.613973	No	Down	0.725757	No	Up	0.904202	No
Ophcf2|00161	scaffold_01:1058469-1059231	Alive	Dead	OK	9.7739	9.76209	-0.00174481	-0.00237033	0.99615	0.99763	no	related to methyltransferase S. pombe	NA	NA	NA	NA	NA	NA	NA	NA	Ophio5|640	0.724	357.451	7.55e-125	0.9488	39.2416	33.9537	35.3436	PF13659.1|Methyltransf_26	NA	NA	NA	NA	NA	NA	NA	NA	Down	0.613973	No	Down	0.725757	No	Up	0.904202	No
Ophcf2|00162	scaffold_01:1059547-1060069	Alive	Fungus	OK	359.869	330.684	-0.12202	-0.267767	0.60275	0.719856	no	Small nuclear ribonucleoprotein Sm D1	PF01423|LSM;	NA	NA	NA	NA	NA	NA	NA	Ophio5|641	0.892	180.644	8.19e-61	0.85	216.149	248.681	333.974	PF01423.17|LSM	NA	NA	NA	NA	NA	NA	NA	NA	Up	0.604213	No	Up	0.0592537	No	Up	0.206251	No
Ophcf2|00162	scaffold_01:1059547-1060069	Alive	Dead	OK	359.869	472.815	0.393805	0.881223	0.05095	0.105896	no	Small nuclear ribonucleoprotein Sm D1	PF01423|LSM;	NA	NA	NA	NA	NA	NA	NA	Ophio5|641	0.892	180.644	8.19e-61	0.85	216.149	248.681	333.974	PF01423.17|LSM	NA	NA	NA	NA	NA	NA	NA	NA	Up	0.604213	No	Up	0.0592537	No	Up	0.206251	No
Ophcf2|00162	scaffold_01:1059547-1060069	Dead	Fungus	OK	472.815	330.684	-0.515825	-1.15082	0.027	0.0627237	no	Small nuclear ribonucleoprotein Sm D1	PF01423|LSM;	NA	NA	NA	NA	NA	NA	NA	Ophio5|641	0.892	180.644	8.19e-61	0.85	216.149	248.681	333.974	PF01423.17|LSM	NA	NA	NA	NA	NA	NA	NA	NA	Up	0.604213	No	Up	0.0592537	No	Up	0.206251	No
Ophcf2|00163	scaffold_01:1060750-1063389	Alive	Dead	OK	49.3198	51.0967	0.0510607	0.115829	0.7895	0.863128	no	SCF ubiquitin ligase subunit CulC	PF10557|Cullin_Nedd8; PF00888|Cullin;	NA	NA	NA	GO:0003674|molecular_function; GO:0009056|catabolic process; GO:0043632|modification-dependent macromolecule catabolic process; GO:0071704|organic substance metabolic process; GO:0009987|cellular process; GO:0009057|macromolecule catabolic process; GO:0019941|modification-dependent protein catabolic process; GO:0044389|ubiquitin-like protein ligase binding; GO:0005488|binding; GO:0043170|macromol…	NA	NA	NA	Ophio5|642	0.884	1513.82	0	0.9749	45.2902	69.0112	51.6306	PF00888.17|Cullin;PF10557.4|Cullin_Nedd8	GO:0031625|ubiquitin protein ligase binding;GO:0006511|ubiquitin-dependent protein catabolic process;GO:0031461|cullin-RING ubiquitin ligase complex	NA	NA	NA	NA	NA	NA	NA	Up	0.0653565	No	Up	0.614004	No	Down	0.216255	No
Ophcf2|00163	scaffold_01:1060750-1063389	Dead	Fungus	OK	51.0967	32.8061	-0.639266	-1.45554	0.00445	0.0133593	yes	SCF ubiquitin ligase subunit CulC	PF10557|Cullin_Nedd8; PF00888|Cullin;	NA	NA	NA	GO:0003674|molecular_function; GO:0009056|catabolic process; GO:0043632|modification-dependent macromolecule catabolic process; GO:0071704|organic substance metabolic process; GO:0009987|cellular process; GO:0009057|macromolecule catabolic process; GO:0019941|modification-dependent protein catabolic process; GO:0044389|ubiquitin-like protein ligase binding; GO:0005488|binding; GO:0043170|macromol…	NA	NA	NA	Ophio5|642	0.884	1513.82	0	0.9749	45.2902	69.0112	51.6306	PF00888.17|Cullin;PF10557.4|Cullin_Nedd8	GO:0031625|ubiquitin protein ligase binding;GO:0006511|ubiquitin-dependent protein catabolic process;GO:0031461|cullin-RING ubiquitin ligase complex	NA	NA	NA	NA	NA	NA	NA	Up	0.0653565	No	Up	0.614004	No	Down	0.216255	No
Ophcf2|00163	scaffold_01:1060750-1063389	Alive	Fungus	OK	49.3198	32.8061	-0.588206	-1.33963	0.00845	0.0233525	yes	SCF ubiquitin ligase subunit CulC	PF10557|Cullin_Nedd8; PF00888|Cullin;	NA	NA	NA	GO:0003674|molecular_function; GO:0009056|catabolic process; GO:0043632|modification-dependent macromolecule catabolic process; GO:0071704|organic substance metabolic process; GO:0009987|cellular process; GO:0009057|macromolecule catabolic process; GO:0019941|modification-dependent protein catabolic process; GO:0044389|ubiquitin-like protein ligase binding; GO:0005488|binding; GO:0043170|macromol…	NA	NA	NA	Ophio5|642	0.884	1513.82	0	0.9749	45.2902	69.0112	51.6306	PF00888.17|Cullin;PF10557.4|Cullin_Nedd8	GO:0031625|ubiquitin protein ligase binding;GO:0006511|ubiquitin-dependent protein catabolic process;GO:0031461|cullin-RING ubiquitin ligase complex	NA	NA	NA	NA	NA	NA	NA	Up	0.0653565	No	Up	0.614004	No	Down	0.216255	No
Ophcf2|00164	scaffold_01:1063879-1064763	Dead	Fungus	OK	175.429	374.663	1.09471	2.41787	5e-05	0.000237974	yes	2-keto-4-pentenoate hydratase	PF01557|FAA_hydrolase;	NA	NA	NA	GO:0003824|catalytic activity; GO:0003674|molecular_function;	NA	NA	NA	Ophio5|643	0.74	327.791	5.95e-115	0.892	93.5263	150.751	116.74	PF01557.13|FAA_hydrolase	GO:0003824|catalytic activity;GO:0008152|metabolic process	NA	NA	NA	NA	NA	NA	NA	Up	0.0304649	No	Up	0.345184	No	Down	0.279719	No
Ophcf2|00164	scaffold_01:1063879-1064763	Alive	Dead	OK	267.234	175.429	-0.607215	-1.31603	0.0035	0.0108144	yes	2-keto-4-pentenoate hydratase	PF01557|FAA_hydrolase;	NA	NA	NA	GO:0003824|catalytic activity; GO:0003674|molecular_function;	NA	NA	NA	Ophio5|643	0.74	327.791	5.95e-115	0.892	93.5263	150.751	116.74	PF01557.13|FAA_hydrolase	GO:0003824|catalytic activity;GO:0008152|metabolic process	NA	NA	NA	NA	NA	NA	NA	Up	0.0304649	No	Up	0.345184	No	Down	0.279719	No
Ophcf2|00164	scaffold_01:1063879-1064763	Alive	Fungus	OK	267.234	374.663	0.487493	1.01616	0.05085	0.105739	no	2-keto-4-pentenoate hydratase	PF01557|FAA_hydrolase;	NA	NA	NA	GO:0003824|catalytic activity; GO:0003674|molecular_function;	NA	NA	NA	Ophio5|643	0.74	327.791	5.95e-115	0.892	93.5263	150.751	116.74	PF01557.13|FAA_hydrolase	GO:0003824|catalytic activity;GO:0008152|metabolic process	NA	NA	NA	NA	NA	NA	NA	Up	0.0304649	No	Up	0.345184	No	Down	0.279719	No
Ophcf2|00165	scaffold_01:1064904-1065652	Dead	Fungus	OK	43.2172	60.1418	0.47676	0.851341	0.10415	0.189021	no	3-hydroxyanthranilate 3,4-dioxygenase	PF06052|3-HAO;	NA	NA	NA	GO:0003824|catalytic activity; GO:0000334|3-hydroxyanthranilate 3,4-dioxygenase activity; GO:0005488|binding; GO:0005506|iron ion binding; GO:0051213|dioxygenase activity; GO:0055114|oxidation-reduction process; GO:0046872|metal ion binding; GO:0016491|oxidoreductase activity; GO:0003674|molecular_function; GO:0008150|biological_process; GO:0043167|ion binding; GO:0016701|oxidoreductase activity,…	NA	NA	NA	Ophio5|644	0.785	314.694	1.47e-111	0.9948	196.517	132.299	137.903	PF06052.7|3-HAO	GO:0005506|iron ion binding;GO:0000334|3-hydroxyanthranilate 3,4-dioxygenase activity;GO:0055114|oxidation-reduction process	NA	NA	NA	NA	NA	NA	NA	Down	0.098192	No	Down	0.127188	No	Up	0.893697	No
Ophcf2|00165	scaffold_01:1064904-1065652	Alive	Dead	OK	35.3094	43.2172	0.291553	0.482032	0.2692	0.397544	no	3-hydroxyanthranilate 3,4-dioxygenase	PF06052|3-HAO;	NA	NA	NA	GO:0003824|catalytic activity; GO:0000334|3-hydroxyanthranilate 3,4-dioxygenase activity; GO:0005488|binding; GO:0005506|iron ion binding; GO:0051213|dioxygenase activity; GO:0055114|oxidation-reduction process; GO:0046872|metal ion binding; GO:0016491|oxidoreductase activity; GO:0003674|molecular_function; GO:0008150|biological_process; GO:0043167|ion binding; GO:0016701|oxidoreductase activity,…	NA	NA	NA	Ophio5|644	0.785	314.694	1.47e-111	0.9948	196.517	132.299	137.903	PF06052.7|3-HAO	GO:0005506|iron ion binding;GO:0000334|3-hydroxyanthranilate 3,4-dioxygenase activity;GO:0055114|oxidation-reduction process	NA	NA	NA	NA	NA	NA	NA	Down	0.098192	No	Down	0.127188	No	Up	0.893697	No
Ophcf2|00165	scaffold_01:1064904-1065652	Alive	Fungus	OK	35.3094	60.1418	0.768314	1.30761	0.00985	0.026715	yes	3-hydroxyanthranilate 3,4-dioxygenase	PF06052|3-HAO;	NA	NA	NA	GO:0003824|catalytic activity; GO:0000334|3-hydroxyanthranilate 3,4-dioxygenase activity; GO:0005488|binding; GO:0005506|iron ion binding; GO:0051213|dioxygenase activity; GO:0055114|oxidation-reduction process; GO:0046872|metal ion binding; GO:0016491|oxidoreductase activity; GO:0003674|molecular_function; GO:0008150|biological_process; GO:0043167|ion binding; GO:0016701|oxidoreductase activity,…	NA	NA	NA	Ophio5|644	0.785	314.694	1.47e-111	0.9948	196.517	132.299	137.903	PF06052.7|3-HAO	GO:0005506|iron ion binding;GO:0000334|3-hydroxyanthranilate 3,4-dioxygenase activity;GO:0055114|oxidation-reduction process	NA	NA	NA	NA	NA	NA	NA	Down	0.098192	No	Down	0.127188	No	Up	0.893697	No
Ophcf2|00166	scaffold_01:1066635-1067484	Alive	Fungus	OK	37.9246	155.302	2.03388	3.5122	5e-05	0.000237974	yes	Ctr copper transporter	PF04145|Ctr;	NA	NA	NA	GO:0022890|inorganic cation transmembrane transporter activity; GO:0005575|cellular_component; GO:0044425|membrane part; GO:0003674|molecular_function; GO:0000041|transition metal ion transport; GO:0008324|cation transmembrane transporter activity; GO:0046873|metal ion transmembrane transporter activity; GO:0006811|ion transport; GO:0046915|transition metal ion transmembrane transporter activity;…	NA	NA	3;	Ophio5|2022	0.859	256.144	2.06e-89	0.8808	237.661	135.303	137.792	PF04145.10|Ctr	GO:0005375|copper ion transmembrane transporter activity;GO:0016021|integral component of membrane;GO:0035434|copper ion transmembrane transport	NA	NA	NA	3	NA	NA	NA	Down	0.0170221	No	Down	0.0126885	No	Up	0.95481	No
Ophcf2|00166	scaffold_01:1066635-1067484	Alive	Dead	OK	37.9246	43.8041	0.207933	0.318227	0.46775	0.601524	no	Ctr copper transporter	PF04145|Ctr;	NA	NA	NA	GO:0022890|inorganic cation transmembrane transporter activity; GO:0005575|cellular_component; GO:0044425|membrane part; GO:0003674|molecular_function; GO:0000041|transition metal ion transport; GO:0008324|cation transmembrane transporter activity; GO:0046873|metal ion transmembrane transporter activity; GO:0006811|ion transport; GO:0046915|transition metal ion transmembrane transporter activity;…	NA	NA	3;	Ophio5|2022	0.859	256.144	2.06e-89	0.8808	237.661	135.303	137.792	PF04145.10|Ctr	GO:0005375|copper ion transmembrane transporter activity;GO:0016021|integral component of membrane;GO:0035434|copper ion transmembrane transport	NA	NA	NA	3	NA	NA	NA	Down	0.0170221	No	Down	0.0126885	No	Up	0.95481	No
Ophcf2|00166	scaffold_01:1066635-1067484	Dead	Fungus	OK	43.8041	155.302	1.82594	3.21978	5e-05	0.000237974	yes	Ctr copper transporter	PF04145|Ctr;	NA	NA	NA	GO:0022890|inorganic cation transmembrane transporter activity; GO:0005575|cellular_component; GO:0044425|membrane part; GO:0003674|molecular_function; GO:0000041|transition metal ion transport; GO:0008324|cation transmembrane transporter activity; GO:0046873|metal ion transmembrane transporter activity; GO:0006811|ion transport; GO:0046915|transition metal ion transmembrane transporter activity;…	NA	NA	3;	Ophio5|2022	0.859	256.144	2.06e-89	0.8808	237.661	135.303	137.792	PF04145.10|Ctr	GO:0005375|copper ion transmembrane transporter activity;GO:0016021|integral component of membrane;GO:0035434|copper ion transmembrane transport	NA	NA	NA	3	NA	NA	NA	Down	0.0170221	No	Down	0.0126885	No	Up	0.95481	No
Ophcf2|00167	scaffold_01:1067626-1068904	Dead	Fungus	OK	113.235	97.0596	-0.222379	-0.511842	0.3125	0.445573	no	NUDIX domain-containing protein	PF00293|NUDIX;	NA	NA	NA	GO:0003824|catalytic activity; GO:0003674|molecular_function; GO:0016787|hydrolase activity;	NA	NA	NA	Ophio5|2023	0.807	495.352	1.1e-176	0.9315	144.28	68.8144	64.5187	PF00293.23|NUDIX	GO:0016787|hydrolase activity	NA	NA	NA	NA	NA	NA	NA	Down	0.00143681	Yes	Down	0.000770107	Yes	Down	0.812862	No
Ophcf2|00167	scaffold_01:1067626-1068904	Alive	Dead	OK	115.098	113.235	-0.0235399	-0.054085	0.9005	0.936763	no	NUDIX domain-containing protein	PF00293|NUDIX;	NA	NA	NA	GO:0003824|catalytic activity; GO:0003674|molecular_function; GO:0016787|hydrolase activity;	NA	NA	NA	Ophio5|2023	0.807	495.352	1.1e-176	0.9315	144.28	68.8144	64.5187	PF00293.23|NUDIX	GO:0016787|hydrolase activity	NA	NA	NA	NA	NA	NA	NA	Down	0.00143681	Yes	Down	0.000770107	Yes	Down	0.812862	No
Ophcf2|00167	scaffold_01:1067626-1068904	Alive	Fungus	OK	115.098	97.0596	-0.245919	-0.566339	0.268	0.396323	no	NUDIX domain-containing protein	PF00293|NUDIX;	NA	NA	NA	GO:0003824|catalytic activity; GO:0003674|molecular_function; GO:0016787|hydrolase activity;	NA	NA	NA	Ophio5|2023	0.807	495.352	1.1e-176	0.9315	144.28	68.8144	64.5187	PF00293.23|NUDIX	GO:0016787|hydrolase activity	NA	NA	NA	NA	NA	NA	NA	Down	0.00143681	Yes	Down	0.000770107	Yes	Down	0.812862	No
Ophcf2|00168	scaffold_01:1069240-1070026	Alive	Dead	OK	54.0368	57.4354	0.0879964	0.177711	0.6893	0.789602	no	Peroxisomal coenzyme A diphosphatase 1, peroxisomal	NA	NA	NA	NA	NA	NA	NA	NA	Ophio5|2024	0.676	115.161	1.82e-30	0.3779	30.1171	3.68479	3.54265	NA	NA	NA	NA	NA	NA	NA	NA	NA	Down	0.000285532	Yes	Down	0.000285532	Yes	Down	0.939718	No
Ophcf2|00168	scaffold_01:1069240-1070026	Alive	Fungus	OK	54.0368	54.2863	0.00664598	0.0133913	0.9801	0.988394	no	Peroxisomal coenzyme A diphosphatase 1, peroxisomal	NA	NA	NA	NA	NA	NA	NA	NA	Ophio5|2024	0.676	115.161	1.82e-30	0.3779	30.1171	3.68479	3.54265	NA	NA	NA	NA	NA	NA	NA	NA	NA	Down	0.000285532	Yes	Down	0.000285532	Yes	Down	0.939718	No
Ophcf2|00168	scaffold_01:1069240-1070026	Dead	Fungus	OK	57.4354	54.2863	-0.0813505	-0.164491	0.749	0.833596	no	Peroxisomal coenzyme A diphosphatase 1, peroxisomal	NA	NA	NA	NA	NA	NA	NA	NA	Ophio5|2024	0.676	115.161	1.82e-30	0.3779	30.1171	3.68479	3.54265	NA	NA	NA	NA	NA	NA	NA	NA	NA	Down	0.000285532	Yes	Down	0.000285532	Yes	Down	0.939718	No
Ophcf2|00169	scaffold_01:1071066-1072364	Dead	Fungus	OK	25.2866	35.7606	0.499995	0.997476	0.04615	0.0975554	no	protein-ER retention protein (Erd1)	PF03124|EXS;	NA	NA	NA	GO:0005575|cellular_component; GO:0044425|membrane part; GO:0031224|intrinsic component of membrane; GO:0016021|integral component of membrane;	NA	NA	5;	Ophio5|2025	0.89	732.635	0	0.9685	84.6943	39.8797	36.8112	PF03124.9|EXS	GO:0016021|integral component of membrane	NA	NA	NA	3	NA	NA	NA	Down	0.000997454	Yes	Down	0.000285532	Yes	Down	0.790361	No
Ophcf2|00169	scaffold_01:1071066-1072364	Alive	Fungus	OK	27.1715	35.7606	0.396276	0.782773	0.12775	0.222259	no	protein-ER retention protein (Erd1)	PF03124|EXS;	NA	NA	NA	GO:0005575|cellular_component; GO:0044425|membrane part; GO:0031224|intrinsic component of membrane; GO:0016021|integral component of membrane;	NA	NA	5;	Ophio5|2025	0.89	732.635	0	0.9685	84.6943	39.8797	36.8112	PF03124.9|EXS	GO:0016021|integral component of membrane	NA	NA	NA	3	NA	NA	NA	Down	0.000997454	Yes	Down	0.000285532	Yes	Down	0.790361	No
Ophcf2|00169	scaffold_01:1071066-1072364	Alive	Dead	OK	27.1715	25.2866	-0.103719	-0.197705	0.6477	0.755837	no	protein-ER retention protein (Erd1)	PF03124|EXS;	NA	NA	NA	GO:0005575|cellular_component; GO:0044425|membrane part; GO:0031224|intrinsic component of membrane; GO:0016021|integral component of membrane;	NA	NA	5;	Ophio5|2025	0.89	732.635	0	0.9685	84.6943	39.8797	36.8112	PF03124.9|EXS	GO:0016021|integral component of membrane	NA	NA	NA	3	NA	NA	NA	Down	0.000997454	Yes	Down	0.000285532	Yes	Down	0.790361	No
Ophcf2|00170	scaffold_01:1073397-1074217	Dead	Fungus	OK	40.5599	48.7864	0.266425	0.501805	0.33585	0.47105	no	hypothetical protein CDD80_5661	NA	Has signal peptide;	Small secreted protein;	NA	NA	NA	NA	NA	NA	NA	NA	NA	NA	NA	NA	NA	NA	NA	NA	NA	NA	NA	NA	NA	NA	NA	NA	NA	NA	NA	NA	NA	NA	NA
Ophcf2|00170	scaffold_01:1073397-1074217	Alive	Dead	OK	53.929	40.5599	-0.411008	-0.767935	0.0865	0.162711	no	hypothetical protein CDD80_5661	NA	Has signal peptide;	Small secreted protein;	NA	NA	NA	NA	NA	NA	NA	NA	NA	NA	NA	NA	NA	NA	NA	NA	NA	NA	NA	NA	NA	NA	NA	NA	NA	NA	NA	NA	NA	NA	NA
Ophcf2|00170	scaffold_01:1073397-1074217	Alive	Fungus	OK	53.929	48.7864	-0.144583	-0.273378	0.59195	0.711012	no	hypothetical protein CDD80_5661	NA	Has signal peptide;	Small secreted protein;	NA	NA	NA	NA	NA	NA	NA	NA	NA	NA	NA	NA	NA	NA	NA	NA	NA	NA	NA	NA	NA	NA	NA	NA	NA	NA	NA	NA	NA	NA	NA
Ophcf2|00171	scaffold_01:1074631-1075776	Alive	Fungus	OK	55.7794	52.9271	-0.0757261	-0.163325	0.7487	0.833391	no	RING-1 like protein	PF13923|zf-C3HC4_2; PF13445|zf-RING_UBOX; PF04757|Pex2_Pex12; PF14634|zf-RING_5; PF00097|zf-C3HC4; PF13639|zf-RING_2; PF13920|zf-C3HC4_3;	NA	NA	NA	GO:0005488|binding; GO:0046872|metal ion binding; GO:0003674|molecular_function; GO:0043167|ion binding; GO:0043169|cation binding;	NA	NA	NA	Ophio5|2027	0.635	401.364	1.55e-140	0.9722	118.629	156.843	154.768	PF04757.9|Pex2_Pex12;PF13923.1|zf-C3HC4_2;PF13639.1|zf-RING_2;PF00097.20|zf-C3HC4;PF13920.1|zf-C3HC4_3;PF14634.1|zf-RING_5	GO:0046872|metal ion binding;GO:0008270|zinc ion binding;GO:0005515|protein binding	NA	NA	NA	NA	NA	NA	NA	Up	0.245983	No	Up	0.261761	No	Down	0.964445	No
Ophcf2|00171	scaffold_01:1074631-1075776	Dead	Fungus	OK	56.5535	52.9271	-0.0956091	-0.207106	0.68095	0.782572	no	RING-1 like protein	PF13923|zf-C3HC4_2; PF13445|zf-RING_UBOX; PF04757|Pex2_Pex12; PF14634|zf-RING_5; PF00097|zf-C3HC4; PF13639|zf-RING_2; PF13920|zf-C3HC4_3;	NA	NA	NA	GO:0005488|binding; GO:0046872|metal ion binding; GO:0003674|molecular_function; GO:0043167|ion binding; GO:0043169|cation binding;	NA	NA	NA	Ophio5|2027	0.635	401.364	1.55e-140	0.9722	118.629	156.843	154.768	PF04757.9|Pex2_Pex12;PF13923.1|zf-C3HC4_2;PF13639.1|zf-RING_2;PF00097.20|zf-C3HC4;PF13920.1|zf-C3HC4_3;PF14634.1|zf-RING_5	GO:0046872|metal ion binding;GO:0008270|zinc ion binding;GO:0005515|protein binding	NA	NA	NA	NA	NA	NA	NA	Up	0.245983	No	Up	0.261761	No	Down	0.964445	No
Ophcf2|00171	scaffold_01:1074631-1075776	Alive	Dead	OK	55.7794	56.5535	0.019883	0.0429305	0.92285	0.950712	no	RING-1 like protein	PF13923|zf-C3HC4_2; PF13445|zf-RING_UBOX; PF04757|Pex2_Pex12; PF14634|zf-RING_5; PF00097|zf-C3HC4; PF13639|zf-RING_2; PF13920|zf-C3HC4_3;	NA	NA	NA	GO:0005488|binding; GO:0046872|metal ion binding; GO:0003674|molecular_function; GO:0043167|ion binding; GO:0043169|cation binding;	NA	NA	NA	Ophio5|2027	0.635	401.364	1.55e-140	0.9722	118.629	156.843	154.768	PF04757.9|Pex2_Pex12;PF13923.1|zf-C3HC4_2;PF13639.1|zf-RING_2;PF00097.20|zf-C3HC4;PF13920.1|zf-C3HC4_3;PF14634.1|zf-RING_5	GO:0046872|metal ion binding;GO:0008270|zinc ion binding;GO:0005515|protein binding	NA	NA	NA	NA	NA	NA	NA	Up	0.245983	No	Up	0.261761	No	Down	0.964445	No
Ophcf2|00172	scaffold_01:1076612-1078233	Alive	Dead	OK	45.9091	61.9304	0.431866	0.945666	0.0349	0.0774957	no	Zinc finger domain-containing protein, C2H2, LYAR-type	PF08790|zf-LYAR;	NA	NA	NA	NA	NA	NA	NA	Ophio5|2028	0.809	642.114	0	0.9976	78.8348	129.378	97.3507	PF08790.6|zf-LYAR	NA	NA	NA	NA	NA	NA	NA	NA	Up	0.0357416	No	Up	0.390723	No	Down	0.248738	No
Ophcf2|00172	scaffold_01:1076612-1078233	Alive	Fungus	OK	45.9091	38.9085	-0.238698	-0.505521	0.337	0.472295	no	Zinc finger domain-containing protein, C2H2, LYAR-type	PF08790|zf-LYAR;	NA	NA	NA	NA	NA	NA	NA	Ophio5|2028	0.809	642.114	0	0.9976	78.8348	129.378	97.3507	PF08790.6|zf-LYAR	NA	NA	NA	NA	NA	NA	NA	NA	Up	0.0357416	No	Up	0.390723	No	Down	0.248738	No
Ophcf2|00172	scaffold_01:1076612-1078233	Dead	Fungus	OK	61.9304	38.9085	-0.670564	-1.44209	0.00555	0.0161906	yes	Zinc finger domain-containing protein, C2H2, LYAR-type	PF08790|zf-LYAR;	NA	NA	NA	NA	NA	NA	NA	Ophio5|2028	0.809	642.114	0	0.9976	78.8348	129.378	97.3507	PF08790.6|zf-LYAR	NA	NA	NA	NA	NA	NA	NA	NA	Up	0.0357416	No	Up	0.390723	No	Down	0.248738	No
Ophcf2|00173	scaffold_01:1080610-1081948	Alive	Fungus	OK	136.634	194.706	0.510981	1.1444	0.02785	0.0643312	no	BEM46 family protein	PF12146|Hydrolase_4; PF00561|Abhydrolase_1;	NA	NA	NA	NA	NA	MER017242 - hypothetical ORF Ynl320wp {{Saccharomyces cerevisiae}} (Saccharomyces cerevisiae) [S09.A35]#S09X#; MER017246 - At5g20520 {{Arabidopsis thaliana}}-type peptidase (Arabidopsis thaliana) [S09.A24]#S09X#; MER017240 - FLJ1 putative peptidase (Homo sapiens) [S09.051]#S09X#; MER017371 - Mername-AA197 putative peptidase (Homo sapiens) [S09.055]#S09X#; MER017353 - Mername-AA194 putative peptid…	NA	Ophio5|2029	0.935	606.675	0	0.9537	72.3701	192.086	122.568	PF12695.2|Abhydrolase_5;PF12697.2|Abhydrolase_6;PF05677.7|DUF818;PF03959.8|FSH1	NA	NA	NA	NA	NA	S09X	NA	NA	Up	0.000285532	Yes	Up	0.0184011	No	Down	0.0598485	No
Ophcf2|00173	scaffold_01:1080610-1081948	Dead	Fungus	OK	222.955	194.706	-0.195455	-0.427971	0.4034	0.540926	no	BEM46 family protein	PF12146|Hydrolase_4; PF00561|Abhydrolase_1;	NA	NA	NA	NA	NA	MER017242 - hypothetical ORF Ynl320wp {{Saccharomyces cerevisiae}} (Saccharomyces cerevisiae) [S09.A35]#S09X#; MER017246 - At5g20520 {{Arabidopsis thaliana}}-type peptidase (Arabidopsis thaliana) [S09.A24]#S09X#; MER017240 - FLJ1 putative peptidase (Homo sapiens) [S09.051]#S09X#; MER017371 - Mername-AA197 putative peptidase (Homo sapiens) [S09.055]#S09X#; MER017353 - Mername-AA194 putative peptid…	NA	Ophio5|2029	0.935	606.675	0	0.9537	72.3701	192.086	122.568	PF12695.2|Abhydrolase_5;PF12697.2|Abhydrolase_6;PF05677.7|DUF818;PF03959.8|FSH1	NA	NA	NA	NA	NA	S09X	NA	NA	Up	0.000285532	Yes	Up	0.0184011	No	Down	0.0598485	No
Ophcf2|00173	scaffold_01:1080610-1081948	Alive	Dead	OK	136.634	222.955	0.706436	1.56165	0.00035	0.00140875	yes	BEM46 family protein	PF12146|Hydrolase_4; PF00561|Abhydrolase_1;	NA	NA	NA	NA	NA	MER017242 - hypothetical ORF Ynl320wp {{Saccharomyces cerevisiae}} (Saccharomyces cerevisiae) [S09.A35]#S09X#; MER017246 - At5g20520 {{Arabidopsis thaliana}}-type peptidase (Arabidopsis thaliana) [S09.A24]#S09X#; MER017240 - FLJ1 putative peptidase (Homo sapiens) [S09.051]#S09X#; MER017371 - Mername-AA197 putative peptidase (Homo sapiens) [S09.055]#S09X#; MER017353 - Mername-AA194 putative peptid…	NA	Ophio5|2029	0.935	606.675	0	0.9537	72.3701	192.086	122.568	PF12695.2|Abhydrolase_5;PF12697.2|Abhydrolase_6;PF05677.7|DUF818;PF03959.8|FSH1	NA	NA	NA	NA	NA	S09X	NA	NA	Up	0.000285532	Yes	Up	0.0184011	No	Down	0.0598485	No
Ophcf2|00174	scaffold_01:1082641-1086231	Alive	Dead	OK	29.1544	30.8022	0.0793192	0.181944	0.67885	0.781048	no	Single-stranded nucleic acid binding R3H	PF01424|R3H; PF01422|zf-NF-X1;	NA	NA	Zinc finger, NF-X1-type;	GO:0009889|regulation of biosynthetic process; GO:0005575|cellular_component; GO:0051252|regulation of RNA metabolic process; GO:0097159|organic cyclic compound binding; GO:0019222|regulation of metabolic process; GO:0003674|molecular_function; GO:0031323|regulation of cellular metabolic process; GO:0010556|regulation of macromolecule biosynthetic process; GO:0140110|transcription regulator activ…	NA	NA	NA	Ophio5|2030	0.762	782.711	0	0.4744	18.1384	45.2928	37.0684	PF01424.17|R3H	GO:0003676|nucleic acid binding	NA	NA	NA	NA	NA	NA	NA	Up	0.000535012	Yes	Up	0.00357329	Yes	Down	0.462686	No
Ophcf2|00174	scaffold_01:1082641-1086231	Dead	Fungus	OK	30.8022	34.5163	0.164244	0.375308	0.4587	0.593602	no	Single-stranded nucleic acid binding R3H	PF01424|R3H; PF01422|zf-NF-X1;	NA	NA	Zinc finger, NF-X1-type;	GO:0009889|regulation of biosynthetic process; GO:0005575|cellular_component; GO:0051252|regulation of RNA metabolic process; GO:0097159|organic cyclic compound binding; GO:0019222|regulation of metabolic process; GO:0003674|molecular_function; GO:0031323|regulation of cellular metabolic process; GO:0010556|regulation of macromolecule biosynthetic process; GO:0140110|transcription regulator activ…	NA	NA	NA	Ophio5|2030	0.762	782.711	0	0.4744	18.1384	45.2928	37.0684	PF01424.17|R3H	GO:0003676|nucleic acid binding	NA	NA	NA	NA	NA	NA	NA	Up	0.000535012	Yes	Up	0.00357329	Yes	Down	0.462686	No
Ophcf2|00174	scaffold_01:1082641-1086231	Alive	Fungus	OK	29.1544	34.5163	0.243563	0.55893	0.277	0.406124	no	Single-stranded nucleic acid binding R3H	PF01424|R3H; PF01422|zf-NF-X1;	NA	NA	Zinc finger, NF-X1-type;	GO:0009889|regulation of biosynthetic process; GO:0005575|cellular_component; GO:0051252|regulation of RNA metabolic process; GO:0097159|organic cyclic compound binding; GO:0019222|regulation of metabolic process; GO:0003674|molecular_function; GO:0031323|regulation of cellular metabolic process; GO:0010556|regulation of macromolecule biosynthetic process; GO:0140110|transcription regulator activ…	NA	NA	NA	Ophio5|2030	0.762	782.711	0	0.4744	18.1384	45.2928	37.0684	PF01424.17|R3H	GO:0003676|nucleic acid binding	NA	NA	NA	NA	NA	NA	NA	Up	0.000535012	Yes	Up	0.00357329	Yes	Down	0.462686	No
Ophcf2|00175	scaffold_01:1086852-1087165	Dead	Fungus	OK	46.2585	128.126	1.46977	1.75573	0.0014	0.00482782	yes	---NA---	NA	NA	NA	NA	NA	NA	NA	NA	NA	NA	NA	NA	NA	NA	NA	NA	NA	NA	NA	NA	NA	NA	NA	NA	NA	NA	NA	NA	NA	NA	NA	NA	NA	NA
Ophcf2|00175	scaffold_01:1086852-1087165	Alive	Fungus	OK	41.0625	128.126	1.64167	1.87561	0.0013	0.00453151	yes	---NA---	NA	NA	NA	NA	NA	NA	NA	NA	NA	NA	NA	NA	NA	NA	NA	NA	NA	NA	NA	NA	NA	NA	NA	NA	NA	NA	NA	NA	NA	NA	NA	NA	NA	NA
Ophcf2|00175	scaffold_01:1086852-1087165	Alive	Dead	OK	41.0625	46.2585	0.171897	0.181924	0.6833	0.784854	no	---NA---	NA	NA	NA	NA	NA	NA	NA	NA	NA	NA	NA	NA	NA	NA	NA	NA	NA	NA	NA	NA	NA	NA	NA	NA	NA	NA	NA	NA	NA	NA	NA	NA	NA	NA
Ophcf2|00176	scaffold_01:1087541-1090331	Dead	Fungus	OK	60.4157	40.1652	-0.588978	-1.31947	0.0107	0.0286458	yes	Galactose oxidase, beta-propeller	PF07250|Glyoxal_oxid_N; PF09118|DUF1929; PF01822|WSC;	Has signal peptide;	NA	NA	NA	NA	NA	NA	Ophio5|2032	0.863	1587.39	0	0.9989	0.314943	171.62	96.2854	PF01822.14|WSC;PF01822.14|WSC;PF01822.14|WSC;PF07250.6|Glyoxal_oxid_N;PF09118.6|DUF1929	NA	NA	SignalP: has predicted secretion signal	NA	NA	NA	NA	NA	Up	0.000285532	Yes	Up	0.000285532	Yes	Down	0.0702197	No
Ophcf2|00176	scaffold_01:1087541-1090331	Alive	Dead	OK	58.9587	60.4157	0.0352198	0.0775817	0.8617	0.910898	no	Galactose oxidase, beta-propeller	PF07250|Glyoxal_oxid_N; PF09118|DUF1929; PF01822|WSC;	Has signal peptide;	NA	NA	NA	NA	NA	NA	Ophio5|2032	0.863	1587.39	0	0.9989	0.314943	171.62	96.2854	PF01822.14|WSC;PF01822.14|WSC;PF01822.14|WSC;PF07250.6|Glyoxal_oxid_N;PF09118.6|DUF1929	NA	NA	SignalP: has predicted secretion signal	NA	NA	NA	NA	NA	Up	0.000285532	Yes	Up	0.000285532	Yes	Down	0.0702197	No
Ophcf2|00176	scaffold_01:1087541-1090331	Alive	Fungus	OK	58.9587	40.1652	-0.553758	-1.25389	0.0143	0.0366375	yes	Galactose oxidase, beta-propeller	PF07250|Glyoxal_oxid_N; PF09118|DUF1929; PF01822|WSC;	Has signal peptide;	NA	NA	NA	NA	NA	NA	Ophio5|2032	0.863	1587.39	0	0.9989	0.314943	171.62	96.2854	PF01822.14|WSC;PF01822.14|WSC;PF01822.14|WSC;PF07250.6|Glyoxal_oxid_N;PF09118.6|DUF1929	NA	NA	SignalP: has predicted secretion signal	NA	NA	NA	NA	NA	Up	0.000285532	Yes	Up	0.000285532	Yes	Down	0.0702197	No
Ophcf2|00177	scaffold_01:1090954-1093700	Dead	Fungus	OK	63.172	83.4148	0.401018	0.893984	0.07935	0.151454	no	carboxylesterase family protein	PF03650|MPC; PF00135|COesterase;	Has signal peptide;	NA	NA	GO:0005575|cellular_component; GO:1901475|pyruvate transmembrane transport; GO:0005743|mitochondrial inner membrane; GO:1905039|carboxylic acid transmembrane transport; GO:0015711|organic anion transport; GO:0019866|organelle inner membrane; GO:0006811|ion transport; GO:0015849|organic acid transport; GO:0016020|membrane; GO:0044424|intracellular part; GO:0006848|pyruvate transport; GO:0034220|io…	NA	MER033198 - cholinesterase (Homo sapiens) [S09.980]#S09X#; MER033235 - neuroligin 4, X-linked (Homo sapiens) [S09.988]#S09X#; MER033236 - neuroligin 4, Y-linked (Homo sapiens) [S09.989]#S09X#; MER034726 - carboxylesterase 2 (Mus musculus) [S09.997]#S09X#; MER077885 - carboxylesterase homologue {{Rattus norvegicus}} (Rattus norvegicus) [S09.954]#S09X#; MER034728 - 9030624L02RIK-like protein (Mus m…	NA	Ophio5|2033	0.885	257.299	9.1e-83	0.1857	228.018	237.702	307.554	PF03650.8|MPC	GO:0006850|mitochondrial pyruvate transport;GO:0005743|mitochondrial inner membrane	NA	NA	NA	2	NA	NA	NA	Up	0.882659	No	Up	0.193997	No	Up	0.270269	No
Ophcf2|00177	scaffold_01:1090954-1093700	Alive	Dead	OK	74.3614	63.172	-0.235268	-0.523502	0.2305	0.353267	no	carboxylesterase family protein	PF03650|MPC; PF00135|COesterase;	Has signal peptide;	NA	NA	GO:0005575|cellular_component; GO:1901475|pyruvate transmembrane transport; GO:0005743|mitochondrial inner membrane; GO:1905039|carboxylic acid transmembrane transport; GO:0015711|organic anion transport; GO:0019866|organelle inner membrane; GO:0006811|ion transport; GO:0015849|organic acid transport; GO:0016020|membrane; GO:0044424|intracellular part; GO:0006848|pyruvate transport; GO:0034220|io…	NA	MER033198 - cholinesterase (Homo sapiens) [S09.980]#S09X#; MER033235 - neuroligin 4, X-linked (Homo sapiens) [S09.988]#S09X#; MER033236 - neuroligin 4, Y-linked (Homo sapiens) [S09.989]#S09X#; MER034726 - carboxylesterase 2 (Mus musculus) [S09.997]#S09X#; MER077885 - carboxylesterase homologue {{Rattus norvegicus}} (Rattus norvegicus) [S09.954]#S09X#; MER034728 - 9030624L02RIK-like protein (Mus m…	NA	Ophio5|2033	0.885	257.299	9.1e-83	0.1857	228.018	237.702	307.554	PF03650.8|MPC	GO:0006850|mitochondrial pyruvate transport;GO:0005743|mitochondrial inner membrane	NA	NA	NA	2	NA	NA	NA	Up	0.882659	No	Up	0.193997	No	Up	0.270269	No
Ophcf2|00177	scaffold_01:1090954-1093700	Alive	Fungus	OK	74.3614	83.4148	0.16575	0.363973	0.4687	0.602315	no	carboxylesterase family protein	PF03650|MPC; PF00135|COesterase;	Has signal peptide;	NA	NA	GO:0005575|cellular_component; GO:1901475|pyruvate transmembrane transport; GO:0005743|mitochondrial inner membrane; GO:1905039|carboxylic acid transmembrane transport; GO:0015711|organic anion transport; GO:0019866|organelle inner membrane; GO:0006811|ion transport; GO:0015849|organic acid transport; GO:0016020|membrane; GO:0044424|intracellular part; GO:0006848|pyruvate transport; GO:0034220|io…	NA	MER033198 - cholinesterase (Homo sapiens) [S09.980]#S09X#; MER033235 - neuroligin 4, X-linked (Homo sapiens) [S09.988]#S09X#; MER033236 - neuroligin 4, Y-linked (Homo sapiens) [S09.989]#S09X#; MER034726 - carboxylesterase 2 (Mus musculus) [S09.997]#S09X#; MER077885 - carboxylesterase homologue {{Rattus norvegicus}} (Rattus norvegicus) [S09.954]#S09X#; MER034728 - 9030624L02RIK-like protein (Mus m…	NA	Ophio5|2033	0.885	257.299	9.1e-83	0.1857	228.018	237.702	307.554	PF03650.8|MPC	GO:0006850|mitochondrial pyruvate transport;GO:0005743|mitochondrial inner membrane	NA	NA	NA	2	NA	NA	NA	Up	0.882659	No	Up	0.193997	No	Up	0.270269	No
Ophcf2|00178	scaffold_01:1095789-1099884	Alive	Fungus	OK	78.5161	118.966	0.599489	1.06225	0.03665	0.0808241	no	Pyruvate carboxylase	PF00289|Biotin_carb_N; PF00682|HMGL-like; PF00364|Biotin_lipoyl; PF13533|Biotin_lipoyl_2; PF02222|ATP-grasp; PF02785|Biotin_carb_C; PF02655|ATP-grasp_3; PF02436|PYC_OADA; PF07478|Dala_Dala_lig_C; PF02786|CPSase_L_D2;	NA	NA	NA	GO:0035639|purine ribonucleoside triphosphate binding; GO:0016874|ligase activity; GO:0097159|organic cyclic compound binding; GO:0003674|molecular_function; GO:0032553|ribonucleotide binding; GO:0016881|acid-amino acid ligase activity; GO:0008144|drug binding; GO:0005488|binding; GO:0008716|D-alanine-D-alanine ligase activity; GO:0043167|ion binding; GO:0000166|nucleotide binding; GO:0043168|ani…	NA	NA	NA	Ophio5|2035	0.976	2400.16	0	0.9992	89.2745	102.814	51.0151	PF02786.12|CPSase_L_D2;PF02436.13|PYC_OADA;PF00289.17|CPSase_L_chain;PF02785.14|Biotin_carb_C;PF00682.14|HMGL-like;PF13535.1|ATP-grasp_4;PF00364.17|Biotin_lipoyl;PF13533.1|Biotin_lipoyl_2;PF07478.8|Dala_Dala_lig_C;PF02222.17|ATP-grasp;PF08443.6|RimK;PF02655.9|ATP-grasp_3	GO:0008152|metabolic process;GO:0008716|D-alanine-D-alanine ligase activity;GO:0005524|ATP binding;GO:0046872|metal ion binding;GO:0003824|catalytic activity;GO:0016874|ligase activity	NA	NA	NA	NA	NA	NA	NA	Up	0.668976	No	Down	0.0160748	No	Down	0.014841	Yes
Ophcf2|00178	scaffold_01:1095789-1099884	Dead	Fungus	OK	45.0191	118.966	1.40194	2.79379	5e-05	0.000237974	yes	Pyruvate carboxylase	PF00289|Biotin_carb_N; PF00682|HMGL-like; PF00364|Biotin_lipoyl; PF13533|Biotin_lipoyl_2; PF02222|ATP-grasp; PF02785|Biotin_carb_C; PF02655|ATP-grasp_3; PF02436|PYC_OADA; PF07478|Dala_Dala_lig_C; PF02786|CPSase_L_D2;	NA	NA	NA	GO:0035639|purine ribonucleoside triphosphate binding; GO:0016874|ligase activity; GO:0097159|organic cyclic compound binding; GO:0003674|molecular_function; GO:0032553|ribonucleotide binding; GO:0016881|acid-amino acid ligase activity; GO:0008144|drug binding; GO:0005488|binding; GO:0008716|D-alanine-D-alanine ligase activity; GO:0043167|ion binding; GO:0000166|nucleotide binding; GO:0043168|ani…	NA	NA	NA	Ophio5|2035	0.976	2400.16	0	0.9992	89.2745	102.814	51.0151	PF02786.12|CPSase_L_D2;PF02436.13|PYC_OADA;PF00289.17|CPSase_L_chain;PF02785.14|Biotin_carb_C;PF00682.14|HMGL-like;PF13535.1|ATP-grasp_4;PF00364.17|Biotin_lipoyl;PF13533.1|Biotin_lipoyl_2;PF07478.8|Dala_Dala_lig_C;PF02222.17|ATP-grasp;PF08443.6|RimK;PF02655.9|ATP-grasp_3	GO:0008152|metabolic process;GO:0008716|D-alanine-D-alanine ligase activity;GO:0005524|ATP binding;GO:0046872|metal ion binding;GO:0003824|catalytic activity;GO:0016874|ligase activity	NA	NA	NA	NA	NA	NA	NA	Up	0.668976	No	Down	0.0160748	No	Down	0.014841	Yes
Ophcf2|00178	scaffold_01:1095789-1099884	Alive	Dead	OK	78.5161	45.0191	-0.80245	-1.46957	0.00095	0.00343587	yes	Pyruvate carboxylase	PF00289|Biotin_carb_N; PF00682|HMGL-like; PF00364|Biotin_lipoyl; PF13533|Biotin_lipoyl_2; PF02222|ATP-grasp; PF02785|Biotin_carb_C; PF02655|ATP-grasp_3; PF02436|PYC_OADA; PF07478|Dala_Dala_lig_C; PF02786|CPSase_L_D2;	NA	NA	NA	GO:0035639|purine ribonucleoside triphosphate binding; GO:0016874|ligase activity; GO:0097159|organic cyclic compound binding; GO:0003674|molecular_function; GO:0032553|ribonucleotide binding; GO:0016881|acid-amino acid ligase activity; GO:0008144|drug binding; GO:0005488|binding; GO:0008716|D-alanine-D-alanine ligase activity; GO:0043167|ion binding; GO:0000166|nucleotide binding; GO:0043168|ani…	NA	NA	NA	Ophio5|2035	0.976	2400.16	0	0.9992	89.2745	102.814	51.0151	PF02786.12|CPSase_L_D2;PF02436.13|PYC_OADA;PF00289.17|CPSase_L_chain;PF02785.14|Biotin_carb_C;PF00682.14|HMGL-like;PF13535.1|ATP-grasp_4;PF00364.17|Biotin_lipoyl;PF13533.1|Biotin_lipoyl_2;PF07478.8|Dala_Dala_lig_C;PF02222.17|ATP-grasp;PF08443.6|RimK;PF02655.9|ATP-grasp_3	GO:0008152|metabolic process;GO:0008716|D-alanine-D-alanine ligase activity;GO:0005524|ATP binding;GO:0046872|metal ion binding;GO:0003824|catalytic activity;GO:0016874|ligase activity	NA	NA	NA	NA	NA	NA	NA	Up	0.668976	No	Down	0.0160748	No	Down	0.014841	Yes
Ophcf2|00179	scaffold_01:1100181-1100517	Alive	Fungus	OK	549.829	617.055	0.166417	0.29718	0.5562	0.680385	no	predicted protein	NA	Has signal peptide;	Small secreted protein;	NA	NA	NA	NA	NA	Ophio5|2036	0.478	67.3958	4.39e-17	0.7246	0	0	0	NA	NA	NA	SignalP: has predicted secretion signal; SSP: small secreted protein	NA	NA	NA	NA	NA	=	1	No	=	1	No	=	1	No
Ophcf2|00179	scaffold_01:1100181-1100517	Alive	Dead	OK	549.829	457.913	-0.263909	-0.455562	0.2939	0.425037	no	predicted protein	NA	Has signal peptide;	Small secreted protein;	NA	NA	NA	NA	NA	Ophio5|2036	0.478	67.3958	4.39e-17	0.7246	0	0	0	NA	NA	NA	SignalP: has predicted secretion signal; SSP: small secreted protein	NA	NA	NA	NA	NA	=	1	No	=	1	No	=	1	No
Ophcf2|00179	scaffold_01:1100181-1100517	Dead	Fungus	OK	457.913	617.055	0.430326	0.755402	0.13525	0.232272	no	predicted protein	NA	Has signal peptide;	Small secreted protein;	NA	NA	NA	NA	NA	Ophio5|2036	0.478	67.3958	4.39e-17	0.7246	0	0	0	NA	NA	NA	SignalP: has predicted secretion signal; SSP: small secreted protein	NA	NA	NA	NA	NA	=	1	No	=	1	No	=	1	No
Ophcf2|00180	scaffold_01:1102336-1102998	Alive	Fungus	OK	75.7761	45.2755	-0.743012	-1.34582	0.01	0.0270606	yes	pyruvate carboxylase	NA	NA	NA	NA	NA	NA	NA	NA	Ophio5|8173	0.839	271.552	1.05e-94	0.9836	118.786	113.493	85.3743	NA	NA	NA	NA	NA	NA	NA	NA	NA	Down	0.884779	No	Down	0.194847	No	Down	0.269382	No
Ophcf2|00180	scaffold_01:1102336-1102998	Alive	Dead	OK	75.7761	86.4279	0.189753	0.365519	0.4219	0.559645	no	pyruvate carboxylase	NA	NA	NA	NA	NA	NA	NA	NA	Ophio5|8173	0.839	271.552	1.05e-94	0.9836	118.786	113.493	85.3743	NA	NA	NA	NA	NA	NA	NA	NA	NA	Down	0.884779	No	Down	0.194847	No	Down	0.269382	No
Ophcf2|00180	scaffold_01:1102336-1102998	Dead	Fungus	OK	86.4279	45.2755	-0.932765	-1.71448	0.00115	0.00406648	yes	pyruvate carboxylase	NA	NA	NA	NA	NA	NA	NA	NA	Ophio5|8173	0.839	271.552	1.05e-94	0.9836	118.786	113.493	85.3743	NA	NA	NA	NA	NA	NA	NA	NA	NA	Down	0.884779	No	Down	0.194847	No	Down	0.269382	No
Ophcf2|00181	scaffold_01:1104207-1104739	Dead	Fungus	OK	168.569	262.506	0.639014	1.41197	0.008	0.0222859	yes	Protein RCR2	PF12273|RCR;	NA	NA	NA	NA	NA	NA	1;	Ophio5|8175	0.667	144.436	2.12e-45	0.8961	746.974	122.849	124.843	PF12273.3|RCR	NA	NA	NA	NA	1	NA	NA	NA	Down	0.000285532	Yes	Down	0.000285532	Yes	Up	0.96032	No
Ophcf2|00181	scaffold_01:1104207-1104739	Alive	Dead	OK	127.084	168.569	0.407555	0.822257	0.0666	0.131133	no	Protein RCR2	PF12273|RCR;	NA	NA	NA	NA	NA	NA	1;	Ophio5|8175	0.667	144.436	2.12e-45	0.8961	746.974	122.849	124.843	PF12273.3|RCR	NA	NA	NA	NA	1	NA	NA	NA	Down	0.000285532	Yes	Down	0.000285532	Yes	Up	0.96032	No
Ophcf2|00181	scaffold_01:1104207-1104739	Alive	Fungus	OK	127.084	262.506	1.04657	2.15493	5e-05	0.000237974	yes	Protein RCR2	PF12273|RCR;	NA	NA	NA	NA	NA	NA	1;	Ophio5|8175	0.667	144.436	2.12e-45	0.8961	746.974	122.849	124.843	PF12273.3|RCR	NA	NA	NA	NA	1	NA	NA	NA	Down	0.000285532	Yes	Down	0.000285532	Yes	Up	0.96032	No
Ophcf2|00182	scaffold_01:1106292-1107618	Dead	Fungus	OK	255.701	176.053	-0.538446	-1.11483	0.03055	0.0694669	no	fibroin-3 related protein	NA	NA	NA	NA	NA	NA	NA	1;	Ophio5|8176	0.673	343.584	3.49e-116	0.7464	60.5792	41.1684	40.7923	NA	NA	NA	NA	NA	1	NA	NA	NA	Down	0.0936435	No	Down	0.0928759	No	Down	0.977193	No
Ophcf2|00182	scaffold_01:1106292-1107618	Alive	Fungus	OK	196.17	176.053	-0.156093	-0.327633	0.5191	0.648374	no	fibroin-3 related protein	NA	NA	NA	NA	NA	NA	NA	1;	Ophio5|8176	0.673	343.584	3.49e-116	0.7464	60.5792	41.1684	40.7923	NA	NA	NA	NA	NA	1	NA	NA	NA	Down	0.0936435	No	Down	0.0928759	No	Down	0.977193	No
Ophcf2|00182	scaffold_01:1106292-1107618	Alive	Dead	OK	196.17	255.701	0.382352	0.768139	0.0819	0.155674	no	fibroin-3 related protein	NA	NA	NA	NA	NA	NA	NA	1;	Ophio5|8176	0.673	343.584	3.49e-116	0.7464	60.5792	41.1684	40.7923	NA	NA	NA	NA	NA	1	NA	NA	NA	Down	0.0936435	No	Down	0.0928759	No	Down	0.977193	No
Ophcf2|00183	scaffold_01:1108696-1109890	Dead	Fungus	OK	57.7175	29.2538	-0.980385	-2.01436	0.0001	0.000453723	yes	vaculolar membrane protein	PF12400|STIMATE;	NA	NA	NA	NA	NA	NA	6;	Ophio5|1793	0.714	246.514	8.84e-82	0.5066	35.3945	51.6905	49.4646	PF12400.3|DUF3661	NA	NA	NA	NA	2	NA	NA	NA	Up	0.203842	No	Up	0.269429	No	Down	0.905903	No
Ophcf2|00183	scaffold_01:1108696-1109890	Alive	Dead	OK	57.9536	57.7175	-0.0058899	-0.0128732	0.9784	0.987649	no	vaculolar membrane protein	PF12400|STIMATE;	NA	NA	NA	NA	NA	NA	6;	Ophio5|1793	0.714	246.514	8.84e-82	0.5066	35.3945	51.6905	49.4646	PF12400.3|DUF3661	NA	NA	NA	NA	2	NA	NA	NA	Up	0.203842	No	Up	0.269429	No	Down	0.905903	No
Ophcf2|00183	scaffold_01:1108696-1109890	Alive	Fungus	OK	57.9536	29.2538	-0.986275	-2.02147	0.0001	0.000453723	yes	vaculolar membrane protein	PF12400|STIMATE;	NA	NA	NA	NA	NA	NA	6;	Ophio5|1793	0.714	246.514	8.84e-82	0.5066	35.3945	51.6905	49.4646	PF12400.3|DUF3661	NA	NA	NA	NA	2	NA	NA	NA	Up	0.203842	No	Up	0.269429	No	Down	0.905903	No
Ophcf2|00184	scaffold_01:1110607-1111510	Dead	Fungus	OK	114.169	136.077	0.253253	0.579726	0.2589	0.385908	no	superoxide dismutase	PF02777|Sod_Fe_C;	NA	NA	NA	GO:0003824|catalytic activity; GO:0005488|binding; GO:0055114|oxidation-reduction process; GO:0044237|cellular metabolic process; GO:0046872|metal ion binding; GO:0004784|superoxide dismutase activity; GO:0016491|oxidoreductase activity; GO:0003674|molecular_function; GO:0008150|biological_process; GO:0043167|ion binding; GO:0043169|cation binding; GO:0016721|oxidoreductase activity, acting on su…	NA	NA	NA	Ophio5|7243	0.577	335.495	1.17e-116	0.9752	153.059	140.072	181.104	NA	NA	NA	NA	NA	NA	NA	NA	NA	Down	0.746507	No	Up	0.50083	No	Up	0.275209	No
Ophcf2|00184	scaffold_01:1110607-1111510	Alive	Fungus	OK	101.885	136.077	0.417478	0.938805	0.06875	0.134543	no	superoxide dismutase	PF02777|Sod_Fe_C;	NA	NA	NA	GO:0003824|catalytic activity; GO:0005488|binding; GO:0055114|oxidation-reduction process; GO:0044237|cellular metabolic process; GO:0046872|metal ion binding; GO:0004784|superoxide dismutase activity; GO:0016491|oxidoreductase activity; GO:0003674|molecular_function; GO:0008150|biological_process; GO:0043167|ion binding; GO:0043169|cation binding; GO:0016721|oxidoreductase activity, acting on su…	NA	NA	NA	Ophio5|7243	0.577	335.495	1.17e-116	0.9752	153.059	140.072	181.104	NA	NA	NA	NA	NA	NA	NA	NA	NA	Down	0.746507	No	Up	0.50083	No	Up	0.275209	No
Ophcf2|00184	scaffold_01:1110607-1111510	Alive	Dead	OK	101.885	114.169	0.164225	0.366222	0.41915	0.556853	no	superoxide dismutase	PF02777|Sod_Fe_C;	NA	NA	NA	GO:0003824|catalytic activity; GO:0005488|binding; GO:0055114|oxidation-reduction process; GO:0044237|cellular metabolic process; GO:0046872|metal ion binding; GO:0004784|superoxide dismutase activity; GO:0016491|oxidoreductase activity; GO:0003674|molecular_function; GO:0008150|biological_process; GO:0043167|ion binding; GO:0043169|cation binding; GO:0016721|oxidoreductase activity, acting on su…	NA	NA	NA	Ophio5|7243	0.577	335.495	1.17e-116	0.9752	153.059	140.072	181.104	NA	NA	NA	NA	NA	NA	NA	NA	NA	Down	0.746507	No	Up	0.50083	No	Up	0.275209	No
Ophcf2|00185	scaffold_01:1111952-1114367	Alive	Dead	OK	413.205	174.023	-1.24758	-2.08704	5e-05	0.000237974	yes	SAM and PH domain-containing protein	PF07647|SAM_2;	NA	NA	NA	GO:0003674|molecular_function; GO:0005488|binding; GO:0005515|protein binding;	NA	NA	NA	Ophio5|7242	0.819	1274.23	0	0.9975	26.963	510.845	386.299	PF07647.12|SAM_2	GO:0005515|protein binding	NA	NA	NA	NA	NA	NA	NA	Up	0.000285532	Yes	Up	0.000285532	Yes	Down	0.461549	No
Ophcf2|00185	scaffold_01:1111952-1114367	Alive	Fungus	OK	413.205	5.81605	-6.15067	-9.67816	5e-05	0.000237974	yes	SAM and PH domain-containing protein	PF07647|SAM_2;	NA	NA	NA	GO:0003674|molecular_function; GO:0005488|binding; GO:0005515|protein binding;	NA	NA	NA	Ophio5|7242	0.819	1274.23	0	0.9975	26.963	510.845	386.299	PF07647.12|SAM_2	GO:0005515|protein binding	NA	NA	NA	NA	NA	NA	NA	Up	0.000285532	Yes	Up	0.000285532	Yes	Down	0.461549	No
Ophcf2|00185	scaffold_01:1111952-1114367	Dead	Fungus	OK	174.023	5.81605	-4.9031	-8.67363	5e-05	0.000237974	yes	SAM and PH domain-containing protein	PF07647|SAM_2;	NA	NA	NA	GO:0003674|molecular_function; GO:0005488|binding; GO:0005515|protein binding;	NA	NA	NA	Ophio5|7242	0.819	1274.23	0	0.9975	26.963	510.845	386.299	PF07647.12|SAM_2	GO:0005515|protein binding	NA	NA	NA	NA	NA	NA	NA	Up	0.000285532	Yes	Up	0.000285532	Yes	Down	0.461549	No
Ophcf2|00186	scaffold_01:1116421-1116837	Alive	Fungus	OK	6.72181	7.40535	0.139719	0.110678	0.83725	0.895763	no	---NA---	NA	NA	NA	NA	NA	NA	NA	NA	NA	NA	NA	NA	NA	NA	NA	NA	NA	NA	NA	NA	NA	NA	NA	NA	NA	NA	NA	NA	NA	NA	NA	NA	NA	NA
Ophcf2|00186	scaffold_01:1116421-1116837	Dead	Fungus	OK	6.61042	7.40535	0.163827	0.128632	0.80805	0.875641	no	---NA---	NA	NA	NA	NA	NA	NA	NA	NA	NA	NA	NA	NA	NA	NA	NA	NA	NA	NA	NA	NA	NA	NA	NA	NA	NA	NA	NA	NA	NA	NA	NA	NA	NA	NA
Ophcf2|00186	scaffold_01:1116421-1116837	Alive	Dead	OK	6.72181	6.61042	-0.0241083	-0.0184914	0.9681	0.981385	no	---NA---	NA	NA	NA	NA	NA	NA	NA	NA	NA	NA	NA	NA	NA	NA	NA	NA	NA	NA	NA	NA	NA	NA	NA	NA	NA	NA	NA	NA	NA	NA	NA	NA	NA	NA
Ophcf2|00187	scaffold_01:1120899-1122853	Alive	Fungus	OK	554.278	0.0926952	-12.5458	-8.46426	0.00305	0.00959436	yes	Transcriptional regulatory protein pro-1	PF11951|Fungal_trans_2;	NA	NA	Fungal Specific TF;	NA	NA	NA	NA	Ophio5|356	0.844	1060.06	0	0.9983	1.28428	635.647	439.459	PF11951.3|Fungal_trans_2;PF00172.13|Zn_clus	GO:0000981|sequence-specific DNA binding RNA polymerase II transcription factor activity;GO:0008270|zinc ion binding;GO:0006355|regulation of transcription, DNA-templated;GO:0005634|nucleus	NA	NA	Zn2Cys6	NA	NA	NA	NA	Up	0.000285532	Yes	Up	0.000285532	Yes	Down	0.309482	No
Ophcf2|00187	scaffold_01:1120899-1122853	Dead	Fungus	OK	237.216	0.0926952	-11.3214	-7.73906	0.00305	0.00959436	yes	Transcriptional regulatory protein pro-1	PF11951|Fungal_trans_2;	NA	NA	Fungal Specific TF;	NA	NA	NA	NA	Ophio5|356	0.844	1060.06	0	0.9983	1.28428	635.647	439.459	PF11951.3|Fungal_trans_2;PF00172.13|Zn_clus	GO:0000981|sequence-specific DNA binding RNA polymerase II transcription factor activity;GO:0008270|zinc ion binding;GO:0006355|regulation of transcription, DNA-templated;GO:0005634|nucleus	NA	NA	Zn2Cys6	NA	NA	NA	NA	Up	0.000285532	Yes	Up	0.000285532	Yes	Down	0.309482	No
Ophcf2|00187	scaffold_01:1120899-1122853	Alive	Dead	OK	554.278	237.216	-1.22441	-2.13281	5e-05	0.000237974	yes	Transcriptional regulatory protein pro-1	PF11951|Fungal_trans_2;	NA	NA	Fungal Specific TF;	NA	NA	NA	NA	Ophio5|356	0.844	1060.06	0	0.9983	1.28428	635.647	439.459	PF11951.3|Fungal_trans_2;PF00172.13|Zn_clus	GO:0000981|sequence-specific DNA binding RNA polymerase II transcription factor activity;GO:0008270|zinc ion binding;GO:0006355|regulation of transcription, DNA-templated;GO:0005634|nucleus	NA	NA	Zn2Cys6	NA	NA	NA	NA	Up	0.000285532	Yes	Up	0.000285532	Yes	Down	0.309482	No
Ophcf2|00188	scaffold_01:1124248-1124979	Dead	Fungus	OK	97.8947	18.0857	-2.43638	-4.11913	5e-05	0.000237974	yes	hypothetical protein CDD80_7365	NA	Has signal peptide;	Small secreted protein;	NA	NA	NA	NA	NA	Ophio5|4394	0.482	74.3294	3.43e-16	0.415	3.74152	415.155	186.441	NA	NA	NA	SignalP: has predicted secretion signal	NA	1	NA	NA	NA	Up	0.000285532	Yes	Up	0.000285532	Yes	Down	0.00164691	Yes
Ophcf2|00188	scaffold_01:1124248-1124979	Alive	Dead	OK	271.316	97.8947	-1.47067	-3.07786	5e-05	0.000237974	yes	hypothetical protein CDD80_7365	NA	Has signal peptide;	Small secreted protein;	NA	NA	NA	NA	NA	Ophio5|4394	0.482	74.3294	3.43e-16	0.415	3.74152	415.155	186.441	NA	NA	NA	SignalP: has predicted secretion signal	NA	1	NA	NA	NA	Up	0.000285532	Yes	Up	0.000285532	Yes	Down	0.00164691	Yes
Ophcf2|00188	scaffold_01:1124248-1124979	Alive	Fungus	OK	271.316	18.0857	-3.90705	-6.63783	5e-05	0.000237974	yes	hypothetical protein CDD80_7365	NA	Has signal peptide;	Small secreted protein;	NA	NA	NA	NA	NA	Ophio5|4394	0.482	74.3294	3.43e-16	0.415	3.74152	415.155	186.441	NA	NA	NA	SignalP: has predicted secretion signal	NA	1	NA	NA	NA	Up	0.000285532	Yes	Up	0.000285532	Yes	Down	0.00164691	Yes
Ophcf2|00189	scaffold_01:1125560-1129159	Dead	Fungus	OK	47.3629	22.9822	-1.04324	-2.35348	5e-05	0.000237974	yes	F-box domain protein	NA	NA	NA	NA	NA	NA	NA	NA	Ophio5|4393	0.681	1315.83	0	0.9782	22.0984	52.8522	40.1182	NA	NA	NA	NA	NA	NA	NA	NA	NA	Up	0.000285532	Yes	Up	0.00549944	No	Down	0.248452	No
Ophcf2|00189	scaffold_01:1125560-1129159	Alive	Fungus	OK	36.3856	22.9822	-0.662853	-1.51156	0.00385	0.0117494	yes	F-box domain protein	NA	NA	NA	NA	NA	NA	NA	NA	Ophio5|4393	0.681	1315.83	0	0.9782	22.0984	52.8522	40.1182	NA	NA	NA	NA	NA	NA	NA	NA	NA	Up	0.000285532	Yes	Up	0.00549944	No	Down	0.248452	No
Ophcf2|00189	scaffold_01:1125560-1129159	Alive	Dead	OK	36.3856	47.3629	0.38039	0.853721	0.0556	0.113688	no	F-box domain protein	NA	NA	NA	NA	NA	NA	NA	NA	Ophio5|4393	0.681	1315.83	0	0.9782	22.0984	52.8522	40.1182	NA	NA	NA	NA	NA	NA	NA	NA	NA	Up	0.000285532	Yes	Up	0.00549944	No	Down	0.248452	No
Ophcf2|00190	scaffold_01:1130624-1133604	Dead	Fungus	OK	2.6266	0.532384	-2.30265	-2.78378	5e-05	0.000237974	yes	hypothetical protein CDD80_3433	NA	NA	NA	NA	NA	NA	NA	NA	Ophio5|4392	0.672	1188.71	0	0.9978	14.0673	4.24398	1.68871	NA	NA	NA	NA	NA	NA	NA	NA	NA	Down	0.000285532	Yes	Down	0.000285532	Yes	Down	0.00429103	Yes
Ophcf2|00190	scaffold_01:1130624-1133604	Alive	Fungus	OK	1.66743	0.532384	-1.64709	-1.90621	0.0006	0.00228657	yes	hypothetical protein CDD80_3433	NA	NA	NA	NA	NA	NA	NA	NA	Ophio5|4392	0.672	1188.71	0	0.9978	14.0673	4.24398	1.68871	NA	NA	NA	NA	NA	NA	NA	NA	NA	Down	0.000285532	Yes	Down	0.000285532	Yes	Down	0.00429103	Yes
Ophcf2|00190	scaffold_01:1130624-1133604	Alive	Dead	OK	1.66743	2.6266	0.655565	0.887653	0.0486	0.101896	no	hypothetical protein CDD80_3433	NA	NA	NA	NA	NA	NA	NA	NA	Ophio5|4392	0.672	1188.71	0	0.9978	14.0673	4.24398	1.68871	NA	NA	NA	NA	NA	NA	NA	NA	NA	Down	0.000285532	Yes	Down	0.000285532	Yes	Down	0.00429103	Yes
Ophcf2|00191	scaffold_01:1136365-1136827	Alive	Fungus	OK	41.4326	22.1776	-0.901661	-1.29638	0.01305	0.033902	yes	hypothetical protein CDD80_3431	NA	NA	NA	NA	NA	NA	NA	NA	Ophio5|4391	0.556	148.673	6.43e-47	0.8442	36.7494	71.9968	29.9769	NA	NA	NA	NA	NA	NA	NA	NA	NA	Up	0.0209229	No	Down	0.577124	No	Down	0.00481026	Yes
Ophcf2|00191	scaffold_01:1136365-1136827	Dead	Fungus	OK	63.5102	22.1776	-1.51788	-2.28703	5e-05	0.000237974	yes	hypothetical protein CDD80_3431	NA	NA	NA	NA	NA	NA	NA	NA	Ophio5|4391	0.556	148.673	6.43e-47	0.8442	36.7494	71.9968	29.9769	NA	NA	NA	NA	NA	NA	NA	NA	NA	Up	0.0209229	No	Down	0.577124	No	Down	0.00481026	Yes
Ophcf2|00191	scaffold_01:1136365-1136827	Alive	Dead	OK	41.4326	63.5102	0.616222	0.999962	0.0259	0.0604941	no	hypothetical protein CDD80_3431	NA	NA	NA	NA	NA	NA	NA	NA	Ophio5|4391	0.556	148.673	6.43e-47	0.8442	36.7494	71.9968	29.9769	NA	NA	NA	NA	NA	NA	NA	NA	NA	Up	0.0209229	No	Down	0.577124	No	Down	0.00481026	Yes
Ophcf2|00192	scaffold_01:1137078-1138878	Alive	Fungus	OK	43.8886	53.3232	0.280919	0.63975	0.21155	0.330782	no	Vacuolar fusion protein MON1	PF03164|Mon1;	NA	NA	NA	NA	NA	NA	NA	Ophio5|4390	0.862	952.199	0	0.9983	24.0436	33.12	28.9374	PF03164.9|Mon1	NA	NA	NA	NA	NA	NA	NA	NA	Up	0.177883	No	Up	0.475565	No	Down	0.60653	No
Ophcf2|00192	scaffold_01:1137078-1138878	Alive	Dead	OK	43.8886	52.9585	0.271017	0.61664	0.1647	0.271853	no	Vacuolar fusion protein MON1	PF03164|Mon1;	NA	NA	NA	NA	NA	NA	NA	Ophio5|4390	0.862	952.199	0	0.9983	24.0436	33.12	28.9374	PF03164.9|Mon1	NA	NA	NA	NA	NA	NA	NA	NA	Up	0.177883	No	Up	0.475565	No	Down	0.60653	No
Ophcf2|00192	scaffold_01:1137078-1138878	Dead	Fungus	OK	52.9585	53.3232	0.00990226	0.0227726	0.96715	0.980837	no	Vacuolar fusion protein MON1	PF03164|Mon1;	NA	NA	NA	NA	NA	NA	NA	Ophio5|4390	0.862	952.199	0	0.9983	24.0436	33.12	28.9374	PF03164.9|Mon1	NA	NA	NA	NA	NA	NA	NA	NA	Up	0.177883	No	Up	0.475565	No	Down	0.60653	No
Ophcf2|00193	scaffold_01:1139509-1145361	Alive	Fungus	OK	12.5991	17.9315	0.509181	1.15489	0.02285	0.0544733	no	Protein dopey	PF04118|Dopey_N;	NA	NA	NA	NA	NA	NA	NA	Ophio5|4389	0.83	3004.54	0	0.9795	21.5854	21.5135	16.3694	PF04118.9|Dopey_N	NA	NA	NA	NA	NA	NA	NA	NA	Down	0.991521	No	Down	0.244874	No	Down	0.249826	No
Ophcf2|00193	scaffold_01:1139509-1145361	Alive	Dead	OK	12.5991	10.1951	-0.305444	-0.672256	0.1243	0.217291	no	Protein dopey	PF04118|Dopey_N;	NA	NA	NA	NA	NA	NA	NA	Ophio5|4389	0.83	3004.54	0	0.9795	21.5854	21.5135	16.3694	PF04118.9|Dopey_N	NA	NA	NA	NA	NA	NA	NA	NA	Down	0.991521	No	Down	0.244874	No	Down	0.249826	No
Ophcf2|00193	scaffold_01:1139509-1145361	Dead	Fungus	OK	10.1951	17.9315	0.814625	1.8182	0.00035	0.00140875	yes	Protein dopey	PF04118|Dopey_N;	NA	NA	NA	NA	NA	NA	NA	Ophio5|4389	0.83	3004.54	0	0.9795	21.5854	21.5135	16.3694	PF04118.9|Dopey_N	NA	NA	NA	NA	NA	NA	NA	NA	Down	0.991521	No	Down	0.244874	No	Down	0.249826	No
Ophcf2|00194	scaffold_01:1145983-1148428	Dead	Fungus	OK	506.229	74.4225	-2.76598	-5.2761	5e-05	0.000237974	yes	negative acting factor	NA	NA	NA	NA	NA	NA	NA	NA	Ophio5|5172	0.682	756.518	0	0.9952	31.4922	439.687	122.558	PF00172.13|Zn_clus	GO:0000981|sequence-specific DNA binding RNA polymerase II transcription factor activity;GO:0008270|zinc ion binding;GO:0006355|regulation of transcription, DNA-templated;GO:0005634|nucleus	NA	NA	Zn2Cys6	NA	NA	NA	NA	Up	0.000285532	Yes	Up	0.000285532	Yes	Down	0.000285532	Yes
Ophcf2|00194	scaffold_01:1145983-1148428	Alive	Dead	OK	1082.76	506.229	-1.09685	-1.60511	0.00055	0.00211659	yes	negative acting factor	NA	NA	NA	NA	NA	NA	NA	NA	Ophio5|5172	0.682	756.518	0	0.9952	31.4922	439.687	122.558	PF00172.13|Zn_clus	GO:0000981|sequence-specific DNA binding RNA polymerase II transcription factor activity;GO:0008270|zinc ion binding;GO:0006355|regulation of transcription, DNA-templated;GO:0005634|nucleus	NA	NA	Zn2Cys6	NA	NA	NA	NA	Up	0.000285532	Yes	Up	0.000285532	Yes	Down	0.000285532	Yes
Ophcf2|00194	scaffold_01:1145983-1148428	Alive	Fungus	OK	1082.76	74.4225	-3.86283	-6.21334	5e-05	0.000237974	yes	negative acting factor	NA	NA	NA	NA	NA	NA	NA	NA	Ophio5|5172	0.682	756.518	0	0.9952	31.4922	439.687	122.558	PF00172.13|Zn_clus	GO:0000981|sequence-specific DNA binding RNA polymerase II transcription factor activity;GO:0008270|zinc ion binding;GO:0006355|regulation of transcription, DNA-templated;GO:0005634|nucleus	NA	NA	Zn2Cys6	NA	NA	NA	NA	Up	0.000285532	Yes	Up	0.000285532	Yes	Down	0.000285532	Yes
Ophcf2|00195	scaffold_01:1151464-1153072	Alive	Fungus	OK	435.264	60.3111	-2.85139	-5.39989	5e-05	0.000237974	yes	glycosyltransferase family 31	PF02434|Fringe;	NA	NA	NA	GO:0003824|catalytic activity; GO:0005575|cellular_component; GO:0016740|transferase activity; GO:0003674|molecular_function; GO:0016757|transferase activity, transferring glycosyl groups; GO:0016020|membrane;	NA	NA	1;	Ophio5|6547	0.775	652.129	0	0.8927	69.771	120.114	38.6152	PF00024.21|PAN_1;PF02434.11|Fringe	GO:0016757|transferase activity, transferring glycosyl groups;GO:0016020|membrane	NA	NA	NA	1	NA	NA	NA	Up	0.015801	No	Down	0.0049881	No	Down	0.000285532	Yes
Ophcf2|00195	scaffold_01:1151464-1153072	Alive	Dead	OK	435.264	423.738	-0.038716	-0.0665604	0.87885	0.922966	no	glycosyltransferase family 31	PF02434|Fringe;	NA	NA	NA	GO:0003824|catalytic activity; GO:0005575|cellular_component; GO:0016740|transferase activity; GO:0003674|molecular_function; GO:0016757|transferase activity, transferring glycosyl groups; GO:0016020|membrane;	NA	NA	1;	Ophio5|6547	0.775	652.129	0	0.8927	69.771	120.114	38.6152	PF00024.21|PAN_1;PF02434.11|Fringe	GO:0016757|transferase activity, transferring glycosyl groups;GO:0016020|membrane	NA	NA	NA	1	NA	NA	NA	Up	0.015801	No	Down	0.0049881	No	Down	0.000285532	Yes
Ophcf2|00195	scaffold_01:1151464-1153072	Dead	Fungus	OK	423.738	60.3111	-2.81268	-5.68766	5e-05	0.000237974	yes	glycosyltransferase family 31	PF02434|Fringe;	NA	NA	NA	GO:0003824|catalytic activity; GO:0005575|cellular_component; GO:0016740|transferase activity; GO:0003674|molecular_function; GO:0016757|transferase activity, transferring glycosyl groups; GO:0016020|membrane;	NA	NA	1;	Ophio5|6547	0.775	652.129	0	0.8927	69.771	120.114	38.6152	PF00024.21|PAN_1;PF02434.11|Fringe	GO:0016757|transferase activity, transferring glycosyl groups;GO:0016020|membrane	NA	NA	NA	1	NA	NA	NA	Up	0.015801	No	Down	0.0049881	No	Down	0.000285532	Yes
Ophcf2|00196	scaffold_01:1154046-1155798	Alive	Dead	OK	63.3537	66.4199	0.0681862	0.154145	0.72815	0.818244	no	Ubiquitin carboxyl-terminal hydrolase 16	PF00443|UCH;	NA	NA	NA	GO:0006464|cellular protein modification process; GO:0003674|molecular_function; GO:0019783|ubiquitin-like protein-specific protease activity; GO:0071704|organic substance metabolic process; GO:0009987|cellular process; GO:0044267|cellular protein metabolic process; GO:0043412|macromolecule modification; GO:0016579|protein deubiquitination; GO:0140096|catalytic activity, acting on a protein; GO:0…	NA	MER093050 - family C19 non-peptidase homologues (Aspergillus niger) [C19.UNW]#C19#; MER005855 - ubiquitin carboxy-terminal hydrolase 16 {{Saccharomyces cerevisiae}} (Saccharomyces cerevisiae) [C19.A18]#C19#; MER006258 - ubiquitin-specific peptidase 21 (Homo sapiens) [C19.034]#C19#; MER001878 - putative ubiquitin carboxyl-terminal hydrolase ybl067c {{Saccharomyces cerevisiae}} (Saccharomyces cerev…	1;	Ophio5|6548	0.862	981.474	0	0.9983	55.9949	134.858	56.4909	PF00443.24|UCH;PF13423.1|UCH_1	GO:0006511|ubiquitin-dependent protein catabolic process	NA	NA	NA	1	C19	NA	NA	Up	0.000535012	Yes	Up	0.976658	No	Down	0.000285532	Yes
Ophcf2|00196	scaffold_01:1154046-1155798	Alive	Fungus	OK	63.3537	49.3022	-0.361775	-0.821391	0.10415	0.189021	no	Ubiquitin carboxyl-terminal hydrolase 16	PF00443|UCH;	NA	NA	NA	GO:0006464|cellular protein modification process; GO:0003674|molecular_function; GO:0019783|ubiquitin-like protein-specific protease activity; GO:0071704|organic substance metabolic process; GO:0009987|cellular process; GO:0044267|cellular protein metabolic process; GO:0043412|macromolecule modification; GO:0016579|protein deubiquitination; GO:0140096|catalytic activity, acting on a protein; GO:0…	NA	MER093050 - family C19 non-peptidase homologues (Aspergillus niger) [C19.UNW]#C19#; MER005855 - ubiquitin carboxy-terminal hydrolase 16 {{Saccharomyces cerevisiae}} (Saccharomyces cerevisiae) [C19.A18]#C19#; MER006258 - ubiquitin-specific peptidase 21 (Homo sapiens) [C19.034]#C19#; MER001878 - putative ubiquitin carboxyl-terminal hydrolase ybl067c {{Saccharomyces cerevisiae}} (Saccharomyces cerev…	1;	Ophio5|6548	0.862	981.474	0	0.9983	55.9949	134.858	56.4909	PF00443.24|UCH;PF13423.1|UCH_1	GO:0006511|ubiquitin-dependent protein catabolic process	NA	NA	NA	1	C19	NA	NA	Up	0.000535012	Yes	Up	0.976658	No	Down	0.000285532	Yes
Ophcf2|00196	scaffold_01:1154046-1155798	Dead	Fungus	OK	66.4199	49.3022	-0.429962	-0.98142	0.05615	0.114628	no	Ubiquitin carboxyl-terminal hydrolase 16	PF00443|UCH;	NA	NA	NA	GO:0006464|cellular protein modification process; GO:0003674|molecular_function; GO:0019783|ubiquitin-like protein-specific protease activity; GO:0071704|organic substance metabolic process; GO:0009987|cellular process; GO:0044267|cellular protein metabolic process; GO:0043412|macromolecule modification; GO:0016579|protein deubiquitination; GO:0140096|catalytic activity, acting on a protein; GO:0…	NA	MER093050 - family C19 non-peptidase homologues (Aspergillus niger) [C19.UNW]#C19#; MER005855 - ubiquitin carboxy-terminal hydrolase 16 {{Saccharomyces cerevisiae}} (Saccharomyces cerevisiae) [C19.A18]#C19#; MER006258 - ubiquitin-specific peptidase 21 (Homo sapiens) [C19.034]#C19#; MER001878 - putative ubiquitin carboxyl-terminal hydrolase ybl067c {{Saccharomyces cerevisiae}} (Saccharomyces cerev…	1;	Ophio5|6548	0.862	981.474	0	0.9983	55.9949	134.858	56.4909	PF00443.24|UCH;PF13423.1|UCH_1	GO:0006511|ubiquitin-dependent protein catabolic process	NA	NA	NA	1	C19	NA	NA	Up	0.000535012	Yes	Up	0.976658	No	Down	0.000285532	Yes
Ophcf2|00197	scaffold_01:1156427-1157498	Alive	Dead	OK	52.652	65.0497	0.305053	0.663149	0.1379	0.236015	no	F-box-like domain-containing protein	NA	NA	NA	NA	NA	NA	NA	NA	Ophio5|6549	0.798	535.028	0	0.9524	46.1091	46.0512	33.5993	NA	NA	NA	NA	NA	NA	NA	NA	NA	Down	0.996084	No	Down	0.221234	No	Down	0.232245	No
Ophcf2|00197	scaffold_01:1156427-1157498	Alive	Fungus	OK	52.652	51.2724	-0.0383043	-0.082493	0.8719	0.917812	no	F-box-like domain-containing protein	NA	NA	NA	NA	NA	NA	NA	NA	Ophio5|6549	0.798	535.028	0	0.9524	46.1091	46.0512	33.5993	NA	NA	NA	NA	NA	NA	NA	NA	NA	Down	0.996084	No	Down	0.221234	No	Down	0.232245	No
Ophcf2|00197	scaffold_01:1156427-1157498	Dead	Fungus	OK	65.0497	51.2724	-0.343358	-0.745742	0.1478	0.24928	no	F-box-like domain-containing protein	NA	NA	NA	NA	NA	NA	NA	NA	Ophio5|6549	0.798	535.028	0	0.9524	46.1091	46.0512	33.5993	NA	NA	NA	NA	NA	NA	NA	NA	NA	Down	0.996084	No	Down	0.221234	No	Down	0.232245	No
Ophcf2|00198	scaffold_01:1157897-1162092	Dead	Fungus	OK	46.9905	31.4737	-0.57822	-1.28102	0.0133	0.0344685	yes	Autophagy-related protein 11	PF10377|ATG11;	NA	NA	NA	NA	NA	NA	NA	Ophio5|6550	0.824	2234.53	0	0.9993	20.8279	15.686	13.2543	PF10377.4|ATG11	NA	NA	NA	NA	NA	NA	NA	NA	Down	0.23855	No	Down	0.0459802	No	Down	0.515758	No
Ophcf2|00198	scaffold_01:1157897-1162092	Alive	Fungus	OK	47.5165	31.4737	-0.59428	-1.27917	0.01435	0.0367481	yes	Autophagy-related protein 11	PF10377|ATG11;	NA	NA	NA	NA	NA	NA	NA	Ophio5|6550	0.824	2234.53	0	0.9993	20.8279	15.686	13.2543	PF10377.4|ATG11	NA	NA	NA	NA	NA	NA	NA	NA	Down	0.23855	No	Down	0.0459802	No	Down	0.515758	No
Ophcf2|00198	scaffold_01:1157897-1162092	Alive	Dead	OK	47.5165	46.9905	-0.01606	-0.0337812	0.9397	0.961908	no	Autophagy-related protein 11	PF10377|ATG11;	NA	NA	NA	NA	NA	NA	NA	Ophio5|6550	0.824	2234.53	0	0.9993	20.8279	15.686	13.2543	PF10377.4|ATG11	NA	NA	NA	NA	NA	NA	NA	NA	Down	0.23855	No	Down	0.0459802	No	Down	0.515758	No
Ophcf2|00199	scaffold_01:1162545-1163347	Alive	Dead	OK	92.834	90.4323	-0.0378158	-0.0803122	0.8561	0.907379	no	Centromere protein Cenp-H	PF05837|CENP-H;	NA	NA	NA	GO:0005575|cellular_component; GO:0006996|organelle organization; GO:0009987|cellular process; GO:0044424|intracellular part; GO:0016043|cellular component organization; GO:0032991|protein-containing complex; GO:0043933|protein-containing complex subunit organization; GO:0043229|intracellular organelle; GO:0043228|non-membrane-bounded organelle; GO:0000776|kinetochore; GO:0051382|kinetochore asse…	NA	NA	NA	Ophio5|6551	0.758	330.487	9.22e-117	0.9733	59.9284	40.4538	31.276	PF05837.7|CENP-H	GO:0051382|kinetochore assembly;GO:0000776|kinetochore	NA	NA	NA	NA	NA	NA	NA	Down	0.1912	No	Down	0.0182655	No	Down	0.437131	No
Ophcf2|00199	scaffold_01:1162545-1163347	Alive	Fungus	OK	92.834	86.5909	-0.100439	-0.21286	0.6746	0.777428	no	Centromere protein Cenp-H	PF05837|CENP-H;	NA	NA	NA	GO:0005575|cellular_component; GO:0006996|organelle organization; GO:0009987|cellular process; GO:0044424|intracellular part; GO:0016043|cellular component organization; GO:0032991|protein-containing complex; GO:0043933|protein-containing complex subunit organization; GO:0043229|intracellular organelle; GO:0043228|non-membrane-bounded organelle; GO:0000776|kinetochore; GO:0051382|kinetochore asse…	NA	NA	NA	Ophio5|6551	0.758	330.487	9.22e-117	0.9733	59.9284	40.4538	31.276	PF05837.7|CENP-H	GO:0051382|kinetochore assembly;GO:0000776|kinetochore	NA	NA	NA	NA	NA	NA	NA	Down	0.1912	No	Down	0.0182655	No	Down	0.437131	No
Ophcf2|00199	scaffold_01:1162545-1163347	Dead	Fungus	OK	90.4323	86.5909	-0.0626227	-0.132923	0.7942	0.866334	no	Centromere protein Cenp-H	PF05837|CENP-H;	NA	NA	NA	GO:0005575|cellular_component; GO:0006996|organelle organization; GO:0009987|cellular process; GO:0044424|intracellular part; GO:0016043|cellular component organization; GO:0032991|protein-containing complex; GO:0043933|protein-containing complex subunit organization; GO:0043229|intracellular organelle; GO:0043228|non-membrane-bounded organelle; GO:0000776|kinetochore; GO:0051382|kinetochore asse…	NA	NA	NA	Ophio5|6551	0.758	330.487	9.22e-117	0.9733	59.9284	40.4538	31.276	PF05837.7|CENP-H	GO:0051382|kinetochore assembly;GO:0000776|kinetochore	NA	NA	NA	NA	NA	NA	NA	Down	0.1912	No	Down	0.0182655	No	Down	0.437131	No
Ophcf2|00200	scaffold_01:1163626-1163899	Alive	Dead	OK	269.217	252.86	-0.0904337	-0.163927	0.7056	0.80121	no	---NA---	NA	Has signal peptide;	Small secreted protein;	NA	NA	NA	NA	1;	NA	NA	NA	NA	NA	NA	NA	NA	NA	NA	NA	NA	NA	NA	NA	NA	NA	NA	NA	NA	NA	NA	NA	NA	NA	NA
Ophcf2|00200	scaffold_01:1163626-1163899	Dead	Fungus	OK	252.86	227.65	-0.151517	-0.271083	0.58745	0.707656	no	---NA---	NA	Has signal peptide;	Small secreted protein;	NA	NA	NA	NA	1;	NA	NA	NA	NA	NA	NA	NA	NA	NA	NA	NA	NA	NA	NA	NA	NA	NA	NA	NA	NA	NA	NA	NA	NA	NA	NA
Ophcf2|00200	scaffold_01:1163626-1163899	Alive	Fungus	OK	269.217	227.65	-0.241951	-0.432942	0.3897	0.52678	no	---NA---	NA	Has signal peptide;	Small secreted protein;	NA	NA	NA	NA	1;	NA	NA	NA	NA	NA	NA	NA	NA	NA	NA	NA	NA	NA	NA	NA	NA	NA	NA	NA	NA	NA	NA	NA	NA	NA	NA
Ophcf2|00201	scaffold_01:1168306-1169034	Alive	Fungus	OK	2209.78	894.122	-1.30536	-2.40017	5e-05	0.000237974	yes	structure-specific recognition protein 1	PF00505|HMG_box; PF09011|HMG_box_2;	Has signal peptide;	Small secreted protein;	HMG;	NA	NA	NA	NA	Ophio5|6554	0.844	130.568	3.79e-39	0.5	722.172	1052.72	820.964	PF00505.14|HMG_box	NA	NA	SignalP: has predicted secretion signal; SSP: small secreted protein	HMG	NA	NA	NA	NA	Up	0.21181	No	Up	0.671428	No	Down	0.419499	No
Ophcf2|00201	scaffold_01:1168306-1169034	Dead	Fungus	OK	2369.71	894.122	-1.40617	-2.71842	5e-05	0.000237974	yes	structure-specific recognition protein 1	PF00505|HMG_box; PF09011|HMG_box_2;	Has signal peptide;	Small secreted protein;	HMG;	NA	NA	NA	NA	Ophio5|6554	0.844	130.568	3.79e-39	0.5	722.172	1052.72	820.964	PF00505.14|HMG_box	NA	NA	SignalP: has predicted secretion signal; SSP: small secreted protein	HMG	NA	NA	NA	NA	Up	0.21181	No	Up	0.671428	No	Down	0.419499	No
Ophcf2|00201	scaffold_01:1168306-1169034	Alive	Dead	OK	2209.78	2369.71	0.10081	0.173741	0.6922	0.791579	no	structure-specific recognition protein 1	PF00505|HMG_box; PF09011|HMG_box_2;	Has signal peptide;	Small secreted protein;	HMG;	NA	NA	NA	NA	Ophio5|6554	0.844	130.568	3.79e-39	0.5	722.172	1052.72	820.964	PF00505.14|HMG_box	NA	NA	SignalP: has predicted secretion signal; SSP: small secreted protein	HMG	NA	NA	NA	NA	Up	0.21181	No	Up	0.671428	No	Down	0.419499	No
Ophcf2|00202	scaffold_01:1169750-1172090	Alive	Fungus	OK	297.634	42.4764	-2.8088	-5.44457	5e-05	0.000237974	yes	predicted protein	NA	NA	NA	NA	NA	NA	NA	3;	Ophio5|6555	0.579	469.544	1.61e-163	0.8624	42.6968	217.618	41.2688	NA	NA	NA	NA	NA	NA	NA	NA	NA	Up	0.000285532	Yes	Down	0.910669	No	Down	0.000285532	Yes
Ophcf2|00202	scaffold_01:1169750-1172090	Alive	Dead	OK	297.634	151.769	-0.971662	-1.84528	0.0001	0.000453723	yes	predicted protein	NA	NA	NA	NA	NA	NA	NA	3;	Ophio5|6555	0.579	469.544	1.61e-163	0.8624	42.6968	217.618	41.2688	NA	NA	NA	NA	NA	NA	NA	NA	NA	Up	0.000285532	Yes	Down	0.910669	No	Down	0.000285532	Yes
Ophcf2|00202	scaffold_01:1169750-1172090	Dead	Fungus	OK	151.769	42.4764	-1.83714	-3.94214	5e-05	0.000237974	yes	predicted protein	NA	NA	NA	NA	NA	NA	NA	3;	Ophio5|6555	0.579	469.544	1.61e-163	0.8624	42.6968	217.618	41.2688	NA	NA	NA	NA	NA	NA	NA	NA	NA	Up	0.000285532	Yes	Down	0.910669	No	Down	0.000285532	Yes
Ophcf2|00203	scaffold_01:1172336-1174249	Alive	Dead	OK	176.059	273.311	0.634486	1.2376	0.00605	0.017444	yes	phosphoglucomutase	PF00408|PGM_PMM_IV; PF02878|PGM_PMM_I; PF02880|PGM_PMM_III; PF02879|PGM_PMM_II;	NA	NA	NA	GO:0003824|catalytic activity; GO:0003674|molecular_function; GO:0016853|isomerase activity; GO:0008150|biological_process; GO:0016866|intramolecular transferase activity; GO:0005975|carbohydrate metabolic process; GO:0071704|organic substance metabolic process; GO:0016868|intramolecular transferase activity, phosphotransferases; GO:0044238|primary metabolic process; GO:0008152|metabolic process;	NA	NA	NA	Ophio5|6556	0.917	1042.34	0	0.9982	221.52	293.103	171.034	PF02878.11|PGM_PMM_I;PF02880.11|PGM_PMM_III;PF02879.11|PGM_PMM_II;PF00408.15|PGM_PMM_IV	GO:0005975|carbohydrate metabolic process;GO:0016868|intramolecular transferase activity, phosphotransferases	NA	NA	NA	NA	NA	NA	NA	Up	0.292068	No	Down	0.31595	No	Down	0.0328031	No
Ophcf2|00203	scaffold_01:1172336-1174249	Alive	Fungus	OK	176.059	134.125	-0.39248	-0.823851	0.10385	0.188619	no	phosphoglucomutase	PF00408|PGM_PMM_IV; PF02878|PGM_PMM_I; PF02880|PGM_PMM_III; PF02879|PGM_PMM_II;	NA	NA	NA	GO:0003824|catalytic activity; GO:0003674|molecular_function; GO:0016853|isomerase activity; GO:0008150|biological_process; GO:0016866|intramolecular transferase activity; GO:0005975|carbohydrate metabolic process; GO:0071704|organic substance metabolic process; GO:0016868|intramolecular transferase activity, phosphotransferases; GO:0044238|primary metabolic process; GO:0008152|metabolic process;	NA	NA	NA	Ophio5|6556	0.917	1042.34	0	0.9982	221.52	293.103	171.034	PF02878.11|PGM_PMM_I;PF02880.11|PGM_PMM_III;PF02879.11|PGM_PMM_II;PF00408.15|PGM_PMM_IV	GO:0005975|carbohydrate metabolic process;GO:0016868|intramolecular transferase activity, phosphotransferases	NA	NA	NA	NA	NA	NA	NA	Up	0.292068	No	Down	0.31595	No	Down	0.0328031	No
Ophcf2|00203	scaffold_01:1172336-1174249	Dead	Fungus	OK	273.311	134.125	-1.02697	-2.04655	0.0001	0.000453723	yes	phosphoglucomutase	PF00408|PGM_PMM_IV; PF02878|PGM_PMM_I; PF02880|PGM_PMM_III; PF02879|PGM_PMM_II;	NA	NA	NA	GO:0003824|catalytic activity; GO:0003674|molecular_function; GO:0016853|isomerase activity; GO:0008150|biological_process; GO:0016866|intramolecular transferase activity; GO:0005975|carbohydrate metabolic process; GO:0071704|organic substance metabolic process; GO:0016868|intramolecular transferase activity, phosphotransferases; GO:0044238|primary metabolic process; GO:0008152|metabolic process;	NA	NA	NA	Ophio5|6556	0.917	1042.34	0	0.9982	221.52	293.103	171.034	PF02878.11|PGM_PMM_I;PF02880.11|PGM_PMM_III;PF02879.11|PGM_PMM_II;PF00408.15|PGM_PMM_IV	GO:0005975|carbohydrate metabolic process;GO:0016868|intramolecular transferase activity, phosphotransferases	NA	NA	NA	NA	NA	NA	NA	Up	0.292068	No	Down	0.31595	No	Down	0.0328031	No
Ophcf2|00204	scaffold_01:1174507-1175026	Dead	Fungus	OK	222.32	88.945	-1.32166	-2.76566	5e-05	0.000237974	yes	exonuclease family protein	PF00929|RNase_T;	NA	NA	NA	NA	NA	NA	NA	Ophio5|6557	0.753	263.848	1.29e-91	0.9827	63.8906	33.5285	30.5146	PF00929.19|RNase_T	NA	NA	NA	NA	NA	NA	NA	NA	Down	0.0268495	No	Down	0.00794416	Yes	Down	0.809607	No
Ophcf2|00204	scaffold_01:1174507-1175026	Alive	Fungus	OK	128.989	88.945	-0.536262	-1.08373	0.03925	0.0855261	no	exonuclease family protein	PF00929|RNase_T;	NA	NA	NA	NA	NA	NA	NA	Ophio5|6557	0.753	263.848	1.29e-91	0.9827	63.8906	33.5285	30.5146	PF00929.19|RNase_T	NA	NA	NA	NA	NA	NA	NA	NA	Down	0.0268495	No	Down	0.00794416	Yes	Down	0.809607	No
Ophcf2|00204	scaffold_01:1174507-1175026	Alive	Dead	OK	128.989	222.32	0.785394	1.69823	0.0002	0.000851223	yes	exonuclease family protein	PF00929|RNase_T;	NA	NA	NA	NA	NA	NA	NA	Ophio5|6557	0.753	263.848	1.29e-91	0.9827	63.8906	33.5285	30.5146	PF00929.19|RNase_T	NA	NA	NA	NA	NA	NA	NA	NA	Down	0.0268495	No	Down	0.00794416	Yes	Down	0.809607	No
Ophcf2|00205	scaffold_01:1175137-1176991	Dead	Fungus	OK	36.7675	18.209	-1.01378	-2.04216	0.0001	0.000453723	yes	streptomycin biosynthesis protein StrI	PF01408|GFO_IDH_MocA;	NA	NA	NA	GO:0003824|catalytic activity; GO:0016491|oxidoreductase activity; GO:0003674|molecular_function;	NA	NA	NA	Ophio5|6558	0.813	811.216	0	0.9477	43.0782	41.7992	25.441	PF01408.17|GFO_IDH_MocA	GO:0016491|oxidoreductase activity	NA	NA	NA	NA	NA	NA	NA	Down	0.920854	No	Down	0.0238166	No	Down	0.037946	No
Ophcf2|00205	scaffold_01:1175137-1176991	Alive	Dead	OK	22.5644	36.7675	0.70438	1.44885	0.0016	0.00543325	yes	streptomycin biosynthesis protein StrI	PF01408|GFO_IDH_MocA;	NA	NA	NA	GO:0003824|catalytic activity; GO:0016491|oxidoreductase activity; GO:0003674|molecular_function;	NA	NA	NA	Ophio5|6558	0.813	811.216	0	0.9477	43.0782	41.7992	25.441	PF01408.17|GFO_IDH_MocA	GO:0016491|oxidoreductase activity	NA	NA	NA	NA	NA	NA	NA	Down	0.920854	No	Down	0.0238166	No	Down	0.037946	No
Ophcf2|00205	scaffold_01:1175137-1176991	Alive	Fungus	OK	22.5644	18.209	-0.309397	-0.59443	0.2561	0.382739	no	streptomycin biosynthesis protein StrI	PF01408|GFO_IDH_MocA;	NA	NA	NA	GO:0003824|catalytic activity; GO:0016491|oxidoreductase activity; GO:0003674|molecular_function;	NA	NA	NA	Ophio5|6558	0.813	811.216	0	0.9477	43.0782	41.7992	25.441	PF01408.17|GFO_IDH_MocA	GO:0016491|oxidoreductase activity	NA	NA	NA	NA	NA	NA	NA	Down	0.920854	No	Down	0.0238166	No	Down	0.037946	No
Ophcf2|00206	scaffold_01:1178247-1179363	Alive	Fungus	OK	29.7654	19.8303	-0.585932	-1.09282	0.028	0.0646361	no	NUDIX hydrolase domain-containingprotein	NA	NA	NA	NA	NA	NA	NA	NA	Ophio5|4323	0.786	568.54	0	0.9973	43.9866	53.4559	40.476	NA	NA	NA	NA	NA	NA	NA	NA	NA	Up	0.442068	No	Down	0.768438	No	Down	0.257325	No
Ophcf2|00206	scaffold_01:1178247-1179363	Alive	Dead	OK	29.7654	39.8961	0.422613	0.84708	0.05165	0.107052	no	NUDIX hydrolase domain-containingprotein	NA	NA	NA	NA	NA	NA	NA	NA	Ophio5|4323	0.786	568.54	0	0.9973	43.9866	53.4559	40.476	NA	NA	NA	NA	NA	NA	NA	NA	NA	Up	0.442068	No	Down	0.768438	No	Down	0.257325	No
Ophcf2|00206	scaffold_01:1178247-1179363	Dead	Fungus	OK	39.8961	19.8303	-1.00854	-1.93634	0.00015	0.000657088	yes	NUDIX hydrolase domain-containingprotein	NA	NA	NA	NA	NA	NA	NA	NA	Ophio5|4323	0.786	568.54	0	0.9973	43.9866	53.4559	40.476	NA	NA	NA	NA	NA	NA	NA	NA	NA	Up	0.442068	No	Down	0.768438	No	Down	0.257325	No
Ophcf2|00207	scaffold_01:1180122-1180748	Alive	Fungus	OK	294.925	349.181	0.243628	0.553935	0.2776	0.406727	no	NADH-ubiquinone oxidoreductase 17.8 kDa subunit	NA	NA	NA	NA	NA	NA	NA	NA	Ophio5|4322	0.659	242.276	1.73e-83	0.9939	222.765	272.676	172.828	NA	NA	NA	NA	NA	NA	NA	NA	NA	Up	0.417864	No	Down	0.285989	No	Down	0.0389703	No
Ophcf2|00207	scaffold_01:1180122-1180748	Dead	Fungus	OK	361.999	349.181	-0.0520115	-0.11851	0.81985	0.884341	no	NADH-ubiquinone oxidoreductase 17.8 kDa subunit	NA	NA	NA	NA	NA	NA	NA	NA	Ophio5|4322	0.659	242.276	1.73e-83	0.9939	222.765	272.676	172.828	NA	NA	NA	NA	NA	NA	NA	NA	NA	Up	0.417864	No	Down	0.285989	No	Down	0.0389703	No
Ophcf2|00207	scaffold_01:1180122-1180748	Alive	Dead	OK	294.925	361.999	0.295639	0.665067	0.13465	0.231482	no	NADH-ubiquinone oxidoreductase 17.8 kDa subunit	NA	NA	NA	NA	NA	NA	NA	NA	Ophio5|4322	0.659	242.276	1.73e-83	0.9939	222.765	272.676	172.828	NA	NA	NA	NA	NA	NA	NA	NA	NA	Up	0.417864	No	Down	0.285989	No	Down	0.0389703	No
Ophcf2|00208	scaffold_01:1181249-1181943	Alive	Dead	OK	1914.44	2193.99	0.196633	0.356917	0.4106	0.547958	no	40S ribosomal protein S15	PF00203|Ribosomal_S19;	NA	NA	NA	GO:0005575|cellular_component; GO:0003735|structural constituent of ribosome; GO:0003674|molecular_function; GO:0071704|organic substance metabolic process; GO:0009987|cellular process; GO:1990904|ribonucleoprotein complex; GO:0044424|intracellular part; GO:0044267|cellular protein metabolic process; GO:0032991|protein-containing complex; GO:0043170|macromolecule metabolic process; GO:0043229|int…	NA	NA	NA	Ophio5|4321	0.98	303.908	1.55e-108	0.9935	1114.92	2259.32	2151.27	PF00203.16|Ribosomal_S19	GO:0006412|translation;GO:0005840|ribosome;GO:0003735|structural constituent of ribosome	NA	NA	NA	NA	NA	NA	NA	Up	0.0329187	Yes	Up	0.0138398	No	Down	0.904556	No
Ophcf2|00208	scaffold_01:1181249-1181943	Alive	Fungus	OK	1914.44	1611.54	-0.248481	-0.467744	0.3505	0.487069	no	40S ribosomal protein S15	PF00203|Ribosomal_S19;	NA	NA	NA	GO:0005575|cellular_component; GO:0003735|structural constituent of ribosome; GO:0003674|molecular_function; GO:0071704|organic substance metabolic process; GO:0009987|cellular process; GO:1990904|ribonucleoprotein complex; GO:0044424|intracellular part; GO:0044267|cellular protein metabolic process; GO:0032991|protein-containing complex; GO:0043170|macromolecule metabolic process; GO:0043229|int…	NA	NA	NA	Ophio5|4321	0.98	303.908	1.55e-108	0.9935	1114.92	2259.32	2151.27	PF00203.16|Ribosomal_S19	GO:0006412|translation;GO:0005840|ribosome;GO:0003735|structural constituent of ribosome	NA	NA	NA	NA	NA	NA	NA	Up	0.0329187	Yes	Up	0.0138398	No	Down	0.904556	No
Ophcf2|00208	scaffold_01:1181249-1181943	Dead	Fungus	OK	2193.99	1611.54	-0.445114	-0.823664	0.1021	0.186052	no	40S ribosomal protein S15	PF00203|Ribosomal_S19;	NA	NA	NA	GO:0005575|cellular_component; GO:0003735|structural constituent of ribosome; GO:0003674|molecular_function; GO:0071704|organic substance metabolic process; GO:0009987|cellular process; GO:1990904|ribonucleoprotein complex; GO:0044424|intracellular part; GO:0044267|cellular protein metabolic process; GO:0032991|protein-containing complex; GO:0043170|macromolecule metabolic process; GO:0043229|int…	NA	NA	NA	Ophio5|4321	0.98	303.908	1.55e-108	0.9935	1114.92	2259.32	2151.27	PF00203.16|Ribosomal_S19	GO:0006412|translation;GO:0005840|ribosome;GO:0003735|structural constituent of ribosome	NA	NA	NA	NA	NA	NA	NA	Up	0.0329187	Yes	Up	0.0138398	No	Down	0.904556	No
Ophcf2|00209	scaffold_01:1184388-1185545	Alive	Fungus	OK	28.8436	8.31905	-1.79376	-2.61362	5e-05	0.000237974	yes	predicted protein	NA	NA	NA	NA	NA	NA	NA	1;	Ophio5|4319	0.826	194.897	7.7e-63	0.346	39.1183	35.305	24.5874	NA	NA	NA	NA	NA	1	NA	NA	NA	Down	0.816331	No	Down	0.192965	No	Down	0.364382	No
Ophcf2|00209	scaffold_01:1184388-1185545	Alive	Dead	OK	28.8436	17.6685	-0.707076	-1.1091	0.011	0.0293288	yes	predicted protein	NA	NA	NA	NA	NA	NA	NA	1;	Ophio5|4319	0.826	194.897	7.7e-63	0.346	39.1183	35.305	24.5874	NA	NA	NA	NA	NA	1	NA	NA	NA	Down	0.816331	No	Down	0.192965	No	Down	0.364382	No
Ophcf2|00209	scaffold_01:1184388-1185545	Dead	Fungus	OK	17.6685	8.31905	-1.08668	-1.6984	0.00145	0.00498271	yes	predicted protein	NA	NA	NA	NA	NA	NA	NA	1;	Ophio5|4319	0.826	194.897	7.7e-63	0.346	39.1183	35.305	24.5874	NA	NA	NA	NA	NA	1	NA	NA	NA	Down	0.816331	No	Down	0.192965	No	Down	0.364382	No
Ophcf2|00210	scaffold_01:1186376-1187988	Alive	Dead	OK	135.289	123.575	-0.130656	-0.278323	0.53345	0.660724	no	tubulin alpha chain	PF00091|Tubulin; PF03953|Tubulin_C;	NA	NA	NA	GO:0003824|catalytic activity; GO:0016787|hydrolase activity; GO:0003924|GTPase activity; GO:0017111|nucleoside-triphosphatase activity; GO:0016818|hydrolase activity, acting on acid anhydrides, in phosphorus-containing anhydrides; GO:0003674|molecular_function; GO:0016462|pyrophosphatase activity; GO:0016817|hydrolase activity, acting on acid anhydrides;	NA	NA	NA	Ophio5|4318	0.954	828.935	0	0.9978	75.1713	70.7968	54.9084	PF00091.20|Tubulin;PF03953.12|Tubulin_C	GO:0043234|protein complex;GO:0006184|GTP catabolic process;GO:0003924|GTPase activity;GO:0005525|GTP binding;GO:0051258|protein polymerization	NA	NA	NA	NA	NA	NA	NA	Down	0.839735	No	Down	0.175532	No	Down	0.310479	No
Ophcf2|00210	scaffold_01:1186376-1187988	Alive	Fungus	OK	135.289	66.8746	-1.01651	-2.19637	0.0002	0.000851223	yes	tubulin alpha chain	PF00091|Tubulin; PF03953|Tubulin_C;	NA	NA	NA	GO:0003824|catalytic activity; GO:0016787|hydrolase activity; GO:0003924|GTPase activity; GO:0017111|nucleoside-triphosphatase activity; GO:0016818|hydrolase activity, acting on acid anhydrides, in phosphorus-containing anhydrides; GO:0003674|molecular_function; GO:0016462|pyrophosphatase activity; GO:0016817|hydrolase activity, acting on acid anhydrides;	NA	NA	NA	Ophio5|4318	0.954	828.935	0	0.9978	75.1713	70.7968	54.9084	PF00091.20|Tubulin;PF03953.12|Tubulin_C	GO:0043234|protein complex;GO:0006184|GTP catabolic process;GO:0003924|GTPase activity;GO:0005525|GTP binding;GO:0051258|protein polymerization	NA	NA	NA	NA	NA	NA	NA	Down	0.839735	No	Down	0.175532	No	Down	0.310479	No
Ophcf2|00210	scaffold_01:1186376-1187988	Dead	Fungus	OK	123.575	66.8746	-0.885856	-1.99356	0.0002	0.000851223	yes	tubulin alpha chain	PF00091|Tubulin; PF03953|Tubulin_C;	NA	NA	NA	GO:0003824|catalytic activity; GO:0016787|hydrolase activity; GO:0003924|GTPase activity; GO:0017111|nucleoside-triphosphatase activity; GO:0016818|hydrolase activity, acting on acid anhydrides, in phosphorus-containing anhydrides; GO:0003674|molecular_function; GO:0016462|pyrophosphatase activity; GO:0016817|hydrolase activity, acting on acid anhydrides;	NA	NA	NA	Ophio5|4318	0.954	828.935	0	0.9978	75.1713	70.7968	54.9084	PF00091.20|Tubulin;PF03953.12|Tubulin_C	GO:0043234|protein complex;GO:0006184|GTP catabolic process;GO:0003924|GTPase activity;GO:0005525|GTP binding;GO:0051258|protein polymerization	NA	NA	NA	NA	NA	NA	NA	Down	0.839735	No	Down	0.175532	No	Down	0.310479	No
Ophcf2|00211	scaffold_01:1188435-1190150	Alive	Fungus	OK	82.5505	56.6445	-0.543341	-1.236	0.0167	0.0417307	yes	nucleolar protein 12	PF00076|RRM_1;	NA	NA	NA	GO:0005488|binding; GO:0097159|organic cyclic compound binding; GO:0003674|molecular_function; GO:0003676|nucleic acid binding; GO:1901363|heterocyclic compound binding;	NA	NA	NA	Ophio5|4317	0.698	696.427	0	0.9962	61.7976	105.812	83.5134	PF00076.17|RRM_1;PF13893.1|RRM_5;PF14259.1|RRM_6	GO:0003676|nucleic acid binding	NA	NA	NA	NA	NA	NA	NA	Up	0.0163513	No	Up	0.200692	No	Down	0.319583	No
Ophcf2|00211	scaffold_01:1188435-1190150	Dead	Fungus	OK	82.1796	56.6445	-0.536844	-1.21982	0.0187	0.0459878	yes	nucleolar protein 12	PF00076|RRM_1;	NA	NA	NA	GO:0005488|binding; GO:0097159|organic cyclic compound binding; GO:0003674|molecular_function; GO:0003676|nucleic acid binding; GO:1901363|heterocyclic compound binding;	NA	NA	NA	Ophio5|4317	0.698	696.427	0	0.9962	61.7976	105.812	83.5134	PF00076.17|RRM_1;PF13893.1|RRM_5;PF14259.1|RRM_6	GO:0003676|nucleic acid binding	NA	NA	NA	NA	NA	NA	NA	Up	0.0163513	No	Up	0.200692	No	Down	0.319583	No
Ophcf2|00211	scaffold_01:1188435-1190150	Alive	Dead	OK	82.5505	82.1796	-0.00649676	-0.0146947	0.97375	0.98477	no	nucleolar protein 12	PF00076|RRM_1;	NA	NA	NA	GO:0005488|binding; GO:0097159|organic cyclic compound binding; GO:0003674|molecular_function; GO:0003676|nucleic acid binding; GO:1901363|heterocyclic compound binding;	NA	NA	NA	Ophio5|4317	0.698	696.427	0	0.9962	61.7976	105.812	83.5134	PF00076.17|RRM_1;PF13893.1|RRM_5;PF14259.1|RRM_6	GO:0003676|nucleic acid binding	NA	NA	NA	NA	NA	NA	NA	Up	0.0163513	No	Up	0.200692	No	Down	0.319583	No
Ophcf2|00212	scaffold_01:1190941-1192980	Alive	Dead	OK	30.0083	37.0489	0.304069	0.671184	0.12955	0.224521	no	Sds3-like protein	PF08598|Sds3;	NA	NA	NA	NA	NA	NA	NA	Ophio5|4316	0.786	909.057	0	0.9759	36.5956	25.3668	28.044	PF08598.6|Sds3	NA	NA	NA	NA	NA	NA	NA	NA	Down	0.117281	No	Down	0.269896	No	Up	0.725357	No
Ophcf2|00212	scaffold_01:1190941-1192980	Dead	Fungus	OK	37.0489	33.4306	-0.148262	-0.331122	0.51635	0.645699	no	Sds3-like protein	PF08598|Sds3;	NA	NA	NA	NA	NA	NA	NA	Ophio5|4316	0.786	909.057	0	0.9759	36.5956	25.3668	28.044	PF08598.6|Sds3	NA	NA	NA	NA	NA	NA	NA	NA	Down	0.117281	No	Down	0.269896	No	Up	0.725357	No
Ophcf2|00212	scaffold_01:1190941-1192980	Alive	Fungus	OK	30.0083	33.4306	0.155806	0.342341	0.4928	0.624578	no	Sds3-like protein	PF08598|Sds3;	NA	NA	NA	NA	NA	NA	NA	Ophio5|4316	0.786	909.057	0	0.9759	36.5956	25.3668	28.044	PF08598.6|Sds3	NA	NA	NA	NA	NA	NA	NA	NA	Down	0.117281	No	Down	0.269896	No	Up	0.725357	No
Ophcf2|00213	scaffold_01:1193508-1193865	Alive	Dead	OK	684.208	676.755	-0.0158014	-0.0303988	0.94495	0.965587	no	Coiled-coil domain-containing protein 56	PF09813|Coiled-coil_56;	NA	NA	NA	NA	NA	NA	1;	Ophio5|4315	0.757	118.242	1.81e-37	0.9867	187.921	134.881	191.229	PF09813.4|Coiled-coil_56	NA	NA	NA	NA	1	NA	NA	NA	Down	0.339929	No	Up	0.964294	No	Up	0.316164	No
Ophcf2|00213	scaffold_01:1193508-1193865	Dead	Fungus	OK	676.755	1028.17	0.603375	1.2363	0.01755	0.0436071	yes	Coiled-coil domain-containing protein 56	PF09813|Coiled-coil_56;	NA	NA	NA	NA	NA	NA	1;	Ophio5|4315	0.757	118.242	1.81e-37	0.9867	187.921	134.881	191.229	PF09813.4|Coiled-coil_56	NA	NA	NA	NA	1	NA	NA	NA	Down	0.339929	No	Up	0.964294	No	Up	0.316164	No
Ophcf2|00213	scaffold_01:1193508-1193865	Alive	Fungus	OK	684.208	1028.17	0.587573	1.17036	0.02045	0.0495625	yes	Coiled-coil domain-containing protein 56	PF09813|Coiled-coil_56;	NA	NA	NA	NA	NA	NA	1;	Ophio5|4315	0.757	118.242	1.81e-37	0.9867	187.921	134.881	191.229	PF09813.4|Coiled-coil_56	NA	NA	NA	NA	1	NA	NA	NA	Down	0.339929	No	Up	0.964294	No	Up	0.316164	No
Ophcf2|00214	scaffold_01:1194722-1197407	Alive	Fungus	OK	47.2218	36.0229	-0.390538	-0.877773	0.0844	0.159526	no	mRNA cleavage and polyadenylation specificity factor complex subunit	PF11935|DUF3453;	NA	NA	NA	NA	NA	NA	NA	Ophio5|4314	0.821	1227.23	0	0.9535	32.4832	25.0617	25.9006	PF11935.3|DUF3453	NA	NA	NA	NA	NA	NA	NA	NA	Down	0.272362	No	Down	0.349231	No	Up	0.91039	No
Ophcf2|00214	scaffold_01:1194722-1197407	Alive	Dead	OK	47.2218	48.9319	0.0513229	0.114598	0.79745	0.868649	no	mRNA cleavage and polyadenylation specificity factor complex subunit	PF11935|DUF3453;	NA	NA	NA	NA	NA	NA	NA	Ophio5|4314	0.821	1227.23	0	0.9535	32.4832	25.0617	25.9006	PF11935.3|DUF3453	NA	NA	NA	NA	NA	NA	NA	NA	Down	0.272362	No	Down	0.349231	No	Up	0.91039	No
Ophcf2|00214	scaffold_01:1194722-1197407	Dead	Fungus	OK	48.9319	36.0229	-0.441861	-1.00936	0.0492	0.102953	no	mRNA cleavage and polyadenylation specificity factor complex subunit	PF11935|DUF3453;	NA	NA	NA	NA	NA	NA	NA	Ophio5|4314	0.821	1227.23	0	0.9535	32.4832	25.0617	25.9006	PF11935.3|DUF3453	NA	NA	NA	NA	NA	NA	NA	NA	Down	0.272362	No	Down	0.349231	No	Up	0.91039	No
Ophcf2|00215	scaffold_01:1198294-1199857	Alive	Fungus	OK	46.3396	68.2031	0.55759	1.23824	0.0138	0.035538	yes	chromosome segregation protein SMC-like	NA	NA	NA	NA	NA	NA	NA	NA	Ophio5|4313	0.816	665.996	0	0.9976	49.2033	16.6537	25.6352	NA	NA	NA	NA	NA	NA	NA	NA	NA	Down	0.000285532	Yes	Down	0.00650469	No	Up	0.118978	No
Ophcf2|00215	scaffold_01:1198294-1199857	Alive	Dead	OK	46.3396	56.8031	0.293723	0.645567	0.1379	0.236015	no	chromosome segregation protein SMC-like	NA	NA	NA	NA	NA	NA	NA	NA	Ophio5|4313	0.816	665.996	0	0.9976	49.2033	16.6537	25.6352	NA	NA	NA	NA	NA	NA	NA	NA	NA	Down	0.000285532	Yes	Down	0.00650469	No	Up	0.118978	No
Ophcf2|00215	scaffold_01:1198294-1199857	Dead	Fungus	OK	56.8031	68.2031	0.263868	0.595271	0.23885	0.363251	no	chromosome segregation protein SMC-like	NA	NA	NA	NA	NA	NA	NA	NA	Ophio5|4313	0.816	665.996	0	0.9976	49.2033	16.6537	25.6352	NA	NA	NA	NA	NA	NA	NA	NA	NA	Down	0.000285532	Yes	Down	0.00650469	No	Up	0.118978	No
Ophcf2|00216	scaffold_01:1200850-1203606	Alive	Dead	OK	24.5059	34.549	0.495512	1.10701	0.01195	0.0313731	yes	hypothetical protein CDD80_6240	NA	NA	NA	NA	NA	NA	NA	NA	Ophio5|5891	0.607	1034.63	0	0.9874	30.5482	17.2094	27.653	NA	NA	NA	NA	NA	NA	NA	NA	NA	Down	0.011207	No	Down	0.699277	No	Up	0.0336445	No
Ophcf2|00216	scaffold_01:1200850-1203606	Alive	Fungus	OK	24.5059	40.0369	0.708198	1.59026	0.00175	0.00588517	yes	hypothetical protein CDD80_6240	NA	NA	NA	NA	NA	NA	NA	NA	Ophio5|5891	0.607	1034.63	0	0.9874	30.5482	17.2094	27.653	NA	NA	NA	NA	NA	NA	NA	NA	NA	Down	0.011207	No	Down	0.699277	No	Up	0.0336445	No
Ophcf2|00216	scaffold_01:1200850-1203606	Dead	Fungus	OK	34.549	40.0369	0.212685	0.487699	0.33895	0.474319	no	hypothetical protein CDD80_6240	NA	NA	NA	NA	NA	NA	NA	NA	Ophio5|5891	0.607	1034.63	0	0.9874	30.5482	17.2094	27.653	NA	NA	NA	NA	NA	NA	NA	NA	NA	Down	0.011207	No	Down	0.699277	No	Up	0.0336445	No
Ophcf2|00217	scaffold_01:1204903-1205503	Alive	Fungus	OK	73.5898	21.7154	-1.76079	-3.09846	5e-05	0.000237974	yes	hypothetical protein CDD80_6239	NA	Has signal peptide;	Small secreted protein;	NA	NA	NA	NA	NA	NA	NA	NA	NA	NA	NA	NA	NA	NA	NA	NA	NA	NA	NA	NA	NA	NA	NA	NA	NA	NA	NA	NA	NA	NA	NA
Ophcf2|00217	scaffold_01:1204903-1205503	Dead	Fungus	OK	57.8745	21.7154	-1.41421	-2.44439	5e-05	0.000237974	yes	hypothetical protein CDD80_6239	NA	Has signal peptide;	Small secreted protein;	NA	NA	NA	NA	NA	NA	NA	NA	NA	NA	NA	NA	NA	NA	NA	NA	NA	NA	NA	NA	NA	NA	NA	NA	NA	NA	NA	NA	NA	NA	NA
Ophcf2|00217	scaffold_01:1204903-1205503	Alive	Dead	OK	73.5898	57.8745	-0.346579	-0.67025	0.1285	0.223024	no	hypothetical protein CDD80_6239	NA	Has signal peptide;	Small secreted protein;	NA	NA	NA	NA	NA	NA	NA	NA	NA	NA	NA	NA	NA	NA	NA	NA	NA	NA	NA	NA	NA	NA	NA	NA	NA	NA	NA	NA	NA	NA	NA
Ophcf2|00218	scaffold_01:1206334-1206958	Alive	Fungus	OK	125.766	44.3666	-1.50319	-2.74507	5e-05	0.000237974	yes	hypothetical protein CDD80_6238	NA	Has signal peptide;	Small secreted protein;	NA	NA	NA	NA	NA	Ophio5|5889	0.442	119.398	6.31e-35	0.988	2.85613	0	1.06696	NA	NA	NA	NA	NA	NA	NA	NA	NA	Down	0.000285532	No	Down	0.124518	No	Up	1	No
Ophcf2|00218	scaffold_01:1206334-1206958	Alive	Dead	OK	125.766	113.039	-0.153918	-0.311492	0.48635	0.618694	no	hypothetical protein CDD80_6238	NA	Has signal peptide;	Small secreted protein;	NA	NA	NA	NA	NA	Ophio5|5889	0.442	119.398	6.31e-35	0.988	2.85613	0	1.06696	NA	NA	NA	NA	NA	NA	NA	NA	NA	Down	0.000285532	No	Down	0.124518	No	Up	1	No
Ophcf2|00218	scaffold_01:1206334-1206958	Dead	Fungus	OK	113.039	44.3666	-1.34927	-2.46226	5e-05	0.000237974	yes	hypothetical protein CDD80_6238	NA	Has signal peptide;	Small secreted protein;	NA	NA	NA	NA	NA	Ophio5|5889	0.442	119.398	6.31e-35	0.988	2.85613	0	1.06696	NA	NA	NA	NA	NA	NA	NA	NA	NA	Down	0.000285532	No	Down	0.124518	No	Up	1	No
Ophcf2|00219	scaffold_01:1207338-1208780	Alive	Dead	OK	81.1508	95.3314	0.232346	0.515238	0.2502	0.376347	no	3-beta hydroxysteroid dehydrogenase/isomerase	PF01370|Epimerase; PF07993|NAD_binding_4; PF01073|3Beta_HSD;	Has signal peptide;	NA	NA	GO:0006694|steroid biosynthetic process; GO:0016614|oxidoreductase activity, acting on CH-OH group of donors; GO:0003674|molecular_function; GO:0071704|organic substance metabolic process; GO:0006629|lipid metabolic process; GO:0003854|3-beta-hydroxy-delta5-steroid dehydrogenase activity; GO:0005488|binding; GO:0016229|steroid dehydrogenase activity; GO:0055114|oxidation-reduction process; GO:004…	NA	NA	NA	Ophio5|5888	0.778	293.508	5.26e-96	0.4267	68.2899	42.677	51.9271	PF01073.14|3Beta_HSD;PF00106.20|adh_short;PF01370.16|Epimerase	GO:0003854|3-beta-hydroxy-delta5-steroid dehydrogenase activity;GO:0016491|oxidoreductase activity;GO:0055114|oxidation-reduction process;GO:0008152|metabolic process;GO:0044237|cellular metabolic process;GO:0050662|coenzyme binding;GO:0006694|steroid biosynthetic process;GO:0003824|catalytic activity;GO:0016616|oxidoreductase activity, acting on the CH-OH group of donors, NAD or NADP as acceptor	NA	NA	NA	2	NA	NA	NA	Down	0.0480155	No	Down	0.239588	No	Up	0.463783	No
Ophcf2|00219	scaffold_01:1207338-1208780	Dead	Fungus	OK	95.3314	37.2519	-1.35564	-2.97931	5e-05	0.000237974	yes	3-beta hydroxysteroid dehydrogenase/isomerase	PF01370|Epimerase; PF07993|NAD_binding_4; PF01073|3Beta_HSD;	Has signal peptide;	NA	NA	GO:0006694|steroid biosynthetic process; GO:0016614|oxidoreductase activity, acting on CH-OH group of donors; GO:0003674|molecular_function; GO:0071704|organic substance metabolic process; GO:0006629|lipid metabolic process; GO:0003854|3-beta-hydroxy-delta5-steroid dehydrogenase activity; GO:0005488|binding; GO:0016229|steroid dehydrogenase activity; GO:0055114|oxidation-reduction process; GO:004…	NA	NA	NA	Ophio5|5888	0.778	293.508	5.26e-96	0.4267	68.2899	42.677	51.9271	PF01073.14|3Beta_HSD;PF00106.20|adh_short;PF01370.16|Epimerase	GO:0003854|3-beta-hydroxy-delta5-steroid dehydrogenase activity;GO:0016491|oxidoreductase activity;GO:0055114|oxidation-reduction process;GO:0008152|metabolic process;GO:0044237|cellular metabolic process;GO:0050662|coenzyme binding;GO:0006694|steroid biosynthetic process;GO:0003824|catalytic activity;GO:0016616|oxidoreductase activity, acting on the CH-OH group of donors, NAD or NADP as acceptor	NA	NA	NA	2	NA	NA	NA	Down	0.0480155	No	Down	0.239588	No	Up	0.463783	No
Ophcf2|00219	scaffold_01:1207338-1208780	Alive	Fungus	OK	81.1508	37.2519	-1.12329	-2.45364	5e-05	0.000237974	yes	3-beta hydroxysteroid dehydrogenase/isomerase	PF01370|Epimerase; PF07993|NAD_binding_4; PF01073|3Beta_HSD;	Has signal peptide;	NA	NA	GO:0006694|steroid biosynthetic process; GO:0016614|oxidoreductase activity, acting on CH-OH group of donors; GO:0003674|molecular_function; GO:0071704|organic substance metabolic process; GO:0006629|lipid metabolic process; GO:0003854|3-beta-hydroxy-delta5-steroid dehydrogenase activity; GO:0005488|binding; GO:0016229|steroid dehydrogenase activity; GO:0055114|oxidation-reduction process; GO:004…	NA	NA	NA	Ophio5|5888	0.778	293.508	5.26e-96	0.4267	68.2899	42.677	51.9271	PF01073.14|3Beta_HSD;PF00106.20|adh_short;PF01370.16|Epimerase	GO:0003854|3-beta-hydroxy-delta5-steroid dehydrogenase activity;GO:0016491|oxidoreductase activity;GO:0055114|oxidation-reduction process;GO:0008152|metabolic process;GO:0044237|cellular metabolic process;GO:0050662|coenzyme binding;GO:0006694|steroid biosynthetic process;GO:0003824|catalytic activity;GO:0016616|oxidoreductase activity, acting on the CH-OH group of donors, NAD or NADP as acceptor	NA	NA	NA	2	NA	NA	NA	Down	0.0480155	No	Down	0.239588	No	Up	0.463783	No
Ophcf2|00220	scaffold_01:1209344-1211443	Alive	Fungus	OK	71.5845	47.3842	-0.595241	-1.34147	0.01065	0.0285403	yes	Major facilitator superfamily domain, general substrate transporter	PF07690|MFS_1;	NA	NA	NA	GO:0051234|establishment of localization; GO:0005575|cellular_component; GO:0044425|membrane part; GO:0016021|integral component of membrane; GO:0006810|transport; GO:0008150|biological_process; GO:0031224|intrinsic component of membrane; GO:0051179|localization; GO:0055085|transmembrane transport;	NA	NA	11;	Ophio5|5887	0.835	980.319	0	0.9983	28.8754	19.0521	19.3596	PF07690.11|MFS_1	GO:0016021|integral component of membrane;GO:0055085|transmembrane transport	NA	NA	NA	12	NA	NA	NA	Down	0.113005	No	Down	0.10791	No	Up	0.964535	No
Ophcf2|00220	scaffold_01:1209344-1211443	Dead	Fungus	OK	96.7004	47.3842	-1.02911	-2.30232	5e-05	0.000237974	yes	Major facilitator superfamily domain, general substrate transporter	PF07690|MFS_1;	NA	NA	NA	GO:0051234|establishment of localization; GO:0005575|cellular_component; GO:0044425|membrane part; GO:0016021|integral component of membrane; GO:0006810|transport; GO:0008150|biological_process; GO:0031224|intrinsic component of membrane; GO:0051179|localization; GO:0055085|transmembrane transport;	NA	NA	11;	Ophio5|5887	0.835	980.319	0	0.9983	28.8754	19.0521	19.3596	PF07690.11|MFS_1	GO:0016021|integral component of membrane;GO:0055085|transmembrane transport	NA	NA	NA	12	NA	NA	NA	Down	0.113005	No	Down	0.10791	No	Up	0.964535	No
Ophcf2|00220	scaffold_01:1209344-1211443	Alive	Dead	OK	71.5845	96.7004	0.433873	0.97221	0.0275	0.0637069	no	Major facilitator superfamily domain, general substrate transporter	PF07690|MFS_1;	NA	NA	NA	GO:0051234|establishment of localization; GO:0005575|cellular_component; GO:0044425|membrane part; GO:0016021|integral component of membrane; GO:0006810|transport; GO:0008150|biological_process; GO:0031224|intrinsic component of membrane; GO:0051179|localization; GO:0055085|transmembrane transport;	NA	NA	11;	Ophio5|5887	0.835	980.319	0	0.9983	28.8754	19.0521	19.3596	PF07690.11|MFS_1	GO:0016021|integral component of membrane;GO:0055085|transmembrane transport	NA	NA	NA	12	NA	NA	NA	Down	0.113005	No	Down	0.10791	No	Up	0.964535	No
Ophcf2|00221	scaffold_01:1211723-1213449	Dead	Fungus	OK	462.823	665.526	0.524035	0.919654	0.07075	0.137782	no	histidine acid phosphatase	NA	Has signal peptide;	NA	NA	NA	NA	NA	1;	Ophio5|5886	0.725	694.886	0	0.9668	184.962	67.3638	60.0696	PF00328.17|His_Phos_2	GO:0003993|acid phosphatase activity	NA	SignalP: has predicted secretion signal	NA	1	NA	NA	NA	Down	0.000285532	Yes	Down	0.000285532	Yes	Down	0.657111	No
Ophcf2|00221	scaffold_01:1211723-1213449	Alive	Dead	OK	286.001	462.823	0.694441	1.19909	0.00845	0.0233525	yes	histidine acid phosphatase	NA	Has signal peptide;	NA	NA	NA	NA	NA	1;	Ophio5|5886	0.725	694.886	0	0.9668	184.962	67.3638	60.0696	PF00328.17|His_Phos_2	GO:0003993|acid phosphatase activity	NA	SignalP: has predicted secretion signal	NA	1	NA	NA	NA	Down	0.000285532	Yes	Down	0.000285532	Yes	Down	0.657111	No
Ophcf2|00221	scaffold_01:1211723-1213449	Alive	Fungus	OK	286.001	665.526	1.21848	2.04762	5e-05	0.000237974	yes	histidine acid phosphatase	NA	Has signal peptide;	NA	NA	NA	NA	NA	1;	Ophio5|5886	0.725	694.886	0	0.9668	184.962	67.3638	60.0696	PF00328.17|His_Phos_2	GO:0003993|acid phosphatase activity	NA	SignalP: has predicted secretion signal	NA	1	NA	NA	NA	Down	0.000285532	Yes	Down	0.000285532	Yes	Down	0.657111	No
Ophcf2|00222	scaffold_01:1214145-1215277	Alive	Fungus	OK	67.4351	17.466	-1.94895	-3.5601	5e-05	0.000237974	yes	2,4-dienoyl-CoA reductase (NADPH2)	PF13561|adh_short_C2; PF00106|adh_short; PF08659|KR;	NA	NA	NA	NA	NA	NA	NA	Ophio5|5885	0.827	506.523	0	0.9966	113.376	69.9471	53.2822	PF13561.1|adh_short_C2;PF00106.20|adh_short;PF08659.5|KR	GO:0016491|oxidoreductase activity;GO:0008152|metabolic process	NA	NA	NA	NA	NA	NA	NA	Down	0.0290022	No	Down	0.000770107	Yes	Down	0.269606	No
Ophcf2|00222	scaffold_01:1214145-1215277	Dead	Fungus	OK	75.4544	17.466	-2.11105	-3.90128	5e-05	0.000237974	yes	2,4-dienoyl-CoA reductase (NADPH2)	PF13561|adh_short_C2; PF00106|adh_short; PF08659|KR;	NA	NA	NA	NA	NA	NA	NA	Ophio5|5885	0.827	506.523	0	0.9966	113.376	69.9471	53.2822	PF13561.1|adh_short_C2;PF00106.20|adh_short;PF08659.5|KR	GO:0016491|oxidoreductase activity;GO:0008152|metabolic process	NA	NA	NA	NA	NA	NA	NA	Down	0.0290022	No	Down	0.000770107	Yes	Down	0.269606	No
Ophcf2|00222	scaffold_01:1214145-1215277	Alive	Dead	OK	67.4351	75.4544	0.162106	0.350048	0.4284	0.565416	no	2,4-dienoyl-CoA reductase (NADPH2)	PF13561|adh_short_C2; PF00106|adh_short; PF08659|KR;	NA	NA	NA	NA	NA	NA	NA	Ophio5|5885	0.827	506.523	0	0.9966	113.376	69.9471	53.2822	PF13561.1|adh_short_C2;PF00106.20|adh_short;PF08659.5|KR	GO:0016491|oxidoreductase activity;GO:0008152|metabolic process	NA	NA	NA	NA	NA	NA	NA	Down	0.0290022	No	Down	0.000770107	Yes	Down	0.269606	No
Ophcf2|00223	scaffold_01:1218503-1222624	Alive	Fungus	OK	0.703856	0.985853	0.486093	0.553957	0.26015	0.387477	no	peptidase cysteine/serine, trypsin-like protein	PF02917|Pertussis_S1;	Has signal peptide;	NA	NA	GO:0003824|catalytic activity; GO:0044419|interspecies interaction between organisms; GO:0005575|cellular_component; GO:0016763|transferase activity, transferring pentosyl groups; GO:0016740|transferase activity; GO:0003674|molecular_function; GO:0008150|biological_process; GO:0016757|transferase activity, transferring glycosyl groups; GO:0009405|pathogenesis; GO:0051704|multi-organism process; G…	NA	NA	NA	Ophio5|6442	0.61	597.43	0	0.5	7.42026	2.40688	3.63422	PF02917.9|Pertussis_S1	GO:0005576|extracellular region;GO:0009405|pathogenesis;GO:0003950|NAD+ ADP-ribosyltransferase activity	NA	SignalP: has predicted secretion signal	NA	NA	NA	NA	NA	Down	0.000285532	Yes	Down	0.0200104	Yes	Up	0.248839	No
Ophcf2|00223	scaffold_01:1218503-1222624	Alive	Dead	OK	0.703856	0.560269	-0.32916	-0.343576	0.4234	0.561013	no	peptidase cysteine/serine, trypsin-like protein	PF02917|Pertussis_S1;	Has signal peptide;	NA	NA	GO:0003824|catalytic activity; GO:0044419|interspecies interaction between organisms; GO:0005575|cellular_component; GO:0016763|transferase activity, transferring pentosyl groups; GO:0016740|transferase activity; GO:0003674|molecular_function; GO:0008150|biological_process; GO:0016757|transferase activity, transferring glycosyl groups; GO:0009405|pathogenesis; GO:0051704|multi-organism process; G…	NA	NA	NA	Ophio5|6442	0.61	597.43	0	0.5	7.42026	2.40688	3.63422	PF02917.9|Pertussis_S1	GO:0005576|extracellular region;GO:0009405|pathogenesis;GO:0003950|NAD+ ADP-ribosyltransferase activity	NA	SignalP: has predicted secretion signal	NA	NA	NA	NA	NA	Down	0.000285532	Yes	Down	0.0200104	Yes	Up	0.248839	No
Ophcf2|00223	scaffold_01:1218503-1222624	Dead	Fungus	OK	0.560269	0.985853	0.815252	0.892911	0.0845	0.159687	no	peptidase cysteine/serine, trypsin-like protein	PF02917|Pertussis_S1;	Has signal peptide;	NA	NA	GO:0003824|catalytic activity; GO:0044419|interspecies interaction between organisms; GO:0005575|cellular_component; GO:0016763|transferase activity, transferring pentosyl groups; GO:0016740|transferase activity; GO:0003674|molecular_function; GO:0008150|biological_process; GO:0016757|transferase activity, transferring glycosyl groups; GO:0009405|pathogenesis; GO:0051704|multi-organism process; G…	NA	NA	NA	Ophio5|6442	0.61	597.43	0	0.5	7.42026	2.40688	3.63422	PF02917.9|Pertussis_S1	GO:0005576|extracellular region;GO:0009405|pathogenesis;GO:0003950|NAD+ ADP-ribosyltransferase activity	NA	SignalP: has predicted secretion signal	NA	NA	NA	NA	NA	Down	0.000285532	Yes	Down	0.0200104	Yes	Up	0.248839	No
Ophcf2|00224	scaffold_01:1223368-1227798	Alive	Dead	OK	73.5193	84.6564	0.203497	0.399005	0.37215	0.508957	no	MAP kinase kinase kinase Czk3	PF07714|Pkinase_Tyr; PF00069|Pkinase;	NA	NA	NA	GO:0035639|purine ribonucleoside triphosphate binding; GO:0006464|cellular protein modification process; GO:0097159|organic cyclic compound binding; GO:0003674|molecular_function; GO:0016772|transferase activity, transferring phosphorus-containing groups; GO:0032553|ribonucleotide binding; GO:0071704|organic substance metabolic process; GO:0009987|cellular process; GO:0016301|kinase activity; GO:…	NA	NA	NA	Ophio5|5664	0.385	201.83	1.55e-52	0.191	29.2008	51.3587	38.3732	PF00069.20|Pkinase;PF07714.12|Pkinase_Tyr;PF14531.1|Kinase-like	GO:0005524|ATP binding;GO:0004672|protein kinase activity;GO:0006468|protein phosphorylation	NA	NA	NA	NA	NA	NA	NA	Up	0.0151196	No	Up	0.244358	No	Down	0.239008	No
Ophcf2|00224	scaffold_01:1223368-1227798	Dead	Fungus	OK	84.6564	76.5244	-0.145701	-0.284941	0.57195	0.69418	no	MAP kinase kinase kinase Czk3	PF07714|Pkinase_Tyr; PF00069|Pkinase;	NA	NA	NA	GO:0035639|purine ribonucleoside triphosphate binding; GO:0006464|cellular protein modification process; GO:0097159|organic cyclic compound binding; GO:0003674|molecular_function; GO:0016772|transferase activity, transferring phosphorus-containing groups; GO:0032553|ribonucleotide binding; GO:0071704|organic substance metabolic process; GO:0009987|cellular process; GO:0016301|kinase activity; GO:…	NA	NA	NA	Ophio5|5664	0.385	201.83	1.55e-52	0.191	29.2008	51.3587	38.3732	PF00069.20|Pkinase;PF07714.12|Pkinase_Tyr;PF14531.1|Kinase-like	GO:0005524|ATP binding;GO:0004672|protein kinase activity;GO:0006468|protein phosphorylation	NA	NA	NA	NA	NA	NA	NA	Up	0.0151196	No	Up	0.244358	No	Down	0.239008	No
Ophcf2|00224	scaffold_01:1223368-1227798	Alive	Fungus	OK	73.5193	76.5244	0.0577966	0.115068	0.82055	0.884584	no	MAP kinase kinase kinase Czk3	PF07714|Pkinase_Tyr; PF00069|Pkinase;	NA	NA	NA	GO:0035639|purine ribonucleoside triphosphate binding; GO:0006464|cellular protein modification process; GO:0097159|organic cyclic compound binding; GO:0003674|molecular_function; GO:0016772|transferase activity, transferring phosphorus-containing groups; GO:0032553|ribonucleotide binding; GO:0071704|organic substance metabolic process; GO:0009987|cellular process; GO:0016301|kinase activity; GO:…	NA	NA	NA	Ophio5|5664	0.385	201.83	1.55e-52	0.191	29.2008	51.3587	38.3732	PF00069.20|Pkinase;PF07714.12|Pkinase_Tyr;PF14531.1|Kinase-like	GO:0005524|ATP binding;GO:0004672|protein kinase activity;GO:0006468|protein phosphorylation	NA	NA	NA	NA	NA	NA	NA	Up	0.0151196	No	Up	0.244358	No	Down	0.239008	No
Ophcf2|00225	scaffold_01:1228165-1228438	Alive	Dead	OK	263.167	285.901	0.119539	0.219142	0.61985	0.733778	no	cytidine deaminase	PF00383|dCMP_cyt_deam_1; PF08211|dCMP_cyt_deam_2;	NA	NA	NA	GO:0009116|nucleoside metabolic process; GO:0009164|nucleoside catabolic process; GO:0003674|molecular_function; GO:1901658|glycosyl compound catabolic process; GO:0044282|small molecule catabolic process; GO:0009056|catabolic process; GO:0034655|nucleobase-containing compound catabolic process; GO:0004126|cytidine deaminase activity; GO:0071704|organic substance metabolic process; GO:0009987|cel…	NA	NA	NA	NA	NA	NA	NA	NA	NA	NA	NA	NA	NA	NA	NA	NA	NA	NA	NA	NA	NA	NA	NA	NA	NA	NA	NA	NA	NA
Ophcf2|00225	scaffold_01:1228165-1228438	Dead	Fungus	OK	285.901	203.657	-0.489377	-0.873079	0.08275	0.156943	no	cytidine deaminase	PF00383|dCMP_cyt_deam_1; PF08211|dCMP_cyt_deam_2;	NA	NA	NA	GO:0009116|nucleoside metabolic process; GO:0009164|nucleoside catabolic process; GO:0003674|molecular_function; GO:1901658|glycosyl compound catabolic process; GO:0044282|small molecule catabolic process; GO:0009056|catabolic process; GO:0034655|nucleobase-containing compound catabolic process; GO:0004126|cytidine deaminase activity; GO:0071704|organic substance metabolic process; GO:0009987|cel…	NA	NA	NA	NA	NA	NA	NA	NA	NA	NA	NA	NA	NA	NA	NA	NA	NA	NA	NA	NA	NA	NA	NA	NA	NA	NA	NA	NA	NA
Ophcf2|00225	scaffold_01:1228165-1228438	Alive	Fungus	OK	263.167	203.657	-0.369838	-0.65565	0.1919	0.306568	no	cytidine deaminase	PF00383|dCMP_cyt_deam_1; PF08211|dCMP_cyt_deam_2;	NA	NA	NA	GO:0009116|nucleoside metabolic process; GO:0009164|nucleoside catabolic process; GO:0003674|molecular_function; GO:1901658|glycosyl compound catabolic process; GO:0044282|small molecule catabolic process; GO:0009056|catabolic process; GO:0034655|nucleobase-containing compound catabolic process; GO:0004126|cytidine deaminase activity; GO:0071704|organic substance metabolic process; GO:0009987|cel…	NA	NA	NA	NA	NA	NA	NA	NA	NA	NA	NA	NA	NA	NA	NA	NA	NA	NA	NA	NA	NA	NA	NA	NA	NA	NA	NA	NA	NA
Ophcf2|00226	scaffold_01:1229090-1229502	Alive	Dead	OK	8.18749	3.59014	-1.18938	-1.05737	0.0202	0.0490227	yes	hypothetical protein CDD80_2909	NA	Has signal peptide;	Small secreted protein;	NA	NA	NA	NA	NA	NA	NA	NA	NA	NA	NA	NA	NA	NA	NA	NA	NA	NA	NA	NA	NA	NA	NA	NA	NA	NA	NA	NA	NA	NA	NA
Ophcf2|00226	scaffold_01:1229090-1229502	Alive	Fungus	OK	8.18749	1.80188	-2.18392	-1.75779	0.00535	0.0156878	yes	hypothetical protein CDD80_2909	NA	Has signal peptide;	Small secreted protein;	NA	NA	NA	NA	NA	NA	NA	NA	NA	NA	NA	NA	NA	NA	NA	NA	NA	NA	NA	NA	NA	NA	NA	NA	NA	NA	NA	NA	NA	NA	NA
Ophcf2|00226	scaffold_01:1229090-1229502	Dead	Fungus	OK	3.59014	1.80188	-0.994539	-0.740068	0.1465	0.247533	no	hypothetical protein CDD80_2909	NA	Has signal peptide;	Small secreted protein;	NA	NA	NA	NA	NA	NA	NA	NA	NA	NA	NA	NA	NA	NA	NA	NA	NA	NA	NA	NA	NA	NA	NA	NA	NA	NA	NA	NA	NA	NA	NA
Ophcf2|00227	scaffold_01:1230267-1231266	Alive	Dead	OK	198.199	159.019	-0.317747	-0.691988	0.11695	0.207383	no	basic proline-rich protein	NA	NA	NA	NA	NA	NA	NA	NA	Ophio5|7108	0.752	405.216	6.7e-143	0.97	42.3386	361.442	151.747	NA	NA	NA	NA	NA	NA	NA	NA	NA	Up	0.000285532	Yes	Up	0.000285532	Yes	Down	0.000997454	Yes
Ophcf2|00227	scaffold_01:1230267-1231266	Alive	Fungus	OK	198.199	112.152	-0.821502	-1.81164	0.0006	0.00228657	yes	basic proline-rich protein	NA	NA	NA	NA	NA	NA	NA	NA	Ophio5|7108	0.752	405.216	6.7e-143	0.97	42.3386	361.442	151.747	NA	NA	NA	NA	NA	NA	NA	NA	NA	Up	0.000285532	Yes	Up	0.000285532	Yes	Down	0.000997454	Yes
Ophcf2|00227	scaffold_01:1230267-1231266	Dead	Fungus	OK	159.019	112.152	-0.503754	-1.14622	0.02385	0.0565324	no	basic proline-rich protein	NA	NA	NA	NA	NA	NA	NA	NA	Ophio5|7108	0.752	405.216	6.7e-143	0.97	42.3386	361.442	151.747	NA	NA	NA	NA	NA	NA	NA	NA	NA	Up	0.000285532	Yes	Up	0.000285532	Yes	Down	0.000997454	Yes
Ophcf2|00228	scaffold_01:1232674-1234228	Alive	Fungus	OK	77.8835	50.6968	-0.619423	-1.40274	0.00885	0.0243054	yes	will die slowly	PF00400|WD40; PF08662|eIF2A;	NA	NA	NA	GO:0003674|molecular_function; GO:0005488|binding; GO:0005515|protein binding;	NA	NA	NA	Ophio5|7107	0.795	739.184	0	0.998	59.4247	113.556	96.8642	PF00400.27|WD40;PF00400.27|WD40;PF00400.27|WD40;PF00400.27|WD40;PF00400.27|WD40;PF00400.27|WD40;PF08662.6|eIF2A	GO:0005515|protein binding	NA	NA	NA	NA	NA	NA	NA	Up	0.00393484	No	Up	0.0256201	No	Down	0.543256	No
Ophcf2|00228	scaffold_01:1232674-1234228	Alive	Dead	OK	77.8835	50.4007	-0.627874	-1.40801	0.0016	0.00543325	yes	will die slowly	PF00400|WD40; PF08662|eIF2A;	NA	NA	NA	GO:0003674|molecular_function; GO:0005488|binding; GO:0005515|protein binding;	NA	NA	NA	Ophio5|7107	0.795	739.184	0	0.998	59.4247	113.556	96.8642	PF00400.27|WD40;PF00400.27|WD40;PF00400.27|WD40;PF00400.27|WD40;PF00400.27|WD40;PF00400.27|WD40;PF08662.6|eIF2A	GO:0005515|protein binding	NA	NA	NA	NA	NA	NA	NA	Up	0.00393484	No	Up	0.0256201	No	Down	0.543256	No
Ophcf2|00228	scaffold_01:1232674-1234228	Dead	Fungus	OK	50.4007	50.6968	0.00845054	0.0189648	0.9709	0.983161	no	will die slowly	PF00400|WD40; PF08662|eIF2A;	NA	NA	NA	GO:0003674|molecular_function; GO:0005488|binding; GO:0005515|protein binding;	NA	NA	NA	Ophio5|7107	0.795	739.184	0	0.998	59.4247	113.556	96.8642	PF00400.27|WD40;PF00400.27|WD40;PF00400.27|WD40;PF00400.27|WD40;PF00400.27|WD40;PF00400.27|WD40;PF08662.6|eIF2A	GO:0005515|protein binding	NA	NA	NA	NA	NA	NA	NA	Up	0.00393484	No	Up	0.0256201	No	Down	0.543256	No
Ophcf2|00229	scaffold_01:1236131-1236904	Alive	Dead	OK	7945.72	6701.01	-0.245799	-0.321129	0.4447	0.580816	no	ser-thr-rich glycosyl-phosphatidyl-inositol-anchored membrane family domain-containing protein	PF10342|GPI-anchored;	Has signal peptide;	Small secreted protein;	NA	NA	NA	NA	NA	Ophio5|7106	0.481	194.126	2.4e-62	0.9958	2578.26	4425.36	3955.39	PF10342.4|GPI-anchored	NA	NA	SignalP: has predicted secretion signal; SSP: small secreted protein	NA	NA	NA	NA	NA	Up	0.141219	No	Up	0.230714	No	Down	0.804472	No
Ophcf2|00229	scaffold_01:1236131-1236904	Alive	Fungus	OK	7945.72	4768	-0.736793	-0.985358	0.047	0.0990223	no	ser-thr-rich glycosyl-phosphatidyl-inositol-anchored membrane family domain-containing protein	PF10342|GPI-anchored;	Has signal peptide;	Small secreted protein;	NA	NA	NA	NA	NA	Ophio5|7106	0.481	194.126	2.4e-62	0.9958	2578.26	4425.36	3955.39	PF10342.4|GPI-anchored	NA	NA	SignalP: has predicted secretion signal; SSP: small secreted protein	NA	NA	NA	NA	NA	Up	0.141219	No	Up	0.230714	No	Down	0.804472	No
Ophcf2|00229	scaffold_01:1236131-1236904	Dead	Fungus	OK	6701.01	4768	-0.490994	-0.709928	0.1464	0.247403	no	ser-thr-rich glycosyl-phosphatidyl-inositol-anchored membrane family domain-containing protein	PF10342|GPI-anchored;	Has signal peptide;	Small secreted protein;	NA	NA	NA	NA	NA	Ophio5|7106	0.481	194.126	2.4e-62	0.9958	2578.26	4425.36	3955.39	PF10342.4|GPI-anchored	NA	NA	SignalP: has predicted secretion signal; SSP: small secreted protein	NA	NA	NA	NA	NA	Up	0.141219	No	Up	0.230714	No	Down	0.804472	No
[truncated: 21,678 more rows]

## Sheet: SecondaryMetaboliteClusters
arb2_gene	locus	cluster	type	Description	PFAM	CultureRPKM	AliveRPKM	DeadRPKM	SigAC	SigAD	SigDC	sc16a_gene	Sc16a_PFAM	Sc16a_Secondary metabolism
[truncated: 111 more rows]

## Sheet: Upregulated_LiveManipulated
arb2_gene	locus	status	AliveRPKM	DeadRPKM	log2(fold_change).Alive_Dead	test_stat	p_value	q_value	significant	FungalRPKM	log2(fold_change).Alive_Fungus	Description	PFAM	signalp	SSP	TF	GO	secondary_metabolism	MEROPS	TMHMM	sc16a_gene	% Identical Sites	% Pairwise Identity	E Value	Grade	Query coverage	Query end	Query start	Sequence Length	PFAM annotation	GO annotation (terminal nodes only)	KEGG annotation	SignalP/SmallSecretedProteins	Transcription factors	Transmembrane domains	MEROPS proteases	Manual annotations	Secondary metabolism	SC16a -> CcL: Up/Down	SC16a -> CcL: : q-value <= 0.05, fold change >= 2, and >= 1 sample with >= 4 expression value?	SC16a -> CcD: Up/Down	SC16a -> CcD: : q-value <= 0.05, fold change >= 2, and >= 1 sample with >= 4 expression value?	CcL -> CcD: Up/Down	CcL -> CcD: : q-value <= 0.05, fold change >= 2, and >= 1 sample with >= 4 expression value?
[truncated: 307 more rows]

[truncated: 26 more sheets: Up_Live_Enrichment, Upregulated_LiveManipulated_50, Up_Live_50_Enrichment, Up_LiveManip_HomologMatch, Downregulated_LiveManipulated, Down_Live_Enrichment, Downregulated_LiveManipulate_50, UpFromCulture_SteadyOrUpToDead, Up_Steady_Enrichment, DownFromCult_SteadyOrDwnToDead, Down_Steady_Enrichment, WGCNA_AllFungal, WGCNA_ModuleNaming, F1, F2, F3, F4, F5, F6, F7 …]
